# Supplementary material for: Beyond causes of death: The social determinants of mortality among children aged 1-59 months in Nigeria from 2009 to 2013
Source: PubMed Central journal article supplement (PMC5451019; doi:10.1371/journal.pone.0177025), 2017-05-31
Supplement: pone.0177025.s001.pdf [file pone.0177025.s001.pdf]

Study ID#

|                 |  |  |  |    |  |       |  |  |  |
|-----------------|--|--|--|----|--|-------|--|--|--|
|                 |  |  |  |    |  |       |  |  |  |
| Village/Cluster |  |  |  | HH |  | Child |  |  |  |

**CHILD HEALTH EPIDEMIOLOGY REFERENCE GROUP  
SB/NN/CHILD VERBAL/SOCIAL AUTOPSY QUESTIONNAIRE**

**VERBAL/SOCIAL AUTOPSY GENERAL INFORMATION (FOR SBs, NN & CHILD DEATHS 0—59 MONTHS OLD)**

**Section 1: Background about the deceased**

*Interviewer: Before going to the field to do the interview, fill in this section from the survey or surveillance record for the deceased.*

|                   |                                                                                                                                                                                                                                    |                                                                                                                                                                                                                                                                                                                                                                                                                                                                                                                                                                                                                                                                                            |                                                                                                                                                                                                                                                                                                                                                                        |   |   |   |   |   |   |   |   |   |   |   |   |   |   |   |   |                   |  |  |  |  |  |  |  |
|-------------------|------------------------------------------------------------------------------------------------------------------------------------------------------------------------------------------------------------------------------------|--------------------------------------------------------------------------------------------------------------------------------------------------------------------------------------------------------------------------------------------------------------------------------------------------------------------------------------------------------------------------------------------------------------------------------------------------------------------------------------------------------------------------------------------------------------------------------------------------------------------------------------------------------------------------------------------|------------------------------------------------------------------------------------------------------------------------------------------------------------------------------------------------------------------------------------------------------------------------------------------------------------------------------------------------------------------------|---|---|---|---|---|---|---|---|---|---|---|---|---|---|---|---|-------------------|--|--|--|--|--|--|--|
| G1.1              | Address of the household<br><i>[Copy the household address]</i>                                                                                                                                                                    | State _____                                                                                                                                                                                                                                                                                                                                                                                                                                                                                                                                                                                                                                                                                | <input type="checkbox"/> <input type="checkbox"/> <input type="checkbox"/><br><input type="checkbox"/> <input type="checkbox"/> <input type="checkbox"/><br><input type="checkbox"/> <input type="checkbox"/> <input type="checkbox"/> <input type="checkbox"/><br><input type="checkbox"/> <input type="checkbox"/> <input type="checkbox"/> <input type="checkbox"/> |   |   |   |   |   |   |   |   |   |   |   |   |   |   |   |   |                   |  |  |  |  |  |  |  |
|                   | Directions to the household<br><i>[Copy the directions to the household]</i>                                                                                                                                                       | LGA _____                                                                                                                                                                                                                                                                                                                                                                                                                                                                                                                                                                                                                                                                                  | Locality _____                                                                                                                                                                                                                                                                                                                                                         |   |   |   |   |   |   |   |   |   |   |   |   |   |   |   |   |                   |  |  |  |  |  |  |  |
|                   |                                                                                                                                                                                                                                    | EA _____                                                                                                                                                                                                                                                                                                                                                                                                                                                                                                                                                                                                                                                                                   |                                                                                                                                                                                                                                                                                                                                                                        |   |   |   |   |   |   |   |   |   |   |   |   |   |   |   |   |                   |  |  |  |  |  |  |  |
| G1.2              | Name of the deceased (if known)<br><i>[Copy the name of the deceased]</i>                                                                                                                                                          |                                                                                                                                                                                                                                                                                                                                                                                                                                                                                                                                                                                                                                                                                            |                                                                                                                                                                                                                                                                                                                                                                        |   |   |   |   |   |   |   |   |   |   |   |   |   |   |   |   |                   |  |  |  |  |  |  |  |
| G1.3              | Sex of deceased<br><i>[Copy the sex of the deceased]</i>                                                                                                                                                                           | 1. Male<br>2. Female                                                                                                                                                                                                                                                                                                                                                                                                                                                                                                                                                                                                                                                                       | <input type="checkbox"/>                                                                                                                                                                                                                                                                                                                                               |   |   |   |   |   |   |   |   |   |   |   |   |   |   |   |   |                   |  |  |  |  |  |  |  |
| G1.4              | Date of birth of the deceased<br><i>[Copy the day, month and year of birth of the deceased]</i>                                                                                                                                    | <table style="margin: auto;"> <tr> <td style="border: none;">_</td><td style="border: none;">/</td><td style="border: none;">_</td><td style="border: none;">/</td><td style="border: none;">_</td><td style="border: none;">_</td><td style="border: none;">_</td><td style="border: none;">_</td> </tr> <tr> <td style="border: none;">D</td><td style="border: none;">D</td><td style="border: none;">M</td><td style="border: none;">M</td><td style="border: none;">Y</td><td style="border: none;">Y</td><td style="border: none;">Y</td><td style="border: none;">Y</td> </tr> <tr> <td colspan="8" style="border: none; text-align: center;">(DK = 99/99/9999)</td> </tr> </table> |                                                                                                                                                                                                                                                                                                                                                                        | _ | / | _ | / | _ | _ | _ | _ | D | D | M | M | Y | Y | Y | Y | (DK = 99/99/9999) |  |  |  |  |  |  |  |
| _                 | /                                                                                                                                                                                                                                  | _                                                                                                                                                                                                                                                                                                                                                                                                                                                                                                                                                                                                                                                                                          | /                                                                                                                                                                                                                                                                                                                                                                      | _ | _ | _ | _ |   |   |   |   |   |   |   |   |   |   |   |   |                   |  |  |  |  |  |  |  |
| D                 | D                                                                                                                                                                                                                                  | M                                                                                                                                                                                                                                                                                                                                                                                                                                                                                                                                                                                                                                                                                          | M                                                                                                                                                                                                                                                                                                                                                                      | Y | Y | Y | Y |   |   |   |   |   |   |   |   |   |   |   |   |                   |  |  |  |  |  |  |  |
| (DK = 99/99/9999) |                                                                                                                                                                                                                                    |                                                                                                                                                                                                                                                                                                                                                                                                                                                                                                                                                                                                                                                                                            |                                                                                                                                                                                                                                                                                                                                                                        |   |   |   |   |   |   |   |   |   |   |   |   |   |   |   |   |                   |  |  |  |  |  |  |  |
| G1.5              | Date of death of the deceased<br><i>[Copy the day, month and year of death of the deceased]</i>                                                                                                                                    | <table style="margin: auto;"> <tr> <td style="border: none;">_</td><td style="border: none;">/</td><td style="border: none;">_</td><td style="border: none;">/</td><td style="border: none;">_</td><td style="border: none;">_</td><td style="border: none;">_</td><td style="border: none;">_</td> </tr> <tr> <td style="border: none;">D</td><td style="border: none;">D</td><td style="border: none;">M</td><td style="border: none;">M</td><td style="border: none;">Y</td><td style="border: none;">Y</td><td style="border: none;">Y</td><td style="border: none;">Y</td> </tr> <tr> <td colspan="8" style="border: none; text-align: center;">(DK = 99/99/9999)</td> </tr> </table> |                                                                                                                                                                                                                                                                                                                                                                        | _ | / | _ | / | _ | _ | _ | _ | D | D | M | M | Y | Y | Y | Y | (DK = 99/99/9999) |  |  |  |  |  |  |  |
| _                 | /                                                                                                                                                                                                                                  | _                                                                                                                                                                                                                                                                                                                                                                                                                                                                                                                                                                                                                                                                                          | /                                                                                                                                                                                                                                                                                                                                                                      | _ | _ | _ | _ |   |   |   |   |   |   |   |   |   |   |   |   |                   |  |  |  |  |  |  |  |
| D                 | D                                                                                                                                                                                                                                  | M                                                                                                                                                                                                                                                                                                                                                                                                                                                                                                                                                                                                                                                                                          | M                                                                                                                                                                                                                                                                                                                                                                      | Y | Y | Y | Y |   |   |   |   |   |   |   |   |   |   |   |   |                   |  |  |  |  |  |  |  |
| (DK = 99/99/9999) |                                                                                                                                                                                                                                    |                                                                                                                                                                                                                                                                                                                                                                                                                                                                                                                                                                                                                                                                                            |                                                                                                                                                                                                                                                                                                                                                                        |   |   |   |   |   |   |   |   |   |   |   |   |   |   |   |   |                   |  |  |  |  |  |  |  |
| G1.6              | Last known age of the deceased<br><i>[Copy the last known age of the deceased: Record days if less than 28 days—if less than 24 hours, record "00" days; Record months if 28 days-11 months; Record years if 1 year or older.]</i> | _____ Days: <b>1 or more</b> → <b>GQ1.7</b><br>(DK = 99)                                                                                                                                                                                                                                                                                                                                                                                                                                                                                                                                                                                                                                   |                                                                                                                                                                                                                                                                                                                                                                        |   |   |   |   |   |   |   |   |   |   |   |   |   |   |   |   |                   |  |  |  |  |  |  |  |
|                   |                                                                                                                                                                                                                                    | _____ Months → <b>GQ1.7</b><br>(DK = 99)                                                                                                                                                                                                                                                                                                                                                                                                                                                                                                                                                                                                                                                   |                                                                                                                                                                                                                                                                                                                                                                        |   |   |   |   |   |   |   |   |   |   |   |   |   |   |   |   |                   |  |  |  |  |  |  |  |
|                   |                                                                                                                                                                                                                                    | _____ Years → <b>GQ1.7</b><br>(DK = 99)                                                                                                                                                                                                                                                                                                                                                                                                                                                                                                                                                                                                                                                    |                                                                                                                                                                                                                                                                                                                                                                        |   |   |   |   |   |   |   |   |   |   |   |   |   |   |   |   |                   |  |  |  |  |  |  |  |
| G1.6.1            | Was this a stillbirth or neonatal death?<br><i>[Copy this information from the record]</i>                                                                                                                                         | 1. Stillbirth<br>2. Neonatal death<br>9. Not known from the record                                                                                                                                                                                                                                                                                                                                                                                                                                                                                                                                                                                                                         | <input type="checkbox"/>                                                                                                                                                                                                                                                                                                                                               |   |   |   |   |   |   |   |   |   |   |   |   |   |   |   |   |                   |  |  |  |  |  |  |  |
| G1.7              | Name of mother<br><i>[Copy the name of the mother]</i>                                                                                                                                                                             |                                                                                                                                                                                                                                                                                                                                                                                                                                                                                                                                                                                                                                                                                            |                                                                                                                                                                                                                                                                                                                                                                        |   |   |   |   |   |   |   |   |   |   |   |   |   |   |   |   |                   |  |  |  |  |  |  |  |
| G1.8              | Name of father<br><i>[Copy the name of the father]</i>                                                                                                                                                                             |                                                                                                                                                                                                                                                                                                                                                                                                                                                                                                                                                                                                                                                                                            |                                                                                                                                                                                                                                                                                                                                                                        |   |   |   |   |   |   |   |   |   |   |   |   |   |   |   |   |                   |  |  |  |  |  |  |  |

Study ID#

|                 |  |  |  |    |  |       |  |  |  |
|-----------------|--|--|--|----|--|-------|--|--|--|
|                 |  |  |  |    |  |       |  |  |  |
| Village/Cluster |  |  |  | HH |  | Child |  |  |  |

**CHILD HEALTH EPIDEMIOLOGY REFERENCE GROUP  
SB/NN/CHILD VERBAL/SOCIAL AUTOPSY QUESTIONNAIRE**

**Section 2: Background about the interview**

*Interviewer: Before and after the interview, fill in this section. These questions should not be asked of the respondent.*

|        |                                                                                                                                                                                                                                                                                                                                                                                                                                                                                                                                                                                                                                                                                         |                                                                                                                                                                                                                                |                                                                                                                              |   |   |   |   |   |   |   |   |   |   |   |   |   |   |   |                                             |
|--------|-----------------------------------------------------------------------------------------------------------------------------------------------------------------------------------------------------------------------------------------------------------------------------------------------------------------------------------------------------------------------------------------------------------------------------------------------------------------------------------------------------------------------------------------------------------------------------------------------------------------------------------------------------------------------------------------|--------------------------------------------------------------------------------------------------------------------------------------------------------------------------------------------------------------------------------|------------------------------------------------------------------------------------------------------------------------------|---|---|---|---|---|---|---|---|---|---|---|---|---|---|---|---------------------------------------------|
| G2.1   | Language of the interview                                                                                                                                                                                                                                                                                                                                                                                                                                                                                                                                                                                                                                                               |                                                                                                                                                                                                                                |                                                                                                                              |   |   |   |   |   |   |   |   |   |   |   |   |   |   |   |                                             |
| G2.2   | Interviewer name and ID number                                                                                                                                                                                                                                                                                                                                                                                                                                                                                                                                                                                                                                                          |                                                                                                                                                                                                                                | <input type="checkbox"/> <input type="checkbox"/> <input type="checkbox"/> <input type="checkbox"/> <input type="checkbox"/> |   |   |   |   |   |   |   |   |   |   |   |   |   |   |   |                                             |
| G2.3   | Dates of attempted and successful interviews                                                                                                                                                                                                                                                                                                                                                                                                                                                                                                                                                                                                                                            | <b>DATE</b>                                                                                                                                                                                                                    | <b>RESULT OF THE INTERVIEW</b>                                                                                               |   |   |   |   |   |   |   |   |   |   |   |   |   |   |   |                                             |
| G2.3.1 | Date of first interview attempt                                                                                                                                                                                                                                                                                                                                                                                                                                                                                                                                                                                                                                                         | <table style="margin: auto;"> <tr> <td>—</td><td>/</td><td>—</td><td>/</td><td>—</td><td>—</td><td>—</td><td>—</td> </tr> <tr> <td>D</td><td>D</td><td>M</td><td>M</td><td>Y</td><td>Y</td><td>Y</td><td>Y</td> </tr> </table> | —                                                                                                                            | / | — | / | — | — | — | — | D | D | M | M | Y | Y | Y | Y | Interim result:<br><input type="checkbox"/> |
| —      | /                                                                                                                                                                                                                                                                                                                                                                                                                                                                                                                                                                                                                                                                                       | —                                                                                                                                                                                                                              | /                                                                                                                            | — | — | — | — |   |   |   |   |   |   |   |   |   |   |   |                                             |
| D      | D                                                                                                                                                                                                                                                                                                                                                                                                                                                                                                                                                                                                                                                                                       | M                                                                                                                                                                                                                              | M                                                                                                                            | Y | Y | Y | Y |   |   |   |   |   |   |   |   |   |   |   |                                             |
| G2.3.2 | Date of second interview attempt                                                                                                                                                                                                                                                                                                                                                                                                                                                                                                                                                                                                                                                        | <table style="margin: auto;"> <tr> <td>—</td><td>/</td><td>—</td><td>/</td><td>—</td><td>—</td><td>—</td><td>—</td> </tr> <tr> <td>D</td><td>D</td><td>M</td><td>M</td><td>Y</td><td>Y</td><td>Y</td><td>Y</td> </tr> </table> | —                                                                                                                            | / | — | / | — | — | — | — | D | D | M | M | Y | Y | Y | Y | Interim result:<br><input type="checkbox"/> |
| —      | /                                                                                                                                                                                                                                                                                                                                                                                                                                                                                                                                                                                                                                                                                       | —                                                                                                                                                                                                                              | /                                                                                                                            | — | — | — | — |   |   |   |   |   |   |   |   |   |   |   |                                             |
| D      | D                                                                                                                                                                                                                                                                                                                                                                                                                                                                                                                                                                                                                                                                                       | M                                                                                                                                                                                                                              | M                                                                                                                            | Y | Y | Y | Y |   |   |   |   |   |   |   |   |   |   |   |                                             |
| G2.3.3 | Date of third interview attempt                                                                                                                                                                                                                                                                                                                                                                                                                                                                                                                                                                                                                                                         | <table style="margin: auto;"> <tr> <td>—</td><td>/</td><td>—</td><td>/</td><td>—</td><td>—</td><td>—</td><td>—</td> </tr> <tr> <td>D</td><td>D</td><td>M</td><td>M</td><td>Y</td><td>Y</td><td>Y</td><td>Y</td> </tr> </table> | —                                                                                                                            | / | — | / | — | — | — | — | D | D | M | M | Y | Y | Y | Y | Interim result:<br><input type="checkbox"/> |
| —      | /                                                                                                                                                                                                                                                                                                                                                                                                                                                                                                                                                                                                                                                                                       | —                                                                                                                                                                                                                              | /                                                                                                                            | — | — | — | — |   |   |   |   |   |   |   |   |   |   |   |                                             |
| D      | D                                                                                                                                                                                                                                                                                                                                                                                                                                                                                                                                                                                                                                                                                       | M                                                                                                                                                                                                                              | M                                                                                                                            | Y | Y | Y | Y |   |   |   |   |   |   |   |   |   |   |   |                                             |
| G2.4   | Date interview started<br><i>[Equals date of the last attempt]</i>                                                                                                                                                                                                                                                                                                                                                                                                                                                                                                                                                                                                                      | <table style="margin: auto;"> <tr> <td>—</td><td>/</td><td>—</td><td>/</td><td>—</td><td>—</td><td>—</td><td>—</td> </tr> <tr> <td>D</td><td>D</td><td>M</td><td>M</td><td>Y</td><td>Y</td><td>Y</td><td>Y</td> </tr> </table> | —                                                                                                                            | / | — | / | — | — | — | — | D | D | M | M | Y | Y | Y | Y |                                             |
| —      | /                                                                                                                                                                                                                                                                                                                                                                                                                                                                                                                                                                                                                                                                                       | —                                                                                                                                                                                                                              | /                                                                                                                            | — | — | — | — |   |   |   |   |   |   |   |   |   |   |   |                                             |
| D      | D                                                                                                                                                                                                                                                                                                                                                                                                                                                                                                                                                                                                                                                                                       | M                                                                                                                                                                                                                              | M                                                                                                                            | Y | Y | Y | Y |   |   |   |   |   |   |   |   |   |   |   |                                             |
| G2.5   | Time interview started<br><i>[Record hour 1-24 / minutes 1-60]</i>                                                                                                                                                                                                                                                                                                                                                                                                                                                                                                                                                                                                                      | <table style="margin: auto;"> <tr> <td>—</td><td>/</td><td>—</td><td>—</td> </tr> <tr> <td>H</td><td>R</td><td>M</td><td>M</td> </tr> </table>                                                                                 | —                                                                                                                            | / | — | — | H | R | M | M |   |   |   |   |   |   |   |   |                                             |
| —      | /                                                                                                                                                                                                                                                                                                                                                                                                                                                                                                                                                                                                                                                                                       | —                                                                                                                                                                                                                              | —                                                                                                                            |   |   |   |   |   |   |   |   |   |   |   |   |   |   |   |                                             |
| H      | R                                                                                                                                                                                                                                                                                                                                                                                                                                                                                                                                                                                                                                                                                       | M                                                                                                                                                                                                                              | M                                                                                                                            |   |   |   |   |   |   |   |   |   |   |   |   |   |   |   |                                             |
| G2.6   | Date interview finished<br><i>[Equals date started or a later date]</i>                                                                                                                                                                                                                                                                                                                                                                                                                                                                                                                                                                                                                 | <table style="margin: auto;"> <tr> <td>—</td><td>/</td><td>—</td><td>/</td><td>—</td><td>—</td><td>—</td><td>—</td> </tr> <tr> <td>D</td><td>D</td><td>M</td><td>M</td><td>Y</td><td>Y</td><td>Y</td><td>Y</td> </tr> </table> | —                                                                                                                            | / | — | / | — | — | — | — | D | D | M | M | Y | Y | Y | Y | Final result:<br><input type="checkbox"/>   |
| —      | /                                                                                                                                                                                                                                                                                                                                                                                                                                                                                                                                                                                                                                                                                       | —                                                                                                                                                                                                                              | /                                                                                                                            | — | — | — | — |   |   |   |   |   |   |   |   |   |   |   |                                             |
| D      | D                                                                                                                                                                                                                                                                                                                                                                                                                                                                                                                                                                                                                                                                                       | M                                                                                                                                                                                                                              | M                                                                                                                            | Y | Y | Y | Y |   |   |   |   |   |   |   |   |   |   |   |                                             |
| G2.7   | Time interview finished<br><i>[Record hour 1-24 / minutes 1-60]</i>                                                                                                                                                                                                                                                                                                                                                                                                                                                                                                                                                                                                                     | <table style="margin: auto;"> <tr> <td>—</td><td>/</td><td>—</td><td>—</td> </tr> <tr> <td>H</td><td>R</td><td>M</td><td>M</td> </tr> </table>                                                                                 | —                                                                                                                            | / | — | — | H | R | M | M |   |   |   |   |   |   |   |   |                                             |
| —      | /                                                                                                                                                                                                                                                                                                                                                                                                                                                                                                                                                                                                                                                                                       | —                                                                                                                                                                                                                              | —                                                                                                                            |   |   |   |   |   |   |   |   |   |   |   |   |   |   |   |                                             |
| H      | R                                                                                                                                                                                                                                                                                                                                                                                                                                                                                                                                                                                                                                                                                       | M                                                                                                                                                                                                                              | M                                                                                                                            |   |   |   |   |   |   |   |   |   |   |   |   |   |   |   |                                             |
|        | <p><b>Interview result codes:</b></p> <ol style="list-style-type: none"> <li>1. Completed (Final result code)</li> <li>2. Partially completed (Final result code)</li> <li>3. Eligible respondent postponed interview</li> <li>4. No eligible respondent at home at time of visit</li> <li>5. Eligible respondent refused interview</li> <li>6. No eligible respondent lives in household</li> <li>7. No household member at home</li> <li>8. Dwelling vacant / destroyed / not found</li> <li>9. In progress (Interim result code)</li> <li>10. Child reported dead in birth history is actually alive</li> <li>11. Duplicate report of death – interview already conducted</li> </ol> |                                                                                                                                                                                                                                |                                                                                                                              |   |   |   |   |   |   |   |   |   |   |   |   |   |   |   |                                             |
| G2.8   | Date form checked by supervisor                                                                                                                                                                                                                                                                                                                                                                                                                                                                                                                                                                                                                                                         | <table style="margin: auto;"> <tr> <td>—</td><td>/</td><td>—</td><td>/</td><td>—</td><td>—</td><td>—</td><td>—</td> </tr> <tr> <td>D</td><td>D</td><td>M</td><td>M</td><td>Y</td><td>Y</td><td>Y</td><td>Y</td> </tr> </table> | —                                                                                                                            | / | — | / | — | — | — | — | D | D | M | M | Y | Y | Y | Y |                                             |
| —      | /                                                                                                                                                                                                                                                                                                                                                                                                                                                                                                                                                                                                                                                                                       | —                                                                                                                                                                                                                              | /                                                                                                                            | — | — | — | — |   |   |   |   |   |   |   |   |   |   |   |                                             |
| D      | D                                                                                                                                                                                                                                                                                                                                                                                                                                                                                                                                                                                                                                                                                       | M                                                                                                                                                                                                                              | M                                                                                                                            | Y | Y | Y | Y |   |   |   |   |   |   |   |   |   |   |   |                                             |
| G2.9   | Date entered in computer                                                                                                                                                                                                                                                                                                                                                                                                                                                                                                                                                                                                                                                                | <table style="margin: auto;"> <tr> <td>—</td><td>/</td><td>—</td><td>/</td><td>—</td><td>—</td><td>—</td><td>—</td> </tr> <tr> <td>D</td><td>D</td><td>M</td><td>M</td><td>Y</td><td>Y</td><td>Y</td><td>Y</td> </tr> </table> | —                                                                                                                            | / | — | / | — | — | — | — | D | D | M | M | Y | Y | Y | Y |                                             |
| —      | /                                                                                                                                                                                                                                                                                                                                                                                                                                                                                                                                                                                                                                                                                       | —                                                                                                                                                                                                                              | /                                                                                                                            | — | — | — | — |   |   |   |   |   |   |   |   |   |   |   |                                             |
| D      | D                                                                                                                                                                                                                                                                                                                                                                                                                                                                                                                                                                                                                                                                                       | M                                                                                                                                                                                                                              | M                                                                                                                            | Y | Y | Y | Y |   |   |   |   |   |   |   |   |   |   |   |                                             |

**INTERVIEW BEGINS**

*Instructions to interviewer: Introduce yourself and explain the purpose of your visit. Ask to speak to the mother or to another adult who was the deceased's main caregiver during the illness that led to death. If this is not possible, arrange a time to revisit the household when the caregiver will be home. (See example below.)*

"My name is [your name]. I am an interviewer with the \_\_\_\_\_ project. I have been informed that a child death has occurred in your household. I am very sorry to hear this. Please accept my sympathies. For the purpose of improving health care, we are collecting information on recent child deaths in this area. I would like to talk to the mother or main caregiver of <NAME> and ask some questions about the events and any symptoms that <NAME> had during her/his illness before death."

**Section 3: Consent**

**INTERVIEWER: Read the consent form to the respondent. Ask the respondent if he or she has any questions. Once any questions are answered, ask the respondent if he or she is willing to take part in the study.**

|      |                                                  |                 |                                                                                            |
|------|--------------------------------------------------|-----------------|--------------------------------------------------------------------------------------------|
| G3.1 | <i>INTERVIEWER: Did respondent give consent?</i> | 1. Yes<br>2. No | <input type="checkbox"/> 2 → <b>Thank respondent for their time and end the interview.</b> |
|------|--------------------------------------------------|-----------------|--------------------------------------------------------------------------------------------|

**Section 4: Information about the respondent**

*Read: I would now like to ask you some general questions about yourself.*

|        |                                                                                                                                                                                               |                                                                                                                                                                                                                                                        |                                                                                  |
|--------|-----------------------------------------------------------------------------------------------------------------------------------------------------------------------------------------------|--------------------------------------------------------------------------------------------------------------------------------------------------------------------------------------------------------------------------------------------------------|----------------------------------------------------------------------------------|
| G4.1   | What is your (the respondent's) name?                                                                                                                                                         |                                                                                                                                                                                                                                                        |                                                                                  |
| G4.2   | <i>INTERVIEWER: What is the sex of the respondent?</i>                                                                                                                                        | 1. Male<br>2. Female                                                                                                                                                                                                                                   | <input type="checkbox"/>                                                         |
| G4.3   | What is your relationship to the deceased child?                                                                                                                                              | 1. Mother<br>2. Father<br>3. Grandmother<br>4. Grandfather<br>5. Aunt<br>6. Uncle<br>7. Brother<br>8. Sister<br>9. Birth attendant ( <i>specify type</i> ) .....<br>10. Other male ( <i>specify</i> ).....<br>11. Other female ( <i>specify</i> )..... | <input type="checkbox"/> <input type="checkbox"/><br><br>_____<br>_____<br>_____ |
| G4.4   | How old are you?                                                                                                                                                                              | ____ Years<br>(DK = 99)                                                                                                                                                                                                                                |                                                                                  |
| G4.5   | Starting with the first year of primary school, how many years of school did you complete?                                                                                                    | ____ Years <b>&gt;6 years</b><br>(<1 = 00; DK = 99) → <b>GQ4.6</b>                                                                                                                                                                                     |                                                                                  |
| G4.5.1 | Now I would like you to read this sentence to me. ( <i>Show card to respondent</i> )<br><br><i>If she cannot read the whole sentence, probe: Can you read any part of the sentence to me?</i> | 1. Cannot read at all<br>2. Able to read only part of sentence<br>3. Able to read whole sentence<br>4. No card available to show mother                                                                                                                | <input type="checkbox"/>                                                         |

*Read: I would now like to ask you some questions about (your / the family's) household. Please remember that all information will be kept confidential.*

*[Read "...the family's household." if you are not conducting the interview at the household where the death was identified.]*

|      |                                                                                                                                              |                                                                  |
|------|----------------------------------------------------------------------------------------------------------------------------------------------|------------------------------------------------------------------|
| G4.6 | How many people live at (this / that) household?<br><br><i>[Read "...at that address?" if you are speaking of "the family's household."]</i> | ____ People<br>(DK = 99)                                         |
| G4.7 | How many sleeping rooms are in the household?                                                                                                | ____ Rooms<br>(DK = 99)                                          |
| G4.8 | Does the household have a separate room for cooking?                                                                                         | 1. Yes<br>2. No<br>9. Don't know<br><br><input type="checkbox"/> |

Study ID#

|                 |  |  |  |    |  |       |  |  |  |
|-----------------|--|--|--|----|--|-------|--|--|--|
|                 |  |  |  |    |  |       |  |  |  |
| Village/Cluster |  |  |  | HH |  | Child |  |  |  |

**CHILD HEALTH EPIDEMIOLOGY REFERENCE GROUP  
SB/NN/CHILD VERBAL/SOCIAL AUTOPSY QUESTIONNAIRE**

|                             |                                                                                                                                                                                    |                                                                                                                                                                                                                                                                                                                                                                                                                                                                                                                                                                                                                                                           |                                                                                                                                                                                                                                                                                                                                                                                                                                                                                                                                                                                                                                                                                                                                                                                                                                                                                                                                                                                                                                                                                                                                                                                                                                                                                                                                                                                                                                                                                                                                                                                                                                                                                                                                                                                                                                        |            |           |           |                             |                             |                             |                             |                             |                             |                             |                             |                             |                             |                             |                             |                             |                             |                             |                             |                             |                             |                             |                             |                             |                             |                             |                             |                             |                             |                             |                             |                             |                             |                             |                             |                             |                             |                             |                             |                             |                             |                             |
|-----------------------------|------------------------------------------------------------------------------------------------------------------------------------------------------------------------------------|-----------------------------------------------------------------------------------------------------------------------------------------------------------------------------------------------------------------------------------------------------------------------------------------------------------------------------------------------------------------------------------------------------------------------------------------------------------------------------------------------------------------------------------------------------------------------------------------------------------------------------------------------------------|----------------------------------------------------------------------------------------------------------------------------------------------------------------------------------------------------------------------------------------------------------------------------------------------------------------------------------------------------------------------------------------------------------------------------------------------------------------------------------------------------------------------------------------------------------------------------------------------------------------------------------------------------------------------------------------------------------------------------------------------------------------------------------------------------------------------------------------------------------------------------------------------------------------------------------------------------------------------------------------------------------------------------------------------------------------------------------------------------------------------------------------------------------------------------------------------------------------------------------------------------------------------------------------------------------------------------------------------------------------------------------------------------------------------------------------------------------------------------------------------------------------------------------------------------------------------------------------------------------------------------------------------------------------------------------------------------------------------------------------------------------------------------------------------------------------------------------------|------------|-----------|-----------|-----------------------------|-----------------------------|-----------------------------|-----------------------------|-----------------------------|-----------------------------|-----------------------------|-----------------------------|-----------------------------|-----------------------------|-----------------------------|-----------------------------|-----------------------------|-----------------------------|-----------------------------|-----------------------------|-----------------------------|-----------------------------|-----------------------------|-----------------------------|-----------------------------|-----------------------------|-----------------------------|-----------------------------|-----------------------------|-----------------------------|-----------------------------|-----------------------------|-----------------------------|-----------------------------|-----------------------------|-----------------------------|-----------------------------|-----------------------------|-----------------------------|-----------------------------|-----------------------------|-----------------------------|-----------------------------|
| G4.9                        | <p>Does the household have:</p> <p><i>[Ask about each possession, and mark each one "Yes," "No" or "Don't know."]</i></p>                                                          | <p><u>Does the household have:</u></p> <p>1. electricity?.....</p> <p>2. a radio?.....</p> <p>3. a television?.....</p> <p>4. a refrigerator?.....</p> <p>5. a fixed line telephone?.....</p> <p><u>Does it have:</u></p> <p>6. a mobile telephone? .....</p> <p>7. a computer?.....</p> <p>8. a bicycle?.....</p> <p>9. a car or truck?.....</p> <p><u>Does the household have:</u></p> <p>10.piped water inside the residence? .....</p> <p>11.piped water outside the residence? .....</p> <p>12.a well (protected or unprotected)? .....</p> <p>13.a water vendor, water supplied by truck or bottled water? .....</p> <p>14.surface water? .....</p> | <table border="0"> <tr> <td style="text-align: center;"><u>Yes</u></td> <td style="text-align: center;"><u>No</u></td> <td style="text-align: center;"><u>DK</u></td> </tr> <tr> <td>1. <input type="checkbox"/></td> <td>2. <input type="checkbox"/></td> <td>9. <input type="checkbox"/></td> </tr> <tr> <td>1. <input type="checkbox"/></td> <td>2. <input type="checkbox"/></td> <td>9. <input type="checkbox"/></td> </tr> <tr> <td>1. <input type="checkbox"/></td> <td>2. <input type="checkbox"/></td> <td>9. <input type="checkbox"/></td> </tr> <tr> <td>1. <input type="checkbox"/></td> <td>2. <input type="checkbox"/></td> <td>9. <input type="checkbox"/></td> </tr> <tr> <td>1. <input type="checkbox"/></td> <td>2. <input type="checkbox"/></td> <td>9. <input type="checkbox"/></td> </tr> <tr> <td>1. <input type="checkbox"/></td> <td>2. <input type="checkbox"/></td> <td>9. <input type="checkbox"/></td> </tr> <tr> <td>1. <input type="checkbox"/></td> <td>2. <input type="checkbox"/></td> <td>9. <input type="checkbox"/></td> </tr> <tr> <td>1. <input type="checkbox"/></td> <td>2. <input type="checkbox"/></td> <td>9. <input type="checkbox"/></td> </tr> <tr> <td>1. <input type="checkbox"/></td> <td>2. <input type="checkbox"/></td> <td>9. <input type="checkbox"/></td> </tr> <tr> <td>1. <input type="checkbox"/></td> <td>2. <input type="checkbox"/></td> <td>9. <input type="checkbox"/></td> </tr> <tr> <td>1. <input type="checkbox"/></td> <td>2. <input type="checkbox"/></td> <td>9. <input type="checkbox"/></td> </tr> <tr> <td>1. <input type="checkbox"/></td> <td>2. <input type="checkbox"/></td> <td>9. <input type="checkbox"/></td> </tr> <tr> <td>1. <input type="checkbox"/></td> <td>2. <input type="checkbox"/></td> <td>9. <input type="checkbox"/></td> </tr> </table> | <u>Yes</u> | <u>No</u> | <u>DK</u> | 1. <input type="checkbox"/> | 2. <input type="checkbox"/> | 9. <input type="checkbox"/> | 1. <input type="checkbox"/> | 2. <input type="checkbox"/> | 9. <input type="checkbox"/> | 1. <input type="checkbox"/> | 2. <input type="checkbox"/> | 9. <input type="checkbox"/> | 1. <input type="checkbox"/> | 2. <input type="checkbox"/> | 9. <input type="checkbox"/> | 1. <input type="checkbox"/> | 2. <input type="checkbox"/> | 9. <input type="checkbox"/> | 1. <input type="checkbox"/> | 2. <input type="checkbox"/> | 9. <input type="checkbox"/> | 1. <input type="checkbox"/> | 2. <input type="checkbox"/> | 9. <input type="checkbox"/> | 1. <input type="checkbox"/> | 2. <input type="checkbox"/> | 9. <input type="checkbox"/> | 1. <input type="checkbox"/> | 2. <input type="checkbox"/> | 9. <input type="checkbox"/> | 1. <input type="checkbox"/> | 2. <input type="checkbox"/> | 9. <input type="checkbox"/> | 1. <input type="checkbox"/> | 2. <input type="checkbox"/> | 9. <input type="checkbox"/> | 1. <input type="checkbox"/> | 2. <input type="checkbox"/> | 9. <input type="checkbox"/> | 1. <input type="checkbox"/> | 2. <input type="checkbox"/> | 9. <input type="checkbox"/> |
| <u>Yes</u>                  | <u>No</u>                                                                                                                                                                          | <u>DK</u>                                                                                                                                                                                                                                                                                                                                                                                                                                                                                                                                                                                                                                                 |                                                                                                                                                                                                                                                                                                                                                                                                                                                                                                                                                                                                                                                                                                                                                                                                                                                                                                                                                                                                                                                                                                                                                                                                                                                                                                                                                                                                                                                                                                                                                                                                                                                                                                                                                                                                                                        |            |           |           |                             |                             |                             |                             |                             |                             |                             |                             |                             |                             |                             |                             |                             |                             |                             |                             |                             |                             |                             |                             |                             |                             |                             |                             |                             |                             |                             |                             |                             |                             |                             |                             |                             |                             |                             |                             |                             |                             |                             |
| 1. <input type="checkbox"/> | 2. <input type="checkbox"/>                                                                                                                                                        | 9. <input type="checkbox"/>                                                                                                                                                                                                                                                                                                                                                                                                                                                                                                                                                                                                                               |                                                                                                                                                                                                                                                                                                                                                                                                                                                                                                                                                                                                                                                                                                                                                                                                                                                                                                                                                                                                                                                                                                                                                                                                                                                                                                                                                                                                                                                                                                                                                                                                                                                                                                                                                                                                                                        |            |           |           |                             |                             |                             |                             |                             |                             |                             |                             |                             |                             |                             |                             |                             |                             |                             |                             |                             |                             |                             |                             |                             |                             |                             |                             |                             |                             |                             |                             |                             |                             |                             |                             |                             |                             |                             |                             |                             |                             |                             |
| 1. <input type="checkbox"/> | 2. <input type="checkbox"/>                                                                                                                                                        | 9. <input type="checkbox"/>                                                                                                                                                                                                                                                                                                                                                                                                                                                                                                                                                                                                                               |                                                                                                                                                                                                                                                                                                                                                                                                                                                                                                                                                                                                                                                                                                                                                                                                                                                                                                                                                                                                                                                                                                                                                                                                                                                                                                                                                                                                                                                                                                                                                                                                                                                                                                                                                                                                                                        |            |           |           |                             |                             |                             |                             |                             |                             |                             |                             |                             |                             |                             |                             |                             |                             |                             |                             |                             |                             |                             |                             |                             |                             |                             |                             |                             |                             |                             |                             |                             |                             |                             |                             |                             |                             |                             |                             |                             |                             |                             |
| 1. <input type="checkbox"/> | 2. <input type="checkbox"/>                                                                                                                                                        | 9. <input type="checkbox"/>                                                                                                                                                                                                                                                                                                                                                                                                                                                                                                                                                                                                                               |                                                                                                                                                                                                                                                                                                                                                                                                                                                                                                                                                                                                                                                                                                                                                                                                                                                                                                                                                                                                                                                                                                                                                                                                                                                                                                                                                                                                                                                                                                                                                                                                                                                                                                                                                                                                                                        |            |           |           |                             |                             |                             |                             |                             |                             |                             |                             |                             |                             |                             |                             |                             |                             |                             |                             |                             |                             |                             |                             |                             |                             |                             |                             |                             |                             |                             |                             |                             |                             |                             |                             |                             |                             |                             |                             |                             |                             |                             |
| 1. <input type="checkbox"/> | 2. <input type="checkbox"/>                                                                                                                                                        | 9. <input type="checkbox"/>                                                                                                                                                                                                                                                                                                                                                                                                                                                                                                                                                                                                                               |                                                                                                                                                                                                                                                                                                                                                                                                                                                                                                                                                                                                                                                                                                                                                                                                                                                                                                                                                                                                                                                                                                                                                                                                                                                                                                                                                                                                                                                                                                                                                                                                                                                                                                                                                                                                                                        |            |           |           |                             |                             |                             |                             |                             |                             |                             |                             |                             |                             |                             |                             |                             |                             |                             |                             |                             |                             |                             |                             |                             |                             |                             |                             |                             |                             |                             |                             |                             |                             |                             |                             |                             |                             |                             |                             |                             |                             |                             |
| 1. <input type="checkbox"/> | 2. <input type="checkbox"/>                                                                                                                                                        | 9. <input type="checkbox"/>                                                                                                                                                                                                                                                                                                                                                                                                                                                                                                                                                                                                                               |                                                                                                                                                                                                                                                                                                                                                                                                                                                                                                                                                                                                                                                                                                                                                                                                                                                                                                                                                                                                                                                                                                                                                                                                                                                                                                                                                                                                                                                                                                                                                                                                                                                                                                                                                                                                                                        |            |           |           |                             |                             |                             |                             |                             |                             |                             |                             |                             |                             |                             |                             |                             |                             |                             |                             |                             |                             |                             |                             |                             |                             |                             |                             |                             |                             |                             |                             |                             |                             |                             |                             |                             |                             |                             |                             |                             |                             |                             |
| 1. <input type="checkbox"/> | 2. <input type="checkbox"/>                                                                                                                                                        | 9. <input type="checkbox"/>                                                                                                                                                                                                                                                                                                                                                                                                                                                                                                                                                                                                                               |                                                                                                                                                                                                                                                                                                                                                                                                                                                                                                                                                                                                                                                                                                                                                                                                                                                                                                                                                                                                                                                                                                                                                                                                                                                                                                                                                                                                                                                                                                                                                                                                                                                                                                                                                                                                                                        |            |           |           |                             |                             |                             |                             |                             |                             |                             |                             |                             |                             |                             |                             |                             |                             |                             |                             |                             |                             |                             |                             |                             |                             |                             |                             |                             |                             |                             |                             |                             |                             |                             |                             |                             |                             |                             |                             |                             |                             |                             |
| 1. <input type="checkbox"/> | 2. <input type="checkbox"/>                                                                                                                                                        | 9. <input type="checkbox"/>                                                                                                                                                                                                                                                                                                                                                                                                                                                                                                                                                                                                                               |                                                                                                                                                                                                                                                                                                                                                                                                                                                                                                                                                                                                                                                                                                                                                                                                                                                                                                                                                                                                                                                                                                                                                                                                                                                                                                                                                                                                                                                                                                                                                                                                                                                                                                                                                                                                                                        |            |           |           |                             |                             |                             |                             |                             |                             |                             |                             |                             |                             |                             |                             |                             |                             |                             |                             |                             |                             |                             |                             |                             |                             |                             |                             |                             |                             |                             |                             |                             |                             |                             |                             |                             |                             |                             |                             |                             |                             |                             |
| 1. <input type="checkbox"/> | 2. <input type="checkbox"/>                                                                                                                                                        | 9. <input type="checkbox"/>                                                                                                                                                                                                                                                                                                                                                                                                                                                                                                                                                                                                                               |                                                                                                                                                                                                                                                                                                                                                                                                                                                                                                                                                                                                                                                                                                                                                                                                                                                                                                                                                                                                                                                                                                                                                                                                                                                                                                                                                                                                                                                                                                                                                                                                                                                                                                                                                                                                                                        |            |           |           |                             |                             |                             |                             |                             |                             |                             |                             |                             |                             |                             |                             |                             |                             |                             |                             |                             |                             |                             |                             |                             |                             |                             |                             |                             |                             |                             |                             |                             |                             |                             |                             |                             |                             |                             |                             |                             |                             |                             |
| 1. <input type="checkbox"/> | 2. <input type="checkbox"/>                                                                                                                                                        | 9. <input type="checkbox"/>                                                                                                                                                                                                                                                                                                                                                                                                                                                                                                                                                                                                                               |                                                                                                                                                                                                                                                                                                                                                                                                                                                                                                                                                                                                                                                                                                                                                                                                                                                                                                                                                                                                                                                                                                                                                                                                                                                                                                                                                                                                                                                                                                                                                                                                                                                                                                                                                                                                                                        |            |           |           |                             |                             |                             |                             |                             |                             |                             |                             |                             |                             |                             |                             |                             |                             |                             |                             |                             |                             |                             |                             |                             |                             |                             |                             |                             |                             |                             |                             |                             |                             |                             |                             |                             |                             |                             |                             |                             |                             |                             |
| 1. <input type="checkbox"/> | 2. <input type="checkbox"/>                                                                                                                                                        | 9. <input type="checkbox"/>                                                                                                                                                                                                                                                                                                                                                                                                                                                                                                                                                                                                                               |                                                                                                                                                                                                                                                                                                                                                                                                                                                                                                                                                                                                                                                                                                                                                                                                                                                                                                                                                                                                                                                                                                                                                                                                                                                                                                                                                                                                                                                                                                                                                                                                                                                                                                                                                                                                                                        |            |           |           |                             |                             |                             |                             |                             |                             |                             |                             |                             |                             |                             |                             |                             |                             |                             |                             |                             |                             |                             |                             |                             |                             |                             |                             |                             |                             |                             |                             |                             |                             |                             |                             |                             |                             |                             |                             |                             |                             |                             |
| 1. <input type="checkbox"/> | 2. <input type="checkbox"/>                                                                                                                                                        | 9. <input type="checkbox"/>                                                                                                                                                                                                                                                                                                                                                                                                                                                                                                                                                                                                                               |                                                                                                                                                                                                                                                                                                                                                                                                                                                                                                                                                                                                                                                                                                                                                                                                                                                                                                                                                                                                                                                                                                                                                                                                                                                                                                                                                                                                                                                                                                                                                                                                                                                                                                                                                                                                                                        |            |           |           |                             |                             |                             |                             |                             |                             |                             |                             |                             |                             |                             |                             |                             |                             |                             |                             |                             |                             |                             |                             |                             |                             |                             |                             |                             |                             |                             |                             |                             |                             |                             |                             |                             |                             |                             |                             |                             |                             |                             |
| 1. <input type="checkbox"/> | 2. <input type="checkbox"/>                                                                                                                                                        | 9. <input type="checkbox"/>                                                                                                                                                                                                                                                                                                                                                                                                                                                                                                                                                                                                                               |                                                                                                                                                                                                                                                                                                                                                                                                                                                                                                                                                                                                                                                                                                                                                                                                                                                                                                                                                                                                                                                                                                                                                                                                                                                                                                                                                                                                                                                                                                                                                                                                                                                                                                                                                                                                                                        |            |           |           |                             |                             |                             |                             |                             |                             |                             |                             |                             |                             |                             |                             |                             |                             |                             |                             |                             |                             |                             |                             |                             |                             |                             |                             |                             |                             |                             |                             |                             |                             |                             |                             |                             |                             |                             |                             |                             |                             |                             |
| 1. <input type="checkbox"/> | 2. <input type="checkbox"/>                                                                                                                                                        | 9. <input type="checkbox"/>                                                                                                                                                                                                                                                                                                                                                                                                                                                                                                                                                                                                                               |                                                                                                                                                                                                                                                                                                                                                                                                                                                                                                                                                                                                                                                                                                                                                                                                                                                                                                                                                                                                                                                                                                                                                                                                                                                                                                                                                                                                                                                                                                                                                                                                                                                                                                                                                                                                                                        |            |           |           |                             |                             |                             |                             |                             |                             |                             |                             |                             |                             |                             |                             |                             |                             |                             |                             |                             |                             |                             |                             |                             |                             |                             |                             |                             |                             |                             |                             |                             |                             |                             |                             |                             |                             |                             |                             |                             |                             |                             |
| G4.10                       | <p>What type of toilet does the household have?</p>                                                                                                                                | <p>1. Flush toilet</p> <p>2. Improved pit toilet</p> <p>3. Traditional pit toilet</p> <p>4. Bush/field/beach</p> <p>5. Other (<i>specify</i>).....</p> <p>9. Don't know</p>                                                                                                                                                                                                                                                                                                                                                                                                                                                                               | <p style="text-align: center;"><input type="checkbox"/></p> <hr/>                                                                                                                                                                                                                                                                                                                                                                                                                                                                                                                                                                                                                                                                                                                                                                                                                                                                                                                                                                                                                                                                                                                                                                                                                                                                                                                                                                                                                                                                                                                                                                                                                                                                                                                                                                      |            |           |           |                             |                             |                             |                             |                             |                             |                             |                             |                             |                             |                             |                             |                             |                             |                             |                             |                             |                             |                             |                             |                             |                             |                             |                             |                             |                             |                             |                             |                             |                             |                             |                             |                             |                             |                             |                             |                             |                             |                             |
| G4.11                       | <p>What is the main kind of energy the household uses for cooking?</p>                                                                                                             | <p>1. Charcoal</p> <p>2. Firewood</p> <p>3. Kerosene</p> <p>4. Electricity</p> <p>5. Gas</p> <p>6. Cow dung</p> <p>7. Other (<i>specify</i>).....</p> <p>9. Don't know</p>                                                                                                                                                                                                                                                                                                                                                                                                                                                                                | <p style="text-align: center;"><input type="checkbox"/></p> <hr/>                                                                                                                                                                                                                                                                                                                                                                                                                                                                                                                                                                                                                                                                                                                                                                                                                                                                                                                                                                                                                                                                                                                                                                                                                                                                                                                                                                                                                                                                                                                                                                                                                                                                                                                                                                      |            |           |           |                             |                             |                             |                             |                             |                             |                             |                             |                             |                             |                             |                             |                             |                             |                             |                             |                             |                             |                             |                             |                             |                             |                             |                             |                             |                             |                             |                             |                             |                             |                             |                             |                             |                             |                             |                             |                             |                             |                             |
| G4.12                       | <p>What is the main material used for the floor of the house?</p> <p><i>[If you are able to observe the floor, then mark the correct answer and do not ask this question.]</i></p> | <p>1. Natural/mud</p> <p>2. Cement</p> <p>3. Wood</p> <p>4. Tiles</p> <p>5. Other (<i>specify</i>).....</p> <p>9. Don't know</p>                                                                                                                                                                                                                                                                                                                                                                                                                                                                                                                          | <p style="text-align: center;"><input type="checkbox"/></p> <hr/>                                                                                                                                                                                                                                                                                                                                                                                                                                                                                                                                                                                                                                                                                                                                                                                                                                                                                                                                                                                                                                                                                                                                                                                                                                                                                                                                                                                                                                                                                                                                                                                                                                                                                                                                                                      |            |           |           |                             |                             |                             |                             |                             |                             |                             |                             |                             |                             |                             |                             |                             |                             |                             |                             |                             |                             |                             |                             |                             |                             |                             |                             |                             |                             |                             |                             |                             |                             |                             |                             |                             |                             |                             |                             |                             |                             |                             |

**Section 5: Information about others at the interview**

|      |                                                                          |                 |                                    |
|------|--------------------------------------------------------------------------|-----------------|------------------------------------|
| G5.7 | <i>INTERVIEWER: Are there other people present during the interview?</i> | 1. Yes<br>2. No | <input type="checkbox"/> 2 → GQ5.9 |
|------|--------------------------------------------------------------------------|-----------------|------------------------------------|

|      |                                                                                                      |                                |
|------|------------------------------------------------------------------------------------------------------|--------------------------------|
| G5.8 | <i>INTERVIEWER: In addition to the respondent, how many people are present during the interview?</i> | ____ Other people<br>(DK = 99) |
|------|------------------------------------------------------------------------------------------------------|--------------------------------|

G5.9 *INTERVIEWER: Mark the respondent in the below table and whether s/he was present during the child's illness and/or death. For each other person present at the interview, ask the respondent their relationship to the deceased and whether they were present during the child's illness and/or at the death. For stillbirths and neonatal deaths, also ask if each person (other than the mother) was present during the mother's pregnancy and delivery.*

|     | Relationship of person to the deceased child | Mark (X) if present at the interview | Stillbirths and neonatal deaths only            |                                            | Neonatal & older child deaths only                |                                                 |
|-----|----------------------------------------------|--------------------------------------|-------------------------------------------------|--------------------------------------------|---------------------------------------------------|-------------------------------------------------|
|     |                                              |                                      | Present during the pregnancy:<br>1. Yes / 2. No | Present at the delivery:<br>1. Yes / 2. No | Present during child's illness:<br>1. Yes / 2. No | Present at the child's death:<br>1. Yes / 2. No |
| .1  | Mother                                       | <input type="checkbox"/>             |                                                 |                                            | <input type="checkbox"/>                          | <input type="checkbox"/>                        |
| .2  | Father                                       | <input type="checkbox"/>             | <input type="checkbox"/>                        | <input type="checkbox"/>                   | <input type="checkbox"/>                          | <input type="checkbox"/>                        |
| .3  | Grandmother                                  | <input type="checkbox"/>             | <input type="checkbox"/>                        | <input type="checkbox"/>                   | <input type="checkbox"/>                          | <input type="checkbox"/>                        |
| .4  | Grandfather                                  | <input type="checkbox"/>             | <input type="checkbox"/>                        | <input type="checkbox"/>                   | <input type="checkbox"/>                          | <input type="checkbox"/>                        |
| .5  | Aunt                                         | <input type="checkbox"/>             | <input type="checkbox"/>                        | <input type="checkbox"/>                   | <input type="checkbox"/>                          | <input type="checkbox"/>                        |
| .6  | Uncle                                        | <input type="checkbox"/>             | <input type="checkbox"/>                        | <input type="checkbox"/>                   | <input type="checkbox"/>                          | <input type="checkbox"/>                        |
| .7  | Brother                                      | <input type="checkbox"/>             | <input type="checkbox"/>                        | <input type="checkbox"/>                   | <input type="checkbox"/>                          | <input type="checkbox"/>                        |
| .8  | Sister                                       | <input type="checkbox"/>             | <input type="checkbox"/>                        | <input type="checkbox"/>                   | <input type="checkbox"/>                          | <input type="checkbox"/>                        |
| .9  | Traditional birth attendant                  | <input type="checkbox"/>             | <input type="checkbox"/>                        | <input type="checkbox"/>                   | <input type="checkbox"/>                          | <input type="checkbox"/>                        |
| .10 | Other male (specify: _____)                  | <input type="checkbox"/>             | <input type="checkbox"/>                        | <input type="checkbox"/>                   | <input type="checkbox"/>                          | <input type="checkbox"/>                        |
| .11 | Other female (specify _____)                 | <input type="checkbox"/>             | <input type="checkbox"/>                        | <input type="checkbox"/>                   | <input type="checkbox"/>                          | <input type="checkbox"/>                        |

**VA Section 1: Background (FOR STILLBIRTHS, NEONATAL & CHILD DEATHS 0—59 MONTHS OLD)**

|       |                                                                                                                                                                                                                                                                                      |                                                                                                                                                            |                                                                           |
|-------|--------------------------------------------------------------------------------------------------------------------------------------------------------------------------------------------------------------------------------------------------------------------------------------|------------------------------------------------------------------------------------------------------------------------------------------------------------|---------------------------------------------------------------------------|
| V1.1  | Was the deceased a singleton or multiple birth?<br><br><i>[If two or more children are born at the same time, it is counted as a multiple birth, even if one or more of the babies are born dead.]</i>                                                                               | 1. Singleton<br>2. Multiple<br>9. Don't know                                                                                                               | <input type="checkbox"/> 1 or 9 → VQ1.3                                   |
| V1.2  | Was this the first, second, or later in the birth order?                                                                                                                                                                                                                             | 1. First<br>2. Second<br>3. Third or more<br>9. Don't know                                                                                                 | <input type="checkbox"/>                                                  |
| V1.3  | If the mother is present, mark "Yes" and do not ask this question.<br><br>Is the mother still alive?                                                                                                                                                                                 | 1. Yes<br>2. No                                                                                                                                            | <input type="checkbox"/> 1 → VQ1.6                                        |
| V1.4  | Did the mother die during or after the delivery?                                                                                                                                                                                                                                     | 1. During<br>2. After<br>9. Don't know                                                                                                                     | <input type="checkbox"/> 1 or 9 → VQ1.6                                   |
| V1.5  | How long after the delivery did the mother die?<br><br>[Record days if less than 28 days—if less than 24 hours, record "00" days; Record months if 28 days or more]                                                                                                                  |                                                                                                                                                            | ____ ____ Days<br>(DK = 99)                                               |
|       |                                                                                                                                                                                                                                                                                      |                                                                                                                                                            | ____ ____ Months<br>(DK = 99)                                             |
| V1.6  | Where was the deceased born?                                                                                                                                                                                                                                                         | 1. Hospital<br>2. Other health provider or facility<br>3. On route to a health provider or facility<br>4. Home<br>5. Other (specify).....<br>9. Don't know | <input type="checkbox"/>                                                  |
| V1.7  | At the time of the delivery was the deceased:<br><br>[Read the question and slowly read the first four choices. Respondent should hear all four choices & then respond.]<br><br>[Show photos]                                                                                        | 1. Very small<br>2. Smaller than usual<br>3. About average<br>4. Larger than usual<br>9. Don't know                                                        | <input type="checkbox"/>                                                  |
| V1.8  | What was the weight of the deceased at birth?                                                                                                                                                                                                                                        |                                                                                                                                                            | ____ ____ ____ Grams<br>(DK = 9999)                                       |
| V1.9  | What was the sex of the deceased?                                                                                                                                                                                                                                                    | 1. Male<br>2. Female<br>9. Don't know                                                                                                                      | <input type="checkbox"/>                                                  |
| V1.10 | What was the delivery date?<br><br>Compare the delivery date just stated by the respondent to the birth date from the prior record (GQ1.4). Discuss any inconsistency with the respondent to confirm or correct the stated delivery date. You cannot change the prior record's date. |                                                                                                                                                            | ____ / ____ / ____ ____ ____ ____<br>D D M M Y Y Y Y<br>(DK = 99/99/9999) |
| V1.11 | Was the child born alive or dead?                                                                                                                                                                                                                                                    | 1. Alive<br>2. Dead<br>9. Don't know                                                                                                                       | <input type="checkbox"/>                                                  |
| V1.12 | Did the baby ever cry?                                                                                                                                                                                                                                                               | 1. Yes<br>2. No<br>9. Don't know                                                                                                                           | <input type="checkbox"/>                                                  |

|       |                                                                                                                                                                                                                   |                                  |                                     |
|-------|-------------------------------------------------------------------------------------------------------------------------------------------------------------------------------------------------------------------|----------------------------------|-------------------------------------|
| V1.13 | Did the baby ever move?                                                                                                                                                                                           | 1. Yes<br>2. No<br>9. Don't know | <input type="checkbox"/>            |
| V1.14 | Did the baby ever breathe?                                                                                                                                                                                        | 1. Yes<br>2. No<br>9. Don't know | <input type="checkbox"/>            |
| V1.15 | <i>Refer to VQ1.11–1.14. If “Dead” &amp; no crying, movement or breathing, mark “Stillbirth.” If “Alive” &amp; VQ1.12–1.14 = “No,” or if “Dead” and VQ1.12, 1.13 or 1.14 = “Yes,” then discuss &amp; correct.</i> | 1. Stillbirth<br>2. Live birth   | <input type="checkbox"/> 2 → VQ1.20 |

**Stillbirths**

|                             |                                                                                                                                                  |                                                                                                                                                                                                                                                              |                                                                                                                                                                                                                                                                                                                                                                                                                                                                                                                                                                                                                                                                                                                 |     |    |                             |                             |                             |                             |                             |                             |                             |                             |
|-----------------------------|--------------------------------------------------------------------------------------------------------------------------------------------------|--------------------------------------------------------------------------------------------------------------------------------------------------------------------------------------------------------------------------------------------------------------|-----------------------------------------------------------------------------------------------------------------------------------------------------------------------------------------------------------------------------------------------------------------------------------------------------------------------------------------------------------------------------------------------------------------------------------------------------------------------------------------------------------------------------------------------------------------------------------------------------------------------------------------------------------------------------------------------------------------|-----|----|-----------------------------|-----------------------------|-----------------------------|-----------------------------|-----------------------------|-----------------------------|-----------------------------|-----------------------------|
| V1.16                       | Were there any bruises or signs of injury on the baby's body at birth?                                                                           | 1. Yes<br>2. No<br>9. Don't know                                                                                                                                                                                                                             | <input type="checkbox"/>                                                                                                                                                                                                                                                                                                                                                                                                                                                                                                                                                                                                                                                                                        |     |    |                             |                             |                             |                             |                             |                             |                             |                             |
| V1.17                       | Was the baby's body (skin and tissue) pulpy?                                                                                                     | 1. Yes<br>2. No<br>9. Don't know                                                                                                                                                                                                                             | <input type="checkbox"/>                                                                                                                                                                                                                                                                                                                                                                                                                                                                                                                                                                                                                                                                                        |     |    |                             |                             |                             |                             |                             |                             |                             |                             |
| V1.18                       | Was any part of the baby physically abnormal at the time of delivery? (for example: body part too large or too small, additional growth on body) | 1. Yes<br>2. No<br>9. Don't know                                                                                                                                                                                                                             | <input type="checkbox"/> 2 or 9 → SQ3.1                                                                                                                                                                                                                                                                                                                                                                                                                                                                                                                                                                                                                                                                         |     |    |                             |                             |                             |                             |                             |                             |                             |                             |
| V1.19                       | What were the abnormalities?<br><br><i>Ask for the following abnormalities [Mark all that apply – Show photos]</i>                               | 1. Was the head size very small at the time of birth .....<br>2. Was the head size very large at the time of birth .....<br>3. Was there a mass defect on the back of head or spine.....<br>4. Was there any other abnormality (If “Yes,” then specify)..... | <table style="width: 100%; border: none;"> <tr> <td style="text-align: center; border: none;">Yes</td> <td style="text-align: center; border: none;">No</td> </tr> <tr> <td style="border: none;">1. <input type="checkbox"/></td> <td style="border: none;">2. <input type="checkbox"/></td> </tr> <tr> <td style="border: none;">1. <input type="checkbox"/></td> <td style="border: none;">2. <input type="checkbox"/></td> </tr> <tr> <td style="border: none;">1. <input type="checkbox"/></td> <td style="border: none;">2. <input type="checkbox"/></td> </tr> <tr> <td style="border: none;">1. <input type="checkbox"/></td> <td style="border: none;">2. <input type="checkbox"/></td> </tr> </table> | Yes | No | 1. <input type="checkbox"/> | 2. <input type="checkbox"/> | 1. <input type="checkbox"/> | 2. <input type="checkbox"/> | 1. <input type="checkbox"/> | 2. <input type="checkbox"/> | 1. <input type="checkbox"/> | 2. <input type="checkbox"/> |
| Yes                         | No                                                                                                                                               |                                                                                                                                                                                                                                                              |                                                                                                                                                                                                                                                                                                                                                                                                                                                                                                                                                                                                                                                                                                                 |     |    |                             |                             |                             |                             |                             |                             |                             |                             |
| 1. <input type="checkbox"/> | 2. <input type="checkbox"/>                                                                                                                      |                                                                                                                                                                                                                                                              |                                                                                                                                                                                                                                                                                                                                                                                                                                                                                                                                                                                                                                                                                                                 |     |    |                             |                             |                             |                             |                             |                             |                             |                             |
| 1. <input type="checkbox"/> | 2. <input type="checkbox"/>                                                                                                                      |                                                                                                                                                                                                                                                              |                                                                                                                                                                                                                                                                                                                                                                                                                                                                                                                                                                                                                                                                                                                 |     |    |                             |                             |                             |                             |                             |                             |                             |                             |
| 1. <input type="checkbox"/> | 2. <input type="checkbox"/>                                                                                                                      |                                                                                                                                                                                                                                                              |                                                                                                                                                                                                                                                                                                                                                                                                                                                                                                                                                                                                                                                                                                                 |     |    |                             |                             |                             |                             |                             |                             |                             |                             |
| 1. <input type="checkbox"/> | 2. <input type="checkbox"/>                                                                                                                      |                                                                                                                                                                                                                                                              |                                                                                                                                                                                                                                                                                                                                                                                                                                                                                                                                                                                                                                                                                                                 |     |    |                             |                             |                             |                             |                             |                             |                             |                             |

**Inst\_1: STOP. After completing VQ1.19 → SQ3.1 (Maternal history)**

**Live births**

|                             |                                                                                                                                                                                                                                                                                       |                                                                                                                                                                                                                                                                                                                                                                                                                                                                                                                                                                                                                                                         |                           |                             |                            |     |     |     |     |     |   |   |   |   |   |   |   |   |
|-----------------------------|---------------------------------------------------------------------------------------------------------------------------------------------------------------------------------------------------------------------------------------------------------------------------------------|---------------------------------------------------------------------------------------------------------------------------------------------------------------------------------------------------------------------------------------------------------------------------------------------------------------------------------------------------------------------------------------------------------------------------------------------------------------------------------------------------------------------------------------------------------------------------------------------------------------------------------------------------------|---------------------------|-----------------------------|----------------------------|-----|-----|-----|-----|-----|---|---|---|---|---|---|---|---|
| V1.20                       | How old was the child when the illness started?<br><br><i>[Record days if less than 28 days—if less than 24 hours, record “00” days; Record months if 28 days-11 months; Record years if 1 year or older.]</i>                                                                        | <table style="width: 100%; border: none;"> <tr><td style="border: none;">___ ___ Days<br/>(DK = 99)</td></tr> <tr><td style="border: none;">___ ___ Months<br/>(DK = 99)</td></tr> <tr><td style="border: none;">___ ___ Years<br/>(DK = 99)</td></tr> </table>                                                                                                                                                                                                                                                                                                                                                                                         | ___ ___ Days<br>(DK = 99) | ___ ___ Months<br>(DK = 99) | ___ ___ Years<br>(DK = 99) |     |     |     |     |     |   |   |   |   |   |   |   |   |
| ___ ___ Days<br>(DK = 99)   |                                                                                                                                                                                                                                                                                       |                                                                                                                                                                                                                                                                                                                                                                                                                                                                                                                                                                                                                                                         |                           |                             |                            |     |     |     |     |     |   |   |   |   |   |   |   |   |
| ___ ___ Months<br>(DK = 99) |                                                                                                                                                                                                                                                                                       |                                                                                                                                                                                                                                                                                                                                                                                                                                                                                                                                                                                                                                                         |                           |                             |                            |     |     |     |     |     |   |   |   |   |   |   |   |   |
| ___ ___ Years<br>(DK = 99)  |                                                                                                                                                                                                                                                                                       |                                                                                                                                                                                                                                                                                                                                                                                                                                                                                                                                                                                                                                                         |                           |                             |                            |     |     |     |     |     |   |   |   |   |   |   |   |   |
| V1.21                       | How long did the illness last?<br><br><i>[Record days if less than 28 days—if less than 24 hours, record “00” days; Record months if 28 days or more.]</i>                                                                                                                            | <table style="width: 100%; border: none;"> <tr><td style="border: none;">___ ___ Days<br/>(DK = 99)</td></tr> <tr><td style="border: none;">___ ___ Months<br/>(DK = 99)</td></tr> </table>                                                                                                                                                                                                                                                                                                                                                                                                                                                             | ___ ___ Days<br>(DK = 99) | ___ ___ Months<br>(DK = 99) |                            |     |     |     |     |     |   |   |   |   |   |   |   |   |
| ___ ___ Days<br>(DK = 99)   |                                                                                                                                                                                                                                                                                       |                                                                                                                                                                                                                                                                                                                                                                                                                                                                                                                                                                                                                                                         |                           |                             |                            |     |     |     |     |     |   |   |   |   |   |   |   |   |
| ___ ___ Months<br>(DK = 99) |                                                                                                                                                                                                                                                                                       |                                                                                                                                                                                                                                                                                                                                                                                                                                                                                                                                                                                                                                                         |                           |                             |                            |     |     |     |     |     |   |   |   |   |   |   |   |   |
| V1.22                       | Where did the deceased die?                                                                                                                                                                                                                                                           | 1. Hospital<br>2. Other health provider or facility<br>3. On route to a health provider or facility<br>4. Home<br>5. Other (specify).....<br>9. Don't know                                                                                                                                                                                                                                                                                                                                                                                                                                                                                              | <input type="checkbox"/>  |                             |                            |     |     |     |     |     |   |   |   |   |   |   |   |   |
| V1.24                       | What was the date of death?<br><br><i>Compare the date of death just stated by the respondent to the date of death from the prior record (GQ1.5). Discuss any inconsistency with the respondent to confirm or correct the stated date. You cannot change the prior record's date.</i> | <table style="width: 100%; border: none;"> <tr> <td style="border: none;">___</td> <td style="border: none;">/</td> <td style="border: none;">___</td> <td style="border: none;">/</td> <td style="border: none;">___</td> <td style="border: none;">___</td> <td style="border: none;">___</td> <td style="border: none;">___</td> </tr> <tr> <td style="border: none;">D</td> <td style="border: none;">D</td> <td style="border: none;">M</td> <td style="border: none;">M</td> <td style="border: none;">Y</td> <td style="border: none;">Y</td> <td style="border: none;">Y</td> <td style="border: none;">Y</td> </tr> </table> (DK = 99/99/9999) | ___                       | /                           | ___                        | /   | ___ | ___ | ___ | ___ | D | D | M | M | Y | Y | Y | Y |
| ___                         | /                                                                                                                                                                                                                                                                                     | ___                                                                                                                                                                                                                                                                                                                                                                                                                                                                                                                                                                                                                                                     | /                         | ___                         | ___                        | ___ | ___ |     |     |     |   |   |   |   |   |   |   |   |
| D                           | D                                                                                                                                                                                                                                                                                     | M                                                                                                                                                                                                                                                                                                                                                                                                                                                                                                                                                                                                                                                       | M                         | Y                           | Y                          | Y   | Y   |     |     |     |   |   |   |   |   |   |   |   |

Study ID#

|                 |  |  |  |    |  |  |  |       |  |  |  |
|-----------------|--|--|--|----|--|--|--|-------|--|--|--|
|                 |  |  |  |    |  |  |  |       |  |  |  |
| Village/Cluster |  |  |  | HH |  |  |  | Child |  |  |  |

**CHILD HEALTH EPIDEMIOLOGY REFERENCE GROUP  
SB/NN/CHILD VERBAL/SOCIAL AUTOPSY QUESTIONNAIRE**

|       |                                                                                                                                                                                                                                                                                                                                                                                                                                                                                                                                                                                                                                                                                                                                                                                                                                                                                                                                                                                                                                                                                                                                                                                                                                                                                                                                                                                                                                                                                                                                                                          |                                                                                                                                                                                                                                                      |
|-------|--------------------------------------------------------------------------------------------------------------------------------------------------------------------------------------------------------------------------------------------------------------------------------------------------------------------------------------------------------------------------------------------------------------------------------------------------------------------------------------------------------------------------------------------------------------------------------------------------------------------------------------------------------------------------------------------------------------------------------------------------------------------------------------------------------------------------------------------------------------------------------------------------------------------------------------------------------------------------------------------------------------------------------------------------------------------------------------------------------------------------------------------------------------------------------------------------------------------------------------------------------------------------------------------------------------------------------------------------------------------------------------------------------------------------------------------------------------------------------------------------------------------------------------------------------------------------|------------------------------------------------------------------------------------------------------------------------------------------------------------------------------------------------------------------------------------------------------|
| V1.25 | <p><b>AGE AT DEATH</b></p> <p><b>Record only the calculated age <u>OR</u> the stated age. First try to calculate the age. If this is not possible, then ask the respondent for the child's age at death.</b></p>                                                                                                                                                                                                                                                                                                                                                                                                                                                                                                                                                                                                                                                                                                                                                                                                                                                                                                                                                                                                                                                                                                                                                                                                                                                                                                                                                         |                                                                                                                                                                                                                                                      |
|       | <p><b>CALCULATE THE AGE AT DEATH</b></p> <p>Record the delivery date from VQ1.10: <math>\frac{\quad}{D} \frac{\quad}{D} \frac{\quad}{M} \frac{\quad}{M} \frac{\quad}{Y} \frac{\quad}{Y} \frac{\quad}{Y} \frac{\quad}{Y}</math><br/>(Don't Know = 99/99/9999)</p> <p>Record the date of death from VQ1.24: <math>\frac{\quad}{D} \frac{\quad}{D} \frac{\quad}{M} \frac{\quad}{M} \frac{\quad}{Y} \frac{\quad}{Y} \frac{\quad}{Y} \frac{\quad}{Y}</math><br/>(Don't Know = 99/99/9999)</p> <p>Now, if possible, calculate the age at death (VQ1.24 – VQ1.10). If only the month and year are known, you may still be able to calculate the approximate age in months or years. Discuss the calculated age with the respondent: I have calculated that the child was (about) &lt;CALCULATED AGE&gt; at death. Is this correct?</p> <p>If the respondent does not agree with the calculated age, then again discuss the delivery date and date of death to make sure that these are correct. If the calculated age at death cannot be resolved, then go below to the "STATED AGE" box.</p> <p>Once the age at death is calculated, check VQ1.20 and VQ1.21 to make sure that the age at illness onset and the illness duration are consistent with the age at death. For example, the age at onset + duration cannot be greater than the age at death.</p> <p>[Record days if less than 28 days—if less than 24 hours, record "00" days; Record months if 28 days-11 months; Record years if 1 year or older.]</p> <p>After recording the calculated age → <b>VQ1.26</b></p> | <p style="text-align: right;">____ Days (if &lt; 28 days)<br/>(DK = 99)</p> <hr/> <p style="text-align: right;">____ Months (if 1-11 months)<br/>(DK = 99)</p> <hr/> <p style="text-align: right;">____ Years (if 1 year or older)<br/>(DK = 99)</p> |
|       | <p><b>STATED AGE AT DEATH (Ask only if the calculated age cannot be determined)</b></p> <p>How old was the deceased at the time of death?</p> <p>Compare the age at death just stated by the respondent to the child's last known age from the prior record (GQ1.6). Discuss any inconsistency with the respondent to confirm or correct the stated age. You cannot change the prior record's age. Partly known delivery and death dates might help resolve the stated age. For example, if the child was born and died in the same month, then this is likely a neonatal death.</p> <p>Once the age at death is determined, check VQ1.20 and VQ1.21 to make sure that the age at illness onset and the illness duration are consistent with the age at death. For example, the age at onset + duration cannot be greater than the age at death.</p> <p>[Record days if less than 28 days—if less than 24 hours, record "00" days; Record months if 28 days-11 months; Record years if 1 year or older.]</p>                                                                                                                                                                                                                                                                                                                                                                                                                                                                                                                                                             | <p style="text-align: right;">____ Days (if &lt; 28 days)<br/>(DK = 99)</p> <hr/> <p style="text-align: right;">____ Months (if 1-11 months)<br/>(DK = 99)</p> <hr/> <p style="text-align: right;">____ Years (if 1 year or older)<br/>(DK = 99)</p> |
| V1.26 | <p>Mark the baby's age at the time of death.</p> <p>[Use the calculated age (VQ1.24 – VQ1.10) if known, or the stated age (VQ1.25). If both the calculated and stated ages are unknown, then use your best judgment to mark the child's age at death.]</p>                                                                                                                                                                                                                                                                                                                                                                                                                                                                                                                                                                                                                                                                                                                                                                                                                                                                                                                                                                                                                                                                                                                                                                                                                                                                                                               | <p>1. Less than 28 days old<br/>2. 1-59 months old</p> <p style="text-align: right;"><input type="checkbox"/> 2 → SQ5b.1</p>                                                                                                                         |



Study ID#

|                 |  |  |  |    |  |  |  |       |  |  |  |
|-----------------|--|--|--|----|--|--|--|-------|--|--|--|
|                 |  |  |  |    |  |  |  |       |  |  |  |
| Village/Cluster |  |  |  | HH |  |  |  | Child |  |  |  |

**CHILD HEALTH EPIDEMIOLOGY REFERENCE GROUP  
SB/NN/CHILD VERBAL/SOCIAL AUTOPSY QUESTIONNAIRE**

**SA Module 3 and VA Section 2: Maternal history (FOR STILLBIRTHS AND NN DEATHS < 28 DAYS OLD)**

Read: Now, I would like to ask you some questions about (your / the mother's) health and (your / her) pregnancy with <NAME>.

Here and in the following questions, read "...the mother...", "...her..." and "...she..." if the mother is not the respondent.

| S3.1                        | <p>Before the pregnancy with &lt;NAME&gt;, did (you / the mother) suffer from any of the following known conditions:</p> <p><i>[Read out all options and check "Yes," "No" or "Don't know" for each.]</i></p> <p>If "Yes," then ask: Did (you / she) undergo treatment for this condition during the pregnancy?</p> | <ol style="list-style-type: none"> <li>High blood pressure .....</li> <li>Heart disease .....</li> <li>Diabetes .....</li> <li>Epilepsy/convulsion .....</li> <li>Other .....</li> </ol> <p>(specify other).....</p>                                                                                                                                                                                                                                                                                                                                                                                    | <table border="1"> <thead> <tr> <th colspan="3">Suffered from</th> <th colspan="3">Treatment</th> </tr> <tr> <th>Yes</th> <th>No</th> <th>DK</th> <th>Yes</th> <th>No</th> <th>DK</th> </tr> </thead> <tbody> <tr> <td>1. <input type="checkbox"/></td> <td>2. <input type="checkbox"/></td> <td>9. <input type="checkbox"/></td> <td>1. <input type="checkbox"/></td> <td>2. <input type="checkbox"/></td> <td>9. <input type="checkbox"/></td> </tr> <tr> <td>1. <input type="checkbox"/></td> <td>2. <input type="checkbox"/></td> <td>9. <input type="checkbox"/></td> <td>1. <input type="checkbox"/></td> <td>2. <input type="checkbox"/></td> <td>9. <input type="checkbox"/></td> </tr> <tr> <td>1. <input type="checkbox"/></td> <td>2. <input type="checkbox"/></td> <td>9. <input type="checkbox"/></td> <td>1. <input type="checkbox"/></td> <td>2. <input type="checkbox"/></td> <td>9. <input type="checkbox"/></td> </tr> <tr> <td>1. <input type="checkbox"/></td> <td>2. <input type="checkbox"/></td> <td>9. <input type="checkbox"/></td> <td>1. <input type="checkbox"/></td> <td>2. <input type="checkbox"/></td> <td>9. <input type="checkbox"/></td> </tr> <tr> <td>1. <input type="checkbox"/></td> <td>2. <input type="checkbox"/></td> <td>9. <input type="checkbox"/></td> <td>1. <input type="checkbox"/></td> <td>2. <input type="checkbox"/></td> <td>9. <input type="checkbox"/></td> </tr> </tbody> </table> | Suffered from               |                             |    | Treatment                   |                             |                             | Yes                         | No                          | DK                          | Yes                         | No                          | DK                          | 1. <input type="checkbox"/> | 2. <input type="checkbox"/> | 9. <input type="checkbox"/> | 1. <input type="checkbox"/> | 2. <input type="checkbox"/> | 9. <input type="checkbox"/> | 1. <input type="checkbox"/> | 2. <input type="checkbox"/> | 9. <input type="checkbox"/> | 1. <input type="checkbox"/> | 2. <input type="checkbox"/> | 9. <input type="checkbox"/> | 1. <input type="checkbox"/> | 2. <input type="checkbox"/> | 9. <input type="checkbox"/> | 1. <input type="checkbox"/> | 2. <input type="checkbox"/> | 9. <input type="checkbox"/> | 1. <input type="checkbox"/> | 2. <input type="checkbox"/> | 9. <input type="checkbox"/> | 1. <input type="checkbox"/> | 2. <input type="checkbox"/> | 9. <input type="checkbox"/> | 1. <input type="checkbox"/> | 2. <input type="checkbox"/> | 9. <input type="checkbox"/> | 1. <input type="checkbox"/> | 2. <input type="checkbox"/> | 9. <input type="checkbox"/> |  |
|-----------------------------|---------------------------------------------------------------------------------------------------------------------------------------------------------------------------------------------------------------------------------------------------------------------------------------------------------------------|---------------------------------------------------------------------------------------------------------------------------------------------------------------------------------------------------------------------------------------------------------------------------------------------------------------------------------------------------------------------------------------------------------------------------------------------------------------------------------------------------------------------------------------------------------------------------------------------------------|----------------------------------------------------------------------------------------------------------------------------------------------------------------------------------------------------------------------------------------------------------------------------------------------------------------------------------------------------------------------------------------------------------------------------------------------------------------------------------------------------------------------------------------------------------------------------------------------------------------------------------------------------------------------------------------------------------------------------------------------------------------------------------------------------------------------------------------------------------------------------------------------------------------------------------------------------------------------------------------------------------------------------------------------------------------------------------------------------------------------------------------------------------------------------------------------------------------------------------------------------------------------------------------------------------------------------------------------------------------------------------------------------------------------------------------------|-----------------------------|-----------------------------|----|-----------------------------|-----------------------------|-----------------------------|-----------------------------|-----------------------------|-----------------------------|-----------------------------|-----------------------------|-----------------------------|-----------------------------|-----------------------------|-----------------------------|-----------------------------|-----------------------------|-----------------------------|-----------------------------|-----------------------------|-----------------------------|-----------------------------|-----------------------------|-----------------------------|-----------------------------|-----------------------------|-----------------------------|-----------------------------|-----------------------------|-----------------------------|-----------------------------|-----------------------------|-----------------------------|-----------------------------|-----------------------------|-----------------------------|-----------------------------|-----------------------------|-----------------------------|-----------------------------|-----------------------------|-----------------------------|--|
| Suffered from               |                                                                                                                                                                                                                                                                                                                     |                                                                                                                                                                                                                                                                                                                                                                                                                                                                                                                                                                                                         | Treatment                                                                                                                                                                                                                                                                                                                                                                                                                                                                                                                                                                                                                                                                                                                                                                                                                                                                                                                                                                                                                                                                                                                                                                                                                                                                                                                                                                                                                                    |                             |                             |    |                             |                             |                             |                             |                             |                             |                             |                             |                             |                             |                             |                             |                             |                             |                             |                             |                             |                             |                             |                             |                             |                             |                             |                             |                             |                             |                             |                             |                             |                             |                             |                             |                             |                             |                             |                             |                             |                             |                             |  |
| Yes                         | No                                                                                                                                                                                                                                                                                                                  | DK                                                                                                                                                                                                                                                                                                                                                                                                                                                                                                                                                                                                      | Yes                                                                                                                                                                                                                                                                                                                                                                                                                                                                                                                                                                                                                                                                                                                                                                                                                                                                                                                                                                                                                                                                                                                                                                                                                                                                                                                                                                                                                                          | No                          | DK                          |    |                             |                             |                             |                             |                             |                             |                             |                             |                             |                             |                             |                             |                             |                             |                             |                             |                             |                             |                             |                             |                             |                             |                             |                             |                             |                             |                             |                             |                             |                             |                             |                             |                             |                             |                             |                             |                             |                             |                             |  |
| 1. <input type="checkbox"/> | 2. <input type="checkbox"/>                                                                                                                                                                                                                                                                                         | 9. <input type="checkbox"/>                                                                                                                                                                                                                                                                                                                                                                                                                                                                                                                                                                             | 1. <input type="checkbox"/>                                                                                                                                                                                                                                                                                                                                                                                                                                                                                                                                                                                                                                                                                                                                                                                                                                                                                                                                                                                                                                                                                                                                                                                                                                                                                                                                                                                                                  | 2. <input type="checkbox"/> | 9. <input type="checkbox"/> |    |                             |                             |                             |                             |                             |                             |                             |                             |                             |                             |                             |                             |                             |                             |                             |                             |                             |                             |                             |                             |                             |                             |                             |                             |                             |                             |                             |                             |                             |                             |                             |                             |                             |                             |                             |                             |                             |                             |                             |  |
| 1. <input type="checkbox"/> | 2. <input type="checkbox"/>                                                                                                                                                                                                                                                                                         | 9. <input type="checkbox"/>                                                                                                                                                                                                                                                                                                                                                                                                                                                                                                                                                                             | 1. <input type="checkbox"/>                                                                                                                                                                                                                                                                                                                                                                                                                                                                                                                                                                                                                                                                                                                                                                                                                                                                                                                                                                                                                                                                                                                                                                                                                                                                                                                                                                                                                  | 2. <input type="checkbox"/> | 9. <input type="checkbox"/> |    |                             |                             |                             |                             |                             |                             |                             |                             |                             |                             |                             |                             |                             |                             |                             |                             |                             |                             |                             |                             |                             |                             |                             |                             |                             |                             |                             |                             |                             |                             |                             |                             |                             |                             |                             |                             |                             |                             |                             |  |
| 1. <input type="checkbox"/> | 2. <input type="checkbox"/>                                                                                                                                                                                                                                                                                         | 9. <input type="checkbox"/>                                                                                                                                                                                                                                                                                                                                                                                                                                                                                                                                                                             | 1. <input type="checkbox"/>                                                                                                                                                                                                                                                                                                                                                                                                                                                                                                                                                                                                                                                                                                                                                                                                                                                                                                                                                                                                                                                                                                                                                                                                                                                                                                                                                                                                                  | 2. <input type="checkbox"/> | 9. <input type="checkbox"/> |    |                             |                             |                             |                             |                             |                             |                             |                             |                             |                             |                             |                             |                             |                             |                             |                             |                             |                             |                             |                             |                             |                             |                             |                             |                             |                             |                             |                             |                             |                             |                             |                             |                             |                             |                             |                             |                             |                             |                             |  |
| 1. <input type="checkbox"/> | 2. <input type="checkbox"/>                                                                                                                                                                                                                                                                                         | 9. <input type="checkbox"/>                                                                                                                                                                                                                                                                                                                                                                                                                                                                                                                                                                             | 1. <input type="checkbox"/>                                                                                                                                                                                                                                                                                                                                                                                                                                                                                                                                                                                                                                                                                                                                                                                                                                                                                                                                                                                                                                                                                                                                                                                                                                                                                                                                                                                                                  | 2. <input type="checkbox"/> | 9. <input type="checkbox"/> |    |                             |                             |                             |                             |                             |                             |                             |                             |                             |                             |                             |                             |                             |                             |                             |                             |                             |                             |                             |                             |                             |                             |                             |                             |                             |                             |                             |                             |                             |                             |                             |                             |                             |                             |                             |                             |                             |                             |                             |  |
| 1. <input type="checkbox"/> | 2. <input type="checkbox"/>                                                                                                                                                                                                                                                                                         | 9. <input type="checkbox"/>                                                                                                                                                                                                                                                                                                                                                                                                                                                                                                                                                                             | 1. <input type="checkbox"/>                                                                                                                                                                                                                                                                                                                                                                                                                                                                                                                                                                                                                                                                                                                                                                                                                                                                                                                                                                                                                                                                                                                                                                                                                                                                                                                                                                                                                  | 2. <input type="checkbox"/> | 9. <input type="checkbox"/> |    |                             |                             |                             |                             |                             |                             |                             |                             |                             |                             |                             |                             |                             |                             |                             |                             |                             |                             |                             |                             |                             |                             |                             |                             |                             |                             |                             |                             |                             |                             |                             |                             |                             |                             |                             |                             |                             |                             |                             |  |
| S3.2                        | During the pregnancy, did (you / the mother) see anyone for antenatal care?                                                                                                                                                                                                                                         | <ol style="list-style-type: none"> <li>Yes</li> <li>No</li> <li>Don't know</li> </ol>                                                                                                                                                                                                                                                                                                                                                                                                                                                                                                                   | <input type="checkbox"/> 2 or 9 → SQ3.3                                                                                                                                                                                                                                                                                                                                                                                                                                                                                                                                                                                                                                                                                                                                                                                                                                                                                                                                                                                                                                                                                                                                                                                                                                                                                                                                                                                                      |                             |                             |    |                             |                             |                             |                             |                             |                             |                             |                             |                             |                             |                             |                             |                             |                             |                             |                             |                             |                             |                             |                             |                             |                             |                             |                             |                             |                             |                             |                             |                             |                             |                             |                             |                             |                             |                             |                             |                             |                             |                             |  |
| S3.2.1                      | Whom did (you / she) see? Anyone else?<br><br><i>[Probe, and record all persons seen.]</i>                                                                                                                                                                                                                          | <ol style="list-style-type: none"> <li>Health care provider .....</li> <li>TBA/Religious healer.....</li> <li>Relative/neighbor/friend.....</li> <li>Other (specify).....</li> <li>(.....)</li> <li>Don't know.....</li> </ol>                                                                                                                                                                                                                                                                                                                                                                          | <ol style="list-style-type: none"> <li><input type="checkbox"/></li> <li><input type="checkbox"/></li> <li><input type="checkbox"/></li> <li><input type="checkbox"/></li> <li><input type="checkbox"/></li> <li><input type="checkbox"/></li> </ol>                                                                                                                                                                                                                                                                                                                                                                                                                                                                                                                                                                                                                                                                                                                                                                                                                                                                                                                                                                                                                                                                                                                                                                                         | → SQ3.3                     |                             |    |                             |                             |                             |                             |                             |                             |                             |                             |                             |                             |                             |                             |                             |                             |                             |                             |                             |                             |                             |                             |                             |                             |                             |                             |                             |                             |                             |                             |                             |                             |                             |                             |                             |                             |                             |                             |                             |                             |                             |  |
| S3.2.2                      | How many times did (you / the mother) receive antenatal care from a health care provider during this pregnancy?                                                                                                                                                                                                     |                                                                                                                                                                                                                                                                                                                                                                                                                                                                                                                                                                                                         | _____ Times<br>(DK = 99)                                                                                                                                                                                                                                                                                                                                                                                                                                                                                                                                                                                                                                                                                                                                                                                                                                                                                                                                                                                                                                                                                                                                                                                                                                                                                                                                                                                                                     |                             |                             |    |                             |                             |                             |                             |                             |                             |                             |                             |                             |                             |                             |                             |                             |                             |                             |                             |                             |                             |                             |                             |                             |                             |                             |                             |                             |                             |                             |                             |                             |                             |                             |                             |                             |                             |                             |                             |                             |                             |                             |  |
| S3.2.3                      | During which month of the pregnancy did (you / the mother) <u>last</u> receive antenatal care from a health care provider?                                                                                                                                                                                          |                                                                                                                                                                                                                                                                                                                                                                                                                                                                                                                                                                                                         | _____ Month<br>(DK = 99)                                                                                                                                                                                                                                                                                                                                                                                                                                                                                                                                                                                                                                                                                                                                                                                                                                                                                                                                                                                                                                                                                                                                                                                                                                                                                                                                                                                                                     |                             |                             |    |                             |                             |                             |                             |                             |                             |                             |                             |                             |                             |                             |                             |                             |                             |                             |                             |                             |                             |                             |                             |                             |                             |                             |                             |                             |                             |                             |                             |                             |                             |                             |                             |                             |                             |                             |                             |                             |                             |                             |  |
| S3.2.4                      | During this pregnancy, did the provider do any of the following for (you / the mother) at least once?<br><br><i>[Read out all options and check "Yes," "No" or "Don't know" for each.]</i><br><br><i>[LOCAL ADAPTATION: Additional high energy and high protein foods to mention If the respondent asks]</i>        | <ol style="list-style-type: none"> <li>Did the provider measure (your / her) blood pressure? .....</li> <li>Did (you / she) give a urine sample? .....</li> <li>Did (you / she) give a blood sample? .....</li> <li>Did the provider tell (you / her) to eat more high energy foods like &lt;HIGH ENERGY FOODS&gt; and high protein foods like &lt;HIGH PROTEIN FOODS&gt; than when not pregnant? .....</li> <li>Did the provider tell (you / her) about the danger signs during pregnancy?.....</li> <li>Did the provider tell (you / her) where to go if (you / she) had any danger signs?</li> </ol> | <table border="1"> <thead> <tr> <th>Yes</th> <th>No</th> <th>DK</th> </tr> </thead> <tbody> <tr> <td>1. <input type="checkbox"/></td> <td>2. <input type="checkbox"/></td> <td>9. <input type="checkbox"/></td> </tr> <tr> <td>1. <input type="checkbox"/></td> <td>2. <input type="checkbox"/></td> <td>9. <input type="checkbox"/></td> </tr> <tr> <td>1. <input type="checkbox"/></td> <td>2. <input type="checkbox"/></td> <td>9. <input type="checkbox"/></td> </tr> <tr> <td>1. <input type="checkbox"/></td> <td>2. <input type="checkbox"/></td> <td>9. <input type="checkbox"/></td> </tr> <tr> <td>1. <input type="checkbox"/></td> <td>2. <input type="checkbox"/></td> <td>9. <input type="checkbox"/></td> </tr> </tbody> </table>                                                                                                                                                                                                                                                                                                                                                                                                                                                                                                                                                                                                                                                                                              | Yes                         | No                          | DK | 1. <input type="checkbox"/> | 2. <input type="checkbox"/> | 9. <input type="checkbox"/> | 1. <input type="checkbox"/> | 2. <input type="checkbox"/> | 9. <input type="checkbox"/> | 1. <input type="checkbox"/> | 2. <input type="checkbox"/> | 9. <input type="checkbox"/> | 1. <input type="checkbox"/> | 2. <input type="checkbox"/> | 9. <input type="checkbox"/> | 1. <input type="checkbox"/> | 2. <input type="checkbox"/> | 9. <input type="checkbox"/> |                             |                             |                             |                             |                             |                             |                             |                             |                             |                             |                             |                             |                             |                             |                             |                             |                             |                             |                             |                             |                             |                             |                             |                             |  |
| Yes                         | No                                                                                                                                                                                                                                                                                                                  | DK                                                                                                                                                                                                                                                                                                                                                                                                                                                                                                                                                                                                      |                                                                                                                                                                                                                                                                                                                                                                                                                                                                                                                                                                                                                                                                                                                                                                                                                                                                                                                                                                                                                                                                                                                                                                                                                                                                                                                                                                                                                                              |                             |                             |    |                             |                             |                             |                             |                             |                             |                             |                             |                             |                             |                             |                             |                             |                             |                             |                             |                             |                             |                             |                             |                             |                             |                             |                             |                             |                             |                             |                             |                             |                             |                             |                             |                             |                             |                             |                             |                             |                             |                             |  |
| 1. <input type="checkbox"/> | 2. <input type="checkbox"/>                                                                                                                                                                                                                                                                                         | 9. <input type="checkbox"/>                                                                                                                                                                                                                                                                                                                                                                                                                                                                                                                                                                             |                                                                                                                                                                                                                                                                                                                                                                                                                                                                                                                                                                                                                                                                                                                                                                                                                                                                                                                                                                                                                                                                                                                                                                                                                                                                                                                                                                                                                                              |                             |                             |    |                             |                             |                             |                             |                             |                             |                             |                             |                             |                             |                             |                             |                             |                             |                             |                             |                             |                             |                             |                             |                             |                             |                             |                             |                             |                             |                             |                             |                             |                             |                             |                             |                             |                             |                             |                             |                             |                             |                             |  |
| 1. <input type="checkbox"/> | 2. <input type="checkbox"/>                                                                                                                                                                                                                                                                                         | 9. <input type="checkbox"/>                                                                                                                                                                                                                                                                                                                                                                                                                                                                                                                                                                             |                                                                                                                                                                                                                                                                                                                                                                                                                                                                                                                                                                                                                                                                                                                                                                                                                                                                                                                                                                                                                                                                                                                                                                                                                                                                                                                                                                                                                                              |                             |                             |    |                             |                             |                             |                             |                             |                             |                             |                             |                             |                             |                             |                             |                             |                             |                             |                             |                             |                             |                             |                             |                             |                             |                             |                             |                             |                             |                             |                             |                             |                             |                             |                             |                             |                             |                             |                             |                             |                             |                             |  |
| 1. <input type="checkbox"/> | 2. <input type="checkbox"/>                                                                                                                                                                                                                                                                                         | 9. <input type="checkbox"/>                                                                                                                                                                                                                                                                                                                                                                                                                                                                                                                                                                             |                                                                                                                                                                                                                                                                                                                                                                                                                                                                                                                                                                                                                                                                                                                                                                                                                                                                                                                                                                                                                                                                                                                                                                                                                                                                                                                                                                                                                                              |                             |                             |    |                             |                             |                             |                             |                             |                             |                             |                             |                             |                             |                             |                             |                             |                             |                             |                             |                             |                             |                             |                             |                             |                             |                             |                             |                             |                             |                             |                             |                             |                             |                             |                             |                             |                             |                             |                             |                             |                             |                             |  |
| 1. <input type="checkbox"/> | 2. <input type="checkbox"/>                                                                                                                                                                                                                                                                                         | 9. <input type="checkbox"/>                                                                                                                                                                                                                                                                                                                                                                                                                                                                                                                                                                             |                                                                                                                                                                                                                                                                                                                                                                                                                                                                                                                                                                                                                                                                                                                                                                                                                                                                                                                                                                                                                                                                                                                                                                                                                                                                                                                                                                                                                                              |                             |                             |    |                             |                             |                             |                             |                             |                             |                             |                             |                             |                             |                             |                             |                             |                             |                             |                             |                             |                             |                             |                             |                             |                             |                             |                             |                             |                             |                             |                             |                             |                             |                             |                             |                             |                             |                             |                             |                             |                             |                             |  |
| 1. <input type="checkbox"/> | 2. <input type="checkbox"/>                                                                                                                                                                                                                                                                                         | 9. <input type="checkbox"/>                                                                                                                                                                                                                                                                                                                                                                                                                                                                                                                                                                             |                                                                                                                                                                                                                                                                                                                                                                                                                                                                                                                                                                                                                                                                                                                                                                                                                                                                                                                                                                                                                                                                                                                                                                                                                                                                                                                                                                                                                                              |                             |                             |    |                             |                             |                             |                             |                             |                             |                             |                             |                             |                             |                             |                             |                             |                             |                             |                             |                             |                             |                             |                             |                             |                             |                             |                             |                             |                             |                             |                             |                             |                             |                             |                             |                             |                             |                             |                             |                             |                             |                             |  |
| S3.3                        | <p>Please tell me the danger signs during pregnancy or labor and delivery that you should seek care for <u>immediately</u>.</p> <p><i>Probe: Tell me as many of the danger signs as you can.</i></p> <p><i>Probe: Can you tell me any others?</i></p> <p><i>[Check each danger sign mentioned.]</i></p>             | <ol style="list-style-type: none"> <li>Vaginal bleeding .....</li> <li>Convulsions/fits .....</li> <li>Severe headache with blurred vision.....</li> <li>Fever and too weak to get out of bed ...</li> <li>Severe abdominal pain.....</li> <li>Fast or difficult breathing .....</li> <li>Painful contractions every 20 minutes or less for 12 hours or more.....</li> <li>Broken water for 12 hours or more.....</li> <li>Bloody, sticky discharge 12 hrs or more</li> <li>No immediate danger sign mentioned...</li> </ol>                                                                            | <ol style="list-style-type: none"> <li><input type="checkbox"/></li> </ol>                                                                                                                                                                                                                                                                                                                                                                                                                                                                                                                                                                                                                                                                                                                                                                                                                                                                                                                                                                                                                                                 | → _____ Mentioned           |                             |    |                             |                             |                             |                             |                             |                             |                             |                             |                             |                             |                             |                             |                             |                             |                             |                             |                             |                             |                             |                             |                             |                             |                             |                             |                             |                             |                             |                             |                             |                             |                             |                             |                             |                             |                             |                             |                             |                             |                             |  |
| S3.4                        | During this pregnancy, (were you / was the mother) given an injection in the arm to prevent the baby from getting tetanus, that is, convulsions after birth?                                                                                                                                                        | <ol style="list-style-type: none"> <li>Yes</li> <li>No</li> <li>Don't know</li> </ol>                                                                                                                                                                                                                                                                                                                                                                                                                                                                                                                   | <input type="checkbox"/> 2 or 9 → SQ3.5                                                                                                                                                                                                                                                                                                                                                                                                                                                                                                                                                                                                                                                                                                                                                                                                                                                                                                                                                                                                                                                                                                                                                                                                                                                                                                                                                                                                      |                             |                             |    |                             |                             |                             |                             |                             |                             |                             |                             |                             |                             |                             |                             |                             |                             |                             |                             |                             |                             |                             |                             |                             |                             |                             |                             |                             |                             |                             |                             |                             |                             |                             |                             |                             |                             |                             |                             |                             |                             |                             |  |

|                 |  |  |  |    |  |  |  |       |  |  |  |
|-----------------|--|--|--|----|--|--|--|-------|--|--|--|
|                 |  |  |  |    |  |  |  |       |  |  |  |
| Village/Cluster |  |  |  | HH |  |  |  | Child |  |  |  |

**CHILD HEALTH EPIDEMIOLOGY REFERENCE GROUP  
SB/NN/CHILD VERBAL/SOCIAL AUTOPSY QUESTIONNAIRE**

|        |                                                                                                                                                                                                                                                                                                                                                                                                                                              |                                                                                                                                                                                                                                                                                                                                                                                                                                                                                                                                                                                                                                                                                                                                                                                                                                                                                                     |                                                                                                                                                                                                                                                                                                                                                                                                                                                                                                                                                                                                                                                                                                                                                                                                                                                                                                                                                                                                                                                                                                                                                                                                                                                                                                                                                                                                                                                                                                                                                                                                                                                                                                                                                                                                                                                                                                                                                                                                                                                                                                                                                                                                                                                                                                                                                                                                                                                               |  |            |           |           |    |                          |                          |                          |    |                          |                          |                          |    |                          |                          |                          |    |                          |                          |                          |    |                          |                          |                          |    |                          |                          |                          |    |                          |                          |                          |    |                          |                          |                          |    |                          |                          |                          |     |                          |                          |                          |     |                          |                          |                          |     |                          |                          |                          |     |                          |                          |                          |     |                          |                          |                          |     |                          |                          |                          |     |                          |                          |                          |     |                          |                          |                          |     |                          |                          |                          |
|--------|----------------------------------------------------------------------------------------------------------------------------------------------------------------------------------------------------------------------------------------------------------------------------------------------------------------------------------------------------------------------------------------------------------------------------------------------|-----------------------------------------------------------------------------------------------------------------------------------------------------------------------------------------------------------------------------------------------------------------------------------------------------------------------------------------------------------------------------------------------------------------------------------------------------------------------------------------------------------------------------------------------------------------------------------------------------------------------------------------------------------------------------------------------------------------------------------------------------------------------------------------------------------------------------------------------------------------------------------------------------|---------------------------------------------------------------------------------------------------------------------------------------------------------------------------------------------------------------------------------------------------------------------------------------------------------------------------------------------------------------------------------------------------------------------------------------------------------------------------------------------------------------------------------------------------------------------------------------------------------------------------------------------------------------------------------------------------------------------------------------------------------------------------------------------------------------------------------------------------------------------------------------------------------------------------------------------------------------------------------------------------------------------------------------------------------------------------------------------------------------------------------------------------------------------------------------------------------------------------------------------------------------------------------------------------------------------------------------------------------------------------------------------------------------------------------------------------------------------------------------------------------------------------------------------------------------------------------------------------------------------------------------------------------------------------------------------------------------------------------------------------------------------------------------------------------------------------------------------------------------------------------------------------------------------------------------------------------------------------------------------------------------------------------------------------------------------------------------------------------------------------------------------------------------------------------------------------------------------------------------------------------------------------------------------------------------------------------------------------------------------------------------------------------------------------------------------------------------|--|------------|-----------|-----------|----|--------------------------|--------------------------|--------------------------|----|--------------------------|--------------------------|--------------------------|----|--------------------------|--------------------------|--------------------------|----|--------------------------|--------------------------|--------------------------|----|--------------------------|--------------------------|--------------------------|----|--------------------------|--------------------------|--------------------------|----|--------------------------|--------------------------|--------------------------|----|--------------------------|--------------------------|--------------------------|----|--------------------------|--------------------------|--------------------------|-----|--------------------------|--------------------------|--------------------------|-----|--------------------------|--------------------------|--------------------------|-----|--------------------------|--------------------------|--------------------------|-----|--------------------------|--------------------------|--------------------------|-----|--------------------------|--------------------------|--------------------------|-----|--------------------------|--------------------------|--------------------------|-----|--------------------------|--------------------------|--------------------------|-----|--------------------------|--------------------------|--------------------------|-----|--------------------------|--------------------------|--------------------------|
| S3.4.1 | During this pregnancy, how many times did (you / she) get this injection?                                                                                                                                                                                                                                                                                                                                                                    |                                                                                                                                                                                                                                                                                                                                                                                                                                                                                                                                                                                                                                                                                                                                                                                                                                                                                                     | ___ Times<br>(DK = 9)                                                                                                                                                                                                                                                                                                                                                                                                                                                                                                                                                                                                                                                                                                                                                                                                                                                                                                                                                                                                                                                                                                                                                                                                                                                                                                                                                                                                                                                                                                                                                                                                                                                                                                                                                                                                                                                                                                                                                                                                                                                                                                                                                                                                                                                                                                                                                                                                                                         |  |            |           |           |    |                          |                          |                          |    |                          |                          |                          |    |                          |                          |                          |    |                          |                          |                          |    |                          |                          |                          |    |                          |                          |                          |    |                          |                          |                          |    |                          |                          |                          |    |                          |                          |                          |     |                          |                          |                          |     |                          |                          |                          |     |                          |                          |                          |     |                          |                          |                          |     |                          |                          |                          |     |                          |                          |                          |     |                          |                          |                          |     |                          |                          |                          |     |                          |                          |                          |
| S3.5   | At any time before this pregnancy, did (you / the mother) receive any tetanus injection, either to protect yourself or another baby?                                                                                                                                                                                                                                                                                                         | 1. Yes<br>2. No<br>9. Don't know                                                                                                                                                                                                                                                                                                                                                                                                                                                                                                                                                                                                                                                                                                                                                                                                                                                                    | <input type="checkbox"/> 2 or 9 → SQ3.6                                                                                                                                                                                                                                                                                                                                                                                                                                                                                                                                                                                                                                                                                                                                                                                                                                                                                                                                                                                                                                                                                                                                                                                                                                                                                                                                                                                                                                                                                                                                                                                                                                                                                                                                                                                                                                                                                                                                                                                                                                                                                                                                                                                                                                                                                                                                                                                                                       |  |            |           |           |    |                          |                          |                          |    |                          |                          |                          |    |                          |                          |                          |    |                          |                          |                          |    |                          |                          |                          |    |                          |                          |                          |    |                          |                          |                          |    |                          |                          |                          |    |                          |                          |                          |     |                          |                          |                          |     |                          |                          |                          |     |                          |                          |                          |     |                          |                          |                          |     |                          |                          |                          |     |                          |                          |                          |     |                          |                          |                          |     |                          |                          |                          |     |                          |                          |                          |
| S3.5.1 | Before this pregnancy, how many other times did (you / she) receive a tetanus injection?<br><br>[If 7 or more time, record "7."]                                                                                                                                                                                                                                                                                                             |                                                                                                                                                                                                                                                                                                                                                                                                                                                                                                                                                                                                                                                                                                                                                                                                                                                                                                     | ___ Times<br>(DK = 9)                                                                                                                                                                                                                                                                                                                                                                                                                                                                                                                                                                                                                                                                                                                                                                                                                                                                                                                                                                                                                                                                                                                                                                                                                                                                                                                                                                                                                                                                                                                                                                                                                                                                                                                                                                                                                                                                                                                                                                                                                                                                                                                                                                                                                                                                                                                                                                                                                                         |  |            |           |           |    |                          |                          |                          |    |                          |                          |                          |    |                          |                          |                          |    |                          |                          |                          |    |                          |                          |                          |    |                          |                          |                          |    |                          |                          |                          |    |                          |                          |                          |    |                          |                          |                          |     |                          |                          |                          |     |                          |                          |                          |     |                          |                          |                          |     |                          |                          |                          |     |                          |                          |                          |     |                          |                          |                          |     |                          |                          |                          |     |                          |                          |                          |     |                          |                          |                          |
| S3.6   | <i>Skip SQ3.6-3.7.1 in areas wo/malaria.</i><br><br>During this pregnancy, did (you / the mother) sleep under an insecticide treated bednet?                                                                                                                                                                                                                                                                                                 | 1. Yes, usually or always<br>2. Yes, sometimes<br>3. Never<br>9. Don't know                                                                                                                                                                                                                                                                                                                                                                                                                                                                                                                                                                                                                                                                                                                                                                                                                         | <input type="checkbox"/>                                                                                                                                                                                                                                                                                                                                                                                                                                                                                                                                                                                                                                                                                                                                                                                                                                                                                                                                                                                                                                                                                                                                                                                                                                                                                                                                                                                                                                                                                                                                                                                                                                                                                                                                                                                                                                                                                                                                                                                                                                                                                                                                                                                                                                                                                                                                                                                                                                      |  |            |           |           |    |                          |                          |                          |    |                          |                          |                          |    |                          |                          |                          |    |                          |                          |                          |    |                          |                          |                          |    |                          |                          |                          |    |                          |                          |                          |    |                          |                          |                          |    |                          |                          |                          |     |                          |                          |                          |     |                          |                          |                          |     |                          |                          |                          |     |                          |                          |                          |     |                          |                          |                          |     |                          |                          |                          |     |                          |                          |                          |     |                          |                          |                          |     |                          |                          |                          |
| S3.7   | During this pregnancy, did (you / the mother) take any drug to prevent (you / her) from getting malaria?                                                                                                                                                                                                                                                                                                                                     | 1. Yes<br>2. No<br>9. Don't know                                                                                                                                                                                                                                                                                                                                                                                                                                                                                                                                                                                                                                                                                                                                                                                                                                                                    | <input type="checkbox"/> 2 or 9 → VQ2.1                                                                                                                                                                                                                                                                                                                                                                                                                                                                                                                                                                                                                                                                                                                                                                                                                                                                                                                                                                                                                                                                                                                                                                                                                                                                                                                                                                                                                                                                                                                                                                                                                                                                                                                                                                                                                                                                                                                                                                                                                                                                                                                                                                                                                                                                                                                                                                                                                       |  |            |           |           |    |                          |                          |                          |    |                          |                          |                          |    |                          |                          |                          |    |                          |                          |                          |    |                          |                          |                          |    |                          |                          |                          |    |                          |                          |                          |    |                          |                          |                          |    |                          |                          |                          |     |                          |                          |                          |     |                          |                          |                          |     |                          |                          |                          |     |                          |                          |                          |     |                          |                          |                          |     |                          |                          |                          |     |                          |                          |                          |     |                          |                          |                          |     |                          |                          |                          |
| S3.7.1 | During this pregnancy, how many times did (you / she) take this drug?                                                                                                                                                                                                                                                                                                                                                                        |                                                                                                                                                                                                                                                                                                                                                                                                                                                                                                                                                                                                                                                                                                                                                                                                                                                                                                     | ___ ___ Times<br>(DK = 99)                                                                                                                                                                                                                                                                                                                                                                                                                                                                                                                                                                                                                                                                                                                                                                                                                                                                                                                                                                                                                                                                                                                                                                                                                                                                                                                                                                                                                                                                                                                                                                                                                                                                                                                                                                                                                                                                                                                                                                                                                                                                                                                                                                                                                                                                                                                                                                                                                                    |  |            |           |           |    |                          |                          |                          |    |                          |                          |                          |    |                          |                          |                          |    |                          |                          |                          |    |                          |                          |                          |    |                          |                          |                          |    |                          |                          |                          |    |                          |                          |                          |    |                          |                          |                          |     |                          |                          |                          |     |                          |                          |                          |     |                          |                          |                          |     |                          |                          |                          |     |                          |                          |                          |     |                          |                          |                          |     |                          |                          |                          |     |                          |                          |                          |     |                          |                          |                          |
| V2.1   | Now I'd like to ask you about any problems (you / the mother) might have had during the pregnancy. Was the late part of the pregnancy (defined as the last 3 months), labor or delivery complicated by any of the following problems that started <u>before</u> the baby was delivered?<br><br>[Read each complication and mark "Yes," "No" or "Don't know" for each.]<br><br>[Read "...the mother..." if the mother is not the respondent.] | <u>Did (you / the mother) have:</u><br>1. convulsions?.....<br>2. high blood pressure? .....<br>3. severe anemia or pallor <u>and</u> shortness of breath? .....<br>4. diabetes?.....<br>5. severe headache?.....<br>6. blurred vision?.....<br><u>(Were you / Was she):</u><br>7. too weak to get out of bed? .....<br><u>Did (you / the mother) have:</u><br>8. severe abdominal pain? .....<br>9. fast or difficult breathing? .....<br>10.puffy face?.....<br>11. <u>any</u> vaginal bleeding before labor?.....<br>12.excessive bleeding during labor or delivery? .....<br>13.fever? .....<br>14.smelly vaginal discharge? .....<br><u>Was the:</u> .....<br>15.child delivered not head first?<br>16.cord delivered first? .....<br>17.cord around the child's neck?.....<br><u>Did (you / the mother) have:</u><br>18.any other complication?<br><br>(specify the other complication) ..... | <table border="0"> <tr> <td></td> <td><u>Yes</u></td> <td><u>No</u></td> <td><u>DK</u></td> </tr> <tr> <td>1.</td> <td><input type="checkbox"/></td> <td><input type="checkbox"/></td> <td><input type="checkbox"/></td> </tr> <tr> <td>2.</td> <td><input type="checkbox"/></td> <td><input type="checkbox"/></td> <td><input type="checkbox"/></td> </tr> <tr> <td>3.</td> <td><input type="checkbox"/></td> <td><input type="checkbox"/></td> <td><input type="checkbox"/></td> </tr> <tr> <td>4.</td> <td><input type="checkbox"/></td> <td><input type="checkbox"/></td> <td><input type="checkbox"/></td> </tr> <tr> <td>5.</td> <td><input type="checkbox"/></td> <td><input type="checkbox"/></td> <td><input type="checkbox"/></td> </tr> <tr> <td>6.</td> <td><input type="checkbox"/></td> <td><input type="checkbox"/></td> <td><input type="checkbox"/></td> </tr> <tr> <td>7.</td> <td><input type="checkbox"/></td> <td><input type="checkbox"/></td> <td><input type="checkbox"/></td> </tr> <tr> <td>8.</td> <td><input type="checkbox"/></td> <td><input type="checkbox"/></td> <td><input type="checkbox"/></td> </tr> <tr> <td>9.</td> <td><input type="checkbox"/></td> <td><input type="checkbox"/></td> <td><input type="checkbox"/></td> </tr> <tr> <td>10.</td> <td><input type="checkbox"/></td> <td><input type="checkbox"/></td> <td><input type="checkbox"/></td> </tr> <tr> <td>11.</td> <td><input type="checkbox"/></td> <td><input type="checkbox"/></td> <td><input type="checkbox"/></td> </tr> <tr> <td>12.</td> <td><input type="checkbox"/></td> <td><input type="checkbox"/></td> <td><input type="checkbox"/></td> </tr> <tr> <td>13.</td> <td><input type="checkbox"/></td> <td><input type="checkbox"/></td> <td><input type="checkbox"/></td> </tr> <tr> <td>14.</td> <td><input type="checkbox"/></td> <td><input type="checkbox"/></td> <td><input type="checkbox"/></td> </tr> <tr> <td>15.</td> <td><input type="checkbox"/></td> <td><input type="checkbox"/></td> <td><input type="checkbox"/></td> </tr> <tr> <td>16.</td> <td><input type="checkbox"/></td> <td><input type="checkbox"/></td> <td><input type="checkbox"/></td> </tr> <tr> <td>17.</td> <td><input type="checkbox"/></td> <td><input type="checkbox"/></td> <td><input type="checkbox"/></td> </tr> <tr> <td>18.</td> <td><input type="checkbox"/></td> <td><input type="checkbox"/></td> <td><input type="checkbox"/></td> </tr> </table> |  | <u>Yes</u> | <u>No</u> | <u>DK</u> | 1. | <input type="checkbox"/> | <input type="checkbox"/> | <input type="checkbox"/> | 2. | <input type="checkbox"/> | <input type="checkbox"/> | <input type="checkbox"/> | 3. | <input type="checkbox"/> | <input type="checkbox"/> | <input type="checkbox"/> | 4. | <input type="checkbox"/> | <input type="checkbox"/> | <input type="checkbox"/> | 5. | <input type="checkbox"/> | <input type="checkbox"/> | <input type="checkbox"/> | 6. | <input type="checkbox"/> | <input type="checkbox"/> | <input type="checkbox"/> | 7. | <input type="checkbox"/> | <input type="checkbox"/> | <input type="checkbox"/> | 8. | <input type="checkbox"/> | <input type="checkbox"/> | <input type="checkbox"/> | 9. | <input type="checkbox"/> | <input type="checkbox"/> | <input type="checkbox"/> | 10. | <input type="checkbox"/> | <input type="checkbox"/> | <input type="checkbox"/> | 11. | <input type="checkbox"/> | <input type="checkbox"/> | <input type="checkbox"/> | 12. | <input type="checkbox"/> | <input type="checkbox"/> | <input type="checkbox"/> | 13. | <input type="checkbox"/> | <input type="checkbox"/> | <input type="checkbox"/> | 14. | <input type="checkbox"/> | <input type="checkbox"/> | <input type="checkbox"/> | 15. | <input type="checkbox"/> | <input type="checkbox"/> | <input type="checkbox"/> | 16. | <input type="checkbox"/> | <input type="checkbox"/> | <input type="checkbox"/> | 17. | <input type="checkbox"/> | <input type="checkbox"/> | <input type="checkbox"/> | 18. | <input type="checkbox"/> | <input type="checkbox"/> | <input type="checkbox"/> |
|        | <u>Yes</u>                                                                                                                                                                                                                                                                                                                                                                                                                                   | <u>No</u>                                                                                                                                                                                                                                                                                                                                                                                                                                                                                                                                                                                                                                                                                                                                                                                                                                                                                           | <u>DK</u>                                                                                                                                                                                                                                                                                                                                                                                                                                                                                                                                                                                                                                                                                                                                                                                                                                                                                                                                                                                                                                                                                                                                                                                                                                                                                                                                                                                                                                                                                                                                                                                                                                                                                                                                                                                                                                                                                                                                                                                                                                                                                                                                                                                                                                                                                                                                                                                                                                                     |  |            |           |           |    |                          |                          |                          |    |                          |                          |                          |    |                          |                          |                          |    |                          |                          |                          |    |                          |                          |                          |    |                          |                          |                          |    |                          |                          |                          |    |                          |                          |                          |    |                          |                          |                          |     |                          |                          |                          |     |                          |                          |                          |     |                          |                          |                          |     |                          |                          |                          |     |                          |                          |                          |     |                          |                          |                          |     |                          |                          |                          |     |                          |                          |                          |     |                          |                          |                          |
| 1.     | <input type="checkbox"/>                                                                                                                                                                                                                                                                                                                                                                                                                     | <input type="checkbox"/>                                                                                                                                                                                                                                                                                                                                                                                                                                                                                                                                                                                                                                                                                                                                                                                                                                                                            | <input type="checkbox"/>                                                                                                                                                                                                                                                                                                                                                                                                                                                                                                                                                                                                                                                                                                                                                                                                                                                                                                                                                                                                                                                                                                                                                                                                                                                                                                                                                                                                                                                                                                                                                                                                                                                                                                                                                                                                                                                                                                                                                                                                                                                                                                                                                                                                                                                                                                                                                                                                                                      |  |            |           |           |    |                          |                          |                          |    |                          |                          |                          |    |                          |                          |                          |    |                          |                          |                          |    |                          |                          |                          |    |                          |                          |                          |    |                          |                          |                          |    |                          |                          |                          |    |                          |                          |                          |     |                          |                          |                          |     |                          |                          |                          |     |                          |                          |                          |     |                          |                          |                          |     |                          |                          |                          |     |                          |                          |                          |     |                          |                          |                          |     |                          |                          |                          |     |                          |                          |                          |
| 2.     | <input type="checkbox"/>                                                                                                                                                                                                                                                                                                                                                                                                                     | <input type="checkbox"/>                                                                                                                                                                                                                                                                                                                                                                                                                                                                                                                                                                                                                                                                                                                                                                                                                                                                            | <input type="checkbox"/>                                                                                                                                                                                                                                                                                                                                                                                                                                                                                                                                                                                                                                                                                                                                                                                                                                                                                                                                                                                                                                                                                                                                                                                                                                                                                                                                                                                                                                                                                                                                                                                                                                                                                                                                                                                                                                                                                                                                                                                                                                                                                                                                                                                                                                                                                                                                                                                                                                      |  |            |           |           |    |                          |                          |                          |    |                          |                          |                          |    |                          |                          |                          |    |                          |                          |                          |    |                          |                          |                          |    |                          |                          |                          |    |                          |                          |                          |    |                          |                          |                          |    |                          |                          |                          |     |                          |                          |                          |     |                          |                          |                          |     |                          |                          |                          |     |                          |                          |                          |     |                          |                          |                          |     |                          |                          |                          |     |                          |                          |                          |     |                          |                          |                          |     |                          |                          |                          |
| 3.     | <input type="checkbox"/>                                                                                                                                                                                                                                                                                                                                                                                                                     | <input type="checkbox"/>                                                                                                                                                                                                                                                                                                                                                                                                                                                                                                                                                                                                                                                                                                                                                                                                                                                                            | <input type="checkbox"/>                                                                                                                                                                                                                                                                                                                                                                                                                                                                                                                                                                                                                                                                                                                                                                                                                                                                                                                                                                                                                                                                                                                                                                                                                                                                                                                                                                                                                                                                                                                                                                                                                                                                                                                                                                                                                                                                                                                                                                                                                                                                                                                                                                                                                                                                                                                                                                                                                                      |  |            |           |           |    |                          |                          |                          |    |                          |                          |                          |    |                          |                          |                          |    |                          |                          |                          |    |                          |                          |                          |    |                          |                          |                          |    |                          |                          |                          |    |                          |                          |                          |    |                          |                          |                          |     |                          |                          |                          |     |                          |                          |                          |     |                          |                          |                          |     |                          |                          |                          |     |                          |                          |                          |     |                          |                          |                          |     |                          |                          |                          |     |                          |                          |                          |     |                          |                          |                          |
| 4.     | <input type="checkbox"/>                                                                                                                                                                                                                                                                                                                                                                                                                     | <input type="checkbox"/>                                                                                                                                                                                                                                                                                                                                                                                                                                                                                                                                                                                                                                                                                                                                                                                                                                                                            | <input type="checkbox"/>                                                                                                                                                                                                                                                                                                                                                                                                                                                                                                                                                                                                                                                                                                                                                                                                                                                                                                                                                                                                                                                                                                                                                                                                                                                                                                                                                                                                                                                                                                                                                                                                                                                                                                                                                                                                                                                                                                                                                                                                                                                                                                                                                                                                                                                                                                                                                                                                                                      |  |            |           |           |    |                          |                          |                          |    |                          |                          |                          |    |                          |                          |                          |    |                          |                          |                          |    |                          |                          |                          |    |                          |                          |                          |    |                          |                          |                          |    |                          |                          |                          |    |                          |                          |                          |     |                          |                          |                          |     |                          |                          |                          |     |                          |                          |                          |     |                          |                          |                          |     |                          |                          |                          |     |                          |                          |                          |     |                          |                          |                          |     |                          |                          |                          |     |                          |                          |                          |
| 5.     | <input type="checkbox"/>                                                                                                                                                                                                                                                                                                                                                                                                                     | <input type="checkbox"/>                                                                                                                                                                                                                                                                                                                                                                                                                                                                                                                                                                                                                                                                                                                                                                                                                                                                            | <input type="checkbox"/>                                                                                                                                                                                                                                                                                                                                                                                                                                                                                                                                                                                                                                                                                                                                                                                                                                                                                                                                                                                                                                                                                                                                                                                                                                                                                                                                                                                                                                                                                                                                                                                                                                                                                                                                                                                                                                                                                                                                                                                                                                                                                                                                                                                                                                                                                                                                                                                                                                      |  |            |           |           |    |                          |                          |                          |    |                          |                          |                          |    |                          |                          |                          |    |                          |                          |                          |    |                          |                          |                          |    |                          |                          |                          |    |                          |                          |                          |    |                          |                          |                          |    |                          |                          |                          |     |                          |                          |                          |     |                          |                          |                          |     |                          |                          |                          |     |                          |                          |                          |     |                          |                          |                          |     |                          |                          |                          |     |                          |                          |                          |     |                          |                          |                          |     |                          |                          |                          |
| 6.     | <input type="checkbox"/>                                                                                                                                                                                                                                                                                                                                                                                                                     | <input type="checkbox"/>                                                                                                                                                                                                                                                                                                                                                                                                                                                                                                                                                                                                                                                                                                                                                                                                                                                                            | <input type="checkbox"/>                                                                                                                                                                                                                                                                                                                                                                                                                                                                                                                                                                                                                                                                                                                                                                                                                                                                                                                                                                                                                                                                                                                                                                                                                                                                                                                                                                                                                                                                                                                                                                                                                                                                                                                                                                                                                                                                                                                                                                                                                                                                                                                                                                                                                                                                                                                                                                                                                                      |  |            |           |           |    |                          |                          |                          |    |                          |                          |                          |    |                          |                          |                          |    |                          |                          |                          |    |                          |                          |                          |    |                          |                          |                          |    |                          |                          |                          |    |                          |                          |                          |    |                          |                          |                          |     |                          |                          |                          |     |                          |                          |                          |     |                          |                          |                          |     |                          |                          |                          |     |                          |                          |                          |     |                          |                          |                          |     |                          |                          |                          |     |                          |                          |                          |     |                          |                          |                          |
| 7.     | <input type="checkbox"/>                                                                                                                                                                                                                                                                                                                                                                                                                     | <input type="checkbox"/>                                                                                                                                                                                                                                                                                                                                                                                                                                                                                                                                                                                                                                                                                                                                                                                                                                                                            | <input type="checkbox"/>                                                                                                                                                                                                                                                                                                                                                                                                                                                                                                                                                                                                                                                                                                                                                                                                                                                                                                                                                                                                                                                                                                                                                                                                                                                                                                                                                                                                                                                                                                                                                                                                                                                                                                                                                                                                                                                                                                                                                                                                                                                                                                                                                                                                                                                                                                                                                                                                                                      |  |            |           |           |    |                          |                          |                          |    |                          |                          |                          |    |                          |                          |                          |    |                          |                          |                          |    |                          |                          |                          |    |                          |                          |                          |    |                          |                          |                          |    |                          |                          |                          |    |                          |                          |                          |     |                          |                          |                          |     |                          |                          |                          |     |                          |                          |                          |     |                          |                          |                          |     |                          |                          |                          |     |                          |                          |                          |     |                          |                          |                          |     |                          |                          |                          |     |                          |                          |                          |
| 8.     | <input type="checkbox"/>                                                                                                                                                                                                                                                                                                                                                                                                                     | <input type="checkbox"/>                                                                                                                                                                                                                                                                                                                                                                                                                                                                                                                                                                                                                                                                                                                                                                                                                                                                            | <input type="checkbox"/>                                                                                                                                                                                                                                                                                                                                                                                                                                                                                                                                                                                                                                                                                                                                                                                                                                                                                                                                                                                                                                                                                                                                                                                                                                                                                                                                                                                                                                                                                                                                                                                                                                                                                                                                                                                                                                                                                                                                                                                                                                                                                                                                                                                                                                                                                                                                                                                                                                      |  |            |           |           |    |                          |                          |                          |    |                          |                          |                          |    |                          |                          |                          |    |                          |                          |                          |    |                          |                          |                          |    |                          |                          |                          |    |                          |                          |                          |    |                          |                          |                          |    |                          |                          |                          |     |                          |                          |                          |     |                          |                          |                          |     |                          |                          |                          |     |                          |                          |                          |     |                          |                          |                          |     |                          |                          |                          |     |                          |                          |                          |     |                          |                          |                          |     |                          |                          |                          |
| 9.     | <input type="checkbox"/>                                                                                                                                                                                                                                                                                                                                                                                                                     | <input type="checkbox"/>                                                                                                                                                                                                                                                                                                                                                                                                                                                                                                                                                                                                                                                                                                                                                                                                                                                                            | <input type="checkbox"/>                                                                                                                                                                                                                                                                                                                                                                                                                                                                                                                                                                                                                                                                                                                                                                                                                                                                                                                                                                                                                                                                                                                                                                                                                                                                                                                                                                                                                                                                                                                                                                                                                                                                                                                                                                                                                                                                                                                                                                                                                                                                                                                                                                                                                                                                                                                                                                                                                                      |  |            |           |           |    |                          |                          |                          |    |                          |                          |                          |    |                          |                          |                          |    |                          |                          |                          |    |                          |                          |                          |    |                          |                          |                          |    |                          |                          |                          |    |                          |                          |                          |    |                          |                          |                          |     |                          |                          |                          |     |                          |                          |                          |     |                          |                          |                          |     |                          |                          |                          |     |                          |                          |                          |     |                          |                          |                          |     |                          |                          |                          |     |                          |                          |                          |     |                          |                          |                          |
| 10.    | <input type="checkbox"/>                                                                                                                                                                                                                                                                                                                                                                                                                     | <input type="checkbox"/>                                                                                                                                                                                                                                                                                                                                                                                                                                                                                                                                                                                                                                                                                                                                                                                                                                                                            | <input type="checkbox"/>                                                                                                                                                                                                                                                                                                                                                                                                                                                                                                                                                                                                                                                                                                                                                                                                                                                                                                                                                                                                                                                                                                                                                                                                                                                                                                                                                                                                                                                                                                                                                                                                                                                                                                                                                                                                                                                                                                                                                                                                                                                                                                                                                                                                                                                                                                                                                                                                                                      |  |            |           |           |    |                          |                          |                          |    |                          |                          |                          |    |                          |                          |                          |    |                          |                          |                          |    |                          |                          |                          |    |                          |                          |                          |    |                          |                          |                          |    |                          |                          |                          |    |                          |                          |                          |     |                          |                          |                          |     |                          |                          |                          |     |                          |                          |                          |     |                          |                          |                          |     |                          |                          |                          |     |                          |                          |                          |     |                          |                          |                          |     |                          |                          |                          |     |                          |                          |                          |
| 11.    | <input type="checkbox"/>                                                                                                                                                                                                                                                                                                                                                                                                                     | <input type="checkbox"/>                                                                                                                                                                                                                                                                                                                                                                                                                                                                                                                                                                                                                                                                                                                                                                                                                                                                            | <input type="checkbox"/>                                                                                                                                                                                                                                                                                                                                                                                                                                                                                                                                                                                                                                                                                                                                                                                                                                                                                                                                                                                                                                                                                                                                                                                                                                                                                                                                                                                                                                                                                                                                                                                                                                                                                                                                                                                                                                                                                                                                                                                                                                                                                                                                                                                                                                                                                                                                                                                                                                      |  |            |           |           |    |                          |                          |                          |    |                          |                          |                          |    |                          |                          |                          |    |                          |                          |                          |    |                          |                          |                          |    |                          |                          |                          |    |                          |                          |                          |    |                          |                          |                          |    |                          |                          |                          |     |                          |                          |                          |     |                          |                          |                          |     |                          |                          |                          |     |                          |                          |                          |     |                          |                          |                          |     |                          |                          |                          |     |                          |                          |                          |     |                          |                          |                          |     |                          |                          |                          |
| 12.    | <input type="checkbox"/>                                                                                                                                                                                                                                                                                                                                                                                                                     | <input type="checkbox"/>                                                                                                                                                                                                                                                                                                                                                                                                                                                                                                                                                                                                                                                                                                                                                                                                                                                                            | <input type="checkbox"/>                                                                                                                                                                                                                                                                                                                                                                                                                                                                                                                                                                                                                                                                                                                                                                                                                                                                                                                                                                                                                                                                                                                                                                                                                                                                                                                                                                                                                                                                                                                                                                                                                                                                                                                                                                                                                                                                                                                                                                                                                                                                                                                                                                                                                                                                                                                                                                                                                                      |  |            |           |           |    |                          |                          |                          |    |                          |                          |                          |    |                          |                          |                          |    |                          |                          |                          |    |                          |                          |                          |    |                          |                          |                          |    |                          |                          |                          |    |                          |                          |                          |    |                          |                          |                          |     |                          |                          |                          |     |                          |                          |                          |     |                          |                          |                          |     |                          |                          |                          |     |                          |                          |                          |     |                          |                          |                          |     |                          |                          |                          |     |                          |                          |                          |     |                          |                          |                          |
| 13.    | <input type="checkbox"/>                                                                                                                                                                                                                                                                                                                                                                                                                     | <input type="checkbox"/>                                                                                                                                                                                                                                                                                                                                                                                                                                                                                                                                                                                                                                                                                                                                                                                                                                                                            | <input type="checkbox"/>                                                                                                                                                                                                                                                                                                                                                                                                                                                                                                                                                                                                                                                                                                                                                                                                                                                                                                                                                                                                                                                                                                                                                                                                                                                                                                                                                                                                                                                                                                                                                                                                                                                                                                                                                                                                                                                                                                                                                                                                                                                                                                                                                                                                                                                                                                                                                                                                                                      |  |            |           |           |    |                          |                          |                          |    |                          |                          |                          |    |                          |                          |                          |    |                          |                          |                          |    |                          |                          |                          |    |                          |                          |                          |    |                          |                          |                          |    |                          |                          |                          |    |                          |                          |                          |     |                          |                          |                          |     |                          |                          |                          |     |                          |                          |                          |     |                          |                          |                          |     |                          |                          |                          |     |                          |                          |                          |     |                          |                          |                          |     |                          |                          |                          |     |                          |                          |                          |
| 14.    | <input type="checkbox"/>                                                                                                                                                                                                                                                                                                                                                                                                                     | <input type="checkbox"/>                                                                                                                                                                                                                                                                                                                                                                                                                                                                                                                                                                                                                                                                                                                                                                                                                                                                            | <input type="checkbox"/>                                                                                                                                                                                                                                                                                                                                                                                                                                                                                                                                                                                                                                                                                                                                                                                                                                                                                                                                                                                                                                                                                                                                                                                                                                                                                                                                                                                                                                                                                                                                                                                                                                                                                                                                                                                                                                                                                                                                                                                                                                                                                                                                                                                                                                                                                                                                                                                                                                      |  |            |           |           |    |                          |                          |                          |    |                          |                          |                          |    |                          |                          |                          |    |                          |                          |                          |    |                          |                          |                          |    |                          |                          |                          |    |                          |                          |                          |    |                          |                          |                          |    |                          |                          |                          |     |                          |                          |                          |     |                          |                          |                          |     |                          |                          |                          |     |                          |                          |                          |     |                          |                          |                          |     |                          |                          |                          |     |                          |                          |                          |     |                          |                          |                          |     |                          |                          |                          |
| 15.    | <input type="checkbox"/>                                                                                                                                                                                                                                                                                                                                                                                                                     | <input type="checkbox"/>                                                                                                                                                                                                                                                                                                                                                                                                                                                                                                                                                                                                                                                                                                                                                                                                                                                                            | <input type="checkbox"/>                                                                                                                                                                                                                                                                                                                                                                                                                                                                                                                                                                                                                                                                                                                                                                                                                                                                                                                                                                                                                                                                                                                                                                                                                                                                                                                                                                                                                                                                                                                                                                                                                                                                                                                                                                                                                                                                                                                                                                                                                                                                                                                                                                                                                                                                                                                                                                                                                                      |  |            |           |           |    |                          |                          |                          |    |                          |                          |                          |    |                          |                          |                          |    |                          |                          |                          |    |                          |                          |                          |    |                          |                          |                          |    |                          |                          |                          |    |                          |                          |                          |    |                          |                          |                          |     |                          |                          |                          |     |                          |                          |                          |     |                          |                          |                          |     |                          |                          |                          |     |                          |                          |                          |     |                          |                          |                          |     |                          |                          |                          |     |                          |                          |                          |     |                          |                          |                          |
| 16.    | <input type="checkbox"/>                                                                                                                                                                                                                                                                                                                                                                                                                     | <input type="checkbox"/>                                                                                                                                                                                                                                                                                                                                                                                                                                                                                                                                                                                                                                                                                                                                                                                                                                                                            | <input type="checkbox"/>                                                                                                                                                                                                                                                                                                                                                                                                                                                                                                                                                                                                                                                                                                                                                                                                                                                                                                                                                                                                                                                                                                                                                                                                                                                                                                                                                                                                                                                                                                                                                                                                                                                                                                                                                                                                                                                                                                                                                                                                                                                                                                                                                                                                                                                                                                                                                                                                                                      |  |            |           |           |    |                          |                          |                          |    |                          |                          |                          |    |                          |                          |                          |    |                          |                          |                          |    |                          |                          |                          |    |                          |                          |                          |    |                          |                          |                          |    |                          |                          |                          |    |                          |                          |                          |     |                          |                          |                          |     |                          |                          |                          |     |                          |                          |                          |     |                          |                          |                          |     |                          |                          |                          |     |                          |                          |                          |     |                          |                          |                          |     |                          |                          |                          |     |                          |                          |                          |
| 17.    | <input type="checkbox"/>                                                                                                                                                                                                                                                                                                                                                                                                                     | <input type="checkbox"/>                                                                                                                                                                                                                                                                                                                                                                                                                                                                                                                                                                                                                                                                                                                                                                                                                                                                            | <input type="checkbox"/>                                                                                                                                                                                                                                                                                                                                                                                                                                                                                                                                                                                                                                                                                                                                                                                                                                                                                                                                                                                                                                                                                                                                                                                                                                                                                                                                                                                                                                                                                                                                                                                                                                                                                                                                                                                                                                                                                                                                                                                                                                                                                                                                                                                                                                                                                                                                                                                                                                      |  |            |           |           |    |                          |                          |                          |    |                          |                          |                          |    |                          |                          |                          |    |                          |                          |                          |    |                          |                          |                          |    |                          |                          |                          |    |                          |                          |                          |    |                          |                          |                          |    |                          |                          |                          |     |                          |                          |                          |     |                          |                          |                          |     |                          |                          |                          |     |                          |                          |                          |     |                          |                          |                          |     |                          |                          |                          |     |                          |                          |                          |     |                          |                          |                          |     |                          |                          |                          |
| 18.    | <input type="checkbox"/>                                                                                                                                                                                                                                                                                                                                                                                                                     | <input type="checkbox"/>                                                                                                                                                                                                                                                                                                                                                                                                                                                                                                                                                                                                                                                                                                                                                                                                                                                                            | <input type="checkbox"/>                                                                                                                                                                                                                                                                                                                                                                                                                                                                                                                                                                                                                                                                                                                                                                                                                                                                                                                                                                                                                                                                                                                                                                                                                                                                                                                                                                                                                                                                                                                                                                                                                                                                                                                                                                                                                                                                                                                                                                                                                                                                                                                                                                                                                                                                                                                                                                                                                                      |  |            |           |           |    |                          |                          |                          |    |                          |                          |                          |    |                          |                          |                          |    |                          |                          |                          |    |                          |                          |                          |    |                          |                          |                          |    |                          |                          |                          |    |                          |                          |                          |    |                          |                          |                          |     |                          |                          |                          |     |                          |                          |                          |     |                          |                          |                          |     |                          |                          |                          |     |                          |                          |                          |     |                          |                          |                          |     |                          |                          |                          |     |                          |                          |                          |     |                          |                          |                          |
| V2.2A  | Did (you / the mother) have any of the following problems that started <u>after</u> the delivery?<br><br>[Read each complication and mark "Yes," "No" or "Don't know" for each.]<br><br>[Read "...the mother..." if the mother is not the respondent.]                                                                                                                                                                                       | <u>Did (you / the mother) have:</u><br>1. convulsions?.....<br>2. heavy bleeding? .....<br>3. Fever with smelly vaginal discharge or abdominal pain? .....                                                                                                                                                                                                                                                                                                                                                                                                                                                                                                                                                                                                                                                                                                                                          | <table border="0"> <tr> <td></td> <td><u>Yes</u></td> <td><u>No</u></td> <td><u>DK</u></td> </tr> <tr> <td>1.</td> <td><input type="checkbox"/></td> <td><input type="checkbox"/></td> <td><input type="checkbox"/></td> </tr> <tr> <td>2.</td> <td><input type="checkbox"/></td> <td><input type="checkbox"/></td> <td><input type="checkbox"/></td> </tr> <tr> <td>3.</td> <td><input type="checkbox"/></td> <td><input type="checkbox"/></td> <td><input type="checkbox"/></td> </tr> </table>                                                                                                                                                                                                                                                                                                                                                                                                                                                                                                                                                                                                                                                                                                                                                                                                                                                                                                                                                                                                                                                                                                                                                                                                                                                                                                                                                                                                                                                                                                                                                                                                                                                                                                                                                                                                                                                                                                                                                             |  | <u>Yes</u> | <u>No</u> | <u>DK</u> | 1. | <input type="checkbox"/> | <input type="checkbox"/> | <input type="checkbox"/> | 2. | <input type="checkbox"/> | <input type="checkbox"/> | <input type="checkbox"/> | 3. | <input type="checkbox"/> | <input type="checkbox"/> | <input type="checkbox"/> |    |                          |                          |                          |    |                          |                          |                          |    |                          |                          |                          |    |                          |                          |                          |    |                          |                          |                          |    |                          |                          |                          |     |                          |                          |                          |     |                          |                          |                          |     |                          |                          |                          |     |                          |                          |                          |     |                          |                          |                          |     |                          |                          |                          |     |                          |                          |                          |     |                          |                          |                          |     |                          |                          |                          |
|        | <u>Yes</u>                                                                                                                                                                                                                                                                                                                                                                                                                                   | <u>No</u>                                                                                                                                                                                                                                                                                                                                                                                                                                                                                                                                                                                                                                                                                                                                                                                                                                                                                           | <u>DK</u>                                                                                                                                                                                                                                                                                                                                                                                                                                                                                                                                                                                                                                                                                                                                                                                                                                                                                                                                                                                                                                                                                                                                                                                                                                                                                                                                                                                                                                                                                                                                                                                                                                                                                                                                                                                                                                                                                                                                                                                                                                                                                                                                                                                                                                                                                                                                                                                                                                                     |  |            |           |           |    |                          |                          |                          |    |                          |                          |                          |    |                          |                          |                          |    |                          |                          |                          |    |                          |                          |                          |    |                          |                          |                          |    |                          |                          |                          |    |                          |                          |                          |    |                          |                          |                          |     |                          |                          |                          |     |                          |                          |                          |     |                          |                          |                          |     |                          |                          |                          |     |                          |                          |                          |     |                          |                          |                          |     |                          |                          |                          |     |                          |                          |                          |     |                          |                          |                          |
| 1.     | <input type="checkbox"/>                                                                                                                                                                                                                                                                                                                                                                                                                     | <input type="checkbox"/>                                                                                                                                                                                                                                                                                                                                                                                                                                                                                                                                                                                                                                                                                                                                                                                                                                                                            | <input type="checkbox"/>                                                                                                                                                                                                                                                                                                                                                                                                                                                                                                                                                                                                                                                                                                                                                                                                                                                                                                                                                                                                                                                                                                                                                                                                                                                                                                                                                                                                                                                                                                                                                                                                                                                                                                                                                                                                                                                                                                                                                                                                                                                                                                                                                                                                                                                                                                                                                                                                                                      |  |            |           |           |    |                          |                          |                          |    |                          |                          |                          |    |                          |                          |                          |    |                          |                          |                          |    |                          |                          |                          |    |                          |                          |                          |    |                          |                          |                          |    |                          |                          |                          |    |                          |                          |                          |     |                          |                          |                          |     |                          |                          |                          |     |                          |                          |                          |     |                          |                          |                          |     |                          |                          |                          |     |                          |                          |                          |     |                          |                          |                          |     |                          |                          |                          |     |                          |                          |                          |
| 2.     | <input type="checkbox"/>                                                                                                                                                                                                                                                                                                                                                                                                                     | <input type="checkbox"/>                                                                                                                                                                                                                                                                                                                                                                                                                                                                                                                                                                                                                                                                                                                                                                                                                                                                            | <input type="checkbox"/>                                                                                                                                                                                                                                                                                                                                                                                                                                                                                                                                                                                                                                                                                                                                                                                                                                                                                                                                                                                                                                                                                                                                                                                                                                                                                                                                                                                                                                                                                                                                                                                                                                                                                                                                                                                                                                                                                                                                                                                                                                                                                                                                                                                                                                                                                                                                                                                                                                      |  |            |           |           |    |                          |                          |                          |    |                          |                          |                          |    |                          |                          |                          |    |                          |                          |                          |    |                          |                          |                          |    |                          |                          |                          |    |                          |                          |                          |    |                          |                          |                          |    |                          |                          |                          |     |                          |                          |                          |     |                          |                          |                          |     |                          |                          |                          |     |                          |                          |                          |     |                          |                          |                          |     |                          |                          |                          |     |                          |                          |                          |     |                          |                          |                          |     |                          |                          |                          |
| 3.     | <input type="checkbox"/>                                                                                                                                                                                                                                                                                                                                                                                                                     | <input type="checkbox"/>                                                                                                                                                                                                                                                                                                                                                                                                                                                                                                                                                                                                                                                                                                                                                                                                                                                                            | <input type="checkbox"/>                                                                                                                                                                                                                                                                                                                                                                                                                                                                                                                                                                                                                                                                                                                                                                                                                                                                                                                                                                                                                                                                                                                                                                                                                                                                                                                                                                                                                                                                                                                                                                                                                                                                                                                                                                                                                                                                                                                                                                                                                                                                                                                                                                                                                                                                                                                                                                                                                                      |  |            |           |           |    |                          |                          |                          |    |                          |                          |                          |    |                          |                          |                          |    |                          |                          |                          |    |                          |                          |                          |    |                          |                          |                          |    |                          |                          |                          |    |                          |                          |                          |    |                          |                          |                          |     |                          |                          |                          |     |                          |                          |                          |     |                          |                          |                          |     |                          |                          |                          |     |                          |                          |                          |     |                          |                          |                          |     |                          |                          |                          |     |                          |                          |                          |     |                          |                          |                          |
| V2.2   | How many months long was the pregnancy?                                                                                                                                                                                                                                                                                                                                                                                                      |                                                                                                                                                                                                                                                                                                                                                                                                                                                                                                                                                                                                                                                                                                                                                                                                                                                                                                     | ___ Months ≠ 99 → VQ2.4<br>(DK = 99)                                                                                                                                                                                                                                                                                                                                                                                                                                                                                                                                                                                                                                                                                                                                                                                                                                                                                                                                                                                                                                                                                                                                                                                                                                                                                                                                                                                                                                                                                                                                                                                                                                                                                                                                                                                                                                                                                                                                                                                                                                                                                                                                                                                                                                                                                                                                                                                                                          |  |            |           |           |    |                          |                          |                          |    |                          |                          |                          |    |                          |                          |                          |    |                          |                          |                          |    |                          |                          |                          |    |                          |                          |                          |    |                          |                          |                          |    |                          |                          |                          |    |                          |                          |                          |     |                          |                          |                          |     |                          |                          |                          |     |                          |                          |                          |     |                          |                          |                          |     |                          |                          |                          |     |                          |                          |                          |     |                          |                          |                          |     |                          |                          |                          |     |                          |                          |                          |

Study ID#

|                 |  |  |  |    |  |       |  |  |  |
|-----------------|--|--|--|----|--|-------|--|--|--|
|                 |  |  |  |    |  |       |  |  |  |
| Village/Cluster |  |  |  | HH |  | Child |  |  |  |

**CHILD HEALTH EPIDEMIOLOGY REFERENCE GROUP  
SB/NN/CHILD VERBAL/SOCIAL AUTOPSY QUESTIONNAIRE**

|       |                                                                                                                                                                                                                                                                                                                                                                                                                                                                                                      |                                                                                                                                                             |                                                                                                      |
|-------|------------------------------------------------------------------------------------------------------------------------------------------------------------------------------------------------------------------------------------------------------------------------------------------------------------------------------------------------------------------------------------------------------------------------------------------------------------------------------------------------------|-------------------------------------------------------------------------------------------------------------------------------------------------------------|------------------------------------------------------------------------------------------------------|
| V2.3  | Did the pregnancy end early, on time, or late?                                                                                                                                                                                                                                                                                                                                                                                                                                                       | 1. Early<br>2. On time<br>3. Late<br>9. Don't know                                                                                                          | <input type="checkbox"/>                                                                             |
| V2.4  | Was the baby moving in the last few days before the birth?                                                                                                                                                                                                                                                                                                                                                                                                                                           | 1. Yes<br>2. No<br>9. Don't know                                                                                                                            | <input type="checkbox"/>                                                                             |
| V2.5  | When did (you / the mother) last feel the baby move?<br><i>[Read "...the mother..." if the mother is not the respondent.]</i><br><i>[Record hours if less than 24 hours; Record days if 1 day or more.]</i>                                                                                                                                                                                                                                                                                          |                                                                                                                                                             | <p>____ Hours before delivery<br/>(DK = 99)</p> <hr/> <p>____ Days before delivery<br/>(DK = 99)</p> |
| V2.6  | Did the water break before labor or during labor?<br><i>[Note: Labor begins when contractions are no more than 20 minutes apart.]</i>                                                                                                                                                                                                                                                                                                                                                                | 1. Before<br>2. During<br>9. Don't know                                                                                                                     | <input type="checkbox"/> 2 or 9 → VQ2.8                                                              |
| V2.7  | How much time before labor did the water break?<br><i>[Record "24" if 1 day or more.]</i>                                                                                                                                                                                                                                                                                                                                                                                                            |                                                                                                                                                             | ____ Hours<br>(DK = 99)                                                                              |
| V2.8  | What was the color of the liquor when the water broke?                                                                                                                                                                                                                                                                                                                                                                                                                                               | 1. Green or brown<br>2. Clear (normal)<br>3. Other (specify).....<br>9. Don't know                                                                          | <input type="checkbox"/><br>_____                                                                    |
| V2.9  | Was the liquor foul smelling?                                                                                                                                                                                                                                                                                                                                                                                                                                                                        | 1. Yes<br>2. No<br>9. Don't know                                                                                                                            | <input type="checkbox"/>                                                                             |
| V2.10 | How much time did the labor and delivery take?<br><i>[Record "00" if less than 1 hour.]</i>                                                                                                                                                                                                                                                                                                                                                                                                          |                                                                                                                                                             | ____ Hours<br>(DK = 99)                                                                              |
| S3.8  | Where did the delivery occur?                                                                                                                                                                                                                                                                                                                                                                                                                                                                        | 1. Hospital<br>2. Other health provider or facility<br>3. On route to a health provider or facility<br>4. Home<br>5. Other (specify _____)<br>9. Don't know | <input type="checkbox"/> 1-3 = Health provider<br>9 → SQ3.11                                         |
| S3.9  | Who decided that this was the right place to deliver the baby?<br><i>[Record the one main decision maker.]</i>                                                                                                                                                                                                                                                                                                                                                                                       | 1. The woman, herself<br>2. Her husband<br>3. Her mother<br>4. Her mother-in-law<br>5. Her father-in-law<br>6. Other (specify).....<br>9. Don't know        | <input type="checkbox"/><br>_____                                                                    |
| S3.10 | <i>If she did <u>not</u> go to a health provider or facility (SQ3.8 = 4-5) for the delivery, ask: Did (you / the mother) have any concerns or problems that kept (you / her) from going to a health provider or facility for the delivery?</i><br><br><i>If she <u>went</u> or <u>was on route</u> to a health provider or facility (SQ3.8 = 1-3) for the delivery, ask: Did (you / the mother) have to overcome any concerns or problems to go to health provider or facility for the delivery?</i> | 1. Yes<br>2. No<br>9. Don't know                                                                                                                            | <input type="checkbox"/> 2 or 9 → SQ3.11                                                             |

Study ID#

|                 |  |  |  |    |  |       |  |  |  |
|-----------------|--|--|--|----|--|-------|--|--|--|
|                 |  |  |  |    |  |       |  |  |  |
| Village/Cluster |  |  |  | HH |  | Child |  |  |  |

**CHILD HEALTH EPIDEMIOLOGY REFERENCE GROUP  
SB/NN/CHILD VERBAL/SOCIAL AUTOPSY QUESTIONNAIRE**

|             |                                                                                                                                                                                                                                                                      |                                                                                                                                                                                                                                                                                                                                                                                                                                                                                                                                                                                                                                                                                                                                                                                                                                                             |                                                                                                                                                                                                                                                                                                                                                                                                                                                                                                                                                                                                                                       |
|-------------|----------------------------------------------------------------------------------------------------------------------------------------------------------------------------------------------------------------------------------------------------------------------|-------------------------------------------------------------------------------------------------------------------------------------------------------------------------------------------------------------------------------------------------------------------------------------------------------------------------------------------------------------------------------------------------------------------------------------------------------------------------------------------------------------------------------------------------------------------------------------------------------------------------------------------------------------------------------------------------------------------------------------------------------------------------------------------------------------------------------------------------------------|---------------------------------------------------------------------------------------------------------------------------------------------------------------------------------------------------------------------------------------------------------------------------------------------------------------------------------------------------------------------------------------------------------------------------------------------------------------------------------------------------------------------------------------------------------------------------------------------------------------------------------------|
| S3.10.<br>1 | <p>What concerns or problems did (you / she) have?</p> <p><i>Prompt: Was there anything else?</i></p> <p><i>[Multiple answers allowed.]</i></p>                                                                                                                      | <ol style="list-style-type: none"> <li>1. Did not think she was sick enough to need health care.....</li> <li>2. No one available to go with her .....</li> <li>3. Too much time from her regular duties...</li> <li>4. Someone else had to decide (<i>specify</i>)....</li> <li>5. Too far to travel .....</li> <li>6. No transportation available.....</li> <li>7. Cost (transport, health care, other).....</li> <li>8. Not satisfied with available health care...</li> <li>9. Symptom(s) required traditional care.....</li> <li>10. Thought she was too sick to travel.....</li> <li>11. Thought she/baby will die despite care.</li> <li>12. Was late at night (transportation or provider not available) .....</li> <li>13. Fears exposure to male health provider</li> <li>14. Other (<i>specify</i>).....</li> <li>99. Don't know.....</li> </ol> | <ol style="list-style-type: none"> <li>1. <input type="checkbox"/></li> <li>2. <input type="checkbox"/></li> <li>3. <input type="checkbox"/></li> <li>4. <input type="checkbox"/> _____</li> <li>5. <input type="checkbox"/></li> <li>6. <input type="checkbox"/></li> <li>7. <input type="checkbox"/></li> <li>8. <input type="checkbox"/></li> <li>9. <input type="checkbox"/></li> <li>10. <input type="checkbox"/></li> <li>11. <input type="checkbox"/></li> <li>12. <input type="checkbox"/></li> <li>13. <input type="checkbox"/></li> <li>14. <input type="checkbox"/> _____</li> <li>99. <input type="checkbox"/></li> </ol> |
| S3.11       | <p>Who (at the facility) delivered the baby?</p> <p><i>[Read "...at the facility..." if she delivered at a health facility.]</i></p>                                                                                                                                 | <ol style="list-style-type: none"> <li>1. Doctor</li> <li>2. Nurse/midwife</li> <li>3. Relative/neighbor/friend</li> <li>4. Self (the mother)</li> <li>5. Traditional birth attendant</li> <li>6. Other (<i>specify</i>).....</li> <li>9. Don't know</li> </ol>                                                                                                                                                                                                                                                                                                                                                                                                                                                                                                                                                                                             | <input type="checkbox"/><br><br>_____                                                                                                                                                                                                                                                                                                                                                                                                                                                                                                                                                                                                 |
| S3.12       | <p>How soon after labor started did the &lt;BIRTH ATTENDANT&gt; first attend the mother?</p> <p><i>[Discuss that labor starts with painful contractions every 20 minutes or less.]</i></p> <p><i>[Mark days &amp;/or hours as needed: e.g. 00 day, 06 hours]</i></p> |                                                                                                                                                                                                                                                                                                                                                                                                                                                                                                                                                                                                                                                                                                                                                                                                                                                             | <p>____ Days<br/>(DK = 99)</p> <hr/> <p>____ Hours<br/>(DK = 99)</p>                                                                                                                                                                                                                                                                                                                                                                                                                                                                                                                                                                  |
| S3.13       | <p>Did the birth attendant use a pictorial graph to follow the progress of (your / the mother's) labor?</p>                                                                                                                                                          | <ol style="list-style-type: none"> <li>1. Yes</li> <li>2. No</li> <li>9. Don't know</li> </ol>                                                                                                                                                                                                                                                                                                                                                                                                                                                                                                                                                                                                                                                                                                                                                              | <input type="checkbox"/>                                                                                                                                                                                                                                                                                                                                                                                                                                                                                                                                                                                                              |
| S3.14       | <p>Did the birth attendant wash her hands with soap and water or wear surgical gloves before assisting with the birth?</p>                                                                                                                                           | <ol style="list-style-type: none"> <li>1. Yes, washed with soap and water</li> <li>2. Yes, wore surgical gloves</li> <li>3. No</li> <li>9. Don't know</li> </ol>                                                                                                                                                                                                                                                                                                                                                                                                                                                                                                                                                                                                                                                                                            | <input type="checkbox"/>                                                                                                                                                                                                                                                                                                                                                                                                                                                                                                                                                                                                              |
| S3.15       | <p>On what surface did (you / the mother) deliver?</p>                                                                                                                                                                                                               | <ol style="list-style-type: none"> <li>1. Labor bed</li> <li>2. Solid floor with mackintosh/cover</li> <li>3. Solid washed floor</li> <li>4. Solid unwashed floor</li> <li>5. Dirt/soil/mud/straw floor</li> <li>6. Other (<i>specify</i>).....</li> <li>9. Don't know</li> </ol>                                                                                                                                                                                                                                                                                                                                                                                                                                                                                                                                                                           | <input type="checkbox"/><br><br>_____                                                                                                                                                                                                                                                                                                                                                                                                                                                                                                                                                                                                 |
| V2.17       | <p>Was the delivery...?</p> <p><i>[Read the choices and mark ONE.]</i></p>                                                                                                                                                                                           | <ol style="list-style-type: none"> <li>1. Vaginal with forceps</li> <li>2. Vaginal without forceps</li> <li>3. Vaginal (don't know)</li> <li>4. C-section</li> <li>9. Don't know</li> </ol>                                                                                                                                                                                                                                                                                                                                                                                                                                                                                                                                                                                                                                                                 | <input type="checkbox"/>                                                                                                                                                                                                                                                                                                                                                                                                                                                                                                                                                                                                              |
| V2.18       | <p>During labor but before delivery, did (you / the mother) receive any kind of injection?</p> <p><i>[Read "...the mother..." if the mother is not the respondent.]</i></p>                                                                                          | <ol style="list-style-type: none"> <li>1. Yes</li> <li>2. No</li> <li>9. Don't know</li> </ol>                                                                                                                                                                                                                                                                                                                                                                                                                                                                                                                                                                                                                                                                                                                                                              | <input type="checkbox"/>                                                                                                                                                                                                                                                                                                                                                                                                                                                                                                                                                                                                              |

**SA Module 4: Careseeking for maternal complications (FOR STILLBIRTHS AND NN DEATHS < 28 DAYS OLD)**

Read: Now, I would like to ask you some questions about (your / the mother's) careseeking during the pregnancy with <NAME>.

| <b>S4.1</b>                                                               | <p><b>Maternal symptoms:</b></p> <p><i>First look back at the maternal VA symptoms in VQ2.1 (options 1-14), 2.2, 2.7 and 2.10 (options 15-17). Mark ("X") these in the "Symptoms in the last 3 months" column.</i></p> <p><i>If she had any symptom(s), then read: Earlier, you mentioned that (you / the mother) had &lt;SYMPTOM(S)&gt; during the last 3 months of the pregnancy or during labor or delivery. Which of the symptoms started <u>before</u> labor? And which started <u>with or during</u> labor or delivery, including any that may have brought on the labor?</i></p> <p><i>[Remind the respondent that labor starts with painful contractions every 20 minutes or less. Then review each reported symptom with her to determine which started <u>before</u> labor and which started <u>with or during</u> labor or delivery. Do not include any symptoms here that started after the baby was delivered.]</i></p> | <table style="width: 100%;"> <tr> <td>1. Convulsions.....</td><td><input type="checkbox"/></td> </tr> <tr> <td>2. High blood pressure .....</td><td><input type="checkbox"/></td> </tr> <tr> <td>3. Severe anemia or (pallor <u>and</u> SOB) .....</td><td><input type="checkbox"/></td> </tr> <tr> <td>4. Diabetes .....</td><td><input type="checkbox"/></td> </tr> <tr> <td>5. Severe headache .....</td><td><input type="checkbox"/></td> </tr> <tr> <td>6. Blurred vision.....</td><td><input type="checkbox"/></td> </tr> <tr> <td>7. Too weak to get out of bed.....</td><td><input type="checkbox"/></td> </tr> <tr> <td>8. Severe abdominal pain (not labor pain).</td><td><input type="checkbox"/></td> </tr> <tr> <td>9. Fast or difficult breathing .....</td><td><input type="checkbox"/></td> </tr> <tr> <td>10. Puffy face .....</td><td><input type="checkbox"/></td> </tr> <tr> <td>11. <u>Any</u> vaginal bleeding before labor .....</td><td><input type="checkbox"/></td> </tr> <tr> <td>12. Excessive bleeding during labor or dlvr.</td><td><input type="checkbox"/></td> </tr> <tr> <td>13. Fever .....</td><td><input type="checkbox"/></td> </tr> <tr> <td>14. Smelly vaginal discharge.....</td><td><input type="checkbox"/></td> </tr> <tr> <td>15. Early/preterm labor (less than 9 mths)</td><td><input type="checkbox"/></td> </tr> <tr> <td>16. Water broke 6 hrs or more before labor.</td><td><input type="checkbox"/></td> </tr> <tr> <td>17. Labor for 12 hours or more.....</td><td><input type="checkbox"/></td> </tr> <tr> <td>18. Other (specify).....</td><td><input type="checkbox"/></td> </tr> <tr> <td style="text-align: center;">( _____ )</td><td></td> </tr> <tr> <td>19. No symptoms during last 3 months .....</td><td><input type="checkbox"/></td> </tr> <tr> <td>20. No symptoms before labor .....</td><td><input type="checkbox"/></td> </tr> </table> <p style="text-align: right; margin-top: 10px;"><input type="checkbox"/> → <i>Inst_8</i></p> | 1. Convulsions..... | <input type="checkbox"/> | 2. High blood pressure .....      | <input type="checkbox"/>                                                                                                                    | 3. Severe anemia or (pallor <u>and</u> SOB) ..... | <input type="checkbox"/> | 4. Diabetes .....                   | <input type="checkbox"/> | 5. Severe headache .....                                                  | <input type="checkbox"/> | 6. Blurred vision.....                | <input type="checkbox"/> | 7. Too weak to get out of bed..... | <input type="checkbox"/> | 8. Severe abdominal pain (not labor pain). | <input type="checkbox"/> | 9. Fast or difficult breathing ..... | <input type="checkbox"/> | 10. Puffy face .....                                                                                                                                                                                                                                                                                                                                                                                                                                                                                                                                                                                                                                                                            | <input type="checkbox"/>    | 11. <u>Any</u> vaginal bleeding before labor ..... | <input type="checkbox"/>                   | 12. Excessive bleeding during labor or dlvr. | <input type="checkbox"/> | 13. Fever .....             | <input type="checkbox"/>    | 14. Smelly vaginal discharge..... | <input type="checkbox"/>           | 15. Early/preterm labor (less than 9 mths) | <input type="checkbox"/> | 16. Water broke 6 hrs or more before labor. | <input type="checkbox"/>             | 17. Labor for 12 hours or more..... | <input type="checkbox"/> | 18. Other (specify)..... | <input type="checkbox"/>            | ( _____ )                |  | 19. No symptoms during last 3 months ..... | <input type="checkbox"/> | 20. No symptoms before labor ..... | <input type="checkbox"/> | <p>Symptoms during last 3 months</p> <p>Yes</p> | <p>Started (related to labor/delivery)</p> <table style="width: 100%;"> <tr> <th>Before</th><th>W/D</th><th>DK</th> </tr> <tr> <td>1. <input type="checkbox"/></td><td>2. <input type="checkbox"/></td><td>9. <input type="checkbox"/></td> </tr> <tr> <td>1. <input type="checkbox"/></td><td>2. <input type="checkbox"/></td><td>9. <input type="checkbox"/></td> </tr> <tr> <td>1. <input type="checkbox"/></td><td>2. <input type="checkbox"/></td><td>9. <input type="checkbox"/></td> </tr> <tr> <td>1. <input type="checkbox"/></td><td>2. <input type="checkbox"/></td><td>9. <input type="checkbox"/></td> </tr> <tr> <td>1. <input type="checkbox"/></td><td>2. <input type="checkbox"/></td><td>9. <input type="checkbox"/></td> </tr> <tr> <td>1. <input type="checkbox"/></td><td>2. <input type="checkbox"/></td><td>9. <input type="checkbox"/></td> </tr> <tr> <td>1. <input type="checkbox"/></td><td>2. <input type="checkbox"/></td><td>9. <input type="checkbox"/></td> </tr> <tr> <td>1. <input type="checkbox"/></td><td>2. <input type="checkbox"/></td><td>9. <input type="checkbox"/></td> </tr> <tr> <td>1. <input type="checkbox"/></td><td>2. <input type="checkbox"/></td><td>9. <input type="checkbox"/></td> </tr> <tr> <td>1. <input type="checkbox"/></td><td>2. <input type="checkbox"/></td><td>9. <input type="checkbox"/></td> </tr> <tr> <td>1. <input type="checkbox"/></td><td>2. <input type="checkbox"/></td><td>9. <input type="checkbox"/></td> </tr> <tr> <td>1. <input type="checkbox"/></td><td>2. <input type="checkbox"/></td><td>9. <input type="checkbox"/></td> </tr> <tr> <td>1. <input type="checkbox"/></td><td>2. <input type="checkbox"/></td><td>9. <input type="checkbox"/></td> </tr> <tr> <td>1. <input type="checkbox"/></td><td>2. <input type="checkbox"/></td><td>9. <input type="checkbox"/></td> </tr> <tr> <td>1. <input type="checkbox"/></td><td>2. <input type="checkbox"/></td><td>9. <input type="checkbox"/></td> </tr> <tr> <td>1. <input type="checkbox"/></td><td>2. <input type="checkbox"/></td><td>9. <input type="checkbox"/></td> </tr> <tr> <td>1. <input type="checkbox"/></td><td>2. <input type="checkbox"/></td><td>9. <input type="checkbox"/></td> </tr> <tr> <td>1. <input type="checkbox"/></td><td>2. <input type="checkbox"/></td><td>9. <input type="checkbox"/></td> </tr> <tr> <td>1. <input type="checkbox"/></td><td>2. <input type="checkbox"/></td><td>9. <input type="checkbox"/></td> </tr> </table> <p style="text-align: right; margin-top: 10px;"><input type="checkbox"/> → <i>SQ4.11</i></p> | Before | W/D | DK | 1. <input type="checkbox"/> | 2. <input type="checkbox"/> | 9. <input type="checkbox"/> | 1. <input type="checkbox"/> | 2. <input type="checkbox"/> | 9. <input type="checkbox"/> | 1. <input type="checkbox"/> | 2. <input type="checkbox"/> | 9. <input type="checkbox"/> | 1. <input type="checkbox"/> | 2. <input type="checkbox"/> | 9. <input type="checkbox"/> | 1. <input type="checkbox"/> | 2. <input type="checkbox"/> | 9. <input type="checkbox"/> | 1. <input type="checkbox"/> | 2. <input type="checkbox"/> | 9. <input type="checkbox"/> | 1. <input type="checkbox"/> | 2. <input type="checkbox"/> | 9. <input type="checkbox"/> | 1. <input type="checkbox"/> | 2. <input type="checkbox"/> | 9. <input type="checkbox"/> | 1. <input type="checkbox"/> | 2. <input type="checkbox"/> | 9. <input type="checkbox"/> | 1. <input type="checkbox"/> | 2. <input type="checkbox"/> | 9. <input type="checkbox"/> | 1. <input type="checkbox"/> | 2. <input type="checkbox"/> | 9. <input type="checkbox"/> | 1. <input type="checkbox"/> | 2. <input type="checkbox"/> | 9. <input type="checkbox"/> | 1. <input type="checkbox"/> | 2. <input type="checkbox"/> | 9. <input type="checkbox"/> | 1. <input type="checkbox"/> | 2. <input type="checkbox"/> | 9. <input type="checkbox"/> | 1. <input type="checkbox"/> | 2. <input type="checkbox"/> | 9. <input type="checkbox"/> | 1. <input type="checkbox"/> | 2. <input type="checkbox"/> | 9. <input type="checkbox"/> | 1. <input type="checkbox"/> | 2. <input type="checkbox"/> | 9. <input type="checkbox"/> | 1. <input type="checkbox"/> | 2. <input type="checkbox"/> | 9. <input type="checkbox"/> | 1. <input type="checkbox"/> | 2. <input type="checkbox"/> | 9. <input type="checkbox"/> |
|---------------------------------------------------------------------------|--------------------------------------------------------------------------------------------------------------------------------------------------------------------------------------------------------------------------------------------------------------------------------------------------------------------------------------------------------------------------------------------------------------------------------------------------------------------------------------------------------------------------------------------------------------------------------------------------------------------------------------------------------------------------------------------------------------------------------------------------------------------------------------------------------------------------------------------------------------------------------------------------------------------------------------|------------------------------------------------------------------------------------------------------------------------------------------------------------------------------------------------------------------------------------------------------------------------------------------------------------------------------------------------------------------------------------------------------------------------------------------------------------------------------------------------------------------------------------------------------------------------------------------------------------------------------------------------------------------------------------------------------------------------------------------------------------------------------------------------------------------------------------------------------------------------------------------------------------------------------------------------------------------------------------------------------------------------------------------------------------------------------------------------------------------------------------------------------------------------------------------------------------------------------------------------------------------------------------------------------------------------------------------------------------------------------------------------------------------------------------------------------------------------------------------------------------------------------------------------------------------------------------------------------------------------------------------------------------------------------------------------------------------------------------------------------------------------------------------------------------------------------------------------------------------------------------------------------------------------------------------------------------------------------------------------------------|---------------------|--------------------------|-----------------------------------|---------------------------------------------------------------------------------------------------------------------------------------------|---------------------------------------------------|--------------------------|-------------------------------------|--------------------------|---------------------------------------------------------------------------|--------------------------|---------------------------------------|--------------------------|------------------------------------|--------------------------|--------------------------------------------|--------------------------|--------------------------------------|--------------------------|-------------------------------------------------------------------------------------------------------------------------------------------------------------------------------------------------------------------------------------------------------------------------------------------------------------------------------------------------------------------------------------------------------------------------------------------------------------------------------------------------------------------------------------------------------------------------------------------------------------------------------------------------------------------------------------------------|-----------------------------|----------------------------------------------------|--------------------------------------------|----------------------------------------------|--------------------------|-----------------------------|-----------------------------|-----------------------------------|------------------------------------|--------------------------------------------|--------------------------|---------------------------------------------|--------------------------------------|-------------------------------------|--------------------------|--------------------------|-------------------------------------|--------------------------|--|--------------------------------------------|--------------------------|------------------------------------|--------------------------|-------------------------------------------------|---------------------------------------------------------------------------------------------------------------------------------------------------------------------------------------------------------------------------------------------------------------------------------------------------------------------------------------------------------------------------------------------------------------------------------------------------------------------------------------------------------------------------------------------------------------------------------------------------------------------------------------------------------------------------------------------------------------------------------------------------------------------------------------------------------------------------------------------------------------------------------------------------------------------------------------------------------------------------------------------------------------------------------------------------------------------------------------------------------------------------------------------------------------------------------------------------------------------------------------------------------------------------------------------------------------------------------------------------------------------------------------------------------------------------------------------------------------------------------------------------------------------------------------------------------------------------------------------------------------------------------------------------------------------------------------------------------------------------------------------------------------------------------------------------------------------------------------------------------------------------------------------------------------------------------------------------------------------------------------------------------------------------------------------------------------------------------------------------------------------------------------------------------------------------------------------------------------------------------------------------------------------------------------------------------------------------------------------------------------------------------------------------------------------------------------------------------------------------------------------------------------------------------------------------------------------------------------------------------|--------|-----|----|-----------------------------|-----------------------------|-----------------------------|-----------------------------|-----------------------------|-----------------------------|-----------------------------|-----------------------------|-----------------------------|-----------------------------|-----------------------------|-----------------------------|-----------------------------|-----------------------------|-----------------------------|-----------------------------|-----------------------------|-----------------------------|-----------------------------|-----------------------------|-----------------------------|-----------------------------|-----------------------------|-----------------------------|-----------------------------|-----------------------------|-----------------------------|-----------------------------|-----------------------------|-----------------------------|-----------------------------|-----------------------------|-----------------------------|-----------------------------|-----------------------------|-----------------------------|-----------------------------|-----------------------------|-----------------------------|-----------------------------|-----------------------------|-----------------------------|-----------------------------|-----------------------------|-----------------------------|-----------------------------|-----------------------------|-----------------------------|-----------------------------|-----------------------------|-----------------------------|-----------------------------|-----------------------------|-----------------------------|-----------------------------|-----------------------------|-----------------------------|
| 1. Convulsions.....                                                       | <input type="checkbox"/>                                                                                                                                                                                                                                                                                                                                                                                                                                                                                                                                                                                                                                                                                                                                                                                                                                                                                                             |                                                                                                                                                                                                                                                                                                                                                                                                                                                                                                                                                                                                                                                                                                                                                                                                                                                                                                                                                                                                                                                                                                                                                                                                                                                                                                                                                                                                                                                                                                                                                                                                                                                                                                                                                                                                                                                                                                                                                                                                            |                     |                          |                                   |                                                                                                                                             |                                                   |                          |                                     |                          |                                                                           |                          |                                       |                          |                                    |                          |                                            |                          |                                      |                          |                                                                                                                                                                                                                                                                                                                                                                                                                                                                                                                                                                                                                                                                                                 |                             |                                                    |                                            |                                              |                          |                             |                             |                                   |                                    |                                            |                          |                                             |                                      |                                     |                          |                          |                                     |                          |  |                                            |                          |                                    |                          |                                                 |                                                                                                                                                                                                                                                                                                                                                                                                                                                                                                                                                                                                                                                                                                                                                                                                                                                                                                                                                                                                                                                                                                                                                                                                                                                                                                                                                                                                                                                                                                                                                                                                                                                                                                                                                                                                                                                                                                                                                                                                                                                                                                                                                                                                                                                                                                                                                                                                                                                                                                                                                                                                         |        |     |    |                             |                             |                             |                             |                             |                             |                             |                             |                             |                             |                             |                             |                             |                             |                             |                             |                             |                             |                             |                             |                             |                             |                             |                             |                             |                             |                             |                             |                             |                             |                             |                             |                             |                             |                             |                             |                             |                             |                             |                             |                             |                             |                             |                             |                             |                             |                             |                             |                             |                             |                             |                             |                             |                             |                             |                             |                             |
| 2. High blood pressure .....                                              | <input type="checkbox"/>                                                                                                                                                                                                                                                                                                                                                                                                                                                                                                                                                                                                                                                                                                                                                                                                                                                                                                             |                                                                                                                                                                                                                                                                                                                                                                                                                                                                                                                                                                                                                                                                                                                                                                                                                                                                                                                                                                                                                                                                                                                                                                                                                                                                                                                                                                                                                                                                                                                                                                                                                                                                                                                                                                                                                                                                                                                                                                                                            |                     |                          |                                   |                                                                                                                                             |                                                   |                          |                                     |                          |                                                                           |                          |                                       |                          |                                    |                          |                                            |                          |                                      |                          |                                                                                                                                                                                                                                                                                                                                                                                                                                                                                                                                                                                                                                                                                                 |                             |                                                    |                                            |                                              |                          |                             |                             |                                   |                                    |                                            |                          |                                             |                                      |                                     |                          |                          |                                     |                          |  |                                            |                          |                                    |                          |                                                 |                                                                                                                                                                                                                                                                                                                                                                                                                                                                                                                                                                                                                                                                                                                                                                                                                                                                                                                                                                                                                                                                                                                                                                                                                                                                                                                                                                                                                                                                                                                                                                                                                                                                                                                                                                                                                                                                                                                                                                                                                                                                                                                                                                                                                                                                                                                                                                                                                                                                                                                                                                                                         |        |     |    |                             |                             |                             |                             |                             |                             |                             |                             |                             |                             |                             |                             |                             |                             |                             |                             |                             |                             |                             |                             |                             |                             |                             |                             |                             |                             |                             |                             |                             |                             |                             |                             |                             |                             |                             |                             |                             |                             |                             |                             |                             |                             |                             |                             |                             |                             |                             |                             |                             |                             |                             |                             |                             |                             |                             |                             |                             |
| 3. Severe anemia or (pallor <u>and</u> SOB) .....                         | <input type="checkbox"/>                                                                                                                                                                                                                                                                                                                                                                                                                                                                                                                                                                                                                                                                                                                                                                                                                                                                                                             |                                                                                                                                                                                                                                                                                                                                                                                                                                                                                                                                                                                                                                                                                                                                                                                                                                                                                                                                                                                                                                                                                                                                                                                                                                                                                                                                                                                                                                                                                                                                                                                                                                                                                                                                                                                                                                                                                                                                                                                                            |                     |                          |                                   |                                                                                                                                             |                                                   |                          |                                     |                          |                                                                           |                          |                                       |                          |                                    |                          |                                            |                          |                                      |                          |                                                                                                                                                                                                                                                                                                                                                                                                                                                                                                                                                                                                                                                                                                 |                             |                                                    |                                            |                                              |                          |                             |                             |                                   |                                    |                                            |                          |                                             |                                      |                                     |                          |                          |                                     |                          |  |                                            |                          |                                    |                          |                                                 |                                                                                                                                                                                                                                                                                                                                                                                                                                                                                                                                                                                                                                                                                                                                                                                                                                                                                                                                                                                                                                                                                                                                                                                                                                                                                                                                                                                                                                                                                                                                                                                                                                                                                                                                                                                                                                                                                                                                                                                                                                                                                                                                                                                                                                                                                                                                                                                                                                                                                                                                                                                                         |        |     |    |                             |                             |                             |                             |                             |                             |                             |                             |                             |                             |                             |                             |                             |                             |                             |                             |                             |                             |                             |                             |                             |                             |                             |                             |                             |                             |                             |                             |                             |                             |                             |                             |                             |                             |                             |                             |                             |                             |                             |                             |                             |                             |                             |                             |                             |                             |                             |                             |                             |                             |                             |                             |                             |                             |                             |                             |                             |
| 4. Diabetes .....                                                         | <input type="checkbox"/>                                                                                                                                                                                                                                                                                                                                                                                                                                                                                                                                                                                                                                                                                                                                                                                                                                                                                                             |                                                                                                                                                                                                                                                                                                                                                                                                                                                                                                                                                                                                                                                                                                                                                                                                                                                                                                                                                                                                                                                                                                                                                                                                                                                                                                                                                                                                                                                                                                                                                                                                                                                                                                                                                                                                                                                                                                                                                                                                            |                     |                          |                                   |                                                                                                                                             |                                                   |                          |                                     |                          |                                                                           |                          |                                       |                          |                                    |                          |                                            |                          |                                      |                          |                                                                                                                                                                                                                                                                                                                                                                                                                                                                                                                                                                                                                                                                                                 |                             |                                                    |                                            |                                              |                          |                             |                             |                                   |                                    |                                            |                          |                                             |                                      |                                     |                          |                          |                                     |                          |  |                                            |                          |                                    |                          |                                                 |                                                                                                                                                                                                                                                                                                                                                                                                                                                                                                                                                                                                                                                                                                                                                                                                                                                                                                                                                                                                                                                                                                                                                                                                                                                                                                                                                                                                                                                                                                                                                                                                                                                                                                                                                                                                                                                                                                                                                                                                                                                                                                                                                                                                                                                                                                                                                                                                                                                                                                                                                                                                         |        |     |    |                             |                             |                             |                             |                             |                             |                             |                             |                             |                             |                             |                             |                             |                             |                             |                             |                             |                             |                             |                             |                             |                             |                             |                             |                             |                             |                             |                             |                             |                             |                             |                             |                             |                             |                             |                             |                             |                             |                             |                             |                             |                             |                             |                             |                             |                             |                             |                             |                             |                             |                             |                             |                             |                             |                             |                             |                             |
| 5. Severe headache .....                                                  | <input type="checkbox"/>                                                                                                                                                                                                                                                                                                                                                                                                                                                                                                                                                                                                                                                                                                                                                                                                                                                                                                             |                                                                                                                                                                                                                                                                                                                                                                                                                                                                                                                                                                                                                                                                                                                                                                                                                                                                                                                                                                                                                                                                                                                                                                                                                                                                                                                                                                                                                                                                                                                                                                                                                                                                                                                                                                                                                                                                                                                                                                                                            |                     |                          |                                   |                                                                                                                                             |                                                   |                          |                                     |                          |                                                                           |                          |                                       |                          |                                    |                          |                                            |                          |                                      |                          |                                                                                                                                                                                                                                                                                                                                                                                                                                                                                                                                                                                                                                                                                                 |                             |                                                    |                                            |                                              |                          |                             |                             |                                   |                                    |                                            |                          |                                             |                                      |                                     |                          |                          |                                     |                          |  |                                            |                          |                                    |                          |                                                 |                                                                                                                                                                                                                                                                                                                                                                                                                                                                                                                                                                                                                                                                                                                                                                                                                                                                                                                                                                                                                                                                                                                                                                                                                                                                                                                                                                                                                                                                                                                                                                                                                                                                                                                                                                                                                                                                                                                                                                                                                                                                                                                                                                                                                                                                                                                                                                                                                                                                                                                                                                                                         |        |     |    |                             |                             |                             |                             |                             |                             |                             |                             |                             |                             |                             |                             |                             |                             |                             |                             |                             |                             |                             |                             |                             |                             |                             |                             |                             |                             |                             |                             |                             |                             |                             |                             |                             |                             |                             |                             |                             |                             |                             |                             |                             |                             |                             |                             |                             |                             |                             |                             |                             |                             |                             |                             |                             |                             |                             |                             |                             |
| 6. Blurred vision.....                                                    | <input type="checkbox"/>                                                                                                                                                                                                                                                                                                                                                                                                                                                                                                                                                                                                                                                                                                                                                                                                                                                                                                             |                                                                                                                                                                                                                                                                                                                                                                                                                                                                                                                                                                                                                                                                                                                                                                                                                                                                                                                                                                                                                                                                                                                                                                                                                                                                                                                                                                                                                                                                                                                                                                                                                                                                                                                                                                                                                                                                                                                                                                                                            |                     |                          |                                   |                                                                                                                                             |                                                   |                          |                                     |                          |                                                                           |                          |                                       |                          |                                    |                          |                                            |                          |                                      |                          |                                                                                                                                                                                                                                                                                                                                                                                                                                                                                                                                                                                                                                                                                                 |                             |                                                    |                                            |                                              |                          |                             |                             |                                   |                                    |                                            |                          |                                             |                                      |                                     |                          |                          |                                     |                          |  |                                            |                          |                                    |                          |                                                 |                                                                                                                                                                                                                                                                                                                                                                                                                                                                                                                                                                                                                                                                                                                                                                                                                                                                                                                                                                                                                                                                                                                                                                                                                                                                                                                                                                                                                                                                                                                                                                                                                                                                                                                                                                                                                                                                                                                                                                                                                                                                                                                                                                                                                                                                                                                                                                                                                                                                                                                                                                                                         |        |     |    |                             |                             |                             |                             |                             |                             |                             |                             |                             |                             |                             |                             |                             |                             |                             |                             |                             |                             |                             |                             |                             |                             |                             |                             |                             |                             |                             |                             |                             |                             |                             |                             |                             |                             |                             |                             |                             |                             |                             |                             |                             |                             |                             |                             |                             |                             |                             |                             |                             |                             |                             |                             |                             |                             |                             |                             |                             |
| 7. Too weak to get out of bed.....                                        | <input type="checkbox"/>                                                                                                                                                                                                                                                                                                                                                                                                                                                                                                                                                                                                                                                                                                                                                                                                                                                                                                             |                                                                                                                                                                                                                                                                                                                                                                                                                                                                                                                                                                                                                                                                                                                                                                                                                                                                                                                                                                                                                                                                                                                                                                                                                                                                                                                                                                                                                                                                                                                                                                                                                                                                                                                                                                                                                                                                                                                                                                                                            |                     |                          |                                   |                                                                                                                                             |                                                   |                          |                                     |                          |                                                                           |                          |                                       |                          |                                    |                          |                                            |                          |                                      |                          |                                                                                                                                                                                                                                                                                                                                                                                                                                                                                                                                                                                                                                                                                                 |                             |                                                    |                                            |                                              |                          |                             |                             |                                   |                                    |                                            |                          |                                             |                                      |                                     |                          |                          |                                     |                          |  |                                            |                          |                                    |                          |                                                 |                                                                                                                                                                                                                                                                                                                                                                                                                                                                                                                                                                                                                                                                                                                                                                                                                                                                                                                                                                                                                                                                                                                                                                                                                                                                                                                                                                                                                                                                                                                                                                                                                                                                                                                                                                                                                                                                                                                                                                                                                                                                                                                                                                                                                                                                                                                                                                                                                                                                                                                                                                                                         |        |     |    |                             |                             |                             |                             |                             |                             |                             |                             |                             |                             |                             |                             |                             |                             |                             |                             |                             |                             |                             |                             |                             |                             |                             |                             |                             |                             |                             |                             |                             |                             |                             |                             |                             |                             |                             |                             |                             |                             |                             |                             |                             |                             |                             |                             |                             |                             |                             |                             |                             |                             |                             |                             |                             |                             |                             |                             |                             |
| 8. Severe abdominal pain (not labor pain).                                | <input type="checkbox"/>                                                                                                                                                                                                                                                                                                                                                                                                                                                                                                                                                                                                                                                                                                                                                                                                                                                                                                             |                                                                                                                                                                                                                                                                                                                                                                                                                                                                                                                                                                                                                                                                                                                                                                                                                                                                                                                                                                                                                                                                                                                                                                                                                                                                                                                                                                                                                                                                                                                                                                                                                                                                                                                                                                                                                                                                                                                                                                                                            |                     |                          |                                   |                                                                                                                                             |                                                   |                          |                                     |                          |                                                                           |                          |                                       |                          |                                    |                          |                                            |                          |                                      |                          |                                                                                                                                                                                                                                                                                                                                                                                                                                                                                                                                                                                                                                                                                                 |                             |                                                    |                                            |                                              |                          |                             |                             |                                   |                                    |                                            |                          |                                             |                                      |                                     |                          |                          |                                     |                          |  |                                            |                          |                                    |                          |                                                 |                                                                                                                                                                                                                                                                                                                                                                                                                                                                                                                                                                                                                                                                                                                                                                                                                                                                                                                                                                                                                                                                                                                                                                                                                                                                                                                                                                                                                                                                                                                                                                                                                                                                                                                                                                                                                                                                                                                                                                                                                                                                                                                                                                                                                                                                                                                                                                                                                                                                                                                                                                                                         |        |     |    |                             |                             |                             |                             |                             |                             |                             |                             |                             |                             |                             |                             |                             |                             |                             |                             |                             |                             |                             |                             |                             |                             |                             |                             |                             |                             |                             |                             |                             |                             |                             |                             |                             |                             |                             |                             |                             |                             |                             |                             |                             |                             |                             |                             |                             |                             |                             |                             |                             |                             |                             |                             |                             |                             |                             |                             |                             |
| 9. Fast or difficult breathing .....                                      | <input type="checkbox"/>                                                                                                                                                                                                                                                                                                                                                                                                                                                                                                                                                                                                                                                                                                                                                                                                                                                                                                             |                                                                                                                                                                                                                                                                                                                                                                                                                                                                                                                                                                                                                                                                                                                                                                                                                                                                                                                                                                                                                                                                                                                                                                                                                                                                                                                                                                                                                                                                                                                                                                                                                                                                                                                                                                                                                                                                                                                                                                                                            |                     |                          |                                   |                                                                                                                                             |                                                   |                          |                                     |                          |                                                                           |                          |                                       |                          |                                    |                          |                                            |                          |                                      |                          |                                                                                                                                                                                                                                                                                                                                                                                                                                                                                                                                                                                                                                                                                                 |                             |                                                    |                                            |                                              |                          |                             |                             |                                   |                                    |                                            |                          |                                             |                                      |                                     |                          |                          |                                     |                          |  |                                            |                          |                                    |                          |                                                 |                                                                                                                                                                                                                                                                                                                                                                                                                                                                                                                                                                                                                                                                                                                                                                                                                                                                                                                                                                                                                                                                                                                                                                                                                                                                                                                                                                                                                                                                                                                                                                                                                                                                                                                                                                                                                                                                                                                                                                                                                                                                                                                                                                                                                                                                                                                                                                                                                                                                                                                                                                                                         |        |     |    |                             |                             |                             |                             |                             |                             |                             |                             |                             |                             |                             |                             |                             |                             |                             |                             |                             |                             |                             |                             |                             |                             |                             |                             |                             |                             |                             |                             |                             |                             |                             |                             |                             |                             |                             |                             |                             |                             |                             |                             |                             |                             |                             |                             |                             |                             |                             |                             |                             |                             |                             |                             |                             |                             |                             |                             |                             |
| 10. Puffy face .....                                                      | <input type="checkbox"/>                                                                                                                                                                                                                                                                                                                                                                                                                                                                                                                                                                                                                                                                                                                                                                                                                                                                                                             |                                                                                                                                                                                                                                                                                                                                                                                                                                                                                                                                                                                                                                                                                                                                                                                                                                                                                                                                                                                                                                                                                                                                                                                                                                                                                                                                                                                                                                                                                                                                                                                                                                                                                                                                                                                                                                                                                                                                                                                                            |                     |                          |                                   |                                                                                                                                             |                                                   |                          |                                     |                          |                                                                           |                          |                                       |                          |                                    |                          |                                            |                          |                                      |                          |                                                                                                                                                                                                                                                                                                                                                                                                                                                                                                                                                                                                                                                                                                 |                             |                                                    |                                            |                                              |                          |                             |                             |                                   |                                    |                                            |                          |                                             |                                      |                                     |                          |                          |                                     |                          |  |                                            |                          |                                    |                          |                                                 |                                                                                                                                                                                                                                                                                                                                                                                                                                                                                                                                                                                                                                                                                                                                                                                                                                                                                                                                                                                                                                                                                                                                                                                                                                                                                                                                                                                                                                                                                                                                                                                                                                                                                                                                                                                                                                                                                                                                                                                                                                                                                                                                                                                                                                                                                                                                                                                                                                                                                                                                                                                                         |        |     |    |                             |                             |                             |                             |                             |                             |                             |                             |                             |                             |                             |                             |                             |                             |                             |                             |                             |                             |                             |                             |                             |                             |                             |                             |                             |                             |                             |                             |                             |                             |                             |                             |                             |                             |                             |                             |                             |                             |                             |                             |                             |                             |                             |                             |                             |                             |                             |                             |                             |                             |                             |                             |                             |                             |                             |                             |                             |
| 11. <u>Any</u> vaginal bleeding before labor .....                        | <input type="checkbox"/>                                                                                                                                                                                                                                                                                                                                                                                                                                                                                                                                                                                                                                                                                                                                                                                                                                                                                                             |                                                                                                                                                                                                                                                                                                                                                                                                                                                                                                                                                                                                                                                                                                                                                                                                                                                                                                                                                                                                                                                                                                                                                                                                                                                                                                                                                                                                                                                                                                                                                                                                                                                                                                                                                                                                                                                                                                                                                                                                            |                     |                          |                                   |                                                                                                                                             |                                                   |                          |                                     |                          |                                                                           |                          |                                       |                          |                                    |                          |                                            |                          |                                      |                          |                                                                                                                                                                                                                                                                                                                                                                                                                                                                                                                                                                                                                                                                                                 |                             |                                                    |                                            |                                              |                          |                             |                             |                                   |                                    |                                            |                          |                                             |                                      |                                     |                          |                          |                                     |                          |  |                                            |                          |                                    |                          |                                                 |                                                                                                                                                                                                                                                                                                                                                                                                                                                                                                                                                                                                                                                                                                                                                                                                                                                                                                                                                                                                                                                                                                                                                                                                                                                                                                                                                                                                                                                                                                                                                                                                                                                                                                                                                                                                                                                                                                                                                                                                                                                                                                                                                                                                                                                                                                                                                                                                                                                                                                                                                                                                         |        |     |    |                             |                             |                             |                             |                             |                             |                             |                             |                             |                             |                             |                             |                             |                             |                             |                             |                             |                             |                             |                             |                             |                             |                             |                             |                             |                             |                             |                             |                             |                             |                             |                             |                             |                             |                             |                             |                             |                             |                             |                             |                             |                             |                             |                             |                             |                             |                             |                             |                             |                             |                             |                             |                             |                             |                             |                             |                             |
| 12. Excessive bleeding during labor or dlvr.                              | <input type="checkbox"/>                                                                                                                                                                                                                                                                                                                                                                                                                                                                                                                                                                                                                                                                                                                                                                                                                                                                                                             |                                                                                                                                                                                                                                                                                                                                                                                                                                                                                                                                                                                                                                                                                                                                                                                                                                                                                                                                                                                                                                                                                                                                                                                                                                                                                                                                                                                                                                                                                                                                                                                                                                                                                                                                                                                                                                                                                                                                                                                                            |                     |                          |                                   |                                                                                                                                             |                                                   |                          |                                     |                          |                                                                           |                          |                                       |                          |                                    |                          |                                            |                          |                                      |                          |                                                                                                                                                                                                                                                                                                                                                                                                                                                                                                                                                                                                                                                                                                 |                             |                                                    |                                            |                                              |                          |                             |                             |                                   |                                    |                                            |                          |                                             |                                      |                                     |                          |                          |                                     |                          |  |                                            |                          |                                    |                          |                                                 |                                                                                                                                                                                                                                                                                                                                                                                                                                                                                                                                                                                                                                                                                                                                                                                                                                                                                                                                                                                                                                                                                                                                                                                                                                                                                                                                                                                                                                                                                                                                                                                                                                                                                                                                                                                                                                                                                                                                                                                                                                                                                                                                                                                                                                                                                                                                                                                                                                                                                                                                                                                                         |        |     |    |                             |                             |                             |                             |                             |                             |                             |                             |                             |                             |                             |                             |                             |                             |                             |                             |                             |                             |                             |                             |                             |                             |                             |                             |                             |                             |                             |                             |                             |                             |                             |                             |                             |                             |                             |                             |                             |                             |                             |                             |                             |                             |                             |                             |                             |                             |                             |                             |                             |                             |                             |                             |                             |                             |                             |                             |                             |
| 13. Fever .....                                                           | <input type="checkbox"/>                                                                                                                                                                                                                                                                                                                                                                                                                                                                                                                                                                                                                                                                                                                                                                                                                                                                                                             |                                                                                                                                                                                                                                                                                                                                                                                                                                                                                                                                                                                                                                                                                                                                                                                                                                                                                                                                                                                                                                                                                                                                                                                                                                                                                                                                                                                                                                                                                                                                                                                                                                                                                                                                                                                                                                                                                                                                                                                                            |                     |                          |                                   |                                                                                                                                             |                                                   |                          |                                     |                          |                                                                           |                          |                                       |                          |                                    |                          |                                            |                          |                                      |                          |                                                                                                                                                                                                                                                                                                                                                                                                                                                                                                                                                                                                                                                                                                 |                             |                                                    |                                            |                                              |                          |                             |                             |                                   |                                    |                                            |                          |                                             |                                      |                                     |                          |                          |                                     |                          |  |                                            |                          |                                    |                          |                                                 |                                                                                                                                                                                                                                                                                                                                                                                                                                                                                                                                                                                                                                                                                                                                                                                                                                                                                                                                                                                                                                                                                                                                                                                                                                                                                                                                                                                                                                                                                                                                                                                                                                                                                                                                                                                                                                                                                                                                                                                                                                                                                                                                                                                                                                                                                                                                                                                                                                                                                                                                                                                                         |        |     |    |                             |                             |                             |                             |                             |                             |                             |                             |                             |                             |                             |                             |                             |                             |                             |                             |                             |                             |                             |                             |                             |                             |                             |                             |                             |                             |                             |                             |                             |                             |                             |                             |                             |                             |                             |                             |                             |                             |                             |                             |                             |                             |                             |                             |                             |                             |                             |                             |                             |                             |                             |                             |                             |                             |                             |                             |                             |
| 14. Smelly vaginal discharge.....                                         | <input type="checkbox"/>                                                                                                                                                                                                                                                                                                                                                                                                                                                                                                                                                                                                                                                                                                                                                                                                                                                                                                             |                                                                                                                                                                                                                                                                                                                                                                                                                                                                                                                                                                                                                                                                                                                                                                                                                                                                                                                                                                                                                                                                                                                                                                                                                                                                                                                                                                                                                                                                                                                                                                                                                                                                                                                                                                                                                                                                                                                                                                                                            |                     |                          |                                   |                                                                                                                                             |                                                   |                          |                                     |                          |                                                                           |                          |                                       |                          |                                    |                          |                                            |                          |                                      |                          |                                                                                                                                                                                                                                                                                                                                                                                                                                                                                                                                                                                                                                                                                                 |                             |                                                    |                                            |                                              |                          |                             |                             |                                   |                                    |                                            |                          |                                             |                                      |                                     |                          |                          |                                     |                          |  |                                            |                          |                                    |                          |                                                 |                                                                                                                                                                                                                                                                                                                                                                                                                                                                                                                                                                                                                                                                                                                                                                                                                                                                                                                                                                                                                                                                                                                                                                                                                                                                                                                                                                                                                                                                                                                                                                                                                                                                                                                                                                                                                                                                                                                                                                                                                                                                                                                                                                                                                                                                                                                                                                                                                                                                                                                                                                                                         |        |     |    |                             |                             |                             |                             |                             |                             |                             |                             |                             |                             |                             |                             |                             |                             |                             |                             |                             |                             |                             |                             |                             |                             |                             |                             |                             |                             |                             |                             |                             |                             |                             |                             |                             |                             |                             |                             |                             |                             |                             |                             |                             |                             |                             |                             |                             |                             |                             |                             |                             |                             |                             |                             |                             |                             |                             |                             |                             |
| 15. Early/preterm labor (less than 9 mths)                                | <input type="checkbox"/>                                                                                                                                                                                                                                                                                                                                                                                                                                                                                                                                                                                                                                                                                                                                                                                                                                                                                                             |                                                                                                                                                                                                                                                                                                                                                                                                                                                                                                                                                                                                                                                                                                                                                                                                                                                                                                                                                                                                                                                                                                                                                                                                                                                                                                                                                                                                                                                                                                                                                                                                                                                                                                                                                                                                                                                                                                                                                                                                            |                     |                          |                                   |                                                                                                                                             |                                                   |                          |                                     |                          |                                                                           |                          |                                       |                          |                                    |                          |                                            |                          |                                      |                          |                                                                                                                                                                                                                                                                                                                                                                                                                                                                                                                                                                                                                                                                                                 |                             |                                                    |                                            |                                              |                          |                             |                             |                                   |                                    |                                            |                          |                                             |                                      |                                     |                          |                          |                                     |                          |  |                                            |                          |                                    |                          |                                                 |                                                                                                                                                                                                                                                                                                                                                                                                                                                                                                                                                                                                                                                                                                                                                                                                                                                                                                                                                                                                                                                                                                                                                                                                                                                                                                                                                                                                                                                                                                                                                                                                                                                                                                                                                                                                                                                                                                                                                                                                                                                                                                                                                                                                                                                                                                                                                                                                                                                                                                                                                                                                         |        |     |    |                             |                             |                             |                             |                             |                             |                             |                             |                             |                             |                             |                             |                             |                             |                             |                             |                             |                             |                             |                             |                             |                             |                             |                             |                             |                             |                             |                             |                             |                             |                             |                             |                             |                             |                             |                             |                             |                             |                             |                             |                             |                             |                             |                             |                             |                             |                             |                             |                             |                             |                             |                             |                             |                             |                             |                             |                             |
| 16. Water broke 6 hrs or more before labor.                               | <input type="checkbox"/>                                                                                                                                                                                                                                                                                                                                                                                                                                                                                                                                                                                                                                                                                                                                                                                                                                                                                                             |                                                                                                                                                                                                                                                                                                                                                                                                                                                                                                                                                                                                                                                                                                                                                                                                                                                                                                                                                                                                                                                                                                                                                                                                                                                                                                                                                                                                                                                                                                                                                                                                                                                                                                                                                                                                                                                                                                                                                                                                            |                     |                          |                                   |                                                                                                                                             |                                                   |                          |                                     |                          |                                                                           |                          |                                       |                          |                                    |                          |                                            |                          |                                      |                          |                                                                                                                                                                                                                                                                                                                                                                                                                                                                                                                                                                                                                                                                                                 |                             |                                                    |                                            |                                              |                          |                             |                             |                                   |                                    |                                            |                          |                                             |                                      |                                     |                          |                          |                                     |                          |  |                                            |                          |                                    |                          |                                                 |                                                                                                                                                                                                                                                                                                                                                                                                                                                                                                                                                                                                                                                                                                                                                                                                                                                                                                                                                                                                                                                                                                                                                                                                                                                                                                                                                                                                                                                                                                                                                                                                                                                                                                                                                                                                                                                                                                                                                                                                                                                                                                                                                                                                                                                                                                                                                                                                                                                                                                                                                                                                         |        |     |    |                             |                             |                             |                             |                             |                             |                             |                             |                             |                             |                             |                             |                             |                             |                             |                             |                             |                             |                             |                             |                             |                             |                             |                             |                             |                             |                             |                             |                             |                             |                             |                             |                             |                             |                             |                             |                             |                             |                             |                             |                             |                             |                             |                             |                             |                             |                             |                             |                             |                             |                             |                             |                             |                             |                             |                             |                             |
| 17. Labor for 12 hours or more.....                                       | <input type="checkbox"/>                                                                                                                                                                                                                                                                                                                                                                                                                                                                                                                                                                                                                                                                                                                                                                                                                                                                                                             |                                                                                                                                                                                                                                                                                                                                                                                                                                                                                                                                                                                                                                                                                                                                                                                                                                                                                                                                                                                                                                                                                                                                                                                                                                                                                                                                                                                                                                                                                                                                                                                                                                                                                                                                                                                                                                                                                                                                                                                                            |                     |                          |                                   |                                                                                                                                             |                                                   |                          |                                     |                          |                                                                           |                          |                                       |                          |                                    |                          |                                            |                          |                                      |                          |                                                                                                                                                                                                                                                                                                                                                                                                                                                                                                                                                                                                                                                                                                 |                             |                                                    |                                            |                                              |                          |                             |                             |                                   |                                    |                                            |                          |                                             |                                      |                                     |                          |                          |                                     |                          |  |                                            |                          |                                    |                          |                                                 |                                                                                                                                                                                                                                                                                                                                                                                                                                                                                                                                                                                                                                                                                                                                                                                                                                                                                                                                                                                                                                                                                                                                                                                                                                                                                                                                                                                                                                                                                                                                                                                                                                                                                                                                                                                                                                                                                                                                                                                                                                                                                                                                                                                                                                                                                                                                                                                                                                                                                                                                                                                                         |        |     |    |                             |                             |                             |                             |                             |                             |                             |                             |                             |                             |                             |                             |                             |                             |                             |                             |                             |                             |                             |                             |                             |                             |                             |                             |                             |                             |                             |                             |                             |                             |                             |                             |                             |                             |                             |                             |                             |                             |                             |                             |                             |                             |                             |                             |                             |                             |                             |                             |                             |                             |                             |                             |                             |                             |                             |                             |                             |
| 18. Other (specify).....                                                  | <input type="checkbox"/>                                                                                                                                                                                                                                                                                                                                                                                                                                                                                                                                                                                                                                                                                                                                                                                                                                                                                                             |                                                                                                                                                                                                                                                                                                                                                                                                                                                                                                                                                                                                                                                                                                                                                                                                                                                                                                                                                                                                                                                                                                                                                                                                                                                                                                                                                                                                                                                                                                                                                                                                                                                                                                                                                                                                                                                                                                                                                                                                            |                     |                          |                                   |                                                                                                                                             |                                                   |                          |                                     |                          |                                                                           |                          |                                       |                          |                                    |                          |                                            |                          |                                      |                          |                                                                                                                                                                                                                                                                                                                                                                                                                                                                                                                                                                                                                                                                                                 |                             |                                                    |                                            |                                              |                          |                             |                             |                                   |                                    |                                            |                          |                                             |                                      |                                     |                          |                          |                                     |                          |  |                                            |                          |                                    |                          |                                                 |                                                                                                                                                                                                                                                                                                                                                                                                                                                                                                                                                                                                                                                                                                                                                                                                                                                                                                                                                                                                                                                                                                                                                                                                                                                                                                                                                                                                                                                                                                                                                                                                                                                                                                                                                                                                                                                                                                                                                                                                                                                                                                                                                                                                                                                                                                                                                                                                                                                                                                                                                                                                         |        |     |    |                             |                             |                             |                             |                             |                             |                             |                             |                             |                             |                             |                             |                             |                             |                             |                             |                             |                             |                             |                             |                             |                             |                             |                             |                             |                             |                             |                             |                             |                             |                             |                             |                             |                             |                             |                             |                             |                             |                             |                             |                             |                             |                             |                             |                             |                             |                             |                             |                             |                             |                             |                             |                             |                             |                             |                             |                             |
| ( _____ )                                                                 |                                                                                                                                                                                                                                                                                                                                                                                                                                                                                                                                                                                                                                                                                                                                                                                                                                                                                                                                      |                                                                                                                                                                                                                                                                                                                                                                                                                                                                                                                                                                                                                                                                                                                                                                                                                                                                                                                                                                                                                                                                                                                                                                                                                                                                                                                                                                                                                                                                                                                                                                                                                                                                                                                                                                                                                                                                                                                                                                                                            |                     |                          |                                   |                                                                                                                                             |                                                   |                          |                                     |                          |                                                                           |                          |                                       |                          |                                    |                          |                                            |                          |                                      |                          |                                                                                                                                                                                                                                                                                                                                                                                                                                                                                                                                                                                                                                                                                                 |                             |                                                    |                                            |                                              |                          |                             |                             |                                   |                                    |                                            |                          |                                             |                                      |                                     |                          |                          |                                     |                          |  |                                            |                          |                                    |                          |                                                 |                                                                                                                                                                                                                                                                                                                                                                                                                                                                                                                                                                                                                                                                                                                                                                                                                                                                                                                                                                                                                                                                                                                                                                                                                                                                                                                                                                                                                                                                                                                                                                                                                                                                                                                                                                                                                                                                                                                                                                                                                                                                                                                                                                                                                                                                                                                                                                                                                                                                                                                                                                                                         |        |     |    |                             |                             |                             |                             |                             |                             |                             |                             |                             |                             |                             |                             |                             |                             |                             |                             |                             |                             |                             |                             |                             |                             |                             |                             |                             |                             |                             |                             |                             |                             |                             |                             |                             |                             |                             |                             |                             |                             |                             |                             |                             |                             |                             |                             |                             |                             |                             |                             |                             |                             |                             |                             |                             |                             |                             |                             |                             |
| 19. No symptoms during last 3 months .....                                | <input type="checkbox"/>                                                                                                                                                                                                                                                                                                                                                                                                                                                                                                                                                                                                                                                                                                                                                                                                                                                                                                             |                                                                                                                                                                                                                                                                                                                                                                                                                                                                                                                                                                                                                                                                                                                                                                                                                                                                                                                                                                                                                                                                                                                                                                                                                                                                                                                                                                                                                                                                                                                                                                                                                                                                                                                                                                                                                                                                                                                                                                                                            |                     |                          |                                   |                                                                                                                                             |                                                   |                          |                                     |                          |                                                                           |                          |                                       |                          |                                    |                          |                                            |                          |                                      |                          |                                                                                                                                                                                                                                                                                                                                                                                                                                                                                                                                                                                                                                                                                                 |                             |                                                    |                                            |                                              |                          |                             |                             |                                   |                                    |                                            |                          |                                             |                                      |                                     |                          |                          |                                     |                          |  |                                            |                          |                                    |                          |                                                 |                                                                                                                                                                                                                                                                                                                                                                                                                                                                                                                                                                                                                                                                                                                                                                                                                                                                                                                                                                                                                                                                                                                                                                                                                                                                                                                                                                                                                                                                                                                                                                                                                                                                                                                                                                                                                                                                                                                                                                                                                                                                                                                                                                                                                                                                                                                                                                                                                                                                                                                                                                                                         |        |     |    |                             |                             |                             |                             |                             |                             |                             |                             |                             |                             |                             |                             |                             |                             |                             |                             |                             |                             |                             |                             |                             |                             |                             |                             |                             |                             |                             |                             |                             |                             |                             |                             |                             |                             |                             |                             |                             |                             |                             |                             |                             |                             |                             |                             |                             |                             |                             |                             |                             |                             |                             |                             |                             |                             |                             |                             |                             |
| 20. No symptoms before labor .....                                        | <input type="checkbox"/>                                                                                                                                                                                                                                                                                                                                                                                                                                                                                                                                                                                                                                                                                                                                                                                                                                                                                                             |                                                                                                                                                                                                                                                                                                                                                                                                                                                                                                                                                                                                                                                                                                                                                                                                                                                                                                                                                                                                                                                                                                                                                                                                                                                                                                                                                                                                                                                                                                                                                                                                                                                                                                                                                                                                                                                                                                                                                                                                            |                     |                          |                                   |                                                                                                                                             |                                                   |                          |                                     |                          |                                                                           |                          |                                       |                          |                                    |                          |                                            |                          |                                      |                          |                                                                                                                                                                                                                                                                                                                                                                                                                                                                                                                                                                                                                                                                                                 |                             |                                                    |                                            |                                              |                          |                             |                             |                                   |                                    |                                            |                          |                                             |                                      |                                     |                          |                          |                                     |                          |  |                                            |                          |                                    |                          |                                                 |                                                                                                                                                                                                                                                                                                                                                                                                                                                                                                                                                                                                                                                                                                                                                                                                                                                                                                                                                                                                                                                                                                                                                                                                                                                                                                                                                                                                                                                                                                                                                                                                                                                                                                                                                                                                                                                                                                                                                                                                                                                                                                                                                                                                                                                                                                                                                                                                                                                                                                                                                                                                         |        |     |    |                             |                             |                             |                             |                             |                             |                             |                             |                             |                             |                             |                             |                             |                             |                             |                             |                             |                             |                             |                             |                             |                             |                             |                             |                             |                             |                             |                             |                             |                             |                             |                             |                             |                             |                             |                             |                             |                             |                             |                             |                             |                             |                             |                             |                             |                             |                             |                             |                             |                             |                             |                             |                             |                             |                             |                             |                             |
| Before                                                                    | W/D                                                                                                                                                                                                                                                                                                                                                                                                                                                                                                                                                                                                                                                                                                                                                                                                                                                                                                                                  | DK                                                                                                                                                                                                                                                                                                                                                                                                                                                                                                                                                                                                                                                                                                                                                                                                                                                                                                                                                                                                                                                                                                                                                                                                                                                                                                                                                                                                                                                                                                                                                                                                                                                                                                                                                                                                                                                                                                                                                                                                         |                     |                          |                                   |                                                                                                                                             |                                                   |                          |                                     |                          |                                                                           |                          |                                       |                          |                                    |                          |                                            |                          |                                      |                          |                                                                                                                                                                                                                                                                                                                                                                                                                                                                                                                                                                                                                                                                                                 |                             |                                                    |                                            |                                              |                          |                             |                             |                                   |                                    |                                            |                          |                                             |                                      |                                     |                          |                          |                                     |                          |  |                                            |                          |                                    |                          |                                                 |                                                                                                                                                                                                                                                                                                                                                                                                                                                                                                                                                                                                                                                                                                                                                                                                                                                                                                                                                                                                                                                                                                                                                                                                                                                                                                                                                                                                                                                                                                                                                                                                                                                                                                                                                                                                                                                                                                                                                                                                                                                                                                                                                                                                                                                                                                                                                                                                                                                                                                                                                                                                         |        |     |    |                             |                             |                             |                             |                             |                             |                             |                             |                             |                             |                             |                             |                             |                             |                             |                             |                             |                             |                             |                             |                             |                             |                             |                             |                             |                             |                             |                             |                             |                             |                             |                             |                             |                             |                             |                             |                             |                             |                             |                             |                             |                             |                             |                             |                             |                             |                             |                             |                             |                             |                             |                             |                             |                             |                             |                             |                             |
| 1. <input type="checkbox"/>                                               | 2. <input type="checkbox"/>                                                                                                                                                                                                                                                                                                                                                                                                                                                                                                                                                                                                                                                                                                                                                                                                                                                                                                          | 9. <input type="checkbox"/>                                                                                                                                                                                                                                                                                                                                                                                                                                                                                                                                                                                                                                                                                                                                                                                                                                                                                                                                                                                                                                                                                                                                                                                                                                                                                                                                                                                                                                                                                                                                                                                                                                                                                                                                                                                                                                                                                                                                                                                |                     |                          |                                   |                                                                                                                                             |                                                   |                          |                                     |                          |                                                                           |                          |                                       |                          |                                    |                          |                                            |                          |                                      |                          |                                                                                                                                                                                                                                                                                                                                                                                                                                                                                                                                                                                                                                                                                                 |                             |                                                    |                                            |                                              |                          |                             |                             |                                   |                                    |                                            |                          |                                             |                                      |                                     |                          |                          |                                     |                          |  |                                            |                          |                                    |                          |                                                 |                                                                                                                                                                                                                                                                                                                                                                                                                                                                                                                                                                                                                                                                                                                                                                                                                                                                                                                                                                                                                                                                                                                                                                                                                                                                                                                                                                                                                                                                                                                                                                                                                                                                                                                                                                                                                                                                                                                                                                                                                                                                                                                                                                                                                                                                                                                                                                                                                                                                                                                                                                                                         |        |     |    |                             |                             |                             |                             |                             |                             |                             |                             |                             |                             |                             |                             |                             |                             |                             |                             |                             |                             |                             |                             |                             |                             |                             |                             |                             |                             |                             |                             |                             |                             |                             |                             |                             |                             |                             |                             |                             |                             |                             |                             |                             |                             |                             |                             |                             |                             |                             |                             |                             |                             |                             |                             |                             |                             |                             |                             |                             |
| 1. <input type="checkbox"/>                                               | 2. <input type="checkbox"/>                                                                                                                                                                                                                                                                                                                                                                                                                                                                                                                                                                                                                                                                                                                                                                                                                                                                                                          | 9. <input type="checkbox"/>                                                                                                                                                                                                                                                                                                                                                                                                                                                                                                                                                                                                                                                                                                                                                                                                                                                                                                                                                                                                                                                                                                                                                                                                                                                                                                                                                                                                                                                                                                                                                                                                                                                                                                                                                                                                                                                                                                                                                                                |                     |                          |                                   |                                                                                                                                             |                                                   |                          |                                     |                          |                                                                           |                          |                                       |                          |                                    |                          |                                            |                          |                                      |                          |                                                                                                                                                                                                                                                                                                                                                                                                                                                                                                                                                                                                                                                                                                 |                             |                                                    |                                            |                                              |                          |                             |                             |                                   |                                    |                                            |                          |                                             |                                      |                                     |                          |                          |                                     |                          |  |                                            |                          |                                    |                          |                                                 |                                                                                                                                                                                                                                                                                                                                                                                                                                                                                                                                                                                                                                                                                                                                                                                                                                                                                                                                                                                                                                                                                                                                                                                                                                                                                                                                                                                                                                                                                                                                                                                                                                                                                                                                                                                                                                                                                                                                                                                                                                                                                                                                                                                                                                                                                                                                                                                                                                                                                                                                                                                                         |        |     |    |                             |                             |                             |                             |                             |                             |                             |                             |                             |                             |                             |                             |                             |                             |                             |                             |                             |                             |                             |                             |                             |                             |                             |                             |                             |                             |                             |                             |                             |                             |                             |                             |                             |                             |                             |                             |                             |                             |                             |                             |                             |                             |                             |                             |                             |                             |                             |                             |                             |                             |                             |                             |                             |                             |                             |                             |                             |
| 1. <input type="checkbox"/>                                               | 2. <input type="checkbox"/>                                                                                                                                                                                                                                                                                                                                                                                                                                                                                                                                                                                                                                                                                                                                                                                                                                                                                                          | 9. <input type="checkbox"/>                                                                                                                                                                                                                                                                                                                                                                                                                                                                                                                                                                                                                                                                                                                                                                                                                                                                                                                                                                                                                                                                                                                                                                                                                                                                                                                                                                                                                                                                                                                                                                                                                                                                                                                                                                                                                                                                                                                                                                                |                     |                          |                                   |                                                                                                                                             |                                                   |                          |                                     |                          |                                                                           |                          |                                       |                          |                                    |                          |                                            |                          |                                      |                          |                                                                                                                                                                                                                                                                                                                                                                                                                                                                                                                                                                                                                                                                                                 |                             |                                                    |                                            |                                              |                          |                             |                             |                                   |                                    |                                            |                          |                                             |                                      |                                     |                          |                          |                                     |                          |  |                                            |                          |                                    |                          |                                                 |                                                                                                                                                                                                                                                                                                                                                                                                                                                                                                                                                                                                                                                                                                                                                                                                                                                                                                                                                                                                                                                                                                                                                                                                                                                                                                                                                                                                                                                                                                                                                                                                                                                                                                                                                                                                                                                                                                                                                                                                                                                                                                                                                                                                                                                                                                                                                                                                                                                                                                                                                                                                         |        |     |    |                             |                             |                             |                             |                             |                             |                             |                             |                             |                             |                             |                             |                             |                             |                             |                             |                             |                             |                             |                             |                             |                             |                             |                             |                             |                             |                             |                             |                             |                             |                             |                             |                             |                             |                             |                             |                             |                             |                             |                             |                             |                             |                             |                             |                             |                             |                             |                             |                             |                             |                             |                             |                             |                             |                             |                             |                             |
| 1. <input type="checkbox"/>                                               | 2. <input type="checkbox"/>                                                                                                                                                                                                                                                                                                                                                                                                                                                                                                                                                                                                                                                                                                                                                                                                                                                                                                          | 9. <input type="checkbox"/>                                                                                                                                                                                                                                                                                                                                                                                                                                                                                                                                                                                                                                                                                                                                                                                                                                                                                                                                                                                                                                                                                                                                                                                                                                                                                                                                                                                                                                                                                                                                                                                                                                                                                                                                                                                                                                                                                                                                                                                |                     |                          |                                   |                                                                                                                                             |                                                   |                          |                                     |                          |                                                                           |                          |                                       |                          |                                    |                          |                                            |                          |                                      |                          |                                                                                                                                                                                                                                                                                                                                                                                                                                                                                                                                                                                                                                                                                                 |                             |                                                    |                                            |                                              |                          |                             |                             |                                   |                                    |                                            |                          |                                             |                                      |                                     |                          |                          |                                     |                          |  |                                            |                          |                                    |                          |                                                 |                                                                                                                                                                                                                                                                                                                                                                                                                                                                                                                                                                                                                                                                                                                                                                                                                                                                                                                                                                                                                                                                                                                                                                                                                                                                                                                                                                                                                                                                                                                                                                                                                                                                                                                                                                                                                                                                                                                                                                                                                                                                                                                                                                                                                                                                                                                                                                                                                                                                                                                                                                                                         |        |     |    |                             |                             |                             |                             |                             |                             |                             |                             |                             |                             |                             |                             |                             |                             |                             |                             |                             |                             |                             |                             |                             |                             |                             |                             |                             |                             |                             |                             |                             |                             |                             |                             |                             |                             |                             |                             |                             |                             |                             |                             |                             |                             |                             |                             |                             |                             |                             |                             |                             |                             |                             |                             |                             |                             |                             |                             |                             |
| 1. <input type="checkbox"/>                                               | 2. <input type="checkbox"/>                                                                                                                                                                                                                                                                                                                                                                                                                                                                                                                                                                                                                                                                                                                                                                                                                                                                                                          | 9. <input type="checkbox"/>                                                                                                                                                                                                                                                                                                                                                                                                                                                                                                                                                                                                                                                                                                                                                                                                                                                                                                                                                                                                                                                                                                                                                                                                                                                                                                                                                                                                                                                                                                                                                                                                                                                                                                                                                                                                                                                                                                                                                                                |                     |                          |                                   |                                                                                                                                             |                                                   |                          |                                     |                          |                                                                           |                          |                                       |                          |                                    |                          |                                            |                          |                                      |                          |                                                                                                                                                                                                                                                                                                                                                                                                                                                                                                                                                                                                                                                                                                 |                             |                                                    |                                            |                                              |                          |                             |                             |                                   |                                    |                                            |                          |                                             |                                      |                                     |                          |                          |                                     |                          |  |                                            |                          |                                    |                          |                                                 |                                                                                                                                                                                                                                                                                                                                                                                                                                                                                                                                                                                                                                                                                                                                                                                                                                                                                                                                                                                                                                                                                                                                                                                                                                                                                                                                                                                                                                                                                                                                                                                                                                                                                                                                                                                                                                                                                                                                                                                                                                                                                                                                                                                                                                                                                                                                                                                                                                                                                                                                                                                                         |        |     |    |                             |                             |                             |                             |                             |                             |                             |                             |                             |                             |                             |                             |                             |                             |                             |                             |                             |                             |                             |                             |                             |                             |                             |                             |                             |                             |                             |                             |                             |                             |                             |                             |                             |                             |                             |                             |                             |                             |                             |                             |                             |                             |                             |                             |                             |                             |                             |                             |                             |                             |                             |                             |                             |                             |                             |                             |                             |
| 1. <input type="checkbox"/>                                               | 2. <input type="checkbox"/>                                                                                                                                                                                                                                                                                                                                                                                                                                                                                                                                                                                                                                                                                                                                                                                                                                                                                                          | 9. <input type="checkbox"/>                                                                                                                                                                                                                                                                                                                                                                                                                                                                                                                                                                                                                                                                                                                                                                                                                                                                                                                                                                                                                                                                                                                                                                                                                                                                                                                                                                                                                                                                                                                                                                                                                                                                                                                                                                                                                                                                                                                                                                                |                     |                          |                                   |                                                                                                                                             |                                                   |                          |                                     |                          |                                                                           |                          |                                       |                          |                                    |                          |                                            |                          |                                      |                          |                                                                                                                                                                                                                                                                                                                                                                                                                                                                                                                                                                                                                                                                                                 |                             |                                                    |                                            |                                              |                          |                             |                             |                                   |                                    |                                            |                          |                                             |                                      |                                     |                          |                          |                                     |                          |  |                                            |                          |                                    |                          |                                                 |                                                                                                                                                                                                                                                                                                                                                                                                                                                                                                                                                                                                                                                                                                                                                                                                                                                                                                                                                                                                                                                                                                                                                                                                                                                                                                                                                                                                                                                                                                                                                                                                                                                                                                                                                                                                                                                                                                                                                                                                                                                                                                                                                                                                                                                                                                                                                                                                                                                                                                                                                                                                         |        |     |    |                             |                             |                             |                             |                             |                             |                             |                             |                             |                             |                             |                             |                             |                             |                             |                             |                             |                             |                             |                             |                             |                             |                             |                             |                             |                             |                             |                             |                             |                             |                             |                             |                             |                             |                             |                             |                             |                             |                             |                             |                             |                             |                             |                             |                             |                             |                             |                             |                             |                             |                             |                             |                             |                             |                             |                             |                             |
| 1. <input type="checkbox"/>                                               | 2. <input type="checkbox"/>                                                                                                                                                                                                                                                                                                                                                                                                                                                                                                                                                                                                                                                                                                                                                                                                                                                                                                          | 9. <input type="checkbox"/>                                                                                                                                                                                                                                                                                                                                                                                                                                                                                                                                                                                                                                                                                                                                                                                                                                                                                                                                                                                                                                                                                                                                                                                                                                                                                                                                                                                                                                                                                                                                                                                                                                                                                                                                                                                                                                                                                                                                                                                |                     |                          |                                   |                                                                                                                                             |                                                   |                          |                                     |                          |                                                                           |                          |                                       |                          |                                    |                          |                                            |                          |                                      |                          |                                                                                                                                                                                                                                                                                                                                                                                                                                                                                                                                                                                                                                                                                                 |                             |                                                    |                                            |                                              |                          |                             |                             |                                   |                                    |                                            |                          |                                             |                                      |                                     |                          |                          |                                     |                          |  |                                            |                          |                                    |                          |                                                 |                                                                                                                                                                                                                                                                                                                                                                                                                                                                                                                                                                                                                                                                                                                                                                                                                                                                                                                                                                                                                                                                                                                                                                                                                                                                                                                                                                                                                                                                                                                                                                                                                                                                                                                                                                                                                                                                                                                                                                                                                                                                                                                                                                                                                                                                                                                                                                                                                                                                                                                                                                                                         |        |     |    |                             |                             |                             |                             |                             |                             |                             |                             |                             |                             |                             |                             |                             |                             |                             |                             |                             |                             |                             |                             |                             |                             |                             |                             |                             |                             |                             |                             |                             |                             |                             |                             |                             |                             |                             |                             |                             |                             |                             |                             |                             |                             |                             |                             |                             |                             |                             |                             |                             |                             |                             |                             |                             |                             |                             |                             |                             |
| 1. <input type="checkbox"/>                                               | 2. <input type="checkbox"/>                                                                                                                                                                                                                                                                                                                                                                                                                                                                                                                                                                                                                                                                                                                                                                                                                                                                                                          | 9. <input type="checkbox"/>                                                                                                                                                                                                                                                                                                                                                                                                                                                                                                                                                                                                                                                                                                                                                                                                                                                                                                                                                                                                                                                                                                                                                                                                                                                                                                                                                                                                                                                                                                                                                                                                                                                                                                                                                                                                                                                                                                                                                                                |                     |                          |                                   |                                                                                                                                             |                                                   |                          |                                     |                          |                                                                           |                          |                                       |                          |                                    |                          |                                            |                          |                                      |                          |                                                                                                                                                                                                                                                                                                                                                                                                                                                                                                                                                                                                                                                                                                 |                             |                                                    |                                            |                                              |                          |                             |                             |                                   |                                    |                                            |                          |                                             |                                      |                                     |                          |                          |                                     |                          |  |                                            |                          |                                    |                          |                                                 |                                                                                                                                                                                                                                                                                                                                                                                                                                                                                                                                                                                                                                                                                                                                                                                                                                                                                                                                                                                                                                                                                                                                                                                                                                                                                                                                                                                                                                                                                                                                                                                                                                                                                                                                                                                                                                                                                                                                                                                                                                                                                                                                                                                                                                                                                                                                                                                                                                                                                                                                                                                                         |        |     |    |                             |                             |                             |                             |                             |                             |                             |                             |                             |                             |                             |                             |                             |                             |                             |                             |                             |                             |                             |                             |                             |                             |                             |                             |                             |                             |                             |                             |                             |                             |                             |                             |                             |                             |                             |                             |                             |                             |                             |                             |                             |                             |                             |                             |                             |                             |                             |                             |                             |                             |                             |                             |                             |                             |                             |                             |                             |
| 1. <input type="checkbox"/>                                               | 2. <input type="checkbox"/>                                                                                                                                                                                                                                                                                                                                                                                                                                                                                                                                                                                                                                                                                                                                                                                                                                                                                                          | 9. <input type="checkbox"/>                                                                                                                                                                                                                                                                                                                                                                                                                                                                                                                                                                                                                                                                                                                                                                                                                                                                                                                                                                                                                                                                                                                                                                                                                                                                                                                                                                                                                                                                                                                                                                                                                                                                                                                                                                                                                                                                                                                                                                                |                     |                          |                                   |                                                                                                                                             |                                                   |                          |                                     |                          |                                                                           |                          |                                       |                          |                                    |                          |                                            |                          |                                      |                          |                                                                                                                                                                                                                                                                                                                                                                                                                                                                                                                                                                                                                                                                                                 |                             |                                                    |                                            |                                              |                          |                             |                             |                                   |                                    |                                            |                          |                                             |                                      |                                     |                          |                          |                                     |                          |  |                                            |                          |                                    |                          |                                                 |                                                                                                                                                                                                                                                                                                                                                                                                                                                                                                                                                                                                                                                                                                                                                                                                                                                                                                                                                                                                                                                                                                                                                                                                                                                                                                                                                                                                                                                                                                                                                                                                                                                                                                                                                                                                                                                                                                                                                                                                                                                                                                                                                                                                                                                                                                                                                                                                                                                                                                                                                                                                         |        |     |    |                             |                             |                             |                             |                             |                             |                             |                             |                             |                             |                             |                             |                             |                             |                             |                             |                             |                             |                             |                             |                             |                             |                             |                             |                             |                             |                             |                             |                             |                             |                             |                             |                             |                             |                             |                             |                             |                             |                             |                             |                             |                             |                             |                             |                             |                             |                             |                             |                             |                             |                             |                             |                             |                             |                             |                             |                             |
| 1. <input type="checkbox"/>                                               | 2. <input type="checkbox"/>                                                                                                                                                                                                                                                                                                                                                                                                                                                                                                                                                                                                                                                                                                                                                                                                                                                                                                          | 9. <input type="checkbox"/>                                                                                                                                                                                                                                                                                                                                                                                                                                                                                                                                                                                                                                                                                                                                                                                                                                                                                                                                                                                                                                                                                                                                                                                                                                                                                                                                                                                                                                                                                                                                                                                                                                                                                                                                                                                                                                                                                                                                                                                |                     |                          |                                   |                                                                                                                                             |                                                   |                          |                                     |                          |                                                                           |                          |                                       |                          |                                    |                          |                                            |                          |                                      |                          |                                                                                                                                                                                                                                                                                                                                                                                                                                                                                                                                                                                                                                                                                                 |                             |                                                    |                                            |                                              |                          |                             |                             |                                   |                                    |                                            |                          |                                             |                                      |                                     |                          |                          |                                     |                          |  |                                            |                          |                                    |                          |                                                 |                                                                                                                                                                                                                                                                                                                                                                                                                                                                                                                                                                                                                                                                                                                                                                                                                                                                                                                                                                                                                                                                                                                                                                                                                                                                                                                                                                                                                                                                                                                                                                                                                                                                                                                                                                                                                                                                                                                                                                                                                                                                                                                                                                                                                                                                                                                                                                                                                                                                                                                                                                                                         |        |     |    |                             |                             |                             |                             |                             |                             |                             |                             |                             |                             |                             |                             |                             |                             |                             |                             |                             |                             |                             |                             |                             |                             |                             |                             |                             |                             |                             |                             |                             |                             |                             |                             |                             |                             |                             |                             |                             |                             |                             |                             |                             |                             |                             |                             |                             |                             |                             |                             |                             |                             |                             |                             |                             |                             |                             |                             |                             |
| 1. <input type="checkbox"/>                                               | 2. <input type="checkbox"/>                                                                                                                                                                                                                                                                                                                                                                                                                                                                                                                                                                                                                                                                                                                                                                                                                                                                                                          | 9. <input type="checkbox"/>                                                                                                                                                                                                                                                                                                                                                                                                                                                                                                                                                                                                                                                                                                                                                                                                                                                                                                                                                                                                                                                                                                                                                                                                                                                                                                                                                                                                                                                                                                                                                                                                                                                                                                                                                                                                                                                                                                                                                                                |                     |                          |                                   |                                                                                                                                             |                                                   |                          |                                     |                          |                                                                           |                          |                                       |                          |                                    |                          |                                            |                          |                                      |                          |                                                                                                                                                                                                                                                                                                                                                                                                                                                                                                                                                                                                                                                                                                 |                             |                                                    |                                            |                                              |                          |                             |                             |                                   |                                    |                                            |                          |                                             |                                      |                                     |                          |                          |                                     |                          |  |                                            |                          |                                    |                          |                                                 |                                                                                                                                                                                                                                                                                                                                                                                                                                                                                                                                                                                                                                                                                                                                                                                                                                                                                                                                                                                                                                                                                                                                                                                                                                                                                                                                                                                                                                                                                                                                                                                                                                                                                                                                                                                                                                                                                                                                                                                                                                                                                                                                                                                                                                                                                                                                                                                                                                                                                                                                                                                                         |        |     |    |                             |                             |                             |                             |                             |                             |                             |                             |                             |                             |                             |                             |                             |                             |                             |                             |                             |                             |                             |                             |                             |                             |                             |                             |                             |                             |                             |                             |                             |                             |                             |                             |                             |                             |                             |                             |                             |                             |                             |                             |                             |                             |                             |                             |                             |                             |                             |                             |                             |                             |                             |                             |                             |                             |                             |                             |                             |
| 1. <input type="checkbox"/>                                               | 2. <input type="checkbox"/>                                                                                                                                                                                                                                                                                                                                                                                                                                                                                                                                                                                                                                                                                                                                                                                                                                                                                                          | 9. <input type="checkbox"/>                                                                                                                                                                                                                                                                                                                                                                                                                                                                                                                                                                                                                                                                                                                                                                                                                                                                                                                                                                                                                                                                                                                                                                                                                                                                                                                                                                                                                                                                                                                                                                                                                                                                                                                                                                                                                                                                                                                                                                                |                     |                          |                                   |                                                                                                                                             |                                                   |                          |                                     |                          |                                                                           |                          |                                       |                          |                                    |                          |                                            |                          |                                      |                          |                                                                                                                                                                                                                                                                                                                                                                                                                                                                                                                                                                                                                                                                                                 |                             |                                                    |                                            |                                              |                          |                             |                             |                                   |                                    |                                            |                          |                                             |                                      |                                     |                          |                          |                                     |                          |  |                                            |                          |                                    |                          |                                                 |                                                                                                                                                                                                                                                                                                                                                                                                                                                                                                                                                                                                                                                                                                                                                                                                                                                                                                                                                                                                                                                                                                                                                                                                                                                                                                                                                                                                                                                                                                                                                                                                                                                                                                                                                                                                                                                                                                                                                                                                                                                                                                                                                                                                                                                                                                                                                                                                                                                                                                                                                                                                         |        |     |    |                             |                             |                             |                             |                             |                             |                             |                             |                             |                             |                             |                             |                             |                             |                             |                             |                             |                             |                             |                             |                             |                             |                             |                             |                             |                             |                             |                             |                             |                             |                             |                             |                             |                             |                             |                             |                             |                             |                             |                             |                             |                             |                             |                             |                             |                             |                             |                             |                             |                             |                             |                             |                             |                             |                             |                             |                             |
| 1. <input type="checkbox"/>                                               | 2. <input type="checkbox"/>                                                                                                                                                                                                                                                                                                                                                                                                                                                                                                                                                                                                                                                                                                                                                                                                                                                                                                          | 9. <input type="checkbox"/>                                                                                                                                                                                                                                                                                                                                                                                                                                                                                                                                                                                                                                                                                                                                                                                                                                                                                                                                                                                                                                                                                                                                                                                                                                                                                                                                                                                                                                                                                                                                                                                                                                                                                                                                                                                                                                                                                                                                                                                |                     |                          |                                   |                                                                                                                                             |                                                   |                          |                                     |                          |                                                                           |                          |                                       |                          |                                    |                          |                                            |                          |                                      |                          |                                                                                                                                                                                                                                                                                                                                                                                                                                                                                                                                                                                                                                                                                                 |                             |                                                    |                                            |                                              |                          |                             |                             |                                   |                                    |                                            |                          |                                             |                                      |                                     |                          |                          |                                     |                          |  |                                            |                          |                                    |                          |                                                 |                                                                                                                                                                                                                                                                                                                                                                                                                                                                                                                                                                                                                                                                                                                                                                                                                                                                                                                                                                                                                                                                                                                                                                                                                                                                                                                                                                                                                                                                                                                                                                                                                                                                                                                                                                                                                                                                                                                                                                                                                                                                                                                                                                                                                                                                                                                                                                                                                                                                                                                                                                                                         |        |     |    |                             |                             |                             |                             |                             |                             |                             |                             |                             |                             |                             |                             |                             |                             |                             |                             |                             |                             |                             |                             |                             |                             |                             |                             |                             |                             |                             |                             |                             |                             |                             |                             |                             |                             |                             |                             |                             |                             |                             |                             |                             |                             |                             |                             |                             |                             |                             |                             |                             |                             |                             |                             |                             |                             |                             |                             |                             |
| 1. <input type="checkbox"/>                                               | 2. <input type="checkbox"/>                                                                                                                                                                                                                                                                                                                                                                                                                                                                                                                                                                                                                                                                                                                                                                                                                                                                                                          | 9. <input type="checkbox"/>                                                                                                                                                                                                                                                                                                                                                                                                                                                                                                                                                                                                                                                                                                                                                                                                                                                                                                                                                                                                                                                                                                                                                                                                                                                                                                                                                                                                                                                                                                                                                                                                                                                                                                                                                                                                                                                                                                                                                                                |                     |                          |                                   |                                                                                                                                             |                                                   |                          |                                     |                          |                                                                           |                          |                                       |                          |                                    |                          |                                            |                          |                                      |                          |                                                                                                                                                                                                                                                                                                                                                                                                                                                                                                                                                                                                                                                                                                 |                             |                                                    |                                            |                                              |                          |                             |                             |                                   |                                    |                                            |                          |                                             |                                      |                                     |                          |                          |                                     |                          |  |                                            |                          |                                    |                          |                                                 |                                                                                                                                                                                                                                                                                                                                                                                                                                                                                                                                                                                                                                                                                                                                                                                                                                                                                                                                                                                                                                                                                                                                                                                                                                                                                                                                                                                                                                                                                                                                                                                                                                                                                                                                                                                                                                                                                                                                                                                                                                                                                                                                                                                                                                                                                                                                                                                                                                                                                                                                                                                                         |        |     |    |                             |                             |                             |                             |                             |                             |                             |                             |                             |                             |                             |                             |                             |                             |                             |                             |                             |                             |                             |                             |                             |                             |                             |                             |                             |                             |                             |                             |                             |                             |                             |                             |                             |                             |                             |                             |                             |                             |                             |                             |                             |                             |                             |                             |                             |                             |                             |                             |                             |                             |                             |                             |                             |                             |                             |                             |                             |
| 1. <input type="checkbox"/>                                               | 2. <input type="checkbox"/>                                                                                                                                                                                                                                                                                                                                                                                                                                                                                                                                                                                                                                                                                                                                                                                                                                                                                                          | 9. <input type="checkbox"/>                                                                                                                                                                                                                                                                                                                                                                                                                                                                                                                                                                                                                                                                                                                                                                                                                                                                                                                                                                                                                                                                                                                                                                                                                                                                                                                                                                                                                                                                                                                                                                                                                                                                                                                                                                                                                                                                                                                                                                                |                     |                          |                                   |                                                                                                                                             |                                                   |                          |                                     |                          |                                                                           |                          |                                       |                          |                                    |                          |                                            |                          |                                      |                          |                                                                                                                                                                                                                                                                                                                                                                                                                                                                                                                                                                                                                                                                                                 |                             |                                                    |                                            |                                              |                          |                             |                             |                                   |                                    |                                            |                          |                                             |                                      |                                     |                          |                          |                                     |                          |  |                                            |                          |                                    |                          |                                                 |                                                                                                                                                                                                                                                                                                                                                                                                                                                                                                                                                                                                                                                                                                                                                                                                                                                                                                                                                                                                                                                                                                                                                                                                                                                                                                                                                                                                                                                                                                                                                                                                                                                                                                                                                                                                                                                                                                                                                                                                                                                                                                                                                                                                                                                                                                                                                                                                                                                                                                                                                                                                         |        |     |    |                             |                             |                             |                             |                             |                             |                             |                             |                             |                             |                             |                             |                             |                             |                             |                             |                             |                             |                             |                             |                             |                             |                             |                             |                             |                             |                             |                             |                             |                             |                             |                             |                             |                             |                             |                             |                             |                             |                             |                             |                             |                             |                             |                             |                             |                             |                             |                             |                             |                             |                             |                             |                             |                             |                             |                             |                             |
| 1. <input type="checkbox"/>                                               | 2. <input type="checkbox"/>                                                                                                                                                                                                                                                                                                                                                                                                                                                                                                                                                                                                                                                                                                                                                                                                                                                                                                          | 9. <input type="checkbox"/>                                                                                                                                                                                                                                                                                                                                                                                                                                                                                                                                                                                                                                                                                                                                                                                                                                                                                                                                                                                                                                                                                                                                                                                                                                                                                                                                                                                                                                                                                                                                                                                                                                                                                                                                                                                                                                                                                                                                                                                |                     |                          |                                   |                                                                                                                                             |                                                   |                          |                                     |                          |                                                                           |                          |                                       |                          |                                    |                          |                                            |                          |                                      |                          |                                                                                                                                                                                                                                                                                                                                                                                                                                                                                                                                                                                                                                                                                                 |                             |                                                    |                                            |                                              |                          |                             |                             |                                   |                                    |                                            |                          |                                             |                                      |                                     |                          |                          |                                     |                          |  |                                            |                          |                                    |                          |                                                 |                                                                                                                                                                                                                                                                                                                                                                                                                                                                                                                                                                                                                                                                                                                                                                                                                                                                                                                                                                                                                                                                                                                                                                                                                                                                                                                                                                                                                                                                                                                                                                                                                                                                                                                                                                                                                                                                                                                                                                                                                                                                                                                                                                                                                                                                                                                                                                                                                                                                                                                                                                                                         |        |     |    |                             |                             |                             |                             |                             |                             |                             |                             |                             |                             |                             |                             |                             |                             |                             |                             |                             |                             |                             |                             |                             |                             |                             |                             |                             |                             |                             |                             |                             |                             |                             |                             |                             |                             |                             |                             |                             |                             |                             |                             |                             |                             |                             |                             |                             |                             |                             |                             |                             |                             |                             |                             |                             |                             |                             |                             |                             |
| 1. <input type="checkbox"/>                                               | 2. <input type="checkbox"/>                                                                                                                                                                                                                                                                                                                                                                                                                                                                                                                                                                                                                                                                                                                                                                                                                                                                                                          | 9. <input type="checkbox"/>                                                                                                                                                                                                                                                                                                                                                                                                                                                                                                                                                                                                                                                                                                                                                                                                                                                                                                                                                                                                                                                                                                                                                                                                                                                                                                                                                                                                                                                                                                                                                                                                                                                                                                                                                                                                                                                                                                                                                                                |                     |                          |                                   |                                                                                                                                             |                                                   |                          |                                     |                          |                                                                           |                          |                                       |                          |                                    |                          |                                            |                          |                                      |                          |                                                                                                                                                                                                                                                                                                                                                                                                                                                                                                                                                                                                                                                                                                 |                             |                                                    |                                            |                                              |                          |                             |                             |                                   |                                    |                                            |                          |                                             |                                      |                                     |                          |                          |                                     |                          |  |                                            |                          |                                    |                          |                                                 |                                                                                                                                                                                                                                                                                                                                                                                                                                                                                                                                                                                                                                                                                                                                                                                                                                                                                                                                                                                                                                                                                                                                                                                                                                                                                                                                                                                                                                                                                                                                                                                                                                                                                                                                                                                                                                                                                                                                                                                                                                                                                                                                                                                                                                                                                                                                                                                                                                                                                                                                                                                                         |        |     |    |                             |                             |                             |                             |                             |                             |                             |                             |                             |                             |                             |                             |                             |                             |                             |                             |                             |                             |                             |                             |                             |                             |                             |                             |                             |                             |                             |                             |                             |                             |                             |                             |                             |                             |                             |                             |                             |                             |                             |                             |                             |                             |                             |                             |                             |                             |                             |                             |                             |                             |                             |                             |                             |                             |                             |                             |                             |
| 1. <input type="checkbox"/>                                               | 2. <input type="checkbox"/>                                                                                                                                                                                                                                                                                                                                                                                                                                                                                                                                                                                                                                                                                                                                                                                                                                                                                                          | 9. <input type="checkbox"/>                                                                                                                                                                                                                                                                                                                                                                                                                                                                                                                                                                                                                                                                                                                                                                                                                                                                                                                                                                                                                                                                                                                                                                                                                                                                                                                                                                                                                                                                                                                                                                                                                                                                                                                                                                                                                                                                                                                                                                                |                     |                          |                                   |                                                                                                                                             |                                                   |                          |                                     |                          |                                                                           |                          |                                       |                          |                                    |                          |                                            |                          |                                      |                          |                                                                                                                                                                                                                                                                                                                                                                                                                                                                                                                                                                                                                                                                                                 |                             |                                                    |                                            |                                              |                          |                             |                             |                                   |                                    |                                            |                          |                                             |                                      |                                     |                          |                          |                                     |                          |  |                                            |                          |                                    |                          |                                                 |                                                                                                                                                                                                                                                                                                                                                                                                                                                                                                                                                                                                                                                                                                                                                                                                                                                                                                                                                                                                                                                                                                                                                                                                                                                                                                                                                                                                                                                                                                                                                                                                                                                                                                                                                                                                                                                                                                                                                                                                                                                                                                                                                                                                                                                                                                                                                                                                                                                                                                                                                                                                         |        |     |    |                             |                             |                             |                             |                             |                             |                             |                             |                             |                             |                             |                             |                             |                             |                             |                             |                             |                             |                             |                             |                             |                             |                             |                             |                             |                             |                             |                             |                             |                             |                             |                             |                             |                             |                             |                             |                             |                             |                             |                             |                             |                             |                             |                             |                             |                             |                             |                             |                             |                             |                             |                             |                             |                             |                             |                             |                             |
| 1. <input type="checkbox"/>                                               | 2. <input type="checkbox"/>                                                                                                                                                                                                                                                                                                                                                                                                                                                                                                                                                                                                                                                                                                                                                                                                                                                                                                          | 9. <input type="checkbox"/>                                                                                                                                                                                                                                                                                                                                                                                                                                                                                                                                                                                                                                                                                                                                                                                                                                                                                                                                                                                                                                                                                                                                                                                                                                                                                                                                                                                                                                                                                                                                                                                                                                                                                                                                                                                                                                                                                                                                                                                |                     |                          |                                   |                                                                                                                                             |                                                   |                          |                                     |                          |                                                                           |                          |                                       |                          |                                    |                          |                                            |                          |                                      |                          |                                                                                                                                                                                                                                                                                                                                                                                                                                                                                                                                                                                                                                                                                                 |                             |                                                    |                                            |                                              |                          |                             |                             |                                   |                                    |                                            |                          |                                             |                                      |                                     |                          |                          |                                     |                          |  |                                            |                          |                                    |                          |                                                 |                                                                                                                                                                                                                                                                                                                                                                                                                                                                                                                                                                                                                                                                                                                                                                                                                                                                                                                                                                                                                                                                                                                                                                                                                                                                                                                                                                                                                                                                                                                                                                                                                                                                                                                                                                                                                                                                                                                                                                                                                                                                                                                                                                                                                                                                                                                                                                                                                                                                                                                                                                                                         |        |     |    |                             |                             |                             |                             |                             |                             |                             |                             |                             |                             |                             |                             |                             |                             |                             |                             |                             |                             |                             |                             |                             |                             |                             |                             |                             |                             |                             |                             |                             |                             |                             |                             |                             |                             |                             |                             |                             |                             |                             |                             |                             |                             |                             |                             |                             |                             |                             |                             |                             |                             |                             |                             |                             |                             |                             |                             |                             |
| <b>S4.2</b>                                                               | <p>Did (you / the mother) seek care from any person or health facility for (any of) the pregnancy symptom(s) that started <u>before</u> labor?</p> <p><i>[Read "...for any of..." if she had more than one pregnancy symptom.]</i></p>                                                                                                                                                                                                                                                                                                                                                                                                                                                                                                                                                                                                                                                                                               | <table style="width: 100%;"> <tr> <td>1. Yes</td> </tr> <tr> <td>2. No</td> </tr> <tr> <td>9. Don't know</td> </tr> </table>                                                                                                                                                                                                                                                                                                                                                                                                                                                                                                                                                                                                                                                                                                                                                                                                                                                                                                                                                                                                                                                                                                                                                                                                                                                                                                                                                                                                                                                                                                                                                                                                                                                                                                                                                                                                                                                                               | 1. Yes              | 2. No                    | 9. Don't know                     | <div style="font-size: 2em; margin-bottom: 5px;"><input type="checkbox"/></div> <p><b>2</b> → <i>SQ4.4</i><br/><b>9</b> → <i>Inst_2</i></p> |                                                   |                          |                                     |                          |                                                                           |                          |                                       |                          |                                    |                          |                                            |                          |                                      |                          |                                                                                                                                                                                                                                                                                                                                                                                                                                                                                                                                                                                                                                                                                                 |                             |                                                    |                                            |                                              |                          |                             |                             |                                   |                                    |                                            |                          |                                             |                                      |                                     |                          |                          |                                     |                          |  |                                            |                          |                                    |                          |                                                 |                                                                                                                                                                                                                                                                                                                                                                                                                                                                                                                                                                                                                                                                                                                                                                                                                                                                                                                                                                                                                                                                                                                                                                                                                                                                                                                                                                                                                                                                                                                                                                                                                                                                                                                                                                                                                                                                                                                                                                                                                                                                                                                                                                                                                                                                                                                                                                                                                                                                                                                                                                                                         |        |     |    |                             |                             |                             |                             |                             |                             |                             |                             |                             |                             |                             |                             |                             |                             |                             |                             |                             |                             |                             |                             |                             |                             |                             |                             |                             |                             |                             |                             |                             |                             |                             |                             |                             |                             |                             |                             |                             |                             |                             |                             |                             |                             |                             |                             |                             |                             |                             |                             |                             |                             |                             |                             |                             |                             |                             |                             |                             |
| 1. Yes                                                                    |                                                                                                                                                                                                                                                                                                                                                                                                                                                                                                                                                                                                                                                                                                                                                                                                                                                                                                                                      |                                                                                                                                                                                                                                                                                                                                                                                                                                                                                                                                                                                                                                                                                                                                                                                                                                                                                                                                                                                                                                                                                                                                                                                                                                                                                                                                                                                                                                                                                                                                                                                                                                                                                                                                                                                                                                                                                                                                                                                                            |                     |                          |                                   |                                                                                                                                             |                                                   |                          |                                     |                          |                                                                           |                          |                                       |                          |                                    |                          |                                            |                          |                                      |                          |                                                                                                                                                                                                                                                                                                                                                                                                                                                                                                                                                                                                                                                                                                 |                             |                                                    |                                            |                                              |                          |                             |                             |                                   |                                    |                                            |                          |                                             |                                      |                                     |                          |                          |                                     |                          |  |                                            |                          |                                    |                          |                                                 |                                                                                                                                                                                                                                                                                                                                                                                                                                                                                                                                                                                                                                                                                                                                                                                                                                                                                                                                                                                                                                                                                                                                                                                                                                                                                                                                                                                                                                                                                                                                                                                                                                                                                                                                                                                                                                                                                                                                                                                                                                                                                                                                                                                                                                                                                                                                                                                                                                                                                                                                                                                                         |        |     |    |                             |                             |                             |                             |                             |                             |                             |                             |                             |                             |                             |                             |                             |                             |                             |                             |                             |                             |                             |                             |                             |                             |                             |                             |                             |                             |                             |                             |                             |                             |                             |                             |                             |                             |                             |                             |                             |                             |                             |                             |                             |                             |                             |                             |                             |                             |                             |                             |                             |                             |                             |                             |                             |                             |                             |                             |                             |
| 2. No                                                                     |                                                                                                                                                                                                                                                                                                                                                                                                                                                                                                                                                                                                                                                                                                                                                                                                                                                                                                                                      |                                                                                                                                                                                                                                                                                                                                                                                                                                                                                                                                                                                                                                                                                                                                                                                                                                                                                                                                                                                                                                                                                                                                                                                                                                                                                                                                                                                                                                                                                                                                                                                                                                                                                                                                                                                                                                                                                                                                                                                                            |                     |                          |                                   |                                                                                                                                             |                                                   |                          |                                     |                          |                                                                           |                          |                                       |                          |                                    |                          |                                            |                          |                                      |                          |                                                                                                                                                                                                                                                                                                                                                                                                                                                                                                                                                                                                                                                                                                 |                             |                                                    |                                            |                                              |                          |                             |                             |                                   |                                    |                                            |                          |                                             |                                      |                                     |                          |                          |                                     |                          |  |                                            |                          |                                    |                          |                                                 |                                                                                                                                                                                                                                                                                                                                                                                                                                                                                                                                                                                                                                                                                                                                                                                                                                                                                                                                                                                                                                                                                                                                                                                                                                                                                                                                                                                                                                                                                                                                                                                                                                                                                                                                                                                                                                                                                                                                                                                                                                                                                                                                                                                                                                                                                                                                                                                                                                                                                                                                                                                                         |        |     |    |                             |                             |                             |                             |                             |                             |                             |                             |                             |                             |                             |                             |                             |                             |                             |                             |                             |                             |                             |                             |                             |                             |                             |                             |                             |                             |                             |                             |                             |                             |                             |                             |                             |                             |                             |                             |                             |                             |                             |                             |                             |                             |                             |                             |                             |                             |                             |                             |                             |                             |                             |                             |                             |                             |                             |                             |                             |
| 9. Don't know                                                             |                                                                                                                                                                                                                                                                                                                                                                                                                                                                                                                                                                                                                                                                                                                                                                                                                                                                                                                                      |                                                                                                                                                                                                                                                                                                                                                                                                                                                                                                                                                                                                                                                                                                                                                                                                                                                                                                                                                                                                                                                                                                                                                                                                                                                                                                                                                                                                                                                                                                                                                                                                                                                                                                                                                                                                                                                                                                                                                                                                            |                     |                          |                                   |                                                                                                                                             |                                                   |                          |                                     |                          |                                                                           |                          |                                       |                          |                                    |                          |                                            |                          |                                      |                          |                                                                                                                                                                                                                                                                                                                                                                                                                                                                                                                                                                                                                                                                                                 |                             |                                                    |                                            |                                              |                          |                             |                             |                                   |                                    |                                            |                          |                                             |                                      |                                     |                          |                          |                                     |                          |  |                                            |                          |                                    |                          |                                                 |                                                                                                                                                                                                                                                                                                                                                                                                                                                                                                                                                                                                                                                                                                                                                                                                                                                                                                                                                                                                                                                                                                                                                                                                                                                                                                                                                                                                                                                                                                                                                                                                                                                                                                                                                                                                                                                                                                                                                                                                                                                                                                                                                                                                                                                                                                                                                                                                                                                                                                                                                                                                         |        |     |    |                             |                             |                             |                             |                             |                             |                             |                             |                             |                             |                             |                             |                             |                             |                             |                             |                             |                             |                             |                             |                             |                             |                             |                             |                             |                             |                             |                             |                             |                             |                             |                             |                             |                             |                             |                             |                             |                             |                             |                             |                             |                             |                             |                             |                             |                             |                             |                             |                             |                             |                             |                             |                             |                             |                             |                             |                             |
| <b>S4.2.1</b>                                                             | <p>Where did (you / she) seek this care?</p> <p><i>Prompt: Was there anywhere else?</i></p> <p><i>[Multiple answers allowed.]</i></p>                                                                                                                                                                                                                                                                                                                                                                                                                                                                                                                                                                                                                                                                                                                                                                                                | <table style="width: 100%;"> <tr> <td>1. Hospital .....</td><td><input type="checkbox"/></td> </tr> <tr> <td>2. NGO or government clinic .....</td><td><input type="checkbox"/></td> </tr> <tr> <td>3. Private doctor/clinic .....</td><td><input type="checkbox"/></td> </tr> <tr> <td>4. Community nurse or midwife .....</td><td><input type="checkbox"/></td> </tr> <tr> <td>5. TBA/village doctor/quack/other non-formal or traditional provider.....</td><td><input type="checkbox"/></td> </tr> <tr> <td>6. Relative, neighbor or friend .....</td><td><input type="checkbox"/></td> </tr> <tr> <td>7. Other (specify).....</td><td><input type="checkbox"/></td> </tr> <tr> <td style="text-align: center;">( _____ )</td><td></td> </tr> <tr> <td>99. Don't know.....</td><td><input type="checkbox"/></td> </tr> </table>                                                                                                                                                                                                                                                                                                                                                                                                                                                                                                                                                                                                                                                                                                                                                                                                                                                                                                                                                                                                                                                                                                                                                                        | 1. Hospital .....   | <input type="checkbox"/> | 2. NGO or government clinic ..... | <input type="checkbox"/>                                                                                                                    | 3. Private doctor/clinic .....                    | <input type="checkbox"/> | 4. Community nurse or midwife ..... | <input type="checkbox"/> | 5. TBA/village doctor/quack/other non-formal or traditional provider..... | <input type="checkbox"/> | 6. Relative, neighbor or friend ..... | <input type="checkbox"/> | 7. Other (specify).....            | <input type="checkbox"/> | ( _____ )                                  |                          | 99. Don't know.....                  | <input type="checkbox"/> | <table style="width: 100%;"> <tr> <td>1. <input type="checkbox"/></td><td rowspan="2">} → = Health provider</td> </tr> <tr> <td>2. <input type="checkbox"/></td> </tr> <tr> <td>3. <input type="checkbox"/></td><td rowspan="2">} → <b>SQ4.4</b></td> </tr> <tr> <td>4. <input type="checkbox"/></td> </tr> <tr> <td>5. <input type="checkbox"/></td><td rowspan="2">} → <b>SQ4.4</b></td> </tr> <tr> <td>6. <input type="checkbox"/></td> </tr> <tr> <td>7. <input type="checkbox"/></td><td rowspan="2">} → <b>SQ4.4</b></td> </tr> <tr> <td>9. <input type="checkbox"/></td> </tr> </table>                                                                                                  | 1. <input type="checkbox"/> | } → = Health provider                              | 2. <input type="checkbox"/>                | 3. <input type="checkbox"/>                  | } → <b>SQ4.4</b>         | 4. <input type="checkbox"/> | 5. <input type="checkbox"/> | } → <b>SQ4.4</b>                  | 6. <input type="checkbox"/>        | 7. <input type="checkbox"/>                | } → <b>SQ4.4</b>         | 9. <input type="checkbox"/>                 |                                      |                                     |                          |                          |                                     |                          |  |                                            |                          |                                    |                          |                                                 |                                                                                                                                                                                                                                                                                                                                                                                                                                                                                                                                                                                                                                                                                                                                                                                                                                                                                                                                                                                                                                                                                                                                                                                                                                                                                                                                                                                                                                                                                                                                                                                                                                                                                                                                                                                                                                                                                                                                                                                                                                                                                                                                                                                                                                                                                                                                                                                                                                                                                                                                                                                                         |        |     |    |                             |                             |                             |                             |                             |                             |                             |                             |                             |                             |                             |                             |                             |                             |                             |                             |                             |                             |                             |                             |                             |                             |                             |                             |                             |                             |                             |                             |                             |                             |                             |                             |                             |                             |                             |                             |                             |                             |                             |                             |                             |                             |                             |                             |                             |                             |                             |                             |                             |                             |                             |                             |                             |                             |                             |                             |                             |
| 1. Hospital .....                                                         | <input type="checkbox"/>                                                                                                                                                                                                                                                                                                                                                                                                                                                                                                                                                                                                                                                                                                                                                                                                                                                                                                             |                                                                                                                                                                                                                                                                                                                                                                                                                                                                                                                                                                                                                                                                                                                                                                                                                                                                                                                                                                                                                                                                                                                                                                                                                                                                                                                                                                                                                                                                                                                                                                                                                                                                                                                                                                                                                                                                                                                                                                                                            |                     |                          |                                   |                                                                                                                                             |                                                   |                          |                                     |                          |                                                                           |                          |                                       |                          |                                    |                          |                                            |                          |                                      |                          |                                                                                                                                                                                                                                                                                                                                                                                                                                                                                                                                                                                                                                                                                                 |                             |                                                    |                                            |                                              |                          |                             |                             |                                   |                                    |                                            |                          |                                             |                                      |                                     |                          |                          |                                     |                          |  |                                            |                          |                                    |                          |                                                 |                                                                                                                                                                                                                                                                                                                                                                                                                                                                                                                                                                                                                                                                                                                                                                                                                                                                                                                                                                                                                                                                                                                                                                                                                                                                                                                                                                                                                                                                                                                                                                                                                                                                                                                                                                                                                                                                                                                                                                                                                                                                                                                                                                                                                                                                                                                                                                                                                                                                                                                                                                                                         |        |     |    |                             |                             |                             |                             |                             |                             |                             |                             |                             |                             |                             |                             |                             |                             |                             |                             |                             |                             |                             |                             |                             |                             |                             |                             |                             |                             |                             |                             |                             |                             |                             |                             |                             |                             |                             |                             |                             |                             |                             |                             |                             |                             |                             |                             |                             |                             |                             |                             |                             |                             |                             |                             |                             |                             |                             |                             |                             |
| 2. NGO or government clinic .....                                         | <input type="checkbox"/>                                                                                                                                                                                                                                                                                                                                                                                                                                                                                                                                                                                                                                                                                                                                                                                                                                                                                                             |                                                                                                                                                                                                                                                                                                                                                                                                                                                                                                                                                                                                                                                                                                                                                                                                                                                                                                                                                                                                                                                                                                                                                                                                                                                                                                                                                                                                                                                                                                                                                                                                                                                                                                                                                                                                                                                                                                                                                                                                            |                     |                          |                                   |                                                                                                                                             |                                                   |                          |                                     |                          |                                                                           |                          |                                       |                          |                                    |                          |                                            |                          |                                      |                          |                                                                                                                                                                                                                                                                                                                                                                                                                                                                                                                                                                                                                                                                                                 |                             |                                                    |                                            |                                              |                          |                             |                             |                                   |                                    |                                            |                          |                                             |                                      |                                     |                          |                          |                                     |                          |  |                                            |                          |                                    |                          |                                                 |                                                                                                                                                                                                                                                                                                                                                                                                                                                                                                                                                                                                                                                                                                                                                                                                                                                                                                                                                                                                                                                                                                                                                                                                                                                                                                                                                                                                                                                                                                                                                                                                                                                                                                                                                                                                                                                                                                                                                                                                                                                                                                                                                                                                                                                                                                                                                                                                                                                                                                                                                                                                         |        |     |    |                             |                             |                             |                             |                             |                             |                             |                             |                             |                             |                             |                             |                             |                             |                             |                             |                             |                             |                             |                             |                             |                             |                             |                             |                             |                             |                             |                             |                             |                             |                             |                             |                             |                             |                             |                             |                             |                             |                             |                             |                             |                             |                             |                             |                             |                             |                             |                             |                             |                             |                             |                             |                             |                             |                             |                             |                             |
| 3. Private doctor/clinic .....                                            | <input type="checkbox"/>                                                                                                                                                                                                                                                                                                                                                                                                                                                                                                                                                                                                                                                                                                                                                                                                                                                                                                             |                                                                                                                                                                                                                                                                                                                                                                                                                                                                                                                                                                                                                                                                                                                                                                                                                                                                                                                                                                                                                                                                                                                                                                                                                                                                                                                                                                                                                                                                                                                                                                                                                                                                                                                                                                                                                                                                                                                                                                                                            |                     |                          |                                   |                                                                                                                                             |                                                   |                          |                                     |                          |                                                                           |                          |                                       |                          |                                    |                          |                                            |                          |                                      |                          |                                                                                                                                                                                                                                                                                                                                                                                                                                                                                                                                                                                                                                                                                                 |                             |                                                    |                                            |                                              |                          |                             |                             |                                   |                                    |                                            |                          |                                             |                                      |                                     |                          |                          |                                     |                          |  |                                            |                          |                                    |                          |                                                 |                                                                                                                                                                                                                                                                                                                                                                                                                                                                                                                                                                                                                                                                                                                                                                                                                                                                                                                                                                                                                                                                                                                                                                                                                                                                                                                                                                                                                                                                                                                                                                                                                                                                                                                                                                                                                                                                                                                                                                                                                                                                                                                                                                                                                                                                                                                                                                                                                                                                                                                                                                                                         |        |     |    |                             |                             |                             |                             |                             |                             |                             |                             |                             |                             |                             |                             |                             |                             |                             |                             |                             |                             |                             |                             |                             |                             |                             |                             |                             |                             |                             |                             |                             |                             |                             |                             |                             |                             |                             |                             |                             |                             |                             |                             |                             |                             |                             |                             |                             |                             |                             |                             |                             |                             |                             |                             |                             |                             |                             |                             |                             |
| 4. Community nurse or midwife .....                                       | <input type="checkbox"/>                                                                                                                                                                                                                                                                                                                                                                                                                                                                                                                                                                                                                                                                                                                                                                                                                                                                                                             |                                                                                                                                                                                                                                                                                                                                                                                                                                                                                                                                                                                                                                                                                                                                                                                                                                                                                                                                                                                                                                                                                                                                                                                                                                                                                                                                                                                                                                                                                                                                                                                                                                                                                                                                                                                                                                                                                                                                                                                                            |                     |                          |                                   |                                                                                                                                             |                                                   |                          |                                     |                          |                                                                           |                          |                                       |                          |                                    |                          |                                            |                          |                                      |                          |                                                                                                                                                                                                                                                                                                                                                                                                                                                                                                                                                                                                                                                                                                 |                             |                                                    |                                            |                                              |                          |                             |                             |                                   |                                    |                                            |                          |                                             |                                      |                                     |                          |                          |                                     |                          |  |                                            |                          |                                    |                          |                                                 |                                                                                                                                                                                                                                                                                                                                                                                                                                                                                                                                                                                                                                                                                                                                                                                                                                                                                                                                                                                                                                                                                                                                                                                                                                                                                                                                                                                                                                                                                                                                                                                                                                                                                                                                                                                                                                                                                                                                                                                                                                                                                                                                                                                                                                                                                                                                                                                                                                                                                                                                                                                                         |        |     |    |                             |                             |                             |                             |                             |                             |                             |                             |                             |                             |                             |                             |                             |                             |                             |                             |                             |                             |                             |                             |                             |                             |                             |                             |                             |                             |                             |                             |                             |                             |                             |                             |                             |                             |                             |                             |                             |                             |                             |                             |                             |                             |                             |                             |                             |                             |                             |                             |                             |                             |                             |                             |                             |                             |                             |                             |                             |
| 5. TBA/village doctor/quack/other non-formal or traditional provider..... | <input type="checkbox"/>                                                                                                                                                                                                                                                                                                                                                                                                                                                                                                                                                                                                                                                                                                                                                                                                                                                                                                             |                                                                                                                                                                                                                                                                                                                                                                                                                                                                                                                                                                                                                                                                                                                                                                                                                                                                                                                                                                                                                                                                                                                                                                                                                                                                                                                                                                                                                                                                                                                                                                                                                                                                                                                                                                                                                                                                                                                                                                                                            |                     |                          |                                   |                                                                                                                                             |                                                   |                          |                                     |                          |                                                                           |                          |                                       |                          |                                    |                          |                                            |                          |                                      |                          |                                                                                                                                                                                                                                                                                                                                                                                                                                                                                                                                                                                                                                                                                                 |                             |                                                    |                                            |                                              |                          |                             |                             |                                   |                                    |                                            |                          |                                             |                                      |                                     |                          |                          |                                     |                          |  |                                            |                          |                                    |                          |                                                 |                                                                                                                                                                                                                                                                                                                                                                                                                                                                                                                                                                                                                                                                                                                                                                                                                                                                                                                                                                                                                                                                                                                                                                                                                                                                                                                                                                                                                                                                                                                                                                                                                                                                                                                                                                                                                                                                                                                                                                                                                                                                                                                                                                                                                                                                                                                                                                                                                                                                                                                                                                                                         |        |     |    |                             |                             |                             |                             |                             |                             |                             |                             |                             |                             |                             |                             |                             |                             |                             |                             |                             |                             |                             |                             |                             |                             |                             |                             |                             |                             |                             |                             |                             |                             |                             |                             |                             |                             |                             |                             |                             |                             |                             |                             |                             |                             |                             |                             |                             |                             |                             |                             |                             |                             |                             |                             |                             |                             |                             |                             |                             |
| 6. Relative, neighbor or friend .....                                     | <input type="checkbox"/>                                                                                                                                                                                                                                                                                                                                                                                                                                                                                                                                                                                                                                                                                                                                                                                                                                                                                                             |                                                                                                                                                                                                                                                                                                                                                                                                                                                                                                                                                                                                                                                                                                                                                                                                                                                                                                                                                                                                                                                                                                                                                                                                                                                                                                                                                                                                                                                                                                                                                                                                                                                                                                                                                                                                                                                                                                                                                                                                            |                     |                          |                                   |                                                                                                                                             |                                                   |                          |                                     |                          |                                                                           |                          |                                       |                          |                                    |                          |                                            |                          |                                      |                          |                                                                                                                                                                                                                                                                                                                                                                                                                                                                                                                                                                                                                                                                                                 |                             |                                                    |                                            |                                              |                          |                             |                             |                                   |                                    |                                            |                          |                                             |                                      |                                     |                          |                          |                                     |                          |  |                                            |                          |                                    |                          |                                                 |                                                                                                                                                                                                                                                                                                                                                                                                                                                                                                                                                                                                                                                                                                                                                                                                                                                                                                                                                                                                                                                                                                                                                                                                                                                                                                                                                                                                                                                                                                                                                                                                                                                                                                                                                                                                                                                                                                                                                                                                                                                                                                                                                                                                                                                                                                                                                                                                                                                                                                                                                                                                         |        |     |    |                             |                             |                             |                             |                             |                             |                             |                             |                             |                             |                             |                             |                             |                             |                             |                             |                             |                             |                             |                             |                             |                             |                             |                             |                             |                             |                             |                             |                             |                             |                             |                             |                             |                             |                             |                             |                             |                             |                             |                             |                             |                             |                             |                             |                             |                             |                             |                             |                             |                             |                             |                             |                             |                             |                             |                             |                             |
| 7. Other (specify).....                                                   | <input type="checkbox"/>                                                                                                                                                                                                                                                                                                                                                                                                                                                                                                                                                                                                                                                                                                                                                                                                                                                                                                             |                                                                                                                                                                                                                                                                                                                                                                                                                                                                                                                                                                                                                                                                                                                                                                                                                                                                                                                                                                                                                                                                                                                                                                                                                                                                                                                                                                                                                                                                                                                                                                                                                                                                                                                                                                                                                                                                                                                                                                                                            |                     |                          |                                   |                                                                                                                                             |                                                   |                          |                                     |                          |                                                                           |                          |                                       |                          |                                    |                          |                                            |                          |                                      |                          |                                                                                                                                                                                                                                                                                                                                                                                                                                                                                                                                                                                                                                                                                                 |                             |                                                    |                                            |                                              |                          |                             |                             |                                   |                                    |                                            |                          |                                             |                                      |                                     |                          |                          |                                     |                          |  |                                            |                          |                                    |                          |                                                 |                                                                                                                                                                                                                                                                                                                                                                                                                                                                                                                                                                                                                                                                                                                                                                                                                                                                                                                                                                                                                                                                                                                                                                                                                                                                                                                                                                                                                                                                                                                                                                                                                                                                                                                                                                                                                                                                                                                                                                                                                                                                                                                                                                                                                                                                                                                                                                                                                                                                                                                                                                                                         |        |     |    |                             |                             |                             |                             |                             |                             |                             |                             |                             |                             |                             |                             |                             |                             |                             |                             |                             |                             |                             |                             |                             |                             |                             |                             |                             |                             |                             |                             |                             |                             |                             |                             |                             |                             |                             |                             |                             |                             |                             |                             |                             |                             |                             |                             |                             |                             |                             |                             |                             |                             |                             |                             |                             |                             |                             |                             |                             |
| ( _____ )                                                                 |                                                                                                                                                                                                                                                                                                                                                                                                                                                                                                                                                                                                                                                                                                                                                                                                                                                                                                                                      |                                                                                                                                                                                                                                                                                                                                                                                                                                                                                                                                                                                                                                                                                                                                                                                                                                                                                                                                                                                                                                                                                                                                                                                                                                                                                                                                                                                                                                                                                                                                                                                                                                                                                                                                                                                                                                                                                                                                                                                                            |                     |                          |                                   |                                                                                                                                             |                                                   |                          |                                     |                          |                                                                           |                          |                                       |                          |                                    |                          |                                            |                          |                                      |                          |                                                                                                                                                                                                                                                                                                                                                                                                                                                                                                                                                                                                                                                                                                 |                             |                                                    |                                            |                                              |                          |                             |                             |                                   |                                    |                                            |                          |                                             |                                      |                                     |                          |                          |                                     |                          |  |                                            |                          |                                    |                          |                                                 |                                                                                                                                                                                                                                                                                                                                                                                                                                                                                                                                                                                                                                                                                                                                                                                                                                                                                                                                                                                                                                                                                                                                                                                                                                                                                                                                                                                                                                                                                                                                                                                                                                                                                                                                                                                                                                                                                                                                                                                                                                                                                                                                                                                                                                                                                                                                                                                                                                                                                                                                                                                                         |        |     |    |                             |                             |                             |                             |                             |                             |                             |                             |                             |                             |                             |                             |                             |                             |                             |                             |                             |                             |                             |                             |                             |                             |                             |                             |                             |                             |                             |                             |                             |                             |                             |                             |                             |                             |                             |                             |                             |                             |                             |                             |                             |                             |                             |                             |                             |                             |                             |                             |                             |                             |                             |                             |                             |                             |                             |                             |                             |
| 99. Don't know.....                                                       | <input type="checkbox"/>                                                                                                                                                                                                                                                                                                                                                                                                                                                                                                                                                                                                                                                                                                                                                                                                                                                                                                             |                                                                                                                                                                                                                                                                                                                                                                                                                                                                                                                                                                                                                                                                                                                                                                                                                                                                                                                                                                                                                                                                                                                                                                                                                                                                                                                                                                                                                                                                                                                                                                                                                                                                                                                                                                                                                                                                                                                                                                                                            |                     |                          |                                   |                                                                                                                                             |                                                   |                          |                                     |                          |                                                                           |                          |                                       |                          |                                    |                          |                                            |                          |                                      |                          |                                                                                                                                                                                                                                                                                                                                                                                                                                                                                                                                                                                                                                                                                                 |                             |                                                    |                                            |                                              |                          |                             |                             |                                   |                                    |                                            |                          |                                             |                                      |                                     |                          |                          |                                     |                          |  |                                            |                          |                                    |                          |                                                 |                                                                                                                                                                                                                                                                                                                                                                                                                                                                                                                                                                                                                                                                                                                                                                                                                                                                                                                                                                                                                                                                                                                                                                                                                                                                                                                                                                                                                                                                                                                                                                                                                                                                                                                                                                                                                                                                                                                                                                                                                                                                                                                                                                                                                                                                                                                                                                                                                                                                                                                                                                                                         |        |     |    |                             |                             |                             |                             |                             |                             |                             |                             |                             |                             |                             |                             |                             |                             |                             |                             |                             |                             |                             |                             |                             |                             |                             |                             |                             |                             |                             |                             |                             |                             |                             |                             |                             |                             |                             |                             |                             |                             |                             |                             |                             |                             |                             |                             |                             |                             |                             |                             |                             |                             |                             |                             |                             |                             |                             |                             |                             |
| 1. <input type="checkbox"/>                                               | } → = Health provider                                                                                                                                                                                                                                                                                                                                                                                                                                                                                                                                                                                                                                                                                                                                                                                                                                                                                                                |                                                                                                                                                                                                                                                                                                                                                                                                                                                                                                                                                                                                                                                                                                                                                                                                                                                                                                                                                                                                                                                                                                                                                                                                                                                                                                                                                                                                                                                                                                                                                                                                                                                                                                                                                                                                                                                                                                                                                                                                            |                     |                          |                                   |                                                                                                                                             |                                                   |                          |                                     |                          |                                                                           |                          |                                       |                          |                                    |                          |                                            |                          |                                      |                          |                                                                                                                                                                                                                                                                                                                                                                                                                                                                                                                                                                                                                                                                                                 |                             |                                                    |                                            |                                              |                          |                             |                             |                                   |                                    |                                            |                          |                                             |                                      |                                     |                          |                          |                                     |                          |  |                                            |                          |                                    |                          |                                                 |                                                                                                                                                                                                                                                                                                                                                                                                                                                                                                                                                                                                                                                                                                                                                                                                                                                                                                                                                                                                                                                                                                                                                                                                                                                                                                                                                                                                                                                                                                                                                                                                                                                                                                                                                                                                                                                                                                                                                                                                                                                                                                                                                                                                                                                                                                                                                                                                                                                                                                                                                                                                         |        |     |    |                             |                             |                             |                             |                             |                             |                             |                             |                             |                             |                             |                             |                             |                             |                             |                             |                             |                             |                             |                             |                             |                             |                             |                             |                             |                             |                             |                             |                             |                             |                             |                             |                             |                             |                             |                             |                             |                             |                             |                             |                             |                             |                             |                             |                             |                             |                             |                             |                             |                             |                             |                             |                             |                             |                             |                             |                             |
| 2. <input type="checkbox"/>                                               |                                                                                                                                                                                                                                                                                                                                                                                                                                                                                                                                                                                                                                                                                                                                                                                                                                                                                                                                      |                                                                                                                                                                                                                                                                                                                                                                                                                                                                                                                                                                                                                                                                                                                                                                                                                                                                                                                                                                                                                                                                                                                                                                                                                                                                                                                                                                                                                                                                                                                                                                                                                                                                                                                                                                                                                                                                                                                                                                                                            |                     |                          |                                   |                                                                                                                                             |                                                   |                          |                                     |                          |                                                                           |                          |                                       |                          |                                    |                          |                                            |                          |                                      |                          |                                                                                                                                                                                                                                                                                                                                                                                                                                                                                                                                                                                                                                                                                                 |                             |                                                    |                                            |                                              |                          |                             |                             |                                   |                                    |                                            |                          |                                             |                                      |                                     |                          |                          |                                     |                          |  |                                            |                          |                                    |                          |                                                 |                                                                                                                                                                                                                                                                                                                                                                                                                                                                                                                                                                                                                                                                                                                                                                                                                                                                                                                                                                                                                                                                                                                                                                                                                                                                                                                                                                                                                                                                                                                                                                                                                                                                                                                                                                                                                                                                                                                                                                                                                                                                                                                                                                                                                                                                                                                                                                                                                                                                                                                                                                                                         |        |     |    |                             |                             |                             |                             |                             |                             |                             |                             |                             |                             |                             |                             |                             |                             |                             |                             |                             |                             |                             |                             |                             |                             |                             |                             |                             |                             |                             |                             |                             |                             |                             |                             |                             |                             |                             |                             |                             |                             |                             |                             |                             |                             |                             |                             |                             |                             |                             |                             |                             |                             |                             |                             |                             |                             |                             |                             |                             |
| 3. <input type="checkbox"/>                                               | } → <b>SQ4.4</b>                                                                                                                                                                                                                                                                                                                                                                                                                                                                                                                                                                                                                                                                                                                                                                                                                                                                                                                     |                                                                                                                                                                                                                                                                                                                                                                                                                                                                                                                                                                                                                                                                                                                                                                                                                                                                                                                                                                                                                                                                                                                                                                                                                                                                                                                                                                                                                                                                                                                                                                                                                                                                                                                                                                                                                                                                                                                                                                                                            |                     |                          |                                   |                                                                                                                                             |                                                   |                          |                                     |                          |                                                                           |                          |                                       |                          |                                    |                          |                                            |                          |                                      |                          |                                                                                                                                                                                                                                                                                                                                                                                                                                                                                                                                                                                                                                                                                                 |                             |                                                    |                                            |                                              |                          |                             |                             |                                   |                                    |                                            |                          |                                             |                                      |                                     |                          |                          |                                     |                          |  |                                            |                          |                                    |                          |                                                 |                                                                                                                                                                                                                                                                                                                                                                                                                                                                                                                                                                                                                                                                                                                                                                                                                                                                                                                                                                                                                                                                                                                                                                                                                                                                                                                                                                                                                                                                                                                                                                                                                                                                                                                                                                                                                                                                                                                                                                                                                                                                                                                                                                                                                                                                                                                                                                                                                                                                                                                                                                                                         |        |     |    |                             |                             |                             |                             |                             |                             |                             |                             |                             |                             |                             |                             |                             |                             |                             |                             |                             |                             |                             |                             |                             |                             |                             |                             |                             |                             |                             |                             |                             |                             |                             |                             |                             |                             |                             |                             |                             |                             |                             |                             |                             |                             |                             |                             |                             |                             |                             |                             |                             |                             |                             |                             |                             |                             |                             |                             |                             |
| 4. <input type="checkbox"/>                                               |                                                                                                                                                                                                                                                                                                                                                                                                                                                                                                                                                                                                                                                                                                                                                                                                                                                                                                                                      |                                                                                                                                                                                                                                                                                                                                                                                                                                                                                                                                                                                                                                                                                                                                                                                                                                                                                                                                                                                                                                                                                                                                                                                                                                                                                                                                                                                                                                                                                                                                                                                                                                                                                                                                                                                                                                                                                                                                                                                                            |                     |                          |                                   |                                                                                                                                             |                                                   |                          |                                     |                          |                                                                           |                          |                                       |                          |                                    |                          |                                            |                          |                                      |                          |                                                                                                                                                                                                                                                                                                                                                                                                                                                                                                                                                                                                                                                                                                 |                             |                                                    |                                            |                                              |                          |                             |                             |                                   |                                    |                                            |                          |                                             |                                      |                                     |                          |                          |                                     |                          |  |                                            |                          |                                    |                          |                                                 |                                                                                                                                                                                                                                                                                                                                                                                                                                                                                                                                                                                                                                                                                                                                                                                                                                                                                                                                                                                                                                                                                                                                                                                                                                                                                                                                                                                                                                                                                                                                                                                                                                                                                                                                                                                                                                                                                                                                                                                                                                                                                                                                                                                                                                                                                                                                                                                                                                                                                                                                                                                                         |        |     |    |                             |                             |                             |                             |                             |                             |                             |                             |                             |                             |                             |                             |                             |                             |                             |                             |                             |                             |                             |                             |                             |                             |                             |                             |                             |                             |                             |                             |                             |                             |                             |                             |                             |                             |                             |                             |                             |                             |                             |                             |                             |                             |                             |                             |                             |                             |                             |                             |                             |                             |                             |                             |                             |                             |                             |                             |                             |
| 5. <input type="checkbox"/>                                               | } → <b>SQ4.4</b>                                                                                                                                                                                                                                                                                                                                                                                                                                                                                                                                                                                                                                                                                                                                                                                                                                                                                                                     |                                                                                                                                                                                                                                                                                                                                                                                                                                                                                                                                                                                                                                                                                                                                                                                                                                                                                                                                                                                                                                                                                                                                                                                                                                                                                                                                                                                                                                                                                                                                                                                                                                                                                                                                                                                                                                                                                                                                                                                                            |                     |                          |                                   |                                                                                                                                             |                                                   |                          |                                     |                          |                                                                           |                          |                                       |                          |                                    |                          |                                            |                          |                                      |                          |                                                                                                                                                                                                                                                                                                                                                                                                                                                                                                                                                                                                                                                                                                 |                             |                                                    |                                            |                                              |                          |                             |                             |                                   |                                    |                                            |                          |                                             |                                      |                                     |                          |                          |                                     |                          |  |                                            |                          |                                    |                          |                                                 |                                                                                                                                                                                                                                                                                                                                                                                                                                                                                                                                                                                                                                                                                                                                                                                                                                                                                                                                                                                                                                                                                                                                                                                                                                                                                                                                                                                                                                                                                                                                                                                                                                                                                                                                                                                                                                                                                                                                                                                                                                                                                                                                                                                                                                                                                                                                                                                                                                                                                                                                                                                                         |        |     |    |                             |                             |                             |                             |                             |                             |                             |                             |                             |                             |                             |                             |                             |                             |                             |                             |                             |                             |                             |                             |                             |                             |                             |                             |                             |                             |                             |                             |                             |                             |                             |                             |                             |                             |                             |                             |                             |                             |                             |                             |                             |                             |                             |                             |                             |                             |                             |                             |                             |                             |                             |                             |                             |                             |                             |                             |                             |
| 6. <input type="checkbox"/>                                               |                                                                                                                                                                                                                                                                                                                                                                                                                                                                                                                                                                                                                                                                                                                                                                                                                                                                                                                                      |                                                                                                                                                                                                                                                                                                                                                                                                                                                                                                                                                                                                                                                                                                                                                                                                                                                                                                                                                                                                                                                                                                                                                                                                                                                                                                                                                                                                                                                                                                                                                                                                                                                                                                                                                                                                                                                                                                                                                                                                            |                     |                          |                                   |                                                                                                                                             |                                                   |                          |                                     |                          |                                                                           |                          |                                       |                          |                                    |                          |                                            |                          |                                      |                          |                                                                                                                                                                                                                                                                                                                                                                                                                                                                                                                                                                                                                                                                                                 |                             |                                                    |                                            |                                              |                          |                             |                             |                                   |                                    |                                            |                          |                                             |                                      |                                     |                          |                          |                                     |                          |  |                                            |                          |                                    |                          |                                                 |                                                                                                                                                                                                                                                                                                                                                                                                                                                                                                                                                                                                                                                                                                                                                                                                                                                                                                                                                                                                                                                                                                                                                                                                                                                                                                                                                                                                                                                                                                                                                                                                                                                                                                                                                                                                                                                                                                                                                                                                                                                                                                                                                                                                                                                                                                                                                                                                                                                                                                                                                                                                         |        |     |    |                             |                             |                             |                             |                             |                             |                             |                             |                             |                             |                             |                             |                             |                             |                             |                             |                             |                             |                             |                             |                             |                             |                             |                             |                             |                             |                             |                             |                             |                             |                             |                             |                             |                             |                             |                             |                             |                             |                             |                             |                             |                             |                             |                             |                             |                             |                             |                             |                             |                             |                             |                             |                             |                             |                             |                             |                             |
| 7. <input type="checkbox"/>                                               | } → <b>SQ4.4</b>                                                                                                                                                                                                                                                                                                                                                                                                                                                                                                                                                                                                                                                                                                                                                                                                                                                                                                                     |                                                                                                                                                                                                                                                                                                                                                                                                                                                                                                                                                                                                                                                                                                                                                                                                                                                                                                                                                                                                                                                                                                                                                                                                                                                                                                                                                                                                                                                                                                                                                                                                                                                                                                                                                                                                                                                                                                                                                                                                            |                     |                          |                                   |                                                                                                                                             |                                                   |                          |                                     |                          |                                                                           |                          |                                       |                          |                                    |                          |                                            |                          |                                      |                          |                                                                                                                                                                                                                                                                                                                                                                                                                                                                                                                                                                                                                                                                                                 |                             |                                                    |                                            |                                              |                          |                             |                             |                                   |                                    |                                            |                          |                                             |                                      |                                     |                          |                          |                                     |                          |  |                                            |                          |                                    |                          |                                                 |                                                                                                                                                                                                                                                                                                                                                                                                                                                                                                                                                                                                                                                                                                                                                                                                                                                                                                                                                                                                                                                                                                                                                                                                                                                                                                                                                                                                                                                                                                                                                                                                                                                                                                                                                                                                                                                                                                                                                                                                                                                                                                                                                                                                                                                                                                                                                                                                                                                                                                                                                                                                         |        |     |    |                             |                             |                             |                             |                             |                             |                             |                             |                             |                             |                             |                             |                             |                             |                             |                             |                             |                             |                             |                             |                             |                             |                             |                             |                             |                             |                             |                             |                             |                             |                             |                             |                             |                             |                             |                             |                             |                             |                             |                             |                             |                             |                             |                             |                             |                             |                             |                             |                             |                             |                             |                             |                             |                             |                             |                             |                             |
| 9. <input type="checkbox"/>                                               |                                                                                                                                                                                                                                                                                                                                                                                                                                                                                                                                                                                                                                                                                                                                                                                                                                                                                                                                      |                                                                                                                                                                                                                                                                                                                                                                                                                                                                                                                                                                                                                                                                                                                                                                                                                                                                                                                                                                                                                                                                                                                                                                                                                                                                                                                                                                                                                                                                                                                                                                                                                                                                                                                                                                                                                                                                                                                                                                                                            |                     |                          |                                   |                                                                                                                                             |                                                   |                          |                                     |                          |                                                                           |                          |                                       |                          |                                    |                          |                                            |                          |                                      |                          |                                                                                                                                                                                                                                                                                                                                                                                                                                                                                                                                                                                                                                                                                                 |                             |                                                    |                                            |                                              |                          |                             |                             |                                   |                                    |                                            |                          |                                             |                                      |                                     |                          |                          |                                     |                          |  |                                            |                          |                                    |                          |                                                 |                                                                                                                                                                                                                                                                                                                                                                                                                                                                                                                                                                                                                                                                                                                                                                                                                                                                                                                                                                                                                                                                                                                                                                                                                                                                                                                                                                                                                                                                                                                                                                                                                                                                                                                                                                                                                                                                                                                                                                                                                                                                                                                                                                                                                                                                                                                                                                                                                                                                                                                                                                                                         |        |     |    |                             |                             |                             |                             |                             |                             |                             |                             |                             |                             |                             |                             |                             |                             |                             |                             |                             |                             |                             |                             |                             |                             |                             |                             |                             |                             |                             |                             |                             |                             |                             |                             |                             |                             |                             |                             |                             |                             |                             |                             |                             |                             |                             |                             |                             |                             |                             |                             |                             |                             |                             |                             |                             |                             |                             |                             |                             |
| <b>S4.3</b>                                                               | <p><i>If more than one symptom started before labor <u>and</u> she sought care from a health provider (SQ4.2.1 = 1-4), ask: For which symptom or symptoms that started <u>before</u> labor did (you / she) seek care from a health provider or facility?</i></p>                                                                                                                                                                                                                                                                                                                                                                                                                                                                                                                                                                                                                                                                     | <table style="width: 100%;"> <tr> <td>1. Convulsions.....</td><td><input type="checkbox"/></td> </tr> <tr> <td>2. High blood pressure .....</td><td><input type="checkbox"/></td> </tr> <tr> <td>3. Severe anemia or (pallor <u>and</u> SOB) ..</td><td><input type="checkbox"/></td> </tr> <tr> <td>4. Diabetes .....</td><td><input type="checkbox"/></td> </tr> <tr> <td>5. Severe headache .....</td><td><input type="checkbox"/></td> </tr> <tr> <td>6. Blurred vision.....</td><td><input type="checkbox"/></td> </tr> <tr> <td>7. Too weak to get out of bed.....</td><td><input type="checkbox"/></td> </tr> <tr> <td>8. Severe abdominal (not labor) pain ....</td><td><input type="checkbox"/></td> </tr> <tr> <td>9. Fast or difficult breathing .....</td><td><input type="checkbox"/></td> </tr> </table>                                                                                                                                                                                                                                                                                                                                                                                                                                                                                                                                                                                                                                                                                                                                                                                                                                                                                                                                                                                                                                                                                                                                                                                     | 1. Convulsions..... | <input type="checkbox"/> | 2. High blood pressure .....      | <input type="checkbox"/>                                                                                                                    | 3. Severe anemia or (pallor <u>and</u> SOB) ..    | <input type="checkbox"/> | 4. Diabetes .....                   | <input type="checkbox"/> | 5. Severe headache .....                                                  | <input type="checkbox"/> | 6. Blurred vision.....                | <input type="checkbox"/> | 7. Too weak to get out of bed..... | <input type="checkbox"/> | 8. Severe abdominal (not labor) pain ....  | <input type="checkbox"/> | 9. Fast or difficult breathing ..... | <input type="checkbox"/> | <table style="width: 100%;"> <tr> <td>10. Puffy face .....</td><td><input type="checkbox"/></td> </tr> <tr> <td>11. <u>Any</u> bleeding before labor .....</td><td><input type="checkbox"/></td> </tr> <tr> <td>12. – blank –</td><td></td> </tr> <tr> <td>13. Fever.....</td><td><input type="checkbox"/></td> </tr> <tr> <td>14. Smelly vaginal discharge .....</td><td><input type="checkbox"/></td> </tr> <tr> <td>15. – blank –</td><td></td> </tr> <tr> <td>16. Water broke ≥6 hrs bfr. labor ..</td><td><input type="checkbox"/></td> </tr> <tr> <td>17. – blank –</td><td></td> </tr> <tr> <td>18. Other (specified in SQ4.1).....</td><td><input type="checkbox"/></td> </tr> </table> | 10. Puffy face .....        | <input type="checkbox"/>                           | 11. <u>Any</u> bleeding before labor ..... | <input type="checkbox"/>                     | 12. – blank –            |                             | 13. Fever.....              | <input type="checkbox"/>          | 14. Smelly vaginal discharge ..... | <input type="checkbox"/>                   | 15. – blank –            |                                             | 16. Water broke ≥6 hrs bfr. labor .. | <input type="checkbox"/>            | 17. – blank –            |                          | 18. Other (specified in SQ4.1)..... | <input type="checkbox"/> |  |                                            |                          |                                    |                          |                                                 |                                                                                                                                                                                                                                                                                                                                                                                                                                                                                                                                                                                                                                                                                                                                                                                                                                                                                                                                                                                                                                                                                                                                                                                                                                                                                                                                                                                                                                                                                                                                                                                                                                                                                                                                                                                                                                                                                                                                                                                                                                                                                                                                                                                                                                                                                                                                                                                                                                                                                                                                                                                                         |        |     |    |                             |                             |                             |                             |                             |                             |                             |                             |                             |                             |                             |                             |                             |                             |                             |                             |                             |                             |                             |                             |                             |                             |                             |                             |                             |                             |                             |                             |                             |                             |                             |                             |                             |                             |                             |                             |                             |                             |                             |                             |                             |                             |                             |                             |                             |                             |                             |                             |                             |                             |                             |                             |                             |                             |                             |                             |                             |
| 1. Convulsions.....                                                       | <input type="checkbox"/>                                                                                                                                                                                                                                                                                                                                                                                                                                                                                                                                                                                                                                                                                                                                                                                                                                                                                                             |                                                                                                                                                                                                                                                                                                                                                                                                                                                                                                                                                                                                                                                                                                                                                                                                                                                                                                                                                                                                                                                                                                                                                                                                                                                                                                                                                                                                                                                                                                                                                                                                                                                                                                                                                                                                                                                                                                                                                                                                            |                     |                          |                                   |                                                                                                                                             |                                                   |                          |                                     |                          |                                                                           |                          |                                       |                          |                                    |                          |                                            |                          |                                      |                          |                                                                                                                                                                                                                                                                                                                                                                                                                                                                                                                                                                                                                                                                                                 |                             |                                                    |                                            |                                              |                          |                             |                             |                                   |                                    |                                            |                          |                                             |                                      |                                     |                          |                          |                                     |                          |  |                                            |                          |                                    |                          |                                                 |                                                                                                                                                                                                                                                                                                                                                                                                                                                                                                                                                                                                                                                                                                                                                                                                                                                                                                                                                                                                                                                                                                                                                                                                                                                                                                                                                                                                                                                                                                                                                                                                                                                                                                                                                                                                                                                                                                                                                                                                                                                                                                                                                                                                                                                                                                                                                                                                                                                                                                                                                                                                         |        |     |    |                             |                             |                             |                             |                             |                             |                             |                             |                             |                             |                             |                             |                             |                             |                             |                             |                             |                             |                             |                             |                             |                             |                             |                             |                             |                             |                             |                             |                             |                             |                             |                             |                             |                             |                             |                             |                             |                             |                             |                             |                             |                             |                             |                             |                             |                             |                             |                             |                             |                             |                             |                             |                             |                             |                             |                             |                             |
| 2. High blood pressure .....                                              | <input type="checkbox"/>                                                                                                                                                                                                                                                                                                                                                                                                                                                                                                                                                                                                                                                                                                                                                                                                                                                                                                             |                                                                                                                                                                                                                                                                                                                                                                                                                                                                                                                                                                                                                                                                                                                                                                                                                                                                                                                                                                                                                                                                                                                                                                                                                                                                                                                                                                                                                                                                                                                                                                                                                                                                                                                                                                                                                                                                                                                                                                                                            |                     |                          |                                   |                                                                                                                                             |                                                   |                          |                                     |                          |                                                                           |                          |                                       |                          |                                    |                          |                                            |                          |                                      |                          |                                                                                                                                                                                                                                                                                                                                                                                                                                                                                                                                                                                                                                                                                                 |                             |                                                    |                                            |                                              |                          |                             |                             |                                   |                                    |                                            |                          |                                             |                                      |                                     |                          |                          |                                     |                          |  |                                            |                          |                                    |                          |                                                 |                                                                                                                                                                                                                                                                                                                                                                                                                                                                                                                                                                                                                                                                                                                                                                                                                                                                                                                                                                                                                                                                                                                                                                                                                                                                                                                                                                                                                                                                                                                                                                                                                                                                                                                                                                                                                                                                                                                                                                                                                                                                                                                                                                                                                                                                                                                                                                                                                                                                                                                                                                                                         |        |     |    |                             |                             |                             |                             |                             |                             |                             |                             |                             |                             |                             |                             |                             |                             |                             |                             |                             |                             |                             |                             |                             |                             |                             |                             |                             |                             |                             |                             |                             |                             |                             |                             |                             |                             |                             |                             |                             |                             |                             |                             |                             |                             |                             |                             |                             |                             |                             |                             |                             |                             |                             |                             |                             |                             |                             |                             |                             |
| 3. Severe anemia or (pallor <u>and</u> SOB) ..                            | <input type="checkbox"/>                                                                                                                                                                                                                                                                                                                                                                                                                                                                                                                                                                                                                                                                                                                                                                                                                                                                                                             |                                                                                                                                                                                                                                                                                                                                                                                                                                                                                                                                                                                                                                                                                                                                                                                                                                                                                                                                                                                                                                                                                                                                                                                                                                                                                                                                                                                                                                                                                                                                                                                                                                                                                                                                                                                                                                                                                                                                                                                                            |                     |                          |                                   |                                                                                                                                             |                                                   |                          |                                     |                          |                                                                           |                          |                                       |                          |                                    |                          |                                            |                          |                                      |                          |                                                                                                                                                                                                                                                                                                                                                                                                                                                                                                                                                                                                                                                                                                 |                             |                                                    |                                            |                                              |                          |                             |                             |                                   |                                    |                                            |                          |                                             |                                      |                                     |                          |                          |                                     |                          |  |                                            |                          |                                    |                          |                                                 |                                                                                                                                                                                                                                                                                                                                                                                                                                                                                                                                                                                                                                                                                                                                                                                                                                                                                                                                                                                                                                                                                                                                                                                                                                                                                                                                                                                                                                                                                                                                                                                                                                                                                                                                                                                                                                                                                                                                                                                                                                                                                                                                                                                                                                                                                                                                                                                                                                                                                                                                                                                                         |        |     |    |                             |                             |                             |                             |                             |                             |                             |                             |                             |                             |                             |                             |                             |                             |                             |                             |                             |                             |                             |                             |                             |                             |                             |                             |                             |                             |                             |                             |                             |                             |                             |                             |                             |                             |                             |                             |                             |                             |                             |                             |                             |                             |                             |                             |                             |                             |                             |                             |                             |                             |                             |                             |                             |                             |                             |                             |                             |
| 4. Diabetes .....                                                         | <input type="checkbox"/>                                                                                                                                                                                                                                                                                                                                                                                                                                                                                                                                                                                                                                                                                                                                                                                                                                                                                                             |                                                                                                                                                                                                                                                                                                                                                                                                                                                                                                                                                                                                                                                                                                                                                                                                                                                                                                                                                                                                                                                                                                                                                                                                                                                                                                                                                                                                                                                                                                                                                                                                                                                                                                                                                                                                                                                                                                                                                                                                            |                     |                          |                                   |                                                                                                                                             |                                                   |                          |                                     |                          |                                                                           |                          |                                       |                          |                                    |                          |                                            |                          |                                      |                          |                                                                                                                                                                                                                                                                                                                                                                                                                                                                                                                                                                                                                                                                                                 |                             |                                                    |                                            |                                              |                          |                             |                             |                                   |                                    |                                            |                          |                                             |                                      |                                     |                          |                          |                                     |                          |  |                                            |                          |                                    |                          |                                                 |                                                                                                                                                                                                                                                                                                                                                                                                                                                                                                                                                                                                                                                                                                                                                                                                                                                                                                                                                                                                                                                                                                                                                                                                                                                                                                                                                                                                                                                                                                                                                                                                                                                                                                                                                                                                                                                                                                                                                                                                                                                                                                                                                                                                                                                                                                                                                                                                                                                                                                                                                                                                         |        |     |    |                             |                             |                             |                             |                             |                             |                             |                             |                             |                             |                             |                             |                             |                             |                             |                             |                             |                             |                             |                             |                             |                             |                             |                             |                             |                             |                             |                             |                             |                             |                             |                             |                             |                             |                             |                             |                             |                             |                             |                             |                             |                             |                             |                             |                             |                             |                             |                             |                             |                             |                             |                             |                             |                             |                             |                             |                             |
| 5. Severe headache .....                                                  | <input type="checkbox"/>                                                                                                                                                                                                                                                                                                                                                                                                                                                                                                                                                                                                                                                                                                                                                                                                                                                                                                             |                                                                                                                                                                                                                                                                                                                                                                                                                                                                                                                                                                                                                                                                                                                                                                                                                                                                                                                                                                                                                                                                                                                                                                                                                                                                                                                                                                                                                                                                                                                                                                                                                                                                                                                                                                                                                                                                                                                                                                                                            |                     |                          |                                   |                                                                                                                                             |                                                   |                          |                                     |                          |                                                                           |                          |                                       |                          |                                    |                          |                                            |                          |                                      |                          |                                                                                                                                                                                                                                                                                                                                                                                                                                                                                                                                                                                                                                                                                                 |                             |                                                    |                                            |                                              |                          |                             |                             |                                   |                                    |                                            |                          |                                             |                                      |                                     |                          |                          |                                     |                          |  |                                            |                          |                                    |                          |                                                 |                                                                                                                                                                                                                                                                                                                                                                                                                                                                                                                                                                                                                                                                                                                                                                                                                                                                                                                                                                                                                                                                                                                                                                                                                                                                                                                                                                                                                                                                                                                                                                                                                                                                                                                                                                                                                                                                                                                                                                                                                                                                                                                                                                                                                                                                                                                                                                                                                                                                                                                                                                                                         |        |     |    |                             |                             |                             |                             |                             |                             |                             |                             |                             |                             |                             |                             |                             |                             |                             |                             |                             |                             |                             |                             |                             |                             |                             |                             |                             |                             |                             |                             |                             |                             |                             |                             |                             |                             |                             |                             |                             |                             |                             |                             |                             |                             |                             |                             |                             |                             |                             |                             |                             |                             |                             |                             |                             |                             |                             |                             |                             |
| 6. Blurred vision.....                                                    | <input type="checkbox"/>                                                                                                                                                                                                                                                                                                                                                                                                                                                                                                                                                                                                                                                                                                                                                                                                                                                                                                             |                                                                                                                                                                                                                                                                                                                                                                                                                                                                                                                                                                                                                                                                                                                                                                                                                                                                                                                                                                                                                                                                                                                                                                                                                                                                                                                                                                                                                                                                                                                                                                                                                                                                                                                                                                                                                                                                                                                                                                                                            |                     |                          |                                   |                                                                                                                                             |                                                   |                          |                                     |                          |                                                                           |                          |                                       |                          |                                    |                          |                                            |                          |                                      |                          |                                                                                                                                                                                                                                                                                                                                                                                                                                                                                                                                                                                                                                                                                                 |                             |                                                    |                                            |                                              |                          |                             |                             |                                   |                                    |                                            |                          |                                             |                                      |                                     |                          |                          |                                     |                          |  |                                            |                          |                                    |                          |                                                 |                                                                                                                                                                                                                                                                                                                                                                                                                                                                                                                                                                                                                                                                                                                                                                                                                                                                                                                                                                                                                                                                                                                                                                                                                                                                                                                                                                                                                                                                                                                                                                                                                                                                                                                                                                                                                                                                                                                                                                                                                                                                                                                                                                                                                                                                                                                                                                                                                                                                                                                                                                                                         |        |     |    |                             |                             |                             |                             |                             |                             |                             |                             |                             |                             |                             |                             |                             |                             |                             |                             |                             |                             |                             |                             |                             |                             |                             |                             |                             |                             |                             |                             |                             |                             |                             |                             |                             |                             |                             |                             |                             |                             |                             |                             |                             |                             |                             |                             |                             |                             |                             |                             |                             |                             |                             |                             |                             |                             |                             |                             |                             |
| 7. Too weak to get out of bed.....                                        | <input type="checkbox"/>                                                                                                                                                                                                                                                                                                                                                                                                                                                                                                                                                                                                                                                                                                                                                                                                                                                                                                             |                                                                                                                                                                                                                                                                                                                                                                                                                                                                                                                                                                                                                                                                                                                                                                                                                                                                                                                                                                                                                                                                                                                                                                                                                                                                                                                                                                                                                                                                                                                                                                                                                                                                                                                                                                                                                                                                                                                                                                                                            |                     |                          |                                   |                                                                                                                                             |                                                   |                          |                                     |                          |                                                                           |                          |                                       |                          |                                    |                          |                                            |                          |                                      |                          |                                                                                                                                                                                                                                                                                                                                                                                                                                                                                                                                                                                                                                                                                                 |                             |                                                    |                                            |                                              |                          |                             |                             |                                   |                                    |                                            |                          |                                             |                                      |                                     |                          |                          |                                     |                          |  |                                            |                          |                                    |                          |                                                 |                                                                                                                                                                                                                                                                                                                                                                                                                                                                                                                                                                                                                                                                                                                                                                                                                                                                                                                                                                                                                                                                                                                                                                                                                                                                                                                                                                                                                                                                                                                                                                                                                                                                                                                                                                                                                                                                                                                                                                                                                                                                                                                                                                                                                                                                                                                                                                                                                                                                                                                                                                                                         |        |     |    |                             |                             |                             |                             |                             |                             |                             |                             |                             |                             |                             |                             |                             |                             |                             |                             |                             |                             |                             |                             |                             |                             |                             |                             |                             |                             |                             |                             |                             |                             |                             |                             |                             |                             |                             |                             |                             |                             |                             |                             |                             |                             |                             |                             |                             |                             |                             |                             |                             |                             |                             |                             |                             |                             |                             |                             |                             |
| 8. Severe abdominal (not labor) pain ....                                 | <input type="checkbox"/>                                                                                                                                                                                                                                                                                                                                                                                                                                                                                                                                                                                                                                                                                                                                                                                                                                                                                                             |                                                                                                                                                                                                                                                                                                                                                                                                                                                                                                                                                                                                                                                                                                                                                                                                                                                                                                                                                                                                                                                                                                                                                                                                                                                                                                                                                                                                                                                                                                                                                                                                                                                                                                                                                                                                                                                                                                                                                                                                            |                     |                          |                                   |                                                                                                                                             |                                                   |                          |                                     |                          |                                                                           |                          |                                       |                          |                                    |                          |                                            |                          |                                      |                          |                                                                                                                                                                                                                                                                                                                                                                                                                                                                                                                                                                                                                                                                                                 |                             |                                                    |                                            |                                              |                          |                             |                             |                                   |                                    |                                            |                          |                                             |                                      |                                     |                          |                          |                                     |                          |  |                                            |                          |                                    |                          |                                                 |                                                                                                                                                                                                                                                                                                                                                                                                                                                                                                                                                                                                                                                                                                                                                                                                                                                                                                                                                                                                                                                                                                                                                                                                                                                                                                                                                                                                                                                                                                                                                                                                                                                                                                                                                                                                                                                                                                                                                                                                                                                                                                                                                                                                                                                                                                                                                                                                                                                                                                                                                                                                         |        |     |    |                             |                             |                             |                             |                             |                             |                             |                             |                             |                             |                             |                             |                             |                             |                             |                             |                             |                             |                             |                             |                             |                             |                             |                             |                             |                             |                             |                             |                             |                             |                             |                             |                             |                             |                             |                             |                             |                             |                             |                             |                             |                             |                             |                             |                             |                             |                             |                             |                             |                             |                             |                             |                             |                             |                             |                             |                             |
| 9. Fast or difficult breathing .....                                      | <input type="checkbox"/>                                                                                                                                                                                                                                                                                                                                                                                                                                                                                                                                                                                                                                                                                                                                                                                                                                                                                                             |                                                                                                                                                                                                                                                                                                                                                                                                                                                                                                                                                                                                                                                                                                                                                                                                                                                                                                                                                                                                                                                                                                                                                                                                                                                                                                                                                                                                                                                                                                                                                                                                                                                                                                                                                                                                                                                                                                                                                                                                            |                     |                          |                                   |                                                                                                                                             |                                                   |                          |                                     |                          |                                                                           |                          |                                       |                          |                                    |                          |                                            |                          |                                      |                          |                                                                                                                                                                                                                                                                                                                                                                                                                                                                                                                                                                                                                                                                                                 |                             |                                                    |                                            |                                              |                          |                             |                             |                                   |                                    |                                            |                          |                                             |                                      |                                     |                          |                          |                                     |                          |  |                                            |                          |                                    |                          |                                                 |                                                                                                                                                                                                                                                                                                                                                                                                                                                                                                                                                                                                                                                                                                                                                                                                                                                                                                                                                                                                                                                                                                                                                                                                                                                                                                                                                                                                                                                                                                                                                                                                                                                                                                                                                                                                                                                                                                                                                                                                                                                                                                                                                                                                                                                                                                                                                                                                                                                                                                                                                                                                         |        |     |    |                             |                             |                             |                             |                             |                             |                             |                             |                             |                             |                             |                             |                             |                             |                             |                             |                             |                             |                             |                             |                             |                             |                             |                             |                             |                             |                             |                             |                             |                             |                             |                             |                             |                             |                             |                             |                             |                             |                             |                             |                             |                             |                             |                             |                             |                             |                             |                             |                             |                             |                             |                             |                             |                             |                             |                             |                             |
| 10. Puffy face .....                                                      | <input type="checkbox"/>                                                                                                                                                                                                                                                                                                                                                                                                                                                                                                                                                                                                                                                                                                                                                                                                                                                                                                             |                                                                                                                                                                                                                                                                                                                                                                                                                                                                                                                                                                                                                                                                                                                                                                                                                                                                                                                                                                                                                                                                                                                                                                                                                                                                                                                                                                                                                                                                                                                                                                                                                                                                                                                                                                                                                                                                                                                                                                                                            |                     |                          |                                   |                                                                                                                                             |                                                   |                          |                                     |                          |                                                                           |                          |                                       |                          |                                    |                          |                                            |                          |                                      |                          |                                                                                                                                                                                                                                                                                                                                                                                                                                                                                                                                                                                                                                                                                                 |                             |                                                    |                                            |                                              |                          |                             |                             |                                   |                                    |                                            |                          |                                             |                                      |                                     |                          |                          |                                     |                          |  |                                            |                          |                                    |                          |                                                 |                                                                                                                                                                                                                                                                                                                                                                                                                                                                                                                                                                                                                                                                                                                                                                                                                                                                                                                                                                                                                                                                                                                                                                                                                                                                                                                                                                                                                                                                                                                                                                                                                                                                                                                                                                                                                                                                                                                                                                                                                                                                                                                                                                                                                                                                                                                                                                                                                                                                                                                                                                                                         |        |     |    |                             |                             |                             |                             |                             |                             |                             |                             |                             |                             |                             |                             |                             |                             |                             |                             |                             |                             |                             |                             |                             |                             |                             |                             |                             |                             |                             |                             |                             |                             |                             |                             |                             |                             |                             |                             |                             |                             |                             |                             |                             |                             |                             |                             |                             |                             |                             |                             |                             |                             |                             |                             |                             |                             |                             |                             |                             |
| 11. <u>Any</u> bleeding before labor .....                                | <input type="checkbox"/>                                                                                                                                                                                                                                                                                                                                                                                                                                                                                                                                                                                                                                                                                                                                                                                                                                                                                                             |                                                                                                                                                                                                                                                                                                                                                                                                                                                                                                                                                                                                                                                                                                                                                                                                                                                                                                                                                                                                                                                                                                                                                                                                                                                                                                                                                                                                                                                                                                                                                                                                                                                                                                                                                                                                                                                                                                                                                                                                            |                     |                          |                                   |                                                                                                                                             |                                                   |                          |                                     |                          |                                                                           |                          |                                       |                          |                                    |                          |                                            |                          |                                      |                          |                                                                                                                                                                                                                                                                                                                                                                                                                                                                                                                                                                                                                                                                                                 |                             |                                                    |                                            |                                              |                          |                             |                             |                                   |                                    |                                            |                          |                                             |                                      |                                     |                          |                          |                                     |                          |  |                                            |                          |                                    |                          |                                                 |                                                                                                                                                                                                                                                                                                                                                                                                                                                                                                                                                                                                                                                                                                                                                                                                                                                                                                                                                                                                                                                                                                                                                                                                                                                                                                                                                                                                                                                                                                                                                                                                                                                                                                                                                                                                                                                                                                                                                                                                                                                                                                                                                                                                                                                                                                                                                                                                                                                                                                                                                                                                         |        |     |    |                             |                             |                             |                             |                             |                             |                             |                             |                             |                             |                             |                             |                             |                             |                             |                             |                             |                             |                             |                             |                             |                             |                             |                             |                             |                             |                             |                             |                             |                             |                             |                             |                             |                             |                             |                             |                             |                             |                             |                             |                             |                             |                             |                             |                             |                             |                             |                             |                             |                             |                             |                             |                             |                             |                             |                             |                             |
| 12. – blank –                                                             |                                                                                                                                                                                                                                                                                                                                                                                                                                                                                                                                                                                                                                                                                                                                                                                                                                                                                                                                      |                                                                                                                                                                                                                                                                                                                                                                                                                                                                                                                                                                                                                                                                                                                                                                                                                                                                                                                                                                                                                                                                                                                                                                                                                                                                                                                                                                                                                                                                                                                                                                                                                                                                                                                                                                                                                                                                                                                                                                                                            |                     |                          |                                   |                                                                                                                                             |                                                   |                          |                                     |                          |                                                                           |                          |                                       |                          |                                    |                          |                                            |                          |                                      |                          |                                                                                                                                                                                                                                                                                                                                                                                                                                                                                                                                                                                                                                                                                                 |                             |                                                    |                                            |                                              |                          |                             |                             |                                   |                                    |                                            |                          |                                             |                                      |                                     |                          |                          |                                     |                          |  |                                            |                          |                                    |                          |                                                 |                                                                                                                                                                                                                                                                                                                                                                                                                                                                                                                                                                                                                                                                                                                                                                                                                                                                                                                                                                                                                                                                                                                                                                                                                                                                                                                                                                                                                                                                                                                                                                                                                                                                                                                                                                                                                                                                                                                                                                                                                                                                                                                                                                                                                                                                                                                                                                                                                                                                                                                                                                                                         |        |     |    |                             |                             |                             |                             |                             |                             |                             |                             |                             |                             |                             |                             |                             |                             |                             |                             |                             |                             |                             |                             |                             |                             |                             |                             |                             |                             |                             |                             |                             |                             |                             |                             |                             |                             |                             |                             |                             |                             |                             |                             |                             |                             |                             |                             |                             |                             |                             |                             |                             |                             |                             |                             |                             |                             |                             |                             |                             |
| 13. Fever.....                                                            | <input type="checkbox"/>                                                                                                                                                                                                                                                                                                                                                                                                                                                                                                                                                                                                                                                                                                                                                                                                                                                                                                             |                                                                                                                                                                                                                                                                                                                                                                                                                                                                                                                                                                                                                                                                                                                                                                                                                                                                                                                                                                                                                                                                                                                                                                                                                                                                                                                                                                                                                                                                                                                                                                                                                                                                                                                                                                                                                                                                                                                                                                                                            |                     |                          |                                   |                                                                                                                                             |                                                   |                          |                                     |                          |                                                                           |                          |                                       |                          |                                    |                          |                                            |                          |                                      |                          |                                                                                                                                                                                                                                                                                                                                                                                                                                                                                                                                                                                                                                                                                                 |                             |                                                    |                                            |                                              |                          |                             |                             |                                   |                                    |                                            |                          |                                             |                                      |                                     |                          |                          |                                     |                          |  |                                            |                          |                                    |                          |                                                 |                                                                                                                                                                                                                                                                                                                                                                                                                                                                                                                                                                                                                                                                                                                                                                                                                                                                                                                                                                                                                                                                                                                                                                                                                                                                                                                                                                                                                                                                                                                                                                                                                                                                                                                                                                                                                                                                                                                                                                                                                                                                                                                                                                                                                                                                                                                                                                                                                                                                                                                                                                                                         |        |     |    |                             |                             |                             |                             |                             |                             |                             |                             |                             |                             |                             |                             |                             |                             |                             |                             |                             |                             |                             |                             |                             |                             |                             |                             |                             |                             |                             |                             |                             |                             |                             |                             |                             |                             |                             |                             |                             |                             |                             |                             |                             |                             |                             |                             |                             |                             |                             |                             |                             |                             |                             |                             |                             |                             |                             |                             |                             |
| 14. Smelly vaginal discharge .....                                        | <input type="checkbox"/>                                                                                                                                                                                                                                                                                                                                                                                                                                                                                                                                                                                                                                                                                                                                                                                                                                                                                                             |                                                                                                                                                                                                                                                                                                                                                                                                                                                                                                                                                                                                                                                                                                                                                                                                                                                                                                                                                                                                                                                                                                                                                                                                                                                                                                                                                                                                                                                                                                                                                                                                                                                                                                                                                                                                                                                                                                                                                                                                            |                     |                          |                                   |                                                                                                                                             |                                                   |                          |                                     |                          |                                                                           |                          |                                       |                          |                                    |                          |                                            |                          |                                      |                          |                                                                                                                                                                                                                                                                                                                                                                                                                                                                                                                                                                                                                                                                                                 |                             |                                                    |                                            |                                              |                          |                             |                             |                                   |                                    |                                            |                          |                                             |                                      |                                     |                          |                          |                                     |                          |  |                                            |                          |                                    |                          |                                                 |                                                                                                                                                                                                                                                                                                                                                                                                                                                                                                                                                                                                                                                                                                                                                                                                                                                                                                                                                                                                                                                                                                                                                                                                                                                                                                                                                                                                                                                                                                                                                                                                                                                                                                                                                                                                                                                                                                                                                                                                                                                                                                                                                                                                                                                                                                                                                                                                                                                                                                                                                                                                         |        |     |    |                             |                             |                             |                             |                             |                             |                             |                             |                             |                             |                             |                             |                             |                             |                             |                             |                             |                             |                             |                             |                             |                             |                             |                             |                             |                             |                             |                             |                             |                             |                             |                             |                             |                             |                             |                             |                             |                             |                             |                             |                             |                             |                             |                             |                             |                             |                             |                             |                             |                             |                             |                             |                             |                             |                             |                             |                             |
| 15. – blank –                                                             |                                                                                                                                                                                                                                                                                                                                                                                                                                                                                                                                                                                                                                                                                                                                                                                                                                                                                                                                      |                                                                                                                                                                                                                                                                                                                                                                                                                                                                                                                                                                                                                                                                                                                                                                                                                                                                                                                                                                                                                                                                                                                                                                                                                                                                                                                                                                                                                                                                                                                                                                                                                                                                                                                                                                                                                                                                                                                                                                                                            |                     |                          |                                   |                                                                                                                                             |                                                   |                          |                                     |                          |                                                                           |                          |                                       |                          |                                    |                          |                                            |                          |                                      |                          |                                                                                                                                                                                                                                                                                                                                                                                                                                                                                                                                                                                                                                                                                                 |                             |                                                    |                                            |                                              |                          |                             |                             |                                   |                                    |                                            |                          |                                             |                                      |                                     |                          |                          |                                     |                          |  |                                            |                          |                                    |                          |                                                 |                                                                                                                                                                                                                                                                                                                                                                                                                                                                                                                                                                                                                                                                                                                                                                                                                                                                                                                                                                                                                                                                                                                                                                                                                                                                                                                                                                                                                                                                                                                                                                                                                                                                                                                                                                                                                                                                                                                                                                                                                                                                                                                                                                                                                                                                                                                                                                                                                                                                                                                                                                                                         |        |     |    |                             |                             |                             |                             |                             |                             |                             |                             |                             |                             |                             |                             |                             |                             |                             |                             |                             |                             |                             |                             |                             |                             |                             |                             |                             |                             |                             |                             |                             |                             |                             |                             |                             |                             |                             |                             |                             |                             |                             |                             |                             |                             |                             |                             |                             |                             |                             |                             |                             |                             |                             |                             |                             |                             |                             |                             |                             |
| 16. Water broke ≥6 hrs bfr. labor ..                                      | <input type="checkbox"/>                                                                                                                                                                                                                                                                                                                                                                                                                                                                                                                                                                                                                                                                                                                                                                                                                                                                                                             |                                                                                                                                                                                                                                                                                                                                                                                                                                                                                                                                                                                                                                                                                                                                                                                                                                                                                                                                                                                                                                                                                                                                                                                                                                                                                                                                                                                                                                                                                                                                                                                                                                                                                                                                                                                                                                                                                                                                                                                                            |                     |                          |                                   |                                                                                                                                             |                                                   |                          |                                     |                          |                                                                           |                          |                                       |                          |                                    |                          |                                            |                          |                                      |                          |                                                                                                                                                                                                                                                                                                                                                                                                                                                                                                                                                                                                                                                                                                 |                             |                                                    |                                            |                                              |                          |                             |                             |                                   |                                    |                                            |                          |                                             |                                      |                                     |                          |                          |                                     |                          |  |                                            |                          |                                    |                          |                                                 |                                                                                                                                                                                                                                                                                                                                                                                                                                                                                                                                                                                                                                                                                                                                                                                                                                                                                                                                                                                                                                                                                                                                                                                                                                                                                                                                                                                                                                                                                                                                                                                                                                                                                                                                                                                                                                                                                                                                                                                                                                                                                                                                                                                                                                                                                                                                                                                                                                                                                                                                                                                                         |        |     |    |                             |                             |                             |                             |                             |                             |                             |                             |                             |                             |                             |                             |                             |                             |                             |                             |                             |                             |                             |                             |                             |                             |                             |                             |                             |                             |                             |                             |                             |                             |                             |                             |                             |                             |                             |                             |                             |                             |                             |                             |                             |                             |                             |                             |                             |                             |                             |                             |                             |                             |                             |                             |                             |                             |                             |                             |                             |
| 17. – blank –                                                             |                                                                                                                                                                                                                                                                                                                                                                                                                                                                                                                                                                                                                                                                                                                                                                                                                                                                                                                                      |                                                                                                                                                                                                                                                                                                                                                                                                                                                                                                                                                                                                                                                                                                                                                                                                                                                                                                                                                                                                                                                                                                                                                                                                                                                                                                                                                                                                                                                                                                                                                                                                                                                                                                                                                                                                                                                                                                                                                                                                            |                     |                          |                                   |                                                                                                                                             |                                                   |                          |                                     |                          |                                                                           |                          |                                       |                          |                                    |                          |                                            |                          |                                      |                          |                                                                                                                                                                                                                                                                                                                                                                                                                                                                                                                                                                                                                                                                                                 |                             |                                                    |                                            |                                              |                          |                             |                             |                                   |                                    |                                            |                          |                                             |                                      |                                     |                          |                          |                                     |                          |  |                                            |                          |                                    |                          |                                                 |                                                                                                                                                                                                                                                                                                                                                                                                                                                                                                                                                                                                                                                                                                                                                                                                                                                                                                                                                                                                                                                                                                                                                                                                                                                                                                                                                                                                                                                                                                                                                                                                                                                                                                                                                                                                                                                                                                                                                                                                                                                                                                                                                                                                                                                                                                                                                                                                                                                                                                                                                                                                         |        |     |    |                             |                             |                             |                             |                             |                             |                             |                             |                             |                             |                             |                             |                             |                             |                             |                             |                             |                             |                             |                             |                             |                             |                             |                             |                             |                             |                             |                             |                             |                             |                             |                             |                             |                             |                             |                             |                             |                             |                             |                             |                             |                             |                             |                             |                             |                             |                             |                             |                             |                             |                             |                             |                             |                             |                             |                             |                             |
| 18. Other (specified in SQ4.1).....                                       | <input type="checkbox"/>                                                                                                                                                                                                                                                                                                                                                                                                                                                                                                                                                                                                                                                                                                                                                                                                                                                                                                             |                                                                                                                                                                                                                                                                                                                                                                                                                                                                                                                                                                                                                                                                                                                                                                                                                                                                                                                                                                                                                                                                                                                                                                                                                                                                                                                                                                                                                                                                                                                                                                                                                                                                                                                                                                                                                                                                                                                                                                                                            |                     |                          |                                   |                                                                                                                                             |                                                   |                          |                                     |                          |                                                                           |                          |                                       |                          |                                    |                          |                                            |                          |                                      |                          |                                                                                                                                                                                                                                                                                                                                                                                                                                                                                                                                                                                                                                                                                                 |                             |                                                    |                                            |                                              |                          |                             |                             |                                   |                                    |                                            |                          |                                             |                                      |                                     |                          |                          |                                     |                          |  |                                            |                          |                                    |                          |                                                 |                                                                                                                                                                                                                                                                                                                                                                                                                                                                                                                                                                                                                                                                                                                                                                                                                                                                                                                                                                                                                                                                                                                                                                                                                                                                                                                                                                                                                                                                                                                                                                                                                                                                                                                                                                                                                                                                                                                                                                                                                                                                                                                                                                                                                                                                                                                                                                                                                                                                                                                                                                                                         |        |     |    |                             |                             |                             |                             |                             |                             |                             |                             |                             |                             |                             |                             |                             |                             |                             |                             |                             |                             |                             |                             |                             |                             |                             |                             |                             |                             |                             |                             |                             |                             |                             |                             |                             |                             |                             |                             |                             |                             |                             |                             |                             |                             |                             |                             |                             |                             |                             |                             |                             |                             |                             |                             |                             |                             |                             |                             |                             |

Study ID#

|                 |  |  |  |    |  |       |  |  |  |
|-----------------|--|--|--|----|--|-------|--|--|--|
|                 |  |  |  |    |  |       |  |  |  |
| Village/Cluster |  |  |  | HH |  | Child |  |  |  |

**CHILD HEALTH EPIDEMIOLOGY REFERENCE GROUP  
SB/NN/CHILD VERBAL/SOCIAL AUTOPSY QUESTIONNAIRE**

|                                                                                                                           |                                                                                                                                                                                                                                                                                                                                                                                                                                                                                                                                                                    |                                                                                                                                                                                                                                                                                                                                                                                                                                                                                                                                                                                                                                                              |                                                                                                                                                                                                                                                                                                                                                                                                                                                                         |
|---------------------------------------------------------------------------------------------------------------------------|--------------------------------------------------------------------------------------------------------------------------------------------------------------------------------------------------------------------------------------------------------------------------------------------------------------------------------------------------------------------------------------------------------------------------------------------------------------------------------------------------------------------------------------------------------------------|--------------------------------------------------------------------------------------------------------------------------------------------------------------------------------------------------------------------------------------------------------------------------------------------------------------------------------------------------------------------------------------------------------------------------------------------------------------------------------------------------------------------------------------------------------------------------------------------------------------------------------------------------------------|-------------------------------------------------------------------------------------------------------------------------------------------------------------------------------------------------------------------------------------------------------------------------------------------------------------------------------------------------------------------------------------------------------------------------------------------------------------------------|
| S4.4                                                                                                                      | <p>If she <u>never</u> went to a health provider (SQ4.2 = 2 or SQ4.2.1 ≠ 1-4) for any of the pregnancy symptoms, ask: Did (you / the mother) have any concerns or problems that kept (you / her) from going to a health provider or facility for the symptom(s) that started <u>before</u> labor?</p> <p>If she <u>went</u> to health provider (SQ4.2.1 = 1-4) for any pregnancy symptom(s), ask: Did (you / the mother) have to overcome any concerns or problems to go to a health provider or facility for the symptom(s) that started <u>before</u> labor?</p> | <p>1. Yes<br/>2. No<br/>9. Don't know</p>                                                                                                                                                                                                                                                                                                                                                                                                                                                                                                                                                                                                                    | <p><input type="checkbox"/> 2 or 9 → Inst_1</p>                                                                                                                                                                                                                                                                                                                                                                                                                         |
| S4.4.1                                                                                                                    | <p>What concerns or problems did (you / she) have?</p> <p><i>Prompt: Was there anything else?</i></p> <p><i>[Multiple answers allowed.]</i></p>                                                                                                                                                                                                                                                                                                                                                                                                                    | <p>1. Did not think was sick enough to need health care.....<br/>2. No one available to go with her .....<br/>3. Too much time from her regular duties...<br/>4. Someone else (<i>specify</i>) had to decide....<br/>5. Too far to travel .....<br/>6. No transportation available .....<br/>7. Cost (transport, health care, other).....<br/>8. Not satisfied with available health care...<br/>9. Symptom(s) required traditional care.....<br/>10. Thought she was too sick to travel.....<br/>11. Thought she/baby will die despite care.<br/>12. Fears exposure to male health provider<br/>13. Other (<i>specify</i>).....<br/>99. Don't know.....</p> | <p>1. <input type="checkbox"/><br/>2. <input type="checkbox"/><br/>3. <input type="checkbox"/><br/>4. <input type="checkbox"/><br/>5. <input type="checkbox"/><br/>6. <input type="checkbox"/><br/>7. <input type="checkbox"/><br/>8. <input type="checkbox"/><br/>9. <input type="checkbox"/><br/>10. <input type="checkbox"/><br/>11. <input type="checkbox"/><br/>12. <input type="checkbox"/><br/>13. <input type="checkbox"/><br/>99. <input type="checkbox"/></p> |
| <p><b>Inst_1: If SQ4.2 = 2 or SQ4.2.1 ≠ 1-4 (Never went to a health provider for any pregnancy symptoms) → Inst_2</b></p> |                                                                                                                                                                                                                                                                                                                                                                                                                                                                                                                                                                    |                                                                                                                                                                                                                                                                                                                                                                                                                                                                                                                                                                                                                                                              |                                                                                                                                                                                                                                                                                                                                                                                                                                                                         |
| S4.5                                                                                                                      | <p>Did any health provider or facility refer (you / her) to another health provider or facility for (any of) the symptom(s) that started <u>before</u> labor?</p>                                                                                                                                                                                                                                                                                                                                                                                                  | <p>1. Yes<br/>2. No<br/>9. Don't know</p>                                                                                                                                                                                                                                                                                                                                                                                                                                                                                                                                                                                                                    | <p><input type="checkbox"/> 2 or 9 → SQ4.6</p>                                                                                                                                                                                                                                                                                                                                                                                                                          |
| S4.5.1                                                                                                                    | <p>Did (you / she) go to the provider or facility to which (you were / she was) referred?</p>                                                                                                                                                                                                                                                                                                                                                                                                                                                                      | <p>1. Yes<br/>2. No<br/>9. Don't know</p>                                                                                                                                                                                                                                                                                                                                                                                                                                                                                                                                                                                                                    | <p><input type="checkbox"/></p>                                                                                                                                                                                                                                                                                                                                                                                                                                         |
| S4.6                                                                                                                      | <p>How many different health providers or facilities did (you / the mother) see for the pregnancy symptom(s) that started <u>before</u> labor?</p>                                                                                                                                                                                                                                                                                                                                                                                                                 |                                                                                                                                                                                                                                                                                                                                                                                                                                                                                                                                                                                                                                                              | <p>____ Health providers/facilities<br/>(DK = 99)</p>                                                                                                                                                                                                                                                                                                                                                                                                                   |
| S4.7                                                                                                                      | <p>(Were you / Was the mother) admitted to hospital for (any of) the symptom(s) that started <u>before</u> labor?</p>                                                                                                                                                                                                                                                                                                                                                                                                                                              | <p>1. Yes<br/>2. No<br/>9. Don't know</p>                                                                                                                                                                                                                                                                                                                                                                                                                                                                                                                                                                                                                    | <p><input type="checkbox"/></p>                                                                                                                                                                                                                                                                                                                                                                                                                                         |
| S4.8                                                                                                                      | <p>Please tell me everything that the provider(s) suggested that (you / the mother) do for the pregnancy symptom(s) at home?</p> <p><i>Prompt: Was there anything else?</i></p> <p><i>[Multiple answers allowed.]</i></p>                                                                                                                                                                                                                                                                                                                                          | <p>1. Take antibiotic by mouth.....<br/>2. Take antimalarial by mouth .....<br/>3. Take BP medicine by mouth.....<br/>4. Take other medicine by mouth .....<br/>5. Rest / bed rest / decrease work.....<br/>6. Return for follow-up visit(s).....<br/>7. Return or referred if worse.....<br/>8. Other (<i>specify</i>).....<br/>9. Nothing .....<br/>99. Don't know.....</p>                                                                                                                                                                                                                                                                                | <p>1. <input type="checkbox"/><br/>2. <input type="checkbox"/><br/>3. <input type="checkbox"/><br/>4. <input type="checkbox"/><br/>5. <input type="checkbox"/><br/>6. <input type="checkbox"/><br/>7. <input type="checkbox"/><br/>8. <input type="checkbox"/><br/>9. <input type="checkbox"/> → Inst_2<br/>99. <input type="checkbox"/> → Inst_2</p>                                                                                                                   |
| S4.9                                                                                                                      | <p>(Were you / Was the mother) able to follow <u>all</u> this advice?</p>                                                                                                                                                                                                                                                                                                                                                                                                                                                                                          | <p>1. Yes<br/>2. No<br/>9. Don't know</p>                                                                                                                                                                                                                                                                                                                                                                                                                                                                                                                                                                                                                    | <p><input type="checkbox"/> 9 → Inst_2</p>                                                                                                                                                                                                                                                                                                                                                                                                                              |

Study ID#

|                 |  |  |  |    |  |       |  |  |  |
|-----------------|--|--|--|----|--|-------|--|--|--|
|                 |  |  |  |    |  |       |  |  |  |
| Village/Cluster |  |  |  | HH |  | Child |  |  |  |

**CHILD HEALTH EPIDEMIOLOGY REFERENCE GROUP  
SB/NN/CHILD VERBAL/SOCIAL AUTOPSY QUESTIONNAIRE**

|                                                                          |                                                                                                                                                                                                                                                                                                                                  |                                                                                                                                                                                                                                                                                                                                                                                                                                                                                                                                                |                                                                                                                                                                                                                                                                                                                                                                                                                                                                                                                                                                                                                    |
|--------------------------------------------------------------------------|----------------------------------------------------------------------------------------------------------------------------------------------------------------------------------------------------------------------------------------------------------------------------------------------------------------------------------|------------------------------------------------------------------------------------------------------------------------------------------------------------------------------------------------------------------------------------------------------------------------------------------------------------------------------------------------------------------------------------------------------------------------------------------------------------------------------------------------------------------------------------------------|--------------------------------------------------------------------------------------------------------------------------------------------------------------------------------------------------------------------------------------------------------------------------------------------------------------------------------------------------------------------------------------------------------------------------------------------------------------------------------------------------------------------------------------------------------------------------------------------------------------------|
| S4.10                                                                    | <p><i>If <u>not</u> able to follow <u>all</u> the advice, ask:</i><br/>Did (you / she) have any concerns or problems that kept (you / her) from following the advice?</p> <p><i>If <u>able</u> to follow <u>all</u> the advice, ask:</i><br/>Did (you / she) have to overcome any concerns or problems to follow the advice?</p> | <p>1. Yes<br/>2. No<br/>9. Don't know</p>                                                                                                                                                                                                                                                                                                                                                                                                                                                                                                      | <p><input type="checkbox"/> 2 or 9 → Inst_2</p>                                                                                                                                                                                                                                                                                                                                                                                                                                                                                                                                                                    |
| S4.10.1                                                                  | <p>What concerns or problems did (you / she) have?</p> <p><i>Prompt: Was there anything else?</i></p> <p><i>[Multiple answers allowed.]</i></p>                                                                                                                                                                                  | <p>1. Did not understand instructions .....</p> <p>2. Too much time from her regular duties...</p> <p>3. Someone else (<i>specify</i>) decided .....</p> <p>4. Cost too much .....</p> <p>5. Problem required traditional care .....</p> <p>6. Advised care not needed or helpful .....</p> <p>7. Advised care might harm unborn child ...</p> <p>8. Thought she/baby will die despite care ..</p> <p>9. Other (<i>specify</i>).....</p> <p>99. Don't know.....</p>                                                                            | <p>1. <input type="checkbox"/><br/>2. <input type="checkbox"/><br/>3. <input type="checkbox"/><br/>4. <input type="checkbox"/><br/>5. <input type="checkbox"/><br/>6. <input type="checkbox"/><br/>7. <input type="checkbox"/><br/>8. <input type="checkbox"/><br/>9. <input type="checkbox"/><br/>99. <input type="checkbox"/></p>                                                                                                                                                                                                                                                                                |
| <b>Inst_2: Refer to SQ4.1: If no labor or delivery symptoms → Inst_8</b> |                                                                                                                                                                                                                                                                                                                                  |                                                                                                                                                                                                                                                                                                                                                                                                                                                                                                                                                |                                                                                                                                                                                                                                                                                                                                                                                                                                                                                                                                                                                                                    |
| S4.11                                                                    | <p>Now let's talk about the labor and delivery symptom(s). You said earlier that the symptom(s) that started <u>with</u> or <u>during</u> labor or delivery (was / were) &lt;SYMPTOM(S)&gt;.</p> <p><i>[Read and mark the SQ4.1 symptom(s) confirmed by the respondent. Correct the SQ4.1 responses if necessary.]</i></p>       | <p>1. Convulsions..... <input type="checkbox"/></p> <p>2. High blood pressure ..... <input type="checkbox"/></p> <p>3. Severe anemia or (pallor and SOB) .. <input type="checkbox"/></p> <p>4. – blank –</p> <p>5. Severe headache ..... <input type="checkbox"/></p> <p>6. Blurred vision..... <input type="checkbox"/></p> <p>7. Too weak to get out of bed..... <input type="checkbox"/></p> <p>8. Severe abdominal (not labor) pain .... <input type="checkbox"/></p> <p>9. Fast or difficult breathing ..... <input type="checkbox"/></p> | <p>10. Puffy face ..... <input type="checkbox"/></p> <p>11. <u>Any</u> bleeding before labor ..... <input type="checkbox"/></p> <p>12. Excess bleed during L or D ..... <input type="checkbox"/></p> <p>13. Fever..... <input type="checkbox"/></p> <p>14. Smelly vaginal discharge ..... <input type="checkbox"/></p> <p>15. Early/preterm labor (&lt;9 mnth) . <input type="checkbox"/></p> <p>16. Water broke ≥6 hrs bfr. labor .. <input type="checkbox"/></p> <p>17. Labor for 12 hours or more ..... <input type="checkbox"/></p> <p>18. Other (<i>specified in SQ4.1</i>)..... <input type="checkbox"/></p> |
| S4.12                                                                    | <p>Where (were you / was the mother) when (this / the first) symptom began?</p> <p><i>[Read "...the first..." if she had more than one labor or delivery symptom.]</i></p>                                                                                                                                                       | <p>1. Home<br/>2. On route to a health provider or facility<br/>3. At the health provider or facility where she went for normal labor<br/>4. Other (<i>specify</i>).....<br/>9. Don't know</p>                                                                                                                                                                                                                                                                                                                                                 | <p><input type="checkbox"/> 3 → SQ4.17</p>                                                                                                                                                                                                                                                                                                                                                                                                                                                                                                                                                                         |
| S4.13                                                                    | <p>Did (you / she) <u>ever</u> receive, <u>seek</u> or <u>try to seek</u> any care or treatment for (<u>any</u> of) the labor or delivery symptom(s)?</p> <p><i>[Read "...any of the symptoms" if she had more than one symptom.]</i></p>                                                                                        | <p>1. Yes<br/>2. No<br/>9. Don't know</p>                                                                                                                                                                                                                                                                                                                                                                                                                                                                                                      | <p><input type="checkbox"/> 2 → SQ4.14<br/>9 → SQ4.17</p>                                                                                                                                                                                                                                                                                                                                                                                                                                                                                                                                                          |
| S4.13.1                                                                  | <p>What was the <u>first</u> thing (you / she) did for the symptom(s)?</p> <p><i>[Mark <u>only</u> the <u>first</u> action taken.]</i></p>                                                                                                                                                                                       | <p>1. Home treatment (at her own home, or by a relative, neighbor, or friend) <u>Sought or tried to seek</u> care from a:<br/>2. Hospital<br/>3. NGO or government clinic<br/>4. Private doctor/clinic<br/>5. Community nurse or midwife<br/>6. Pharmacist or drug seller<br/>7. TBA/village doctor/quack/other non-formal or traditional provider<br/>8. Other (<i>specify</i>) .....</p>                                                                                                                                                     | <p><input type="checkbox"/> <input type="checkbox"/> 99 → SQ4.16</p>                                                                                                                                                                                                                                                                                                                                                                                                                                                                                                                                               |
| S4.14                                                                    | <p>Who decided that this was the right thing to do (at that time)?</p> <p><i>[Read "...at that time" if she received or sought any care or treatment.]</i></p> <p><i>[Only one response allowed. Record the main decision maker.]</i></p>                                                                                        | <p>1. The woman, herself<br/>2. Her husband<br/>3. Her mother<br/>4. Her mother-in-law<br/>5. Her father-in-law<br/>6. Other (<i>specify</i>) .....</p>                                                                                                                                                                                                                                                                                                                                                                                        | <p><input type="checkbox"/></p>                                                                                                                                                                                                                                                                                                                                                                                                                                                                                                                                                                                    |

Study ID#

|                 |  |  |  |    |  |       |  |  |  |
|-----------------|--|--|--|----|--|-------|--|--|--|
|                 |  |  |  |    |  |       |  |  |  |
| Village/Cluster |  |  |  | HH |  | Child |  |  |  |

**CHILD HEALTH EPIDEMIOLOGY REFERENCE GROUP  
SB/NN/CHILD VERBAL/SOCIAL AUTOPSY QUESTIONNAIRE**

|                                                                                                                                                     |                                                                                                                                                                                                                                                                                                                                                                                                                                                                                                                                                    |                                                                                                                                                                                                                                                                                                                                                                                                                                                                                                                                                                                                                                                                                                                                           |                                                                                                                                                                                                                                                                                                                                                                                                                                                                                                                      |
|-----------------------------------------------------------------------------------------------------------------------------------------------------|----------------------------------------------------------------------------------------------------------------------------------------------------------------------------------------------------------------------------------------------------------------------------------------------------------------------------------------------------------------------------------------------------------------------------------------------------------------------------------------------------------------------------------------------------|-------------------------------------------------------------------------------------------------------------------------------------------------------------------------------------------------------------------------------------------------------------------------------------------------------------------------------------------------------------------------------------------------------------------------------------------------------------------------------------------------------------------------------------------------------------------------------------------------------------------------------------------------------------------------------------------------------------------------------------------|----------------------------------------------------------------------------------------------------------------------------------------------------------------------------------------------------------------------------------------------------------------------------------------------------------------------------------------------------------------------------------------------------------------------------------------------------------------------------------------------------------------------|
| S4.15                                                                                                                                               | <p>If she did <u>not</u> go to a health provider (SQ4.13 = 2 or SQ4.13.1 = 1 or 6-8), ask: Did (you / the mother) have any concerns or problems that kept (you / her) from going to a health provider (at that time)?</p> <p><i>Do <u>not</u> read "...at that time?" if she <u>never</u> received or sought any care or treatment (SQ4.13 = 2).</i></p> <p>If she <u>went</u> to a health provider (SQ4.13.1 = 2-5), ask: Did (you / the mother) have to overcome any concerns or problems to go to the &lt;HEALTH PROVIDER&gt; at that time?</p> | <p>1. Yes<br/>2. No<br/>9. Don't know</p>                                                                                                                                                                                                                                                                                                                                                                                                                                                                                                                                                                                                                                                                                                 | <p><input type="checkbox"/> 2 or 9 →</p> <p style="text-align: right;"><i>Inst_2.5 (if SQ4.13 = 2), or<br/>Inst_3 (if SQ4.13.1 = 2-5)</i></p>                                                                                                                                                                                                                                                                                                                                                                        |
| S4.15.1                                                                                                                                             | <p>What concerns or problems did (you / she) have?</p> <p><i>Prompt: Was there anything else?</i></p> <p><i>[Multiple answers allowed.]</i></p>                                                                                                                                                                                                                                                                                                                                                                                                    | <p>1. Did not think she was sick enough to need health care.....<br/>2. No one available to go with her .....<br/>3. Too much time from her regular duties...<br/>4. Someone else had to decide (<i>specify</i>)...<br/>5. Too far to travel .....<br/>6. No transportation available.....<br/>7. Cost (transport, health care, other).....<br/>8. Not satisfied with available health care...<br/>9. Symptom(s) required traditional care.....<br/>10. Thought she was too sick to travel.....<br/>11. Thought she/baby will die despite care.<br/>12. Was late at night (transportation or provider not available) .....<br/>13. Fears exposure to male health provider<br/>14. Other (<i>specify</i>).....<br/>99. Don't know.....</p> | <p>1. <input type="checkbox"/><br/>2. <input type="checkbox"/><br/>3. <input type="checkbox"/><br/>4. <input type="checkbox"/> _____<br/>5. <input type="checkbox"/><br/>6. <input type="checkbox"/><br/>7. <input type="checkbox"/><br/>8. <input type="checkbox"/><br/>9. <input type="checkbox"/><br/>10. <input type="checkbox"/><br/>11. <input type="checkbox"/><br/>12. <input type="checkbox"/><br/>13. <input type="checkbox"/><br/>14. <input type="checkbox"/> _____<br/>99. <input type="checkbox"/></p> |
| <p><b>Inst_2.5: If SQ4.13 = 2 → SQ4.17</b><br/><b>Inst_3: If SQ4.13.1 = 2-5 (First <u>went</u> to a health provider or facility) → SQ4.16.1</b></p> |                                                                                                                                                                                                                                                                                                                                                                                                                                                                                                                                                    |                                                                                                                                                                                                                                                                                                                                                                                                                                                                                                                                                                                                                                                                                                                                           |                                                                                                                                                                                                                                                                                                                                                                                                                                                                                                                      |
| S4.16                                                                                                                                               | <p>Did (you / she) <u>ever seek or try to seek</u> care from a health provider or facility for (any of) the labor or delivery symptom(s)?</p>                                                                                                                                                                                                                                                                                                                                                                                                      | <p>1. Yes<br/>2. No<br/>9. Don't know</p>                                                                                                                                                                                                                                                                                                                                                                                                                                                                                                                                                                                                                                                                                                 | <p><input type="checkbox"/> 2 or 9 → SQ4.17</p>                                                                                                                                                                                                                                                                                                                                                                                                                                                                      |
| S4.16.1                                                                                                                                             | <p>Please tell me all the types of health providers and facilities where (you / she) <u>sought or tried to seek</u> care for (any of) the labor or delivery symptom(s).</p> <p><i>Prompt: Anywhere else?</i></p> <p><i>[Multiple answers allowed.]</i></p>                                                                                                                                                                                                                                                                                         | <p>1. Hospital .....<br/>2. NGO or government clinic .....<br/>3. Private doctor/clinic .....<br/>4. Community nurse or midwife .....<br/>9. Don't know.....</p>                                                                                                                                                                                                                                                                                                                                                                                                                                                                                                                                                                          | <p>1. <input type="checkbox"/><br/>2. <input type="checkbox"/><br/>3. <input type="checkbox"/><br/>4. <input type="checkbox"/><br/>9. <input type="checkbox"/></p>                                                                                                                                                                                                                                                                                                                                                   |
| S4.17                                                                                                                                               | <p><i>Refer to SQ3.8 to determine the delivery place. Discuss with respondent to confirm or correct the delivery place.</i></p> <p><i>Discuss &amp; resolve inconsistencies, for example, if SQ4.13 or 4.16 = "No," but the mother delivered in a health facility.</i></p>                                                                                                                                                                                                                                                                         | <p>1. Hospital<br/>2. Other health provider or facility<br/>3. On route to a health provider or facility<br/>4. Home<br/>5. Other (<i>specify</i>).....<br/>9. Don't know</p>                                                                                                                                                                                                                                                                                                                                                                                                                                                                                                                                                             | <p><input type="checkbox"/> 1-3 = Health provider</p> <p>_____</p>                                                                                                                                                                                                                                                                                                                                                                                                                                                   |
| S4.18                                                                                                                                               | <p>So, including where (you / the mother) <u>went or tried to go</u> for the labor or delivery symptom(s) <u>and</u> for the delivery, how many health providers or facilities did (you / she) go to?</p> <p><i>[If SQ4.16 = 2 and SQ4.17 = 4 or 5 → record '00' health providers/facilities]</i><br/><i>[If SQ4.16 = 2 and SQ4.17 = 1-3 → record '01' health provider/facility]</i><br/><i>[If SQ4.16 = 2 and SQ4.17 = 9 → record '99' health providers/facilities]</i><br/><i>[If SQ4.16 = 9 → record '99' health providers/facilities]</i></p>  |                                                                                                                                                                                                                                                                                                                                                                                                                                                                                                                                                                                                                                                                                                                                           | <p>_____ Health providers/facilities</p>                                                                                                                                                                                                                                                                                                                                                                                                                                                                             |



**Inst\_4: If SQ4.12 = 3 (Symptoms began at the health provider where she went for normal labor) → SQ4.22**

**Inst\_5: If SQ4.16 = 2 or 9 & SQ4.17 = 4-9 (No health provider seen/sought for the symptoms/delivery) → Inst\_8**

**Inst\_5.5: If SQ4.1 = only 1 labor or delivery symptom OR If SQ4.16 = 2 or 9 → SQ4.21**

|       |                                                                                                                                                                                                            |                                  |                                          |
|-------|------------------------------------------------------------------------------------------------------------------------------------------------------------------------------------------------------------|----------------------------------|------------------------------------------|
| S4.19 | Was there any particular symptom or symptoms for which (you / the mother) went to the (first) health provider?<br><br><i>[Read "...the first health provider?" if she went to more than one provider.]</i> | 1. Yes<br>2. No<br>9. Don't know | <input type="checkbox"/> 2 or 9 → SQ4.21 |
|-------|------------------------------------------------------------------------------------------------------------------------------------------------------------------------------------------------------------|----------------------------------|------------------------------------------|

|       |                                          |                                                                                                                                                                                                                                                                                                                                                                                                                                                                                                                |                                                                                                                                                                                                                                                                                                                                                                                                                                                                                                                                                                 |
|-------|------------------------------------------|----------------------------------------------------------------------------------------------------------------------------------------------------------------------------------------------------------------------------------------------------------------------------------------------------------------------------------------------------------------------------------------------------------------------------------------------------------------------------------------------------------------|-----------------------------------------------------------------------------------------------------------------------------------------------------------------------------------------------------------------------------------------------------------------------------------------------------------------------------------------------------------------------------------------------------------------------------------------------------------------------------------------------------------------------------------------------------------------|
| S4.20 | For which symptom(s) did (you / she) go? | 1. Convulsions..... <input type="checkbox"/><br>2. High blood pressure ..... <input type="checkbox"/><br>3. Severe anemia or (pallor <u>and</u> SOB) .. <input type="checkbox"/><br>4. – blank –<br>5. Severe headache ..... <input type="checkbox"/><br>6. Blurred vision..... <input type="checkbox"/><br>7. Too weak to get out of bed..... <input type="checkbox"/><br>8. Severe abdominal (not labor) pain .... <input type="checkbox"/><br>9. Fast or difficult breathing ..... <input type="checkbox"/> | 10. Puffy face..... <input type="checkbox"/><br>11. <u>Any</u> bleeding before labor ..... <input type="checkbox"/><br>12. Excess bleed during L or D..... <input type="checkbox"/><br>13. Fever..... <input type="checkbox"/><br>14. Smelly vaginal discharge ..... <input type="checkbox"/><br>15. Early/preterm labor (<9 mnth) . <input type="checkbox"/><br>16. Water broke ≥6 hrs bfr. labor .. <input type="checkbox"/><br>17. Labor for 12 hours or more ..... <input type="checkbox"/><br>18. Other (specified in SQ4.1)..... <input type="checkbox"/> |
|-------|------------------------------------------|----------------------------------------------------------------------------------------------------------------------------------------------------------------------------------------------------------------------------------------------------------------------------------------------------------------------------------------------------------------------------------------------------------------------------------------------------------------------------------------------------------------|-----------------------------------------------------------------------------------------------------------------------------------------------------------------------------------------------------------------------------------------------------------------------------------------------------------------------------------------------------------------------------------------------------------------------------------------------------------------------------------------------------------------------------------------------------------------|

|       |                                                                                                                                                                                                                                                                                                                  |                              |
|-------|------------------------------------------------------------------------------------------------------------------------------------------------------------------------------------------------------------------------------------------------------------------------------------------------------------------|------------------------------|
| S4.21 | How long after the labor or delivery symptom(s) began was it decided to go to the (first) health provider?<br><br><i>[Read "...to the first..." if she went or tried to go to more than one health provider.]</i><br><br><i>[Mark days, hours &amp;/or minutes as needed: e.g. 00 day, 02 hours, 10 minutes]</i> | ___ ___ Days<br>(DK = 99)    |
|       |                                                                                                                                                                                                                                                                                                                  | ___ ___ Hours<br>(DK = 99)   |
|       |                                                                                                                                                                                                                                                                                                                  | ___ ___ Minutes<br>(DK = 99) |

**Labor and delivery matrix instructions:** Ask the following questions for the first and last health providers where she sought/tried to seek care for the labor and delivery symptoms. If she delivered at a health provider/facility or at home or on route while trying to go to a health provider/facility, then that should be the first health provider (if she went to only one) or the last health provider. Ask all the questions for the first provider before going on to the last.

*Before asking about the first health provider, read:*  
 Now I would like to ask about (your / the mother's) visit to the (first) health provider. *[Read "first" if she went or tried to go to more than one provider.]*

*Before asking about the last health provider, read:*  
 Now I would like to ask about (your / the mother's) visit to the last health provider.

| – LABOR AND DELIVERY MATRIX QUESTIONS –                                                                                                                                                                                                                                                                                                                     |                                                                                                                                                                                                                                                                                                                               | FIRST HEALTH PROVIDER                                                                                      | LAST HEALTH PROVIDER                                                                                       |
|-------------------------------------------------------------------------------------------------------------------------------------------------------------------------------------------------------------------------------------------------------------------------------------------------------------------------------------------------------------|-------------------------------------------------------------------------------------------------------------------------------------------------------------------------------------------------------------------------------------------------------------------------------------------------------------------------------|------------------------------------------------------------------------------------------------------------|------------------------------------------------------------------------------------------------------------|
| What was the name of the (first / last) health provider or facility where (you / the mother) (sought care for the labor or delivery symptom(s) / delivered the baby / tried to deliver the baby)?<br><br><i>Probe to identify the type of provider.</i>                                                                                                     | 1. Hospital (Government)<br>2. Hospital (NGO)<br>3. Hospital (Private)<br>4. Health center (Government)<br>5. Health center (NGO)<br>6. Health post (Government)<br>7. Health post (NGO)<br>8. Private doctor/clinic (Formal)<br>9. Private doctor/clinic (?Formal?)<br>10. Trained community nurse/midwife<br>99. Don't know | S4.22<br><br><input type="checkbox"/> <input type="checkbox"/><br><br>_____<br>(Name of Provider/Facility) | S4.32<br><br><input type="checkbox"/> <input type="checkbox"/><br><br>_____<br>(Name of Provider/Facility) |
| After (deciding to seek care / being referred), how much time passed before going to the <FIRST/LAST HEALTH PROVIDER>?<br><br><i>[Discuss that this might include the time needed to arrange for transportation and money to go to the provider/facility, or to provide home care or go to a traditional provider before going to the health provider.]</i> |                                                                                                                                                                                                                                                                                                                               | S4.23<br><br>___ ___ Days<br>(DK = 99)<br><br>___ ___ Hours<br>(DK = 99)                                   | S4.33<br><br>___ ___ Days<br>(DK = 99)<br><br>___ ___ Hours<br>(DK = 99)                                   |

|                                                                                                                                                                                               |                                                                                                                                                                                                                                         |                                                                                                                                                                                                                                                                                                                                  |                                                                                                                                                                                                                                                                                                                                  |
|-----------------------------------------------------------------------------------------------------------------------------------------------------------------------------------------------|-----------------------------------------------------------------------------------------------------------------------------------------------------------------------------------------------------------------------------------------|----------------------------------------------------------------------------------------------------------------------------------------------------------------------------------------------------------------------------------------------------------------------------------------------------------------------------------|----------------------------------------------------------------------------------------------------------------------------------------------------------------------------------------------------------------------------------------------------------------------------------------------------------------------------------|
| <p><i>[If she delivered at home, record the time from decision/referral to delivery.]</i></p> <p><i>[Mark days, hours &amp;/or minutes as needed: e.g. 00 days, 02 hours, 10 minutes]</i></p> |                                                                                                                                                                                                                                         | <p>____ Minutes<br/>(DK = 99)</p>                                                                                                                                                                                                                                                                                                | <p>____ Minutes<br/>(DK = 99)</p>                                                                                                                                                                                                                                                                                                |
| <p>Was there any cost to travel to the &lt;FIRST/LAST HEALTH PROVIDER&gt; or pay for (your / the mother's) care there?</p>                                                                    | <p>1. Yes<br/>2. No<br/>9. Don't know</p>                                                                                                                                                                                               | <p>S4.24</p> <p><input type="checkbox"/> 2 or 9 → SQ4.25</p>                                                                                                                                                                                                                                                                     | <p>S4.34</p> <p><input type="checkbox"/> 2 or 9 → SQ4.35</p>                                                                                                                                                                                                                                                                     |
| <p>How did (you / the mother) arrange for the money for these expenses?<br/><i>[Multiple answers allowed.]</i></p>                                                                            | <p>1. Had available .....<br/>2. Borrowed.....<br/>3. Sold assets .....<br/>4. Help from kin/relatives.....<br/>5. Community fund.....<br/>6. Govt. scheme.....<br/>7. Other .....<br/>9. Don't know .....</p>                          | <p>S4.24.1</p> <p>1. <input type="checkbox"/><br/>2. <input type="checkbox"/><br/>3. <input type="checkbox"/><br/>4. <input type="checkbox"/><br/>5. <input type="checkbox"/><br/>6. <input type="checkbox"/><br/>7. <input type="checkbox"/><br/>9. <input type="checkbox"/></p>                                                | <p>S4.34.1</p> <p>1. <input type="checkbox"/><br/>2. <input type="checkbox"/><br/>3. <input type="checkbox"/><br/>4. <input type="checkbox"/><br/>5. <input type="checkbox"/><br/>6. <input type="checkbox"/><br/>7. <input type="checkbox"/><br/>9. <input type="checkbox"/></p>                                                |
| <p>What transportation method was used to go there?<br/><i>[Multiple answers allowed.]</i></p>                                                                                                | <p>1. Walk.....<br/>2. Bicycle/animal/cart/boat .....<br/>3. Bus.....<br/>4. Taxi/auto/trecker/motorcycle .....<br/>5. Ambulance .....<br/>6. Other .....<br/>7. Could not arrange transport .....<br/>9. Don't know .....</p>          | <p>S4.25</p> <p>1. <input type="checkbox"/> <b><i>If only walk</i></b><br/>2. <input type="checkbox"/> → SQ4.26.1<br/>3. <input type="checkbox"/><br/>4. <input type="checkbox"/><br/>5. <input type="checkbox"/><br/>6. <input type="checkbox"/><br/>7. <input type="checkbox"/> → SQ4.26.1<br/>9. <input type="checkbox"/></p> | <p>S4.35</p> <p>1. <input type="checkbox"/> <b><i>If only walk</i></b><br/>2. <input type="checkbox"/> → SQ4.36.1<br/>3. <input type="checkbox"/><br/>4. <input type="checkbox"/><br/>5. <input type="checkbox"/><br/>6. <input type="checkbox"/><br/>7. <input type="checkbox"/> → SQ4.36.1<br/>9. <input type="checkbox"/></p> |
| <p>How much did the transportation cost?</p>                                                                                                                                                  |                                                                                                                                                                                                                                         | <p>S4.26</p> <p>____ unit<br/>(DK = 9999)</p>                                                                                                                                                                                                                                                                                    | <p>S4.36</p> <p>____ unit<br/>(DK = 9999)</p>                                                                                                                                                                                                                                                                                    |
| <p>Did (you / the mother) reach the &lt;FIRST/LAST HEALTH PROVIDER&gt; before delivering the baby?<br/><i>If "No," discuss with respondent to reach correct response: 2, 3 or 4.]</i></p>     | <p>1. Yes, reached before delivering<br/>2. No, delivered before setting out<br/>3. No, delivered on route to provider<br/>4. No, could not reach this provider – did not set out/returned home/took other action<br/>9. Don't know</p> | <p>S4.26.1</p> <p><input type="checkbox"/> 2, 3 → Inst_8<br/>4, 9 → Inst_7</p>                                                                                                                                                                                                                                                   | <p>S4.36.1</p> <p><input type="checkbox"/> 2-9 → Inst_8</p>                                                                                                                                                                                                                                                                      |
| <p>How long did it take to travel to the &lt;FIRST/LAST HEALTH PROVIDER&gt;?<br/><i>[Mark hours &amp;/or minutes as needed: e.g. 05 hours, 30 minutes]</i></p>                                |                                                                                                                                                                                                                                         | <p>S4.27</p> <p>____ Hours<br/>(DK = 99)</p> <p>____ Minutes<br/>(DK = 99)</p>                                                                                                                                                                                                                                                   | <p>S4.37</p> <p>____ Hours<br/>(DK = 99)</p> <p>____ Minutes<br/>(DK = 99)</p>                                                                                                                                                                                                                                                   |

Study ID#

|                 |  |  |    |  |       |  |  |  |
|-----------------|--|--|----|--|-------|--|--|--|
|                 |  |  |    |  |       |  |  |  |
| Village/Cluster |  |  | HH |  | Child |  |  |  |

**CHILD HEALTH EPIDEMIOLOGY REFERENCE GROUP  
SB/NN/CHILD VERBAL/SOCIAL AUTOPSY QUESTIONNAIRE**

|                                                                                                                                                                                                                                                                                                                            |                                                                                                                                                                                                                                                                                                                                                                                                                                                                                                                                                                                                                                                                                                                                                                                                                                                                                                                                                                      |                                                                                                                                                                                                                                                                                                                                                                                                                                                                                                                                                                                                                                                                                                                                                                                                                                                                                                                            |                                                                                                                                                                                                                                                                                                                                                                                                                                                                                                                                                                                                                                                                                                                                                                                                                                                                                                                            |
|----------------------------------------------------------------------------------------------------------------------------------------------------------------------------------------------------------------------------------------------------------------------------------------------------------------------------|----------------------------------------------------------------------------------------------------------------------------------------------------------------------------------------------------------------------------------------------------------------------------------------------------------------------------------------------------------------------------------------------------------------------------------------------------------------------------------------------------------------------------------------------------------------------------------------------------------------------------------------------------------------------------------------------------------------------------------------------------------------------------------------------------------------------------------------------------------------------------------------------------------------------------------------------------------------------|----------------------------------------------------------------------------------------------------------------------------------------------------------------------------------------------------------------------------------------------------------------------------------------------------------------------------------------------------------------------------------------------------------------------------------------------------------------------------------------------------------------------------------------------------------------------------------------------------------------------------------------------------------------------------------------------------------------------------------------------------------------------------------------------------------------------------------------------------------------------------------------------------------------------------|----------------------------------------------------------------------------------------------------------------------------------------------------------------------------------------------------------------------------------------------------------------------------------------------------------------------------------------------------------------------------------------------------------------------------------------------------------------------------------------------------------------------------------------------------------------------------------------------------------------------------------------------------------------------------------------------------------------------------------------------------------------------------------------------------------------------------------------------------------------------------------------------------------------------------|
| <p>What did the &lt;FIRST/LAST HEALTH PROVIDER&gt; do for (your / the mother's) (labor or delivery symptom(s) / delivery)?</p> <p><i>Prompt: Was there anything else?</i></p> <p><i>[Multiple answers allowed.]</i></p>                                                                                                    | <ol style="list-style-type: none"> <li>1. Gave oxygen for the baby .....</li> <li>2. Gave antibiotics by mouth.....</li> <li>3. Gave antimalarial by mouth .....</li> <li>4. Gave BP medicine by mouth.....</li> <li>5. Other medicine by mouth (<i>specify</i>)</li> <li>6. Gave medicine to stop bleeding....</li> <li>7. Gave medicine to stop convulsions</li> <li>8. Gave medicine to strengthen labor</li> <li>9. Gave medicine to stop labor .....</li> <li>10. Gave medicine for baby's lungs ....</li> <li>11. Gave IM medicine .....</li> <li>12. Gave IV fluids or medicine .....</li> <li>13. Blood transfusion .....</li> <li>14. Advised to buy outside medicine...</li> <li>15. Uterine massage.....</li> <li>16. Did a C-section .....</li> <li>17. Did another operation (<i>specify</i>) .....</li> <li>18. Admitted to hospital.....</li> <li>19. Other (<i>specify</i>) .....</li> <li>20. Nothing.....</li> <li>99. Don't know .....</li> </ol> | <p>S4.28</p> <ol style="list-style-type: none"> <li>1. <input type="checkbox"/></li> <li>2. <input type="checkbox"/></li> <li>3. <input type="checkbox"/></li> <li>4. <input type="checkbox"/></li> <li>5. <input type="checkbox"/></li> <li>6. <input type="checkbox"/></li> <li>7. <input type="checkbox"/></li> <li>8. <input type="checkbox"/></li> <li>9. <input type="checkbox"/></li> <li>10. <input type="checkbox"/></li> <li>11. <input type="checkbox"/></li> <li>12. <input type="checkbox"/></li> <li>13. <input type="checkbox"/></li> <li>14. <input type="checkbox"/></li> <li>15. <input type="checkbox"/></li> <li>16. <input type="checkbox"/></li> <li>17. <input type="checkbox"/></li> <li>18. <input type="checkbox"/> stayed ___ days</li> <li>19. <input type="checkbox"/></li> <li>20. <input type="checkbox"/> → <b>SQ4.30</b></li> <li>99. <input type="checkbox"/> → <b>SQ4.30</b></li> </ol> | <p>S4.38</p> <ol style="list-style-type: none"> <li>1. <input type="checkbox"/></li> <li>2. <input type="checkbox"/></li> <li>3. <input type="checkbox"/></li> <li>4. <input type="checkbox"/></li> <li>5. <input type="checkbox"/></li> <li>6. <input type="checkbox"/></li> <li>7. <input type="checkbox"/></li> <li>8. <input type="checkbox"/></li> <li>9. <input type="checkbox"/></li> <li>10. <input type="checkbox"/></li> <li>11. <input type="checkbox"/></li> <li>12. <input type="checkbox"/></li> <li>13. <input type="checkbox"/></li> <li>14. <input type="checkbox"/></li> <li>15. <input type="checkbox"/></li> <li>16. <input type="checkbox"/></li> <li>17. <input type="checkbox"/></li> <li>18. <input type="checkbox"/> stayed ___ days</li> <li>19. <input type="checkbox"/></li> <li>20. <input type="checkbox"/> → <b>SQ4.40</b></li> <li>99. <input type="checkbox"/> → <b>SQ4.40</b></li> </ol> |
| <p>How much did (you / the mother) pay for these treatments and other costs related to the health care, including any admission fee, consultation, lab tests, equipment, and room and food for companions?</p>                                                                                                             | <p>S4.29</p> <p>_____ unit<br/>(DK = 99999)</p>                                                                                                                                                                                                                                                                                                                                                                                                                                                                                                                                                                                                                                                                                                                                                                                                                                                                                                                      | <p>S4.39</p> <p>_____ unit<br/>(DK = 99999)</p>                                                                                                                                                                                                                                                                                                                                                                                                                                                                                                                                                                                                                                                                                                                                                                                                                                                                            | <p>S4.39</p> <p>_____ unit<br/>(DK = 99999)</p>                                                                                                                                                                                                                                                                                                                                                                                                                                                                                                                                                                                                                                                                                                                                                                                                                                                                            |
| <p>Did the &lt;FIRST/LAST HEALTH PROVIDER&gt; refer (you / the mother) to another health provider or facility?</p>                                                                                                                                                                                                         | <ol style="list-style-type: none"> <li>1. Yes</li> <li>2. No</li> <li>9. Don't know</li> </ol>                                                                                                                                                                                                                                                                                                                                                                                                                                                                                                                                                                                                                                                                                                                                                                                                                                                                       | <p>S4.30</p> <p><input type="checkbox"/> 2 or 9 → <b>SQ4.30.2</b></p>                                                                                                                                                                                                                                                                                                                                                                                                                                                                                                                                                                                                                                                                                                                                                                                                                                                      | <p>4.40</p> <p><input type="checkbox"/> 2 or 9 → <b>SQ4.40.2</b></p>                                                                                                                                                                                                                                                                                                                                                                                                                                                                                                                                                                                                                                                                                                                                                                                                                                                       |
| <p>Why (were you / was the mother) referred?</p> <p><i>[Multiple answers allowed.]</i></p>                                                                                                                                                                                                                                 | <ol style="list-style-type: none"> <li>1. The provider was not capable of managing the problem.....</li> <li>2. Required supplies (e.g., drugs, IV, oxygen, blood) not available.....</li> <li>3. Required equipment (e.g., ultrasound) not available .....</li> <li>4. Required facility (e.g., operation room) not available.....</li> <li>9. Don't know .....</li> </ol>                                                                                                                                                                                                                                                                                                                                                                                                                                                                                                                                                                                          | <p>S4.30.1</p> <ol style="list-style-type: none"> <li>1. <input type="checkbox"/></li> <li>2. <input type="checkbox"/></li> <li>3. <input type="checkbox"/></li> <li>4. <input type="checkbox"/></li> <li>9. <input type="checkbox"/></li> </ol>                                                                                                                                                                                                                                                                                                                                                                                                                                                                                                                                                                                                                                                                           | <p>S4.40.1</p> <ol style="list-style-type: none"> <li>1. <input type="checkbox"/></li> <li>2. <input type="checkbox"/></li> <li>3. <input type="checkbox"/></li> <li>4. <input type="checkbox"/></li> <li>9. <input type="checkbox"/></li> </ol>                                                                                                                                                                                                                                                                                                                                                                                                                                                                                                                                                                                                                                                                           |
| <p>Was the baby delivered at the &lt;FIRST/LAST HEALTH PROVIDER&gt;?</p>                                                                                                                                                                                                                                                   | <ol style="list-style-type: none"> <li>1. Yes</li> <li>2. No</li> <li>9. Don't know</li> </ol>                                                                                                                                                                                                                                                                                                                                                                                                                                                                                                                                                                                                                                                                                                                                                                                                                                                                       | <p>S4.30.2</p> <p><input type="checkbox"/> 1 → <b>Inst_8</b></p>                                                                                                                                                                                                                                                                                                                                                                                                                                                                                                                                                                                                                                                                                                                                                                                                                                                           | <p>S4.40.2</p> <p><input type="checkbox"/> 1 → <b>Inst_8</b></p>                                                                                                                                                                                                                                                                                                                                                                                                                                                                                                                                                                                                                                                                                                                                                                                                                                                           |
| <b>Inst_6: Check SQ4.18 to determine if she went to another health provider</b>                                                                                                                                                                                                                                            |                                                                                                                                                                                                                                                                                                                                                                                                                                                                                                                                                                                                                                                                                                                                                                                                                                                                                                                                                                      |                                                                                                                                                                                                                                                                                                                                                                                                                                                                                                                                                                                                                                                                                                                                                                                                                                                                                                                            |                                                                                                                                                                                                                                                                                                                                                                                                                                                                                                                                                                                                                                                                                                                                                                                                                                                                                                                            |
| <p><i>If did not go to another health provider, ask: Did (you / the mother) have any concerns or problems that kept (you / her) from going to another provider?</i></p> <p><i>If went to another health provider, ask: Did (you / the mother) have to overcome any concerns or problems to go to another provider?</i></p> | <ol style="list-style-type: none"> <li>1. Yes</li> <li>2. No</li> <li>9. Don't know</li> </ol>                                                                                                                                                                                                                                                                                                                                                                                                                                                                                                                                                                                                                                                                                                                                                                                                                                                                       | <p>S4.31</p> <p><input type="checkbox"/> 2 or 9 → <b>Inst_7</b></p>                                                                                                                                                                                                                                                                                                                                                                                                                                                                                                                                                                                                                                                                                                                                                                                                                                                        | <p>S4.41</p> <p><input type="checkbox"/> 2 or 9 → <b>Inst_8</b></p>                                                                                                                                                                                                                                                                                                                                                                                                                                                                                                                                                                                                                                                                                                                                                                                                                                                        |

Study ID# 

|  |  |  |  |
|--|--|--|--|
|  |  |  |  |
|--|--|--|--|

|  |  |  |
|--|--|--|
|  |  |  |
|--|--|--|

|  |  |
|--|--|
|  |  |
|--|--|

  
Village/Cluster HH Child

**CHILD HEALTH EPIDEMIOLOGY REFERENCE GROUP  
SB/NN/CHILD VERBAL/SOCIAL AUTOPSY QUESTIONNAIRE**

|                                                                                                                                                 |                                                                                                                                                                                                                                                                                                                                                                                                                                                                                                                                                                                                                                                                     |                                                                                                                                                                                                                                                                                                                                                                                                                                                                                                                                                                                                  |                                                                                                                                                                                                                                                                                                                                                                                                                                                                                                                                                                                  |
|-------------------------------------------------------------------------------------------------------------------------------------------------|---------------------------------------------------------------------------------------------------------------------------------------------------------------------------------------------------------------------------------------------------------------------------------------------------------------------------------------------------------------------------------------------------------------------------------------------------------------------------------------------------------------------------------------------------------------------------------------------------------------------------------------------------------------------|--------------------------------------------------------------------------------------------------------------------------------------------------------------------------------------------------------------------------------------------------------------------------------------------------------------------------------------------------------------------------------------------------------------------------------------------------------------------------------------------------------------------------------------------------------------------------------------------------|----------------------------------------------------------------------------------------------------------------------------------------------------------------------------------------------------------------------------------------------------------------------------------------------------------------------------------------------------------------------------------------------------------------------------------------------------------------------------------------------------------------------------------------------------------------------------------|
| <p>What concerns or problems did (you / she) have?</p> <p><i>Prompt: Was there anything else?</i></p> <p><i>[Multiple answers allowed.]</i></p> | <p>1. Thought no more care needed.....</p> <p>2. No one available to go with her.....</p> <p>3. Too much time from regular duties.</p> <p>4. Someone else (<i>specify</i>) decided ....</p> <p>5. Too far to travel.....</p> <p>6. No transportation available.....</p> <p>7. Cost (transport, health care, other)</p> <p>8. Not satisfied with available care .....</p> <p>9. Problem required traditional care ...</p> <p>10. Thought too sick to travel.....</p> <p>11. Thought she/baby will die anyway</p> <p>12. Was late at night.....</p> <p>13. She delivered before going.....</p><br><p>14. Other (<i>specify</i>) .....</p> <p>99. Don't know .....</p> | <p>S4.31.1</p> <p>1. <input type="checkbox"/></p> <p>2. <input type="checkbox"/></p> <p>3. <input type="checkbox"/></p> <p>4. <input type="checkbox"/> _____</p> <p>5. <input type="checkbox"/></p> <p>6. <input type="checkbox"/></p> <p>7. <input type="checkbox"/></p> <p>8. <input type="checkbox"/></p> <p>9. <input type="checkbox"/></p> <p>10. <input type="checkbox"/></p> <p>11. <input type="checkbox"/></p> <p>12. <input type="checkbox"/></p> <p>13. <input type="checkbox"/> → <i>Inst_8</i></p><br><p>14. <input type="checkbox"/> _____</p> <p>99. <input type="checkbox"/></p> | <p>S4.41.1</p> <p>1. <input type="checkbox"/></p> <p>2. <input type="checkbox"/></p> <p>3. <input type="checkbox"/></p> <p>4. <input type="checkbox"/> _____</p> <p>5. <input type="checkbox"/></p> <p>6. <input type="checkbox"/></p> <p>7. <input type="checkbox"/></p> <p>8. <input type="checkbox"/></p> <p>9. <input type="checkbox"/></p> <p>10. <input type="checkbox"/></p> <p>11. <input type="checkbox"/></p> <p>12. <input type="checkbox"/></p> <p>13. <input type="checkbox"/></p><br><p>14. <input type="checkbox"/> _____</p> <p>99. <input type="checkbox"/></p> |
| <b><i>Inst_7: Check SQ4.18 → If she went to another health provider</i></b>                                                                     |                                                                                                                                                                                                                                                                                                                                                                                                                                                                                                                                                                                                                                                                     | <b><i>...go to SQ4.32 (LAST HEALTH PROVIDER)</i></b>                                                                                                                                                                                                                                                                                                                                                                                                                                                                                                                                             |                                                                                                                                                                                                                                                                                                                                                                                                                                                                                                                                                                                  |
| <b><i>Inst_8: STOP – If VQ1.15 = 1 (Stillbirth) → VQ5.4 (Section 5: Health records)</i></b>                                                     |                                                                                                                                                                                                                                                                                                                                                                                                                                                                                                                                                                                                                                                                     |                                                                                                                                                                                                                                                                                                                                                                                                                                                                                                                                                                                                  |                                                                                                                                                                                                                                                                                                                                                                                                                                                                                                                                                                                  |

**SA Module 5a: Care of the newborn; and VA Section 3: Neonatal deaths (FOR NN DEATHS <28 DAYS OLD)**

Read: Now I would like to ask you about the care of the newborn child.

|                             |                                                                                                                                                  |                                                                                                                                                                                                                                                                                       |                                                                                                                                                                                                                                                                                                                                                                                                                                                                                                                                                                                                                                                                                                                                                                           |     |    |                             |                             |                             |                             |                             |                             |                             |                             |
|-----------------------------|--------------------------------------------------------------------------------------------------------------------------------------------------|---------------------------------------------------------------------------------------------------------------------------------------------------------------------------------------------------------------------------------------------------------------------------------------|---------------------------------------------------------------------------------------------------------------------------------------------------------------------------------------------------------------------------------------------------------------------------------------------------------------------------------------------------------------------------------------------------------------------------------------------------------------------------------------------------------------------------------------------------------------------------------------------------------------------------------------------------------------------------------------------------------------------------------------------------------------------------|-----|----|-----------------------------|-----------------------------|-----------------------------|-----------------------------|-----------------------------|-----------------------------|-----------------------------|-----------------------------|
| S5a.1                       | What tool was used for cutting the cord?                                                                                                         | 1. New/from delivery kit/boiled razor blade<br>2. Old razor blade<br>3. Scissors<br>4. Other ( <i>specify</i> ).....<br>9. Don't know                                                                                                                                                 | <input type="checkbox"/>                                                                                                                                                                                                                                                                                                                                                                                                                                                                                                                                                                                                                                                                                                                                                  |     |    |                             |                             |                             |                             |                             |                             |                             |                             |
| S5a.2                       | What material was used for tying the cord?                                                                                                       | 1. Clean/from delivery kit/boiled piece of thread<br>2. Unclean piece of thread<br>3. Cord clamp<br>4. Other ( <i>specify</i> ).....<br>9. Don't know                                                                                                                                 | <input type="checkbox"/>                                                                                                                                                                                                                                                                                                                                                                                                                                                                                                                                                                                                                                                                                                                                                  |     |    |                             |                             |                             |                             |                             |                             |                             |                             |
| S5a.3                       | Was anything applied to the umbilical cord stump after birth?                                                                                    | 1. Yes<br>2. No<br>9. Don't know                                                                                                                                                                                                                                                      | <input type="checkbox"/> 2 or 9 → VQ3.1                                                                                                                                                                                                                                                                                                                                                                                                                                                                                                                                                                                                                                                                                                                                   |     |    |                             |                             |                             |                             |                             |                             |                             |                             |
| S5a.3.1                     | What was it?                                                                                                                                     | 1. Alcohol/other antiseptic<br>2. Antibiotic ointment/cream/powder<br>3. Castor oil, mustard oil or shea butter<br>4. Animal dung or dirt/mud<br>5. Other ( <i>specify</i> ).....<br>9. Don't know                                                                                    | <input type="checkbox"/>                                                                                                                                                                                                                                                                                                                                                                                                                                                                                                                                                                                                                                                                                                                                                  |     |    |                             |                             |                             |                             |                             |                             |                             |                             |
| V3.1                        | Were there any bruises or signs of injury on the baby's body at birth?                                                                           | 1. Yes<br>2. No<br>9. Don't know                                                                                                                                                                                                                                                      | <input type="checkbox"/>                                                                                                                                                                                                                                                                                                                                                                                                                                                                                                                                                                                                                                                                                                                                                  |     |    |                             |                             |                             |                             |                             |                             |                             |                             |
| V3.2                        | Was any part of the baby physically abnormal at the time of delivery? (for example: body part too large or too small, additional growth on body) | 1. Yes<br>2. No<br>9. Don't know                                                                                                                                                                                                                                                      | <input type="checkbox"/> 2 or 9 → VQ3.4                                                                                                                                                                                                                                                                                                                                                                                                                                                                                                                                                                                                                                                                                                                                   |     |    |                             |                             |                             |                             |                             |                             |                             |                             |
| V3.3                        | What were the abnormalities?<br><br><i>Ask for the following abnormalities:<br/>         [Mark all that apply – Show photos]</i>                 | 1. Was the head size very small at the time of birth? .....<br>2. Was the head size very large at the time of birth? .....<br>3. Was there a mass defect on the back of head or spine?.....<br>4. Was there any other abnormality? .....<br><br><i>(If "Yes," then specify) .....</i> | <table style="width: 100%; border: none;"> <tr> <td style="text-align: right; padding-right: 5px;">Yes</td> <td style="text-align: right; padding-right: 5px;">No</td> </tr> <tr> <td style="padding-right: 5px;">1. <input type="checkbox"/></td> <td style="padding-right: 5px;">2. <input type="checkbox"/></td> </tr> <tr> <td style="padding-right: 5px;">1. <input type="checkbox"/></td> <td style="padding-right: 5px;">2. <input type="checkbox"/></td> </tr> <tr> <td style="padding-right: 5px;">1. <input type="checkbox"/></td> <td style="padding-right: 5px;">2. <input type="checkbox"/></td> </tr> <tr> <td style="padding-right: 5px;">1. <input type="checkbox"/></td> <td style="padding-right: 5px;">2. <input type="checkbox"/></td> </tr> </table> | Yes | No | 1. <input type="checkbox"/> | 2. <input type="checkbox"/> | 1. <input type="checkbox"/> | 2. <input type="checkbox"/> | 1. <input type="checkbox"/> | 2. <input type="checkbox"/> | 1. <input type="checkbox"/> | 2. <input type="checkbox"/> |
| Yes                         | No                                                                                                                                               |                                                                                                                                                                                                                                                                                       |                                                                                                                                                                                                                                                                                                                                                                                                                                                                                                                                                                                                                                                                                                                                                                           |     |    |                             |                             |                             |                             |                             |                             |                             |                             |
| 1. <input type="checkbox"/> | 2. <input type="checkbox"/>                                                                                                                      |                                                                                                                                                                                                                                                                                       |                                                                                                                                                                                                                                                                                                                                                                                                                                                                                                                                                                                                                                                                                                                                                                           |     |    |                             |                             |                             |                             |                             |                             |                             |                             |
| 1. <input type="checkbox"/> | 2. <input type="checkbox"/>                                                                                                                      |                                                                                                                                                                                                                                                                                       |                                                                                                                                                                                                                                                                                                                                                                                                                                                                                                                                                                                                                                                                                                                                                                           |     |    |                             |                             |                             |                             |                             |                             |                             |                             |
| 1. <input type="checkbox"/> | 2. <input type="checkbox"/>                                                                                                                      |                                                                                                                                                                                                                                                                                       |                                                                                                                                                                                                                                                                                                                                                                                                                                                                                                                                                                                                                                                                                                                                                                           |     |    |                             |                             |                             |                             |                             |                             |                             |                             |
| 1. <input type="checkbox"/> | 2. <input type="checkbox"/>                                                                                                                      |                                                                                                                                                                                                                                                                                       |                                                                                                                                                                                                                                                                                                                                                                                                                                                                                                                                                                                                                                                                                                                                                                           |     |    |                             |                             |                             |                             |                             |                             |                             |                             |
| V3.4                        | Did the baby breathe immediately after birth?                                                                                                    | 1. Yes<br>2. No<br>9. Don't know                                                                                                                                                                                                                                                      | <input type="checkbox"/> 2 → VQ3.6                                                                                                                                                                                                                                                                                                                                                                                                                                                                                                                                                                                                                                                                                                                                        |     |    |                             |                             |                             |                             |                             |                             |                             |                             |
| V3.5                        | Did the baby have difficulty breathing?                                                                                                          | 1. Yes<br>2. No<br>9. Don't know                                                                                                                                                                                                                                                      | <input type="checkbox"/>                                                                                                                                                                                                                                                                                                                                                                                                                                                                                                                                                                                                                                                                                                                                                  |     |    |                             |                             |                             |                             |                             |                             |                             |                             |
| V3.6                        | Was anything done to try to help the baby breathe at birth?                                                                                      | 1. Yes<br>2. No<br>9. Don't know                                                                                                                                                                                                                                                      | <input type="checkbox"/>                                                                                                                                                                                                                                                                                                                                                                                                                                                                                                                                                                                                                                                                                                                                                  |     |    |                             |                             |                             |                             |                             |                             |                             |                             |
| V3.7                        | Did the baby cry immediately after birth?                                                                                                        | 1. Yes<br>2. No<br>9. Don't know                                                                                                                                                                                                                                                      | <input type="checkbox"/> 1 → VQ3.9                                                                                                                                                                                                                                                                                                                                                                                                                                                                                                                                                                                                                                                                                                                                        |     |    |                             |                             |                             |                             |                             |                             |                             |                             |
| V3.8                        | How long after birth did the baby first cry?<br><br><i>[Mark ONE response]</i>                                                                   | 1. Within 5 minutes<br>2. Within 6-30 minutes<br>3. More than 30 minutes<br>4. Never<br>9. Don't know                                                                                                                                                                                 | <input type="checkbox"/> 4 → SQ5a.4                                                                                                                                                                                                                                                                                                                                                                                                                                                                                                                                                                                                                                                                                                                                       |     |    |                             |                             |                             |                             |                             |                             |                             |                             |
| V3.9                        | Did the baby stop being able to cry?                                                                                                             | 1. Yes<br>2. No<br>9. Don't know                                                                                                                                                                                                                                                      | <input type="checkbox"/> 2 or 9 → SQ5a.4                                                                                                                                                                                                                                                                                                                                                                                                                                                                                                                                                                                                                                                                                                                                  |     |    |                             |                             |                             |                             |                             |                             |                             |                             |

Study ID#

|                 |  |  |  |    |  |  |       |  |  |
|-----------------|--|--|--|----|--|--|-------|--|--|
|                 |  |  |  |    |  |  |       |  |  |
| Village/Cluster |  |  |  | HH |  |  | Child |  |  |

**CHILD HEALTH EPIDEMIOLOGY REFERENCE GROUP  
SB/NN/CHILD VERBAL/SOCIAL AUTOPSY QUESTIONNAIRE**

|                                 |                                                                                                                                                                                                                                                                                         |                                                                                                                                                                                                                                                                                                                     |                                                                                                                                                                                                                                                                                                                                                                                                                                                                                                                                                                                                                                                                                                                                                                                                                                                                                                                                                                                                                                                                                                                                                                                                                                                                                                                                                                                                                                                                                                                                                                                                                                                                                                                                                                                                                                                                                                                                                                                                                                                                                                                                                                                                                                                                                                                                                                                                                                                                                                                     |                             |                             |                            |  |  |  |  |                        |                      |                     |                       |                   |                                 |                             |                             |                             |                             |                             |                                 |                             |                             |                             |                             |                             |                                 |                             |                             |                             |                             |                             |                                 |                             |                             |                             |                             |                             |                                 |                             |                             |                             |                             |                             |
|---------------------------------|-----------------------------------------------------------------------------------------------------------------------------------------------------------------------------------------------------------------------------------------------------------------------------------------|---------------------------------------------------------------------------------------------------------------------------------------------------------------------------------------------------------------------------------------------------------------------------------------------------------------------|---------------------------------------------------------------------------------------------------------------------------------------------------------------------------------------------------------------------------------------------------------------------------------------------------------------------------------------------------------------------------------------------------------------------------------------------------------------------------------------------------------------------------------------------------------------------------------------------------------------------------------------------------------------------------------------------------------------------------------------------------------------------------------------------------------------------------------------------------------------------------------------------------------------------------------------------------------------------------------------------------------------------------------------------------------------------------------------------------------------------------------------------------------------------------------------------------------------------------------------------------------------------------------------------------------------------------------------------------------------------------------------------------------------------------------------------------------------------------------------------------------------------------------------------------------------------------------------------------------------------------------------------------------------------------------------------------------------------------------------------------------------------------------------------------------------------------------------------------------------------------------------------------------------------------------------------------------------------------------------------------------------------------------------------------------------------------------------------------------------------------------------------------------------------------------------------------------------------------------------------------------------------------------------------------------------------------------------------------------------------------------------------------------------------------------------------------------------------------------------------------------------------|-----------------------------|-----------------------------|----------------------------|--|--|--|--|------------------------|----------------------|---------------------|-----------------------|-------------------|---------------------------------|-----------------------------|-----------------------------|-----------------------------|-----------------------------|-----------------------------|---------------------------------|-----------------------------|-----------------------------|-----------------------------|-----------------------------|-----------------------------|---------------------------------|-----------------------------|-----------------------------|-----------------------------|-----------------------------|-----------------------------|---------------------------------|-----------------------------|-----------------------------|-----------------------------|-----------------------------|-----------------------------|---------------------------------|-----------------------------|-----------------------------|-----------------------------|-----------------------------|-----------------------------|
| V3.10                           | How long before the baby died did the baby stop crying?                                                                                                                                                                                                                                 | 1. Less than one day<br>2. One day or more<br>9. Don't know                                                                                                                                                                                                                                                         | <input type="checkbox"/>                                                                                                                                                                                                                                                                                                                                                                                                                                                                                                                                                                                                                                                                                                                                                                                                                                                                                                                                                                                                                                                                                                                                                                                                                                                                                                                                                                                                                                                                                                                                                                                                                                                                                                                                                                                                                                                                                                                                                                                                                                                                                                                                                                                                                                                                                                                                                                                                                                                                                            |                             |                             |                            |  |  |  |  |                        |                      |                     |                       |                   |                                 |                             |                             |                             |                             |                             |                                 |                             |                             |                             |                             |                             |                                 |                             |                             |                             |                             |                             |                                 |                             |                             |                             |                             |                             |                                 |                             |                             |                             |                             |                             |
| S5a.4                           | How long after birth was the baby first bathed?                                                                                                                                                                                                                                         | 1. Less than 1 hour<br>2. 1-23 hours<br>3. 24-72 hours (1-3 days)<br>4. More than 72 hours (3 days)<br>5. Not bathed<br>9. Don't know                                                                                                                                                                               | <input type="checkbox"/>                                                                                                                                                                                                                                                                                                                                                                                                                                                                                                                                                                                                                                                                                                                                                                                                                                                                                                                                                                                                                                                                                                                                                                                                                                                                                                                                                                                                                                                                                                                                                                                                                                                                                                                                                                                                                                                                                                                                                                                                                                                                                                                                                                                                                                                                                                                                                                                                                                                                                            |                             |                             |                            |  |  |  |  |                        |                      |                     |                       |                   |                                 |                             |                             |                             |                             |                             |                                 |                             |                             |                             |                             |                             |                                 |                             |                             |                             |                             |                             |                                 |                             |                             |                             |                             |                             |                                 |                             |                             |                             |                             |                             |
| S5a.5                           | Was anything done to keep the baby warm on the first day after birth?                                                                                                                                                                                                                   | 1. Yes<br>2. No<br>9. Don't know                                                                                                                                                                                                                                                                                    | <input type="checkbox"/> <b>2 or 9 → SQ5a.6</b>                                                                                                                                                                                                                                                                                                                                                                                                                                                                                                                                                                                                                                                                                                                                                                                                                                                                                                                                                                                                                                                                                                                                                                                                                                                                                                                                                                                                                                                                                                                                                                                                                                                                                                                                                                                                                                                                                                                                                                                                                                                                                                                                                                                                                                                                                                                                                                                                                                                                     |                             |                             |                            |  |  |  |  |                        |                      |                     |                       |                   |                                 |                             |                             |                             |                             |                             |                                 |                             |                             |                             |                             |                             |                                 |                             |                             |                             |                             |                             |                                 |                             |                             |                             |                             |                             |                                 |                             |                             |                             |                             |                             |
| S5a.5.<br>1                     | What was done?<br><i>[Multiple answers allowed.]</i><br><br>For each mentioned, ask:<br>How soon after birth was this done?                                                                                                                                                             | 1. Dried/wiped .....<br>2. Wrapped in a blanket .....<br>3. Skin-to-skin contact .....<br>4. Incubator .....<br>5. Other .....<br><br>(specify other) .....                                                                                                                                                         | <table border="1" style="width: 100%; border-collapse: collapse;"> <tr> <td style="width: 15%; text-align: center;"><u>Done</u></td> <td colspan="5" style="text-align: center;"><u>How soon after birth</u></td> </tr> <tr> <td></td> <td style="text-align: center;"><small>&lt;1hr</small></td> <td style="text-align: center;"><small>&lt;6</small></td> <td style="text-align: center;"><small>6-24</small></td> <td style="text-align: center;"><small>&gt;24</small></td> <td style="text-align: center;"><small>DK</small></td> </tr> <tr> <td>1. <input type="checkbox"/> ...</td> <td style="text-align: center;">1. <input type="checkbox"/></td> <td style="text-align: center;">2. <input type="checkbox"/></td> <td style="text-align: center;">3. <input type="checkbox"/></td> <td style="text-align: center;">4. <input type="checkbox"/></td> <td style="text-align: center;">9. <input type="checkbox"/></td> </tr> <tr> <td>2. <input type="checkbox"/> ...</td> <td style="text-align: center;">1. <input type="checkbox"/></td> <td style="text-align: center;">2. <input type="checkbox"/></td> <td style="text-align: center;">3. <input type="checkbox"/></td> <td style="text-align: center;">4. <input type="checkbox"/></td> <td style="text-align: center;">8. <input type="checkbox"/></td> </tr> <tr> <td>3. <input type="checkbox"/> ...</td> <td style="text-align: center;">1. <input type="checkbox"/></td> <td style="text-align: center;">2. <input type="checkbox"/></td> <td style="text-align: center;">3. <input type="checkbox"/></td> <td style="text-align: center;">4. <input type="checkbox"/></td> <td style="text-align: center;">9. <input type="checkbox"/></td> </tr> <tr> <td>4. <input type="checkbox"/> ...</td> <td style="text-align: center;">1. <input type="checkbox"/></td> <td style="text-align: center;">2. <input type="checkbox"/></td> <td style="text-align: center;">3. <input type="checkbox"/></td> <td style="text-align: center;">4. <input type="checkbox"/></td> <td style="text-align: center;">9. <input type="checkbox"/></td> </tr> <tr> <td>5. <input type="checkbox"/> ...</td> <td style="text-align: center;">1. <input type="checkbox"/></td> <td style="text-align: center;">2. <input type="checkbox"/></td> <td style="text-align: center;">3. <input type="checkbox"/></td> <td style="text-align: center;">4. <input type="checkbox"/></td> <td style="text-align: center;">9. <input type="checkbox"/></td> </tr> </table> | <u>Done</u>                 | <u>How soon after birth</u> |                            |  |  |  |  | <small>&lt;1hr</small> | <small>&lt;6</small> | <small>6-24</small> | <small>&gt;24</small> | <small>DK</small> | 1. <input type="checkbox"/> ... | 1. <input type="checkbox"/> | 2. <input type="checkbox"/> | 3. <input type="checkbox"/> | 4. <input type="checkbox"/> | 9. <input type="checkbox"/> | 2. <input type="checkbox"/> ... | 1. <input type="checkbox"/> | 2. <input type="checkbox"/> | 3. <input type="checkbox"/> | 4. <input type="checkbox"/> | 8. <input type="checkbox"/> | 3. <input type="checkbox"/> ... | 1. <input type="checkbox"/> | 2. <input type="checkbox"/> | 3. <input type="checkbox"/> | 4. <input type="checkbox"/> | 9. <input type="checkbox"/> | 4. <input type="checkbox"/> ... | 1. <input type="checkbox"/> | 2. <input type="checkbox"/> | 3. <input type="checkbox"/> | 4. <input type="checkbox"/> | 9. <input type="checkbox"/> | 5. <input type="checkbox"/> ... | 1. <input type="checkbox"/> | 2. <input type="checkbox"/> | 3. <input type="checkbox"/> | 4. <input type="checkbox"/> | 9. <input type="checkbox"/> |
| <u>Done</u>                     | <u>How soon after birth</u>                                                                                                                                                                                                                                                             |                                                                                                                                                                                                                                                                                                                     |                                                                                                                                                                                                                                                                                                                                                                                                                                                                                                                                                                                                                                                                                                                                                                                                                                                                                                                                                                                                                                                                                                                                                                                                                                                                                                                                                                                                                                                                                                                                                                                                                                                                                                                                                                                                                                                                                                                                                                                                                                                                                                                                                                                                                                                                                                                                                                                                                                                                                                                     |                             |                             |                            |  |  |  |  |                        |                      |                     |                       |                   |                                 |                             |                             |                             |                             |                             |                                 |                             |                             |                             |                             |                             |                                 |                             |                             |                             |                             |                             |                                 |                             |                             |                             |                             |                             |                                 |                             |                             |                             |                             |                             |
|                                 | <small>&lt;1hr</small>                                                                                                                                                                                                                                                                  | <small>&lt;6</small>                                                                                                                                                                                                                                                                                                | <small>6-24</small>                                                                                                                                                                                                                                                                                                                                                                                                                                                                                                                                                                                                                                                                                                                                                                                                                                                                                                                                                                                                                                                                                                                                                                                                                                                                                                                                                                                                                                                                                                                                                                                                                                                                                                                                                                                                                                                                                                                                                                                                                                                                                                                                                                                                                                                                                                                                                                                                                                                                                                 | <small>&gt;24</small>       | <small>DK</small>           |                            |  |  |  |  |                        |                      |                     |                       |                   |                                 |                             |                             |                             |                             |                             |                                 |                             |                             |                             |                             |                             |                                 |                             |                             |                             |                             |                             |                                 |                             |                             |                             |                             |                             |                                 |                             |                             |                             |                             |                             |
| 1. <input type="checkbox"/> ... | 1. <input type="checkbox"/>                                                                                                                                                                                                                                                             | 2. <input type="checkbox"/>                                                                                                                                                                                                                                                                                         | 3. <input type="checkbox"/>                                                                                                                                                                                                                                                                                                                                                                                                                                                                                                                                                                                                                                                                                                                                                                                                                                                                                                                                                                                                                                                                                                                                                                                                                                                                                                                                                                                                                                                                                                                                                                                                                                                                                                                                                                                                                                                                                                                                                                                                                                                                                                                                                                                                                                                                                                                                                                                                                                                                                         | 4. <input type="checkbox"/> | 9. <input type="checkbox"/> |                            |  |  |  |  |                        |                      |                     |                       |                   |                                 |                             |                             |                             |                             |                             |                                 |                             |                             |                             |                             |                             |                                 |                             |                             |                             |                             |                             |                                 |                             |                             |                             |                             |                             |                                 |                             |                             |                             |                             |                             |
| 2. <input type="checkbox"/> ... | 1. <input type="checkbox"/>                                                                                                                                                                                                                                                             | 2. <input type="checkbox"/>                                                                                                                                                                                                                                                                                         | 3. <input type="checkbox"/>                                                                                                                                                                                                                                                                                                                                                                                                                                                                                                                                                                                                                                                                                                                                                                                                                                                                                                                                                                                                                                                                                                                                                                                                                                                                                                                                                                                                                                                                                                                                                                                                                                                                                                                                                                                                                                                                                                                                                                                                                                                                                                                                                                                                                                                                                                                                                                                                                                                                                         | 4. <input type="checkbox"/> | 8. <input type="checkbox"/> |                            |  |  |  |  |                        |                      |                     |                       |                   |                                 |                             |                             |                             |                             |                             |                                 |                             |                             |                             |                             |                             |                                 |                             |                             |                             |                             |                             |                                 |                             |                             |                             |                             |                             |                                 |                             |                             |                             |                             |                             |
| 3. <input type="checkbox"/> ... | 1. <input type="checkbox"/>                                                                                                                                                                                                                                                             | 2. <input type="checkbox"/>                                                                                                                                                                                                                                                                                         | 3. <input type="checkbox"/>                                                                                                                                                                                                                                                                                                                                                                                                                                                                                                                                                                                                                                                                                                                                                                                                                                                                                                                                                                                                                                                                                                                                                                                                                                                                                                                                                                                                                                                                                                                                                                                                                                                                                                                                                                                                                                                                                                                                                                                                                                                                                                                                                                                                                                                                                                                                                                                                                                                                                         | 4. <input type="checkbox"/> | 9. <input type="checkbox"/> |                            |  |  |  |  |                        |                      |                     |                       |                   |                                 |                             |                             |                             |                             |                             |                                 |                             |                             |                             |                             |                             |                                 |                             |                             |                             |                             |                             |                                 |                             |                             |                             |                             |                             |                                 |                             |                             |                             |                             |                             |
| 4. <input type="checkbox"/> ... | 1. <input type="checkbox"/>                                                                                                                                                                                                                                                             | 2. <input type="checkbox"/>                                                                                                                                                                                                                                                                                         | 3. <input type="checkbox"/>                                                                                                                                                                                                                                                                                                                                                                                                                                                                                                                                                                                                                                                                                                                                                                                                                                                                                                                                                                                                                                                                                                                                                                                                                                                                                                                                                                                                                                                                                                                                                                                                                                                                                                                                                                                                                                                                                                                                                                                                                                                                                                                                                                                                                                                                                                                                                                                                                                                                                         | 4. <input type="checkbox"/> | 9. <input type="checkbox"/> |                            |  |  |  |  |                        |                      |                     |                       |                   |                                 |                             |                             |                             |                             |                             |                                 |                             |                             |                             |                             |                             |                                 |                             |                             |                             |                             |                             |                                 |                             |                             |                             |                             |                             |                                 |                             |                             |                             |                             |                             |
| 5. <input type="checkbox"/> ... | 1. <input type="checkbox"/>                                                                                                                                                                                                                                                             | 2. <input type="checkbox"/>                                                                                                                                                                                                                                                                                         | 3. <input type="checkbox"/>                                                                                                                                                                                                                                                                                                                                                                                                                                                                                                                                                                                                                                                                                                                                                                                                                                                                                                                                                                                                                                                                                                                                                                                                                                                                                                                                                                                                                                                                                                                                                                                                                                                                                                                                                                                                                                                                                                                                                                                                                                                                                                                                                                                                                                                                                                                                                                                                                                                                                         | 4. <input type="checkbox"/> | 9. <input type="checkbox"/> |                            |  |  |  |  |                        |                      |                     |                       |                   |                                 |                             |                             |                             |                             |                             |                                 |                             |                             |                             |                             |                             |                                 |                             |                             |                             |                             |                             |                                 |                             |                             |                             |                             |                             |                                 |                             |                             |                             |                             |                             |
| S5a.6                           | Did (you / the mother) or a wet nurse ever breastfeed the baby?                                                                                                                                                                                                                         | 1. Yes<br>2. No<br>9. Don't know                                                                                                                                                                                                                                                                                    | <input type="checkbox"/> <b>2 or 9 → SQ5a.7</b>                                                                                                                                                                                                                                                                                                                                                                                                                                                                                                                                                                                                                                                                                                                                                                                                                                                                                                                                                                                                                                                                                                                                                                                                                                                                                                                                                                                                                                                                                                                                                                                                                                                                                                                                                                                                                                                                                                                                                                                                                                                                                                                                                                                                                                                                                                                                                                                                                                                                     |                             |                             |                            |  |  |  |  |                        |                      |                     |                       |                   |                                 |                             |                             |                             |                             |                             |                                 |                             |                             |                             |                             |                             |                                 |                             |                             |                             |                             |                             |                                 |                             |                             |                             |                             |                             |                                 |                             |                             |                             |                             |                             |
| S5a.6.<br>1                     | How long after birth was the baby first put to the breast?<br><i>[If immediately or less than 1 hour, record '00' hours.]</i><br><i>[If less than 24 hours, record hours; otherwise record days.]</i>                                                                                   |                                                                                                                                                                                                                                                                                                                     | <table style="width: 100%;"> <tr> <td style="width: 50%; text-align: center;">           ___ ___ Days<br/>           (DK = 99)         </td> <td style="width: 10%; text-align: center; vertical-align: middle;">OR</td> <td style="width: 40%; text-align: center;">           ___ ___ Hours<br/>           (DK = 99)         </td> </tr> </table>                                                                                                                                                                                                                                                                                                                                                                                                                                                                                                                                                                                                                                                                                                                                                                                                                                                                                                                                                                                                                                                                                                                                                                                                                                                                                                                                                                                                                                                                                                                                                                                                                                                                                                                                                                                                                                                                                                                                                                                                                                                                                                                                                                 | ___ ___ Days<br>(DK = 99)   | OR                          | ___ ___ Hours<br>(DK = 99) |  |  |  |  |                        |                      |                     |                       |                   |                                 |                             |                             |                             |                             |                             |                                 |                             |                             |                             |                             |                             |                                 |                             |                             |                             |                             |                             |                                 |                             |                             |                             |                             |                             |                                 |                             |                             |                             |                             |                             |
| ___ ___ Days<br>(DK = 99)       | OR                                                                                                                                                                                                                                                                                      | ___ ___ Hours<br>(DK = 99)                                                                                                                                                                                                                                                                                          |                                                                                                                                                                                                                                                                                                                                                                                                                                                                                                                                                                                                                                                                                                                                                                                                                                                                                                                                                                                                                                                                                                                                                                                                                                                                                                                                                                                                                                                                                                                                                                                                                                                                                                                                                                                                                                                                                                                                                                                                                                                                                                                                                                                                                                                                                                                                                                                                                                                                                                                     |                             |                             |                            |  |  |  |  |                        |                      |                     |                       |                   |                                 |                             |                             |                             |                             |                             |                                 |                             |                             |                             |                             |                             |                                 |                             |                             |                             |                             |                             |                                 |                             |                             |                             |                             |                             |                                 |                             |                             |                             |                             |                             |
| S5a.6.<br>2                     | Was the baby being breastfed at the time when the fatal illness began?                                                                                                                                                                                                                  | 1. Yes<br>2. No<br>9. Don't know                                                                                                                                                                                                                                                                                    | <input type="checkbox"/>                                                                                                                                                                                                                                                                                                                                                                                                                                                                                                                                                                                                                                                                                                                                                                                                                                                                                                                                                                                                                                                                                                                                                                                                                                                                                                                                                                                                                                                                                                                                                                                                                                                                                                                                                                                                                                                                                                                                                                                                                                                                                                                                                                                                                                                                                                                                                                                                                                                                                            |                             |                             |                            |  |  |  |  |                        |                      |                     |                       |                   |                                 |                             |                             |                             |                             |                             |                                 |                             |                             |                             |                             |                             |                                 |                             |                             |                             |                             |                             |                                 |                             |                             |                             |                             |                             |                                 |                             |                             |                             |                             |                             |
| S5a.7                           | At the time the fatal illness began, was the baby being given any other liquid, including non-human milk or formula, fruit juice, tea or water, or any semisolid or soft foods such as cereal?<br><br><i>[Multiple answers allowed. Probe, and record all liquids and foods given.]</i> | 1. Non-human milk or pre-mixed formula ..<br>2. Powdered formula mixed with a liquid ...<br>3. Juice, water and/or water-based drinks.<br>4. ORS .....<br>5. Drops or syrups (vitamins, medicines)<br>6. Semi-solid or soft foods.....<br>7. Nothing else, <u>only</u> given breast milk.....<br>9. Don't know..... | 1. <input type="checkbox"/><br>2. <input type="checkbox"/><br>3. <input type="checkbox"/><br>4. <input type="checkbox"/><br>5. <input type="checkbox"/><br>6. <input type="checkbox"/><br>7. <input type="checkbox"/><br>9. <input type="checkbox"/>                                                                                                                                                                                                                                                                                                                                                                                                                                                                                                                                                                                                                                                                                                                                                                                                                                                                                                                                                                                                                                                                                                                                                                                                                                                                                                                                                                                                                                                                                                                                                                                                                                                                                                                                                                                                                                                                                                                                                                                                                                                                                                                                                                                                                                                                |                             |                             |                            |  |  |  |  |                        |                      |                     |                       |                   |                                 |                             |                             |                             |                             |                             |                                 |                             |                             |                             |                             |                             |                                 |                             |                             |                             |                             |                             |                                 |                             |                             |                             |                             |                             |                                 |                             |                             |                             |                             |                             |
| V3.11                           | Was the baby able to suckle in a normal way during the first day of life?                                                                                                                                                                                                               | 1. Yes<br>2. No<br>9. Don't know                                                                                                                                                                                                                                                                                    | <input type="checkbox"/> <b>1 → VQ3.13</b>                                                                                                                                                                                                                                                                                                                                                                                                                                                                                                                                                                                                                                                                                                                                                                                                                                                                                                                                                                                                                                                                                                                                                                                                                                                                                                                                                                                                                                                                                                                                                                                                                                                                                                                                                                                                                                                                                                                                                                                                                                                                                                                                                                                                                                                                                                                                                                                                                                                                          |                             |                             |                            |  |  |  |  |                        |                      |                     |                       |                   |                                 |                             |                             |                             |                             |                             |                                 |                             |                             |                             |                             |                             |                                 |                             |                             |                             |                             |                             |                                 |                             |                             |                             |                             |                             |                                 |                             |                             |                             |                             |                             |
| V3.12                           | Did the baby ever suckle in a normal way?                                                                                                                                                                                                                                               | 1. Yes<br>2. No<br>9. Don't know                                                                                                                                                                                                                                                                                    | <input type="checkbox"/> <b>2 or 9 → VQ3.17</b>                                                                                                                                                                                                                                                                                                                                                                                                                                                                                                                                                                                                                                                                                                                                                                                                                                                                                                                                                                                                                                                                                                                                                                                                                                                                                                                                                                                                                                                                                                                                                                                                                                                                                                                                                                                                                                                                                                                                                                                                                                                                                                                                                                                                                                                                                                                                                                                                                                                                     |                             |                             |                            |  |  |  |  |                        |                      |                     |                       |                   |                                 |                             |                             |                             |                             |                             |                                 |                             |                             |                             |                             |                             |                                 |                             |                             |                             |                             |                             |                                 |                             |                             |                             |                             |                             |                                 |                             |                             |                             |                             |                             |
| V3.13                           | Did the baby stop being able to suckle in a normal way?                                                                                                                                                                                                                                 | 1. Yes<br>2. No<br>9. Don't know                                                                                                                                                                                                                                                                                    | <input type="checkbox"/> <b>2 or 9 → VQ3.17</b>                                                                                                                                                                                                                                                                                                                                                                                                                                                                                                                                                                                                                                                                                                                                                                                                                                                                                                                                                                                                                                                                                                                                                                                                                                                                                                                                                                                                                                                                                                                                                                                                                                                                                                                                                                                                                                                                                                                                                                                                                                                                                                                                                                                                                                                                                                                                                                                                                                                                     |                             |                             |                            |  |  |  |  |                        |                      |                     |                       |                   |                                 |                             |                             |                             |                             |                             |                                 |                             |                             |                             |                             |                             |                                 |                             |                             |                             |                             |                             |                                 |                             |                             |                             |                             |                             |                                 |                             |                             |                             |                             |                             |
| V3.14                           | How long after birth did the baby stop suckling?<br><i>[Less than 24 hours = "00" days]</i>                                                                                                                                                                                             |                                                                                                                                                                                                                                                                                                                     | ___ ___ Days<br>(DK = 99)                                                                                                                                                                                                                                                                                                                                                                                                                                                                                                                                                                                                                                                                                                                                                                                                                                                                                                                                                                                                                                                                                                                                                                                                                                                                                                                                                                                                                                                                                                                                                                                                                                                                                                                                                                                                                                                                                                                                                                                                                                                                                                                                                                                                                                                                                                                                                                                                                                                                                           |                             |                             |                            |  |  |  |  |                        |                      |                     |                       |                   |                                 |                             |                             |                             |                             |                             |                                 |                             |                             |                             |                             |                             |                                 |                             |                             |                             |                             |                             |                                 |                             |                             |                             |                             |                             |                                 |                             |                             |                             |                             |                             |
| V3.15                           | How long before s/he died did the baby stop suckling?                                                                                                                                                                                                                                   | 1. Less than one day<br>2. One day or more<br>9. Don't know                                                                                                                                                                                                                                                         | <input type="checkbox"/>                                                                                                                                                                                                                                                                                                                                                                                                                                                                                                                                                                                                                                                                                                                                                                                                                                                                                                                                                                                                                                                                                                                                                                                                                                                                                                                                                                                                                                                                                                                                                                                                                                                                                                                                                                                                                                                                                                                                                                                                                                                                                                                                                                                                                                                                                                                                                                                                                                                                                            |                             |                             |                            |  |  |  |  |                        |                      |                     |                       |                   |                                 |                             |                             |                             |                             |                             |                                 |                             |                             |                             |                             |                             |                                 |                             |                             |                             |                             |                             |                                 |                             |                             |                             |                             |                             |                                 |                             |                             |                             |                             |                             |

Study ID#

|                 |  |  |  |    |  |  |  |       |  |  |  |
|-----------------|--|--|--|----|--|--|--|-------|--|--|--|
|                 |  |  |  |    |  |  |  |       |  |  |  |
| Village/Cluster |  |  |  | HH |  |  |  | Child |  |  |  |

**CHILD HEALTH EPIDEMIOLOGY REFERENCE GROUP  
SB/NN/CHILD VERBAL/SOCIAL AUTOPSY QUESTIONNAIRE**

|       |                                                                                                         |                                  |                                          |
|-------|---------------------------------------------------------------------------------------------------------|----------------------------------|------------------------------------------|
| V3.16 | Was the baby able to open her/his mouth at the time s/he stopped suckling?                              | 1. Yes<br>2. No<br>9. Don't know | <input type="checkbox"/>                 |
| V3.17 | During the illness that led to death, did the baby have difficult breathing?                            | 1. Yes<br>2. No<br>9. Don't know | <input type="checkbox"/> 2 or 9 → VQ3.20 |
| V3.18 | At what age did the difficult breathing start?<br>[Less than 24 hours = "00" days]                      |                                  | ____ Days<br>(DK = 99)                   |
| V3.19 | For how many days did the difficult breathing last?<br>[Less than 24 hours = "00" days]                 |                                  | ____ Days<br>(DK = 99)                   |
| V3.20 | During the illness that led to death, did the baby have fast breathing?                                 | 1. Yes<br>2. No<br>9. Don't know | <input type="checkbox"/> 2 or 9 → VQ3.23 |
| V3.21 | At what age did the fast breathing start?<br>[Less than 24 hours = "00" days]                           |                                  | ____ Days<br>(DK = 99)                   |
| V3.22 | For how many days did the fast breathing last?<br>[Less than 24 hours = "00" days]                      |                                  | ____ Days<br>(DK = 99)                   |
| V3.23 | During the illness that led to death, did the baby have indrawing of the chest?<br>[Show photo]         | 1. Yes<br>2. No<br>9. Don't know | <input type="checkbox"/>                 |
| V3.24 | During the illness that led to death, did the baby have grunting?<br>[Demonstrate grunting]             | 1. Yes<br>2. No<br>9. Don't know | <input type="checkbox"/>                 |
| V3.25 | During the illness that led to death, did the baby have spasms or convulsions?                          | 1. Yes<br>2. No<br>9. Don't know | <input type="checkbox"/>                 |
| V3.26 | During the illness that led to death, did the baby have fever?                                          | 1. Yes<br>2. No<br>9. Don't know | <input type="checkbox"/> 2 or 9 → VQ3.29 |
| V3.27 | At what age did the fever start?<br>[Less than 24 hours = "00" days]                                    |                                  | ____ Days<br>(DK = 99)                   |
| V3.28 | How many days did the fever last?<br>[Less than 24 hours = "00" days]                                   |                                  | ____ Days<br>(DK = 99)                   |
| V3.29 | During the illness that led to death, did the baby become cold to touch?                                | 1. Yes<br>2. No<br>9. Don't know | <input type="checkbox"/> 2 or 9 → VQ3.32 |
| V3.30 | At what age did the baby start feeling cold to touch?<br>[Less than 24 hours = "00" days]               |                                  | ____ Days<br>(DK = 99)                   |
| V3.31 | How many days did the baby feel cold to touch?<br>[Less than 24 hours = "00" days]                      |                                  | ____ Days<br>(DK = 99)                   |
| V3.32 | During the illness that led to death, did the baby become lethargic, after a period of normal activity? | 1. Yes<br>2. No<br>9. Don't know | <input type="checkbox"/>                 |
| V3.33 | During the illness that led to death, did the baby become unresponsive or unconscious?                  | 1. Yes<br>2. No<br>9. Don't know | <input type="checkbox"/>                 |

Study ID#

|                 |  |  |  |    |  |       |  |  |  |
|-----------------|--|--|--|----|--|-------|--|--|--|
|                 |  |  |  |    |  |       |  |  |  |
| Village/Cluster |  |  |  | HH |  | Child |  |  |  |

**CHILD HEALTH EPIDEMIOLOGY REFERENCE GROUP  
SB/NN/CHILD VERBAL/SOCIAL AUTOPSY QUESTIONNAIRE**

|         |                                                                                                                    |                                                                                        |                                           |
|---------|--------------------------------------------------------------------------------------------------------------------|----------------------------------------------------------------------------------------|-------------------------------------------|
| V3.34   | During the illness that led to death, did the baby have a bulging fontanelle?<br><i>[Show photo]</i>               | 1. Yes<br>2. No<br>9. Don't know                                                       | <input type="checkbox"/>                  |
| V3.35   | During the illness that led to death, did the baby have pus drainage from the umbilical cord stump?                | 1. Yes<br>2. No<br>9. Don't know                                                       | <input type="checkbox"/>                  |
| V3.36   | During the illness that led to death, did the baby have redness of the umbilical cord stump?                       | 1. Yes<br>2. No<br>9. Don't know                                                       | <input type="checkbox"/> 2 or 9 → VQ3.38  |
| V3.37   | Did the redness of the umbilical cord stump extend onto the abdominal skin?                                        | 1. Yes<br>2. No<br>9. Don't know                                                       | <input type="checkbox"/>                  |
| V3.38   | During the illness that led to death, did the baby have skin bumps containing pus or a single large area with pus? | 1. Yes<br>2. No<br>9. Don't know                                                       | <input type="checkbox"/>                  |
| V3.39   | During the illness that led to death, did the baby have ulcer(s) (pits)?                                           | 1. Yes<br>2. No<br>9. Don't know                                                       | <input type="checkbox"/>                  |
| V3.40   | During the illness that led to death, did the baby have an area(s) of skin with redness and swelling?              | 1. Yes<br>2. No<br>9. Don't know                                                       | <input type="checkbox"/>                  |
| V3.41   | During the illness that led to death, did s/he have areas of the skin that turned black?                           | 1. Yes<br>2. No<br>9. Don't know                                                       | <input type="checkbox"/>                  |
| V3.42   | During the illness that led to death, did the baby bleed from anywhere?                                            | 1. Yes<br>2. No<br>9. Don't know                                                       | <input type="checkbox"/> 2 or 9 → VQ3.44  |
| V3.43   | <i>Record from where did the baby bleed:</i>                                                                       |                                                                                        |                                           |
| V3.44   | During the illness that led to death, did s/he have more frequent loose or liquid stools than usual?               | 1. Yes<br>2. No<br>9. Don't know                                                       | <input type="checkbox"/> 2 or 9 → VQ3.46  |
| V3.45   | How many stools did the baby have on the day that diarrhea/loose liquid stools were most frequent?                 |                                                                                        | ____ Stools<br>(DK = 99)                  |
| V3.46   | During the illness that led to death, did s/he vomit everything?                                                   | 1. Yes<br>2. No<br>9. Don't know                                                       | <input type="checkbox"/>                  |
| V3.47   | During the illness that led to death, did s/he have yellow skin?                                                   | 1. Yes<br>2. No<br>9. Don't know                                                       | <input type="checkbox"/>                  |
| V3.48   | During the illness that led to death, did the baby have yellow eyes?                                               | 1. Yes<br>2. No<br>9. Don't know                                                       | <input type="checkbox"/>                  |
| V3.49   | Did the infant appear to be healthy and then just die suddenly?                                                    | 1. Yes<br>2. No<br>9. Don't know                                                       | <input type="checkbox"/>                  |
| S5a.8   | <i>Check SQ4.17 to determine if the baby was born in a health facility (codes 1-2):</i>                            | 1. Yes, born in a health facility<br>2. Not born in a health facility<br>9. Don't know | <input type="checkbox"/> 2 or 9 → SQ5a.10 |
| S5a.8.1 | Did the baby leave the delivery facility alive or did s/he die in the facility?                                    | 1. Yes, left alive<br>2. Died in the facility<br>9. Don't know                         | <input type="checkbox"/> 2 or 9 → SQ6.1   |



Study ID#

|                 |  |  |    |  |  |       |  |  |  |
|-----------------|--|--|----|--|--|-------|--|--|--|
|                 |  |  |    |  |  |       |  |  |  |
| Village/Cluster |  |  | HH |  |  | Child |  |  |  |

**CHILD HEALTH EPIDEMIOLOGY REFERENCE GROUP  
SB/NN/CHILD VERBAL/SOCIAL AUTOPSY QUESTIONNAIRE**

| S5a.8.<br>2                                                  | <p>How soon after birth did the baby leave the facility?<br/> <i>[Record hours if less than 24 hours—if less than 1 hour, record '00' hours; Record days if 1 day or more.]</i></p>                                                                                                                                                                                                                                                                           | <p style="text-align: right;">____ Days<br/>(DK = 99)</p> <p style="text-align: center; border: 1px solid black; width: 40px; margin: 0 auto;">OR</p> <p style="text-align: right;">____ Hours<br/>(DK = 99)</p>                                                                                                                                                                                                                                                                                                                                                                                                                                                                                                                                                                                                                                                                                                                                                                                                                                                                                                                                                                                                                                                                                                                                                                                                                                                                                                                                                                                                                                                                                                                                                                                                                                                                                                                                                                                                                                                                                                                                                                                                                                                                                                                                                                                                                                                                                                                                                                                                                                                                                                                                                                                                                                                                             |                             |                             |                             |                                          |                                   |       |                                              |                                   |       |                    |                             |       |                    |                             |                             |                             |                             |                             |                             |                             |                                           |       |       |       |                             |                             |                             |                                        |       |       |       |                             |                             |                             |                                           |  |  |  |  |  |  |                                 |                             |                             |                             |                             |                             |                             |                       |                             |                             |                             |                             |                             |                             |                |                             |                             |                             |                             |                             |                             |                           |                             |                             |                             |                             |                             |                             |                |                             |                             |                             |                             |                             |                             |                      |  |  |  |  |  |  |
|--------------------------------------------------------------|---------------------------------------------------------------------------------------------------------------------------------------------------------------------------------------------------------------------------------------------------------------------------------------------------------------------------------------------------------------------------------------------------------------------------------------------------------------|----------------------------------------------------------------------------------------------------------------------------------------------------------------------------------------------------------------------------------------------------------------------------------------------------------------------------------------------------------------------------------------------------------------------------------------------------------------------------------------------------------------------------------------------------------------------------------------------------------------------------------------------------------------------------------------------------------------------------------------------------------------------------------------------------------------------------------------------------------------------------------------------------------------------------------------------------------------------------------------------------------------------------------------------------------------------------------------------------------------------------------------------------------------------------------------------------------------------------------------------------------------------------------------------------------------------------------------------------------------------------------------------------------------------------------------------------------------------------------------------------------------------------------------------------------------------------------------------------------------------------------------------------------------------------------------------------------------------------------------------------------------------------------------------------------------------------------------------------------------------------------------------------------------------------------------------------------------------------------------------------------------------------------------------------------------------------------------------------------------------------------------------------------------------------------------------------------------------------------------------------------------------------------------------------------------------------------------------------------------------------------------------------------------------------------------------------------------------------------------------------------------------------------------------------------------------------------------------------------------------------------------------------------------------------------------------------------------------------------------------------------------------------------------------------------------------------------------------------------------------------------------------|-----------------------------|-----------------------------|-----------------------------|------------------------------------------|-----------------------------------|-------|----------------------------------------------|-----------------------------------|-------|--------------------|-----------------------------|-------|--------------------|-----------------------------|-----------------------------|-----------------------------|-----------------------------|-----------------------------|-----------------------------|-----------------------------|-------------------------------------------|-------|-------|-------|-----------------------------|-----------------------------|-----------------------------|----------------------------------------|-------|-------|-------|-----------------------------|-----------------------------|-----------------------------|-------------------------------------------|--|--|--|--|--|--|---------------------------------|-----------------------------|-----------------------------|-----------------------------|-----------------------------|-----------------------------|-----------------------------|-----------------------|-----------------------------|-----------------------------|-----------------------------|-----------------------------|-----------------------------|-----------------------------|----------------|-----------------------------|-----------------------------|-----------------------------|-----------------------------|-----------------------------|-----------------------------|---------------------------|-----------------------------|-----------------------------|-----------------------------|-----------------------------|-----------------------------|-----------------------------|----------------|-----------------------------|-----------------------------|-----------------------------|-----------------------------|-----------------------------|-----------------------------|----------------------|--|--|--|--|--|--|
| S5a.8.<br>3                                                  | <p>Was the child examined by a health worker prior to discharge?</p>                                                                                                                                                                                                                                                                                                                                                                                          | <p>1. Yes<br/>2. No<br/>9. Don't know</p> <p style="text-align: center;"><input type="checkbox"/></p>                                                                                                                                                                                                                                                                                                                                                                                                                                                                                                                                                                                                                                                                                                                                                                                                                                                                                                                                                                                                                                                                                                                                                                                                                                                                                                                                                                                                                                                                                                                                                                                                                                                                                                                                                                                                                                                                                                                                                                                                                                                                                                                                                                                                                                                                                                                                                                                                                                                                                                                                                                                                                                                                                                                                                                                        |                             |                             |                             |                                          |                                   |       |                                              |                                   |       |                    |                             |       |                    |                             |                             |                             |                             |                             |                             |                             |                                           |       |       |       |                             |                             |                             |                                        |       |       |       |                             |                             |                             |                                           |  |  |  |  |  |  |                                 |                             |                             |                             |                             |                             |                             |                       |                             |                             |                             |                             |                             |                             |                |                             |                             |                             |                             |                             |                             |                           |                             |                             |                             |                             |                             |                             |                |                             |                             |                             |                             |                             |                             |                      |  |  |  |  |  |  |
| S5a.9                                                        | <p>Did (you / the mother) receive any counselling by a health worker prior to discharge?</p>                                                                                                                                                                                                                                                                                                                                                                  | <p>1. Yes<br/>2. No<br/>9. Don't know</p> <p style="text-align: center;"><input type="checkbox"/> <b>2 or 9 → SQ5a.10</b></p>                                                                                                                                                                                                                                                                                                                                                                                                                                                                                                                                                                                                                                                                                                                                                                                                                                                                                                                                                                                                                                                                                                                                                                                                                                                                                                                                                                                                                                                                                                                                                                                                                                                                                                                                                                                                                                                                                                                                                                                                                                                                                                                                                                                                                                                                                                                                                                                                                                                                                                                                                                                                                                                                                                                                                                |                             |                             |                             |                                          |                                   |       |                                              |                                   |       |                    |                             |       |                    |                             |                             |                             |                             |                             |                             |                             |                                           |       |       |       |                             |                             |                             |                                        |       |       |       |                             |                             |                             |                                           |  |  |  |  |  |  |                                 |                             |                             |                             |                             |                             |                             |                       |                             |                             |                             |                             |                             |                             |                |                             |                             |                             |                             |                             |                             |                           |                             |                             |                             |                             |                             |                             |                |                             |                             |                             |                             |                             |                             |                      |  |  |  |  |  |  |
| S5a.9.<br>1                                                  | <p>What (were you / was she) counselled on?<br/> <i>[Multiple answers allowed].</i><br/> <i>Probe: Anything else?</i></p>                                                                                                                                                                                                                                                                                                                                     | <p>1. Breastfeeding.....<br/>2. Immunization.....<br/>3. Post-natal care attendance.....<br/>4. Danger signs of newborn illness.....<br/>5. Other (specify).....<br/>9. Don't know.....</p> <p>1. <input type="checkbox"/><br/>2. <input type="checkbox"/><br/>3. <input type="checkbox"/><br/>4. <input type="checkbox"/><br/>5. <input type="checkbox"/><br/>9. <input type="checkbox"/></p>                                                                                                                                                                                                                                                                                                                                                                                                                                                                                                                                                                                                                                                                                                                                                                                                                                                                                                                                                                                                                                                                                                                                                                                                                                                                                                                                                                                                                                                                                                                                                                                                                                                                                                                                                                                                                                                                                                                                                                                                                                                                                                                                                                                                                                                                                                                                                                                                                                                                                               |                             |                             |                             |                                          |                                   |       |                                              |                                   |       |                    |                             |       |                    |                             |                             |                             |                             |                             |                             |                             |                                           |       |       |       |                             |                             |                             |                                        |       |       |       |                             |                             |                             |                                           |  |  |  |  |  |  |                                 |                             |                             |                             |                             |                             |                             |                       |                             |                             |                             |                             |                             |                             |                |                             |                             |                             |                             |                             |                             |                           |                             |                             |                             |                             |                             |                             |                |                             |                             |                             |                             |                             |                             |                      |  |  |  |  |  |  |
| S5a.10                                                       | <p>Was the baby ever seen by a health worker or nurse at home or in the community, or by a doctor or nurse at a health facility <u>before</u> the fatal illness began?<br/> <i>[Multiple answers allowed].</i><br/> <i>For each mentioned, ask:<br/>How many times was the baby seen by a &lt;PROVIDER TYPE at PLACE&gt; before the fatal illness began?</i><br/> <i>Then ask:<br/>When was the baby first seen by (this / any of these) provider(s)?</i></p> | <table border="1" style="width: 100%; border-collapse: collapse;"> <thead> <tr> <th style="width: 30%; text-align: left;">Seen</th> <th style="width: 30%; text-align: left;">Times</th> <th style="width: 40%; text-align: left;">First visit</th> </tr> </thead> <tbody> <tr> <td>1. CHW or nurse at home/in community....</td> <td>1. <input type="checkbox"/> .....</td> <td>.....</td> </tr> <tr> <td>2. Doctor or nurse at a health facility.....</td> <td>2. <input type="checkbox"/> .....</td> <td>.....</td> </tr> <tr> <td>3. Never seen.....</td> <td>3. <input type="checkbox"/></td> <td>.....</td> </tr> <tr> <td>9. Don't know.....</td> <td>9. <input type="checkbox"/></td> <td>.....</td> </tr> </tbody> </table> <p style="text-align: right; margin-top: 10px;">Days old<br/>(&lt;1 = 00;<br/>DK = 99)</p>                                                                                                                                                                                                                                                                                                                                                                                                                                                                                                                                                                                                                                                                                                                                                                                                                                                                                                                                                                                                                                                                                                                                                                                                                                                                                                                                                                                                                                                                                                                                                                                                                                                                                                                                                                                                                                                                                                                                                                                                                                                              | Seen                        | Times                       | First visit                 | 1. CHW or nurse at home/in community.... | 1. <input type="checkbox"/> ..... | ..... | 2. Doctor or nurse at a health facility..... | 2. <input type="checkbox"/> ..... | ..... | 3. Never seen..... | 3. <input type="checkbox"/> | ..... | 9. Don't know..... | 9. <input type="checkbox"/> | .....                       |                             |                             |                             |                             |                             |                                           |       |       |       |                             |                             |                             |                                        |       |       |       |                             |                             |                             |                                           |  |  |  |  |  |  |                                 |                             |                             |                             |                             |                             |                             |                       |                             |                             |                             |                             |                             |                             |                |                             |                             |                             |                             |                             |                             |                           |                             |                             |                             |                             |                             |                             |                |                             |                             |                             |                             |                             |                             |                      |  |  |  |  |  |  |
| Seen                                                         | Times                                                                                                                                                                                                                                                                                                                                                                                                                                                         | First visit                                                                                                                                                                                                                                                                                                                                                                                                                                                                                                                                                                                                                                                                                                                                                                                                                                                                                                                                                                                                                                                                                                                                                                                                                                                                                                                                                                                                                                                                                                                                                                                                                                                                                                                                                                                                                                                                                                                                                                                                                                                                                                                                                                                                                                                                                                                                                                                                                                                                                                                                                                                                                                                                                                                                                                                                                                                                                  |                             |                             |                             |                                          |                                   |       |                                              |                                   |       |                    |                             |       |                    |                             |                             |                             |                             |                             |                             |                             |                                           |       |       |       |                             |                             |                             |                                        |       |       |       |                             |                             |                             |                                           |  |  |  |  |  |  |                                 |                             |                             |                             |                             |                             |                             |                       |                             |                             |                             |                             |                             |                             |                |                             |                             |                             |                             |                             |                             |                           |                             |                             |                             |                             |                             |                             |                |                             |                             |                             |                             |                             |                             |                      |  |  |  |  |  |  |
| 1. CHW or nurse at home/in community....                     | 1. <input type="checkbox"/> .....                                                                                                                                                                                                                                                                                                                                                                                                                             | .....                                                                                                                                                                                                                                                                                                                                                                                                                                                                                                                                                                                                                                                                                                                                                                                                                                                                                                                                                                                                                                                                                                                                                                                                                                                                                                                                                                                                                                                                                                                                                                                                                                                                                                                                                                                                                                                                                                                                                                                                                                                                                                                                                                                                                                                                                                                                                                                                                                                                                                                                                                                                                                                                                                                                                                                                                                                                                        |                             |                             |                             |                                          |                                   |       |                                              |                                   |       |                    |                             |       |                    |                             |                             |                             |                             |                             |                             |                             |                                           |       |       |       |                             |                             |                             |                                        |       |       |       |                             |                             |                             |                                           |  |  |  |  |  |  |                                 |                             |                             |                             |                             |                             |                             |                       |                             |                             |                             |                             |                             |                             |                |                             |                             |                             |                             |                             |                             |                           |                             |                             |                             |                             |                             |                             |                |                             |                             |                             |                             |                             |                             |                      |  |  |  |  |  |  |
| 2. Doctor or nurse at a health facility.....                 | 2. <input type="checkbox"/> .....                                                                                                                                                                                                                                                                                                                                                                                                                             | .....                                                                                                                                                                                                                                                                                                                                                                                                                                                                                                                                                                                                                                                                                                                                                                                                                                                                                                                                                                                                                                                                                                                                                                                                                                                                                                                                                                                                                                                                                                                                                                                                                                                                                                                                                                                                                                                                                                                                                                                                                                                                                                                                                                                                                                                                                                                                                                                                                                                                                                                                                                                                                                                                                                                                                                                                                                                                                        |                             |                             |                             |                                          |                                   |       |                                              |                                   |       |                    |                             |       |                    |                             |                             |                             |                             |                             |                             |                             |                                           |       |       |       |                             |                             |                             |                                        |       |       |       |                             |                             |                             |                                           |  |  |  |  |  |  |                                 |                             |                             |                             |                             |                             |                             |                       |                             |                             |                             |                             |                             |                             |                |                             |                             |                             |                             |                             |                             |                           |                             |                             |                             |                             |                             |                             |                |                             |                             |                             |                             |                             |                             |                      |  |  |  |  |  |  |
| 3. Never seen.....                                           | 3. <input type="checkbox"/>                                                                                                                                                                                                                                                                                                                                                                                                                                   | .....                                                                                                                                                                                                                                                                                                                                                                                                                                                                                                                                                                                                                                                                                                                                                                                                                                                                                                                                                                                                                                                                                                                                                                                                                                                                                                                                                                                                                                                                                                                                                                                                                                                                                                                                                                                                                                                                                                                                                                                                                                                                                                                                                                                                                                                                                                                                                                                                                                                                                                                                                                                                                                                                                                                                                                                                                                                                                        |                             |                             |                             |                                          |                                   |       |                                              |                                   |       |                    |                             |       |                    |                             |                             |                             |                             |                             |                             |                             |                                           |       |       |       |                             |                             |                             |                                        |       |       |       |                             |                             |                             |                                           |  |  |  |  |  |  |                                 |                             |                             |                             |                             |                             |                             |                       |                             |                             |                             |                             |                             |                             |                |                             |                             |                             |                             |                             |                             |                           |                             |                             |                             |                             |                             |                             |                |                             |                             |                             |                             |                             |                             |                      |  |  |  |  |  |  |
| 9. Don't know.....                                           | 9. <input type="checkbox"/>                                                                                                                                                                                                                                                                                                                                                                                                                                   | .....                                                                                                                                                                                                                                                                                                                                                                                                                                                                                                                                                                                                                                                                                                                                                                                                                                                                                                                                                                                                                                                                                                                                                                                                                                                                                                                                                                                                                                                                                                                                                                                                                                                                                                                                                                                                                                                                                                                                                                                                                                                                                                                                                                                                                                                                                                                                                                                                                                                                                                                                                                                                                                                                                                                                                                                                                                                                                        |                             |                             |                             |                                          |                                   |       |                                              |                                   |       |                    |                             |       |                    |                             |                             |                             |                             |                             |                             |                             |                                           |       |       |       |                             |                             |                             |                                        |       |       |       |                             |                             |                             |                                           |  |  |  |  |  |  |                                 |                             |                             |                             |                             |                             |                             |                       |                             |                             |                             |                             |                             |                             |                |                             |                             |                             |                             |                             |                             |                           |                             |                             |                             |                             |                             |                             |                |                             |                             |                             |                             |                             |                             |                      |  |  |  |  |  |  |
| S5a.11                                                       | <p><u>Before</u> the fatal illness began, did &lt;NAME&gt; suffer from any of the following known conditions:<br/> <i>[Read out all conditions and check "Yes," "No" or "Don't know" for each.]</i><br/> <i>If "Yes," then ask: Was s/he provided any treatment for this condition?</i></p>                                                                                                                                                                   | <table border="1" style="width: 100%; border-collapse: collapse;"> <thead> <tr> <th rowspan="2"></th> <th colspan="3" style="text-align: center;">Suffered from</th> <th colspan="3" style="text-align: center;">Treatment</th> </tr> <tr> <th style="text-align: center;">Yes</th> <th style="text-align: center;">No</th> <th style="text-align: center;">DK</th> <th style="text-align: center;">Yes</th> <th style="text-align: center;">No</th> <th style="text-align: center;">DK</th> </tr> </thead> <tbody> <tr> <td>1. Preterm birth.....</td> <td>1. <input type="checkbox"/></td> <td>2. <input type="checkbox"/></td> <td>9. <input type="checkbox"/></td> <td>1. <input type="checkbox"/></td> <td>2. <input type="checkbox"/></td> <td>9. <input type="checkbox"/></td> </tr> <tr> <td>    a. Was s/he given special nutrition? ....</td> <td>.....</td> <td>.....</td> <td>.....</td> <td>1. <input type="checkbox"/></td> <td>2. <input type="checkbox"/></td> <td>9. <input type="checkbox"/></td> </tr> <tr> <td>    b. Was s/he given "kangaroo care"?....</td> <td>.....</td> <td>.....</td> <td>.....</td> <td>1. <input type="checkbox"/></td> <td>2. <input type="checkbox"/></td> <td>9. <input type="checkbox"/></td> </tr> <tr> <td>2. Malformation (from the time of birth):</td> <td></td> <td></td> <td></td> <td></td> <td></td> <td></td> </tr> <tr> <td>    a. Head, neck and/or back .....</td> <td>1. <input type="checkbox"/></td> <td>2. <input type="checkbox"/></td> <td>9. <input type="checkbox"/></td> <td>1. <input type="checkbox"/></td> <td>2. <input type="checkbox"/></td> <td>9. <input type="checkbox"/></td> </tr> <tr> <td>    b. Mouth/palate .....</td> <td>1. <input type="checkbox"/></td> <td>2. <input type="checkbox"/></td> <td>9. <input type="checkbox"/></td> <td>1. <input type="checkbox"/></td> <td>2. <input type="checkbox"/></td> <td>9. <input type="checkbox"/></td> </tr> <tr> <td>    c. Heart .....</td> <td>1. <input type="checkbox"/></td> <td>2. <input type="checkbox"/></td> <td>9. <input type="checkbox"/></td> <td>1. <input type="checkbox"/></td> <td>2. <input type="checkbox"/></td> <td>9. <input type="checkbox"/></td> </tr> <tr> <td>    d. Arms and/or legs .....</td> <td>1. <input type="checkbox"/></td> <td>2. <input type="checkbox"/></td> <td>9. <input type="checkbox"/></td> <td>1. <input type="checkbox"/></td> <td>2. <input type="checkbox"/></td> <td>9. <input type="checkbox"/></td> </tr> <tr> <td>3. Other .....</td> <td>1. <input type="checkbox"/></td> <td>2. <input type="checkbox"/></td> <td>9. <input type="checkbox"/></td> <td>1. <input type="checkbox"/></td> <td>2. <input type="checkbox"/></td> <td>9. <input type="checkbox"/></td> </tr> <tr> <td colspan="7" style="text-align: center; padding-top: 10px;">(specify other).....</td> </tr> </tbody> </table> |                             | Suffered from               |                             |                                          | Treatment                         |       |                                              | Yes                               | No    | DK                 | Yes                         | No    | DK                 | 1. Preterm birth.....       | 1. <input type="checkbox"/> | 2. <input type="checkbox"/> | 9. <input type="checkbox"/> | 1. <input type="checkbox"/> | 2. <input type="checkbox"/> | 9. <input type="checkbox"/> | a. Was s/he given special nutrition? .... | ..... | ..... | ..... | 1. <input type="checkbox"/> | 2. <input type="checkbox"/> | 9. <input type="checkbox"/> | b. Was s/he given "kangaroo care"?.... | ..... | ..... | ..... | 1. <input type="checkbox"/> | 2. <input type="checkbox"/> | 9. <input type="checkbox"/> | 2. Malformation (from the time of birth): |  |  |  |  |  |  | a. Head, neck and/or back ..... | 1. <input type="checkbox"/> | 2. <input type="checkbox"/> | 9. <input type="checkbox"/> | 1. <input type="checkbox"/> | 2. <input type="checkbox"/> | 9. <input type="checkbox"/> | b. Mouth/palate ..... | 1. <input type="checkbox"/> | 2. <input type="checkbox"/> | 9. <input type="checkbox"/> | 1. <input type="checkbox"/> | 2. <input type="checkbox"/> | 9. <input type="checkbox"/> | c. Heart ..... | 1. <input type="checkbox"/> | 2. <input type="checkbox"/> | 9. <input type="checkbox"/> | 1. <input type="checkbox"/> | 2. <input type="checkbox"/> | 9. <input type="checkbox"/> | d. Arms and/or legs ..... | 1. <input type="checkbox"/> | 2. <input type="checkbox"/> | 9. <input type="checkbox"/> | 1. <input type="checkbox"/> | 2. <input type="checkbox"/> | 9. <input type="checkbox"/> | 3. Other ..... | 1. <input type="checkbox"/> | 2. <input type="checkbox"/> | 9. <input type="checkbox"/> | 1. <input type="checkbox"/> | 2. <input type="checkbox"/> | 9. <input type="checkbox"/> | (specify other)..... |  |  |  |  |  |  |
|                                                              | Suffered from                                                                                                                                                                                                                                                                                                                                                                                                                                                 |                                                                                                                                                                                                                                                                                                                                                                                                                                                                                                                                                                                                                                                                                                                                                                                                                                                                                                                                                                                                                                                                                                                                                                                                                                                                                                                                                                                                                                                                                                                                                                                                                                                                                                                                                                                                                                                                                                                                                                                                                                                                                                                                                                                                                                                                                                                                                                                                                                                                                                                                                                                                                                                                                                                                                                                                                                                                                              |                             | Treatment                   |                             |                                          |                                   |       |                                              |                                   |       |                    |                             |       |                    |                             |                             |                             |                             |                             |                             |                             |                                           |       |       |       |                             |                             |                             |                                        |       |       |       |                             |                             |                             |                                           |  |  |  |  |  |  |                                 |                             |                             |                             |                             |                             |                             |                       |                             |                             |                             |                             |                             |                             |                |                             |                             |                             |                             |                             |                             |                           |                             |                             |                             |                             |                             |                             |                |                             |                             |                             |                             |                             |                             |                      |  |  |  |  |  |  |
|                                                              | Yes                                                                                                                                                                                                                                                                                                                                                                                                                                                           | No                                                                                                                                                                                                                                                                                                                                                                                                                                                                                                                                                                                                                                                                                                                                                                                                                                                                                                                                                                                                                                                                                                                                                                                                                                                                                                                                                                                                                                                                                                                                                                                                                                                                                                                                                                                                                                                                                                                                                                                                                                                                                                                                                                                                                                                                                                                                                                                                                                                                                                                                                                                                                                                                                                                                                                                                                                                                                           | DK                          | Yes                         | No                          | DK                                       |                                   |       |                                              |                                   |       |                    |                             |       |                    |                             |                             |                             |                             |                             |                             |                             |                                           |       |       |       |                             |                             |                             |                                        |       |       |       |                             |                             |                             |                                           |  |  |  |  |  |  |                                 |                             |                             |                             |                             |                             |                             |                       |                             |                             |                             |                             |                             |                             |                |                             |                             |                             |                             |                             |                             |                           |                             |                             |                             |                             |                             |                             |                |                             |                             |                             |                             |                             |                             |                      |  |  |  |  |  |  |
| 1. Preterm birth.....                                        | 1. <input type="checkbox"/>                                                                                                                                                                                                                                                                                                                                                                                                                                   | 2. <input type="checkbox"/>                                                                                                                                                                                                                                                                                                                                                                                                                                                                                                                                                                                                                                                                                                                                                                                                                                                                                                                                                                                                                                                                                                                                                                                                                                                                                                                                                                                                                                                                                                                                                                                                                                                                                                                                                                                                                                                                                                                                                                                                                                                                                                                                                                                                                                                                                                                                                                                                                                                                                                                                                                                                                                                                                                                                                                                                                                                                  | 9. <input type="checkbox"/> | 1. <input type="checkbox"/> | 2. <input type="checkbox"/> | 9. <input type="checkbox"/>              |                                   |       |                                              |                                   |       |                    |                             |       |                    |                             |                             |                             |                             |                             |                             |                             |                                           |       |       |       |                             |                             |                             |                                        |       |       |       |                             |                             |                             |                                           |  |  |  |  |  |  |                                 |                             |                             |                             |                             |                             |                             |                       |                             |                             |                             |                             |                             |                             |                |                             |                             |                             |                             |                             |                             |                           |                             |                             |                             |                             |                             |                             |                |                             |                             |                             |                             |                             |                             |                      |  |  |  |  |  |  |
| a. Was s/he given special nutrition? ....                    | .....                                                                                                                                                                                                                                                                                                                                                                                                                                                         | .....                                                                                                                                                                                                                                                                                                                                                                                                                                                                                                                                                                                                                                                                                                                                                                                                                                                                                                                                                                                                                                                                                                                                                                                                                                                                                                                                                                                                                                                                                                                                                                                                                                                                                                                                                                                                                                                                                                                                                                                                                                                                                                                                                                                                                                                                                                                                                                                                                                                                                                                                                                                                                                                                                                                                                                                                                                                                                        | .....                       | 1. <input type="checkbox"/> | 2. <input type="checkbox"/> | 9. <input type="checkbox"/>              |                                   |       |                                              |                                   |       |                    |                             |       |                    |                             |                             |                             |                             |                             |                             |                             |                                           |       |       |       |                             |                             |                             |                                        |       |       |       |                             |                             |                             |                                           |  |  |  |  |  |  |                                 |                             |                             |                             |                             |                             |                             |                       |                             |                             |                             |                             |                             |                             |                |                             |                             |                             |                             |                             |                             |                           |                             |                             |                             |                             |                             |                             |                |                             |                             |                             |                             |                             |                             |                      |  |  |  |  |  |  |
| b. Was s/he given "kangaroo care"?....                       | .....                                                                                                                                                                                                                                                                                                                                                                                                                                                         | .....                                                                                                                                                                                                                                                                                                                                                                                                                                                                                                                                                                                                                                                                                                                                                                                                                                                                                                                                                                                                                                                                                                                                                                                                                                                                                                                                                                                                                                                                                                                                                                                                                                                                                                                                                                                                                                                                                                                                                                                                                                                                                                                                                                                                                                                                                                                                                                                                                                                                                                                                                                                                                                                                                                                                                                                                                                                                                        | .....                       | 1. <input type="checkbox"/> | 2. <input type="checkbox"/> | 9. <input type="checkbox"/>              |                                   |       |                                              |                                   |       |                    |                             |       |                    |                             |                             |                             |                             |                             |                             |                             |                                           |       |       |       |                             |                             |                             |                                        |       |       |       |                             |                             |                             |                                           |  |  |  |  |  |  |                                 |                             |                             |                             |                             |                             |                             |                       |                             |                             |                             |                             |                             |                             |                |                             |                             |                             |                             |                             |                             |                           |                             |                             |                             |                             |                             |                             |                |                             |                             |                             |                             |                             |                             |                      |  |  |  |  |  |  |
| 2. Malformation (from the time of birth):                    |                                                                                                                                                                                                                                                                                                                                                                                                                                                               |                                                                                                                                                                                                                                                                                                                                                                                                                                                                                                                                                                                                                                                                                                                                                                                                                                                                                                                                                                                                                                                                                                                                                                                                                                                                                                                                                                                                                                                                                                                                                                                                                                                                                                                                                                                                                                                                                                                                                                                                                                                                                                                                                                                                                                                                                                                                                                                                                                                                                                                                                                                                                                                                                                                                                                                                                                                                                              |                             |                             |                             |                                          |                                   |       |                                              |                                   |       |                    |                             |       |                    |                             |                             |                             |                             |                             |                             |                             |                                           |       |       |       |                             |                             |                             |                                        |       |       |       |                             |                             |                             |                                           |  |  |  |  |  |  |                                 |                             |                             |                             |                             |                             |                             |                       |                             |                             |                             |                             |                             |                             |                |                             |                             |                             |                             |                             |                             |                           |                             |                             |                             |                             |                             |                             |                |                             |                             |                             |                             |                             |                             |                      |  |  |  |  |  |  |
| a. Head, neck and/or back .....                              | 1. <input type="checkbox"/>                                                                                                                                                                                                                                                                                                                                                                                                                                   | 2. <input type="checkbox"/>                                                                                                                                                                                                                                                                                                                                                                                                                                                                                                                                                                                                                                                                                                                                                                                                                                                                                                                                                                                                                                                                                                                                                                                                                                                                                                                                                                                                                                                                                                                                                                                                                                                                                                                                                                                                                                                                                                                                                                                                                                                                                                                                                                                                                                                                                                                                                                                                                                                                                                                                                                                                                                                                                                                                                                                                                                                                  | 9. <input type="checkbox"/> | 1. <input type="checkbox"/> | 2. <input type="checkbox"/> | 9. <input type="checkbox"/>              |                                   |       |                                              |                                   |       |                    |                             |       |                    |                             |                             |                             |                             |                             |                             |                             |                                           |       |       |       |                             |                             |                             |                                        |       |       |       |                             |                             |                             |                                           |  |  |  |  |  |  |                                 |                             |                             |                             |                             |                             |                             |                       |                             |                             |                             |                             |                             |                             |                |                             |                             |                             |                             |                             |                             |                           |                             |                             |                             |                             |                             |                             |                |                             |                             |                             |                             |                             |                             |                      |  |  |  |  |  |  |
| b. Mouth/palate .....                                        | 1. <input type="checkbox"/>                                                                                                                                                                                                                                                                                                                                                                                                                                   | 2. <input type="checkbox"/>                                                                                                                                                                                                                                                                                                                                                                                                                                                                                                                                                                                                                                                                                                                                                                                                                                                                                                                                                                                                                                                                                                                                                                                                                                                                                                                                                                                                                                                                                                                                                                                                                                                                                                                                                                                                                                                                                                                                                                                                                                                                                                                                                                                                                                                                                                                                                                                                                                                                                                                                                                                                                                                                                                                                                                                                                                                                  | 9. <input type="checkbox"/> | 1. <input type="checkbox"/> | 2. <input type="checkbox"/> | 9. <input type="checkbox"/>              |                                   |       |                                              |                                   |       |                    |                             |       |                    |                             |                             |                             |                             |                             |                             |                             |                                           |       |       |       |                             |                             |                             |                                        |       |       |       |                             |                             |                             |                                           |  |  |  |  |  |  |                                 |                             |                             |                             |                             |                             |                             |                       |                             |                             |                             |                             |                             |                             |                |                             |                             |                             |                             |                             |                             |                           |                             |                             |                             |                             |                             |                             |                |                             |                             |                             |                             |                             |                             |                      |  |  |  |  |  |  |
| c. Heart .....                                               | 1. <input type="checkbox"/>                                                                                                                                                                                                                                                                                                                                                                                                                                   | 2. <input type="checkbox"/>                                                                                                                                                                                                                                                                                                                                                                                                                                                                                                                                                                                                                                                                                                                                                                                                                                                                                                                                                                                                                                                                                                                                                                                                                                                                                                                                                                                                                                                                                                                                                                                                                                                                                                                                                                                                                                                                                                                                                                                                                                                                                                                                                                                                                                                                                                                                                                                                                                                                                                                                                                                                                                                                                                                                                                                                                                                                  | 9. <input type="checkbox"/> | 1. <input type="checkbox"/> | 2. <input type="checkbox"/> | 9. <input type="checkbox"/>              |                                   |       |                                              |                                   |       |                    |                             |       |                    |                             |                             |                             |                             |                             |                             |                             |                                           |       |       |       |                             |                             |                             |                                        |       |       |       |                             |                             |                             |                                           |  |  |  |  |  |  |                                 |                             |                             |                             |                             |                             |                             |                       |                             |                             |                             |                             |                             |                             |                |                             |                             |                             |                             |                             |                             |                           |                             |                             |                             |                             |                             |                             |                |                             |                             |                             |                             |                             |                             |                      |  |  |  |  |  |  |
| d. Arms and/or legs .....                                    | 1. <input type="checkbox"/>                                                                                                                                                                                                                                                                                                                                                                                                                                   | 2. <input type="checkbox"/>                                                                                                                                                                                                                                                                                                                                                                                                                                                                                                                                                                                                                                                                                                                                                                                                                                                                                                                                                                                                                                                                                                                                                                                                                                                                                                                                                                                                                                                                                                                                                                                                                                                                                                                                                                                                                                                                                                                                                                                                                                                                                                                                                                                                                                                                                                                                                                                                                                                                                                                                                                                                                                                                                                                                                                                                                                                                  | 9. <input type="checkbox"/> | 1. <input type="checkbox"/> | 2. <input type="checkbox"/> | 9. <input type="checkbox"/>              |                                   |       |                                              |                                   |       |                    |                             |       |                    |                             |                             |                             |                             |                             |                             |                             |                                           |       |       |       |                             |                             |                             |                                        |       |       |       |                             |                             |                             |                                           |  |  |  |  |  |  |                                 |                             |                             |                             |                             |                             |                             |                       |                             |                             |                             |                             |                             |                             |                |                             |                             |                             |                             |                             |                             |                           |                             |                             |                             |                             |                             |                             |                |                             |                             |                             |                             |                             |                             |                      |  |  |  |  |  |  |
| 3. Other .....                                               | 1. <input type="checkbox"/>                                                                                                                                                                                                                                                                                                                                                                                                                                   | 2. <input type="checkbox"/>                                                                                                                                                                                                                                                                                                                                                                                                                                                                                                                                                                                                                                                                                                                                                                                                                                                                                                                                                                                                                                                                                                                                                                                                                                                                                                                                                                                                                                                                                                                                                                                                                                                                                                                                                                                                                                                                                                                                                                                                                                                                                                                                                                                                                                                                                                                                                                                                                                                                                                                                                                                                                                                                                                                                                                                                                                                                  | 9. <input type="checkbox"/> | 1. <input type="checkbox"/> | 2. <input type="checkbox"/> | 9. <input type="checkbox"/>              |                                   |       |                                              |                                   |       |                    |                             |       |                    |                             |                             |                             |                             |                             |                             |                             |                                           |       |       |       |                             |                             |                             |                                        |       |       |       |                             |                             |                             |                                           |  |  |  |  |  |  |                                 |                             |                             |                             |                             |                             |                             |                       |                             |                             |                             |                             |                             |                             |                |                             |                             |                             |                             |                             |                             |                           |                             |                             |                             |                             |                             |                             |                |                             |                             |                             |                             |                             |                             |                      |  |  |  |  |  |  |
| (specify other).....                                         |                                                                                                                                                                                                                                                                                                                                                                                                                                                               |                                                                                                                                                                                                                                                                                                                                                                                                                                                                                                                                                                                                                                                                                                                                                                                                                                                                                                                                                                                                                                                                                                                                                                                                                                                                                                                                                                                                                                                                                                                                                                                                                                                                                                                                                                                                                                                                                                                                                                                                                                                                                                                                                                                                                                                                                                                                                                                                                                                                                                                                                                                                                                                                                                                                                                                                                                                                                              |                             |                             |                             |                                          |                                   |       |                                              |                                   |       |                    |                             |       |                    |                             |                             |                             |                             |                             |                             |                             |                                           |       |       |       |                             |                             |                             |                                        |       |       |       |                             |                             |                             |                                           |  |  |  |  |  |  |                                 |                             |                             |                             |                             |                             |                             |                       |                             |                             |                             |                             |                             |                             |                |                             |                             |                             |                             |                             |                             |                           |                             |                             |                             |                             |                             |                             |                |                             |                             |                             |                             |                             |                             |                      |  |  |  |  |  |  |
| <b>Inst_1: STOP – If VQ1.26 = 1 (Neonatal death) → SQ6.1</b> |                                                                                                                                                                                                                                                                                                                                                                                                                                                               |                                                                                                                                                                                                                                                                                                                                                                                                                                                                                                                                                                                                                                                                                                                                                                                                                                                                                                                                                                                                                                                                                                                                                                                                                                                                                                                                                                                                                                                                                                                                                                                                                                                                                                                                                                                                                                                                                                                                                                                                                                                                                                                                                                                                                                                                                                                                                                                                                                                                                                                                                                                                                                                                                                                                                                                                                                                                                              |                             |                             |                             |                                          |                                   |       |                                              |                                   |       |                    |                             |       |                    |                             |                             |                             |                             |                             |                             |                             |                                           |       |       |       |                             |                             |                             |                                        |       |       |       |                             |                             |                             |                                           |  |  |  |  |  |  |                                 |                             |                             |                             |                             |                             |                             |                       |                             |                             |                             |                             |                             |                             |                |                             |                             |                             |                             |                             |                             |                           |                             |                             |                             |                             |                             |                             |                |                             |                             |                             |                             |                             |                             |                      |  |  |  |  |  |  |

|                 |  |  |  |    |  |  |  |       |  |  |  |
|-----------------|--|--|--|----|--|--|--|-------|--|--|--|
|                 |  |  |  |    |  |  |  |       |  |  |  |
| Village/Cluster |  |  |  | HH |  |  |  | Child |  |  |  |

**SA Module 5b: Preventive care of post-neonates (FOR CHILD DEATHS 28 DAYS—59 MONTHS OLD)**

*Read:* Now I would like to ask you about the care of the child before the fatal illness began.

| S5b.1                       | Where (do you / does the mother) cook?                                                                                                                                                                                                                                         | <ol style="list-style-type: none"> <li>1. Inside the house</li> <li>2. Outside the house</li> <li>3. In a structure outside the house</li> <li>9. Don't know</li> </ol>                                                                                                                                                                                                                                                    | <input type="checkbox"/>                                                                                                                                                                                                                                                                                                                                                                                                                                                                                                                                                                                                                                                                                                                                                                                                                                                                                                                                                |     |    |    |                             |                             |                             |                             |                             |                             |                             |                             |                             |                             |                             |                             |                             |                             |                             |                             |                             |                             |                             |                             |                             |
|-----------------------------|--------------------------------------------------------------------------------------------------------------------------------------------------------------------------------------------------------------------------------------------------------------------------------|----------------------------------------------------------------------------------------------------------------------------------------------------------------------------------------------------------------------------------------------------------------------------------------------------------------------------------------------------------------------------------------------------------------------------|-------------------------------------------------------------------------------------------------------------------------------------------------------------------------------------------------------------------------------------------------------------------------------------------------------------------------------------------------------------------------------------------------------------------------------------------------------------------------------------------------------------------------------------------------------------------------------------------------------------------------------------------------------------------------------------------------------------------------------------------------------------------------------------------------------------------------------------------------------------------------------------------------------------------------------------------------------------------------|-----|----|----|-----------------------------|-----------------------------|-----------------------------|-----------------------------|-----------------------------|-----------------------------|-----------------------------|-----------------------------|-----------------------------|-----------------------------|-----------------------------|-----------------------------|-----------------------------|-----------------------------|-----------------------------|-----------------------------|-----------------------------|-----------------------------|-----------------------------|-----------------------------|-----------------------------|
| S5b.2                       | When (you / the mother) cooked, was <NAME> usually beside or carried by (you / her)?                                                                                                                                                                                           | <ol style="list-style-type: none"> <li>1. Yes</li> <li>2. No</li> <li>9. Don't know</li> </ol>                                                                                                                                                                                                                                                                                                                             | <input type="checkbox"/>                                                                                                                                                                                                                                                                                                                                                                                                                                                                                                                                                                                                                                                                                                                                                                                                                                                                                                                                                |     |    |    |                             |                             |                             |                             |                             |                             |                             |                             |                             |                             |                             |                             |                             |                             |                             |                             |                             |                             |                             |                             |                             |
| S5b.3                       | <i>Skip SQ5b.3 in areas wo/malaria.</i><br>Before (her / his) fatal illness began, did <NAME> sleep under an insecticide treated bednet?                                                                                                                                       | <ol style="list-style-type: none"> <li>1. Yes, usually or always</li> <li>2. Yes, sometimes</li> <li>3. Never</li> <li>9. Don't know</li> </ol>                                                                                                                                                                                                                                                                            | <input type="checkbox"/>                                                                                                                                                                                                                                                                                                                                                                                                                                                                                                                                                                                                                                                                                                                                                                                                                                                                                                                                                |     |    |    |                             |                             |                             |                             |                             |                             |                             |                             |                             |                             |                             |                             |                             |                             |                             |                             |                             |                             |                             |                             |                             |
| S5b.4                       | Did (you / the mother) or a wet nurse ever breastfeed <NAME>?                                                                                                                                                                                                                  | <ol style="list-style-type: none"> <li>3. Yes</li> <li>4. No</li> <li>9. Don't know</li> </ol>                                                                                                                                                                                                                                                                                                                             | <input type="checkbox"/> 2 or 9 → SQ5b.5                                                                                                                                                                                                                                                                                                                                                                                                                                                                                                                                                                                                                                                                                                                                                                                                                                                                                                                                |     |    |    |                             |                             |                             |                             |                             |                             |                             |                             |                             |                             |                             |                             |                             |                             |                             |                             |                             |                             |                             |                             |                             |
| S5b.4.1                     | Was <NAME> being breastfed at the time (her / his) fatal illness began?                                                                                                                                                                                                        | <ol style="list-style-type: none"> <li>1. Yes</li> <li>2. No</li> <li>9. Don't know</li> </ol>                                                                                                                                                                                                                                                                                                                             | <input type="checkbox"/> 1 or 9 → SQ5b.5                                                                                                                                                                                                                                                                                                                                                                                                                                                                                                                                                                                                                                                                                                                                                                                                                                                                                                                                |     |    |    |                             |                             |                             |                             |                             |                             |                             |                             |                             |                             |                             |                             |                             |                             |                             |                             |                             |                             |                             |                             |                             |
| S5b.4.2                     | How old was <NAME> when s/he was last breastfed?                                                                                                                                                                                                                               |                                                                                                                                                                                                                                                                                                                                                                                                                            | ____ Months<br>(<1 = 00; DK = 99)                                                                                                                                                                                                                                                                                                                                                                                                                                                                                                                                                                                                                                                                                                                                                                                                                                                                                                                                       |     |    |    |                             |                             |                             |                             |                             |                             |                             |                             |                             |                             |                             |                             |                             |                             |                             |                             |                             |                             |                             |                             |                             |
| S5b.5                       | At the time the fatal illness began, was <NAME> being given any other liquid, including non-human milk or formula, fruit juice, tea or water, or any solid, semisolid, or soft foods?<br><br><i>[Multiple answers allowed. Probe, and record all liquids and foods given.]</i> | <ol style="list-style-type: none"> <li>1. Non-human milk or pre-mixed formula ..</li> <li>2. Powdered formula mixed with a liquid ...</li> <li>3. Juice, water and/or water-based drinks.</li> <li>4. ORS .....</li> <li>5. Drops or syrups (vitamins, medicines)...</li> <li>6. Solid, semi-solid or soft foods.....</li> <li>7. Nothing else, <u>only</u> given breast milk .....</li> <li>9. Don't know.....</li> </ol> | <ol style="list-style-type: none"> <li>1. <input type="checkbox"/></li> <li>2. <input type="checkbox"/></li> <li>3. <input type="checkbox"/></li> <li>4. <input type="checkbox"/></li> <li>5. <input type="checkbox"/></li> <li>6. <input type="checkbox"/></li> <li>7. <input type="checkbox"/></li> <li>9. <input type="checkbox"/></li> </ol> <p style="text-align: right;">→ SQ5b.6</p> <p style="text-align: right;">→ SQ5b.6</p>                                                                                                                                                                                                                                                                                                                                                                                                                                                                                                                                  |     |    |    |                             |                             |                             |                             |                             |                             |                             |                             |                             |                             |                             |                             |                             |                             |                             |                             |                             |                             |                             |                             |                             |
| S5b.5.1                     | On most days <u>before</u> the illness began, how many <u>times</u> did <NAME> eat solid, semisolid, or soft foods other than liquids during the day or night?                                                                                                                 |                                                                                                                                                                                                                                                                                                                                                                                                                            | ____ Times<br>(DK = 99)                                                                                                                                                                                                                                                                                                                                                                                                                                                                                                                                                                                                                                                                                                                                                                                                                                                                                                                                                 |     |    |    |                             |                             |                             |                             |                             |                             |                             |                             |                             |                             |                             |                             |                             |                             |                             |                             |                             |                             |                             |                             |                             |
| S5b.5.2                     | Which of the following food types did <NAME> typically eat <u>every</u> day?<br><br><i>[Read out all options and check "Yes," "No" or "Don't know" for each.]</i>                                                                                                              | <ol style="list-style-type: none"> <li>1. Grains, roots and tubers .....</li> <li>2. Legumes and nuts.....</li> <li>3. Dairy products (milk, yogurt, cheese) ....</li> <li>4. Flesh foods (meat, fish, poultry, organs)</li> <li>5. Eggs .....</li> <li>6. Vitamin-A rich fruits and vegetables .....</li> <li>7. Other fruits and vegetables .....</li> </ol>                                                             | <table border="0"> <thead> <tr> <th>Yes</th> <th>No</th> <th>DK</th> </tr> </thead> <tbody> <tr><td>1. <input type="checkbox"/></td><td>2. <input type="checkbox"/></td><td>9. <input type="checkbox"/></td></tr> </tbody> </table> | Yes | No | DK | 1. <input type="checkbox"/> | 2. <input type="checkbox"/> | 9. <input type="checkbox"/> | 1. <input type="checkbox"/> | 2. <input type="checkbox"/> | 9. <input type="checkbox"/> | 1. <input type="checkbox"/> | 2. <input type="checkbox"/> | 9. <input type="checkbox"/> | 1. <input type="checkbox"/> | 2. <input type="checkbox"/> | 9. <input type="checkbox"/> | 1. <input type="checkbox"/> | 2. <input type="checkbox"/> | 9. <input type="checkbox"/> | 1. <input type="checkbox"/> | 2. <input type="checkbox"/> | 9. <input type="checkbox"/> | 1. <input type="checkbox"/> | 2. <input type="checkbox"/> | 9. <input type="checkbox"/> |
| Yes                         | No                                                                                                                                                                                                                                                                             | DK                                                                                                                                                                                                                                                                                                                                                                                                                         |                                                                                                                                                                                                                                                                                                                                                                                                                                                                                                                                                                                                                                                                                                                                                                                                                                                                                                                                                                         |     |    |    |                             |                             |                             |                             |                             |                             |                             |                             |                             |                             |                             |                             |                             |                             |                             |                             |                             |                             |                             |                             |                             |
| 1. <input type="checkbox"/> | 2. <input type="checkbox"/>                                                                                                                                                                                                                                                    | 9. <input type="checkbox"/>                                                                                                                                                                                                                                                                                                                                                                                                |                                                                                                                                                                                                                                                                                                                                                                                                                                                                                                                                                                                                                                                                                                                                                                                                                                                                                                                                                                         |     |    |    |                             |                             |                             |                             |                             |                             |                             |                             |                             |                             |                             |                             |                             |                             |                             |                             |                             |                             |                             |                             |                             |
| 1. <input type="checkbox"/> | 2. <input type="checkbox"/>                                                                                                                                                                                                                                                    | 9. <input type="checkbox"/>                                                                                                                                                                                                                                                                                                                                                                                                |                                                                                                                                                                                                                                                                                                                                                                                                                                                                                                                                                                                                                                                                                                                                                                                                                                                                                                                                                                         |     |    |    |                             |                             |                             |                             |                             |                             |                             |                             |                             |                             |                             |                             |                             |                             |                             |                             |                             |                             |                             |                             |                             |
| 1. <input type="checkbox"/> | 2. <input type="checkbox"/>                                                                                                                                                                                                                                                    | 9. <input type="checkbox"/>                                                                                                                                                                                                                                                                                                                                                                                                |                                                                                                                                                                                                                                                                                                                                                                                                                                                                                                                                                                                                                                                                                                                                                                                                                                                                                                                                                                         |     |    |    |                             |                             |                             |                             |                             |                             |                             |                             |                             |                             |                             |                             |                             |                             |                             |                             |                             |                             |                             |                             |                             |
| 1. <input type="checkbox"/> | 2. <input type="checkbox"/>                                                                                                                                                                                                                                                    | 9. <input type="checkbox"/>                                                                                                                                                                                                                                                                                                                                                                                                |                                                                                                                                                                                                                                                                                                                                                                                                                                                                                                                                                                                                                                                                                                                                                                                                                                                                                                                                                                         |     |    |    |                             |                             |                             |                             |                             |                             |                             |                             |                             |                             |                             |                             |                             |                             |                             |                             |                             |                             |                             |                             |                             |
| 1. <input type="checkbox"/> | 2. <input type="checkbox"/>                                                                                                                                                                                                                                                    | 9. <input type="checkbox"/>                                                                                                                                                                                                                                                                                                                                                                                                |                                                                                                                                                                                                                                                                                                                                                                                                                                                                                                                                                                                                                                                                                                                                                                                                                                                                                                                                                                         |     |    |    |                             |                             |                             |                             |                             |                             |                             |                             |                             |                             |                             |                             |                             |                             |                             |                             |                             |                             |                             |                             |                             |
| 1. <input type="checkbox"/> | 2. <input type="checkbox"/>                                                                                                                                                                                                                                                    | 9. <input type="checkbox"/>                                                                                                                                                                                                                                                                                                                                                                                                |                                                                                                                                                                                                                                                                                                                                                                                                                                                                                                                                                                                                                                                                                                                                                                                                                                                                                                                                                                         |     |    |    |                             |                             |                             |                             |                             |                             |                             |                             |                             |                             |                             |                             |                             |                             |                             |                             |                             |                             |                             |                             |                             |
| 1. <input type="checkbox"/> | 2. <input type="checkbox"/>                                                                                                                                                                                                                                                    | 9. <input type="checkbox"/>                                                                                                                                                                                                                                                                                                                                                                                                |                                                                                                                                                                                                                                                                                                                                                                                                                                                                                                                                                                                                                                                                                                                                                                                                                                                                                                                                                                         |     |    |    |                             |                             |                             |                             |                             |                             |                             |                             |                             |                             |                             |                             |                             |                             |                             |                             |                             |                             |                             |                             |                             |
| S5b.6                       | Did <NAME> drink any liquids or semi-solid foods from a bottle with a nipple or teat?                                                                                                                                                                                          | <ol style="list-style-type: none"> <li>1. Yes</li> <li>2. No</li> <li>9. Don't know</li> </ol>                                                                                                                                                                                                                                                                                                                             | <input type="checkbox"/>                                                                                                                                                                                                                                                                                                                                                                                                                                                                                                                                                                                                                                                                                                                                                                                                                                                                                                                                                |     |    |    |                             |                             |                             |                             |                             |                             |                             |                             |                             |                             |                             |                             |                             |                             |                             |                             |                             |                             |                             |                             |                             |
| S5b.7                       | Now I would like to ask about the child's vaccinations. Do you have a card where <NAME>'s vaccinations are written down?<br><br><i>If "Yes," ask: May I see it please?</i>                                                                                                     | <ol style="list-style-type: none"> <li>1. Yes, seen</li> <li>2. Yes, but not seen</li> <li>3. No card</li> </ol>                                                                                                                                                                                                                                                                                                           | <input type="checkbox"/> 2 or 3 → SQ5b.8                                                                                                                                                                                                                                                                                                                                                                                                                                                                                                                                                                                                                                                                                                                                                                                                                                                                                                                                |     |    |    |                             |                             |                             |                             |                             |                             |                             |                             |                             |                             |                             |                             |                             |                             |                             |                             |                             |                             |                             |                             |                             |

Study ID#

|                 |  |  |  |    |  |  |  |       |  |  |  |
|-----------------|--|--|--|----|--|--|--|-------|--|--|--|
|                 |  |  |  |    |  |  |  |       |  |  |  |
| Village/Cluster |  |  |  | HH |  |  |  | Child |  |  |  |

**CHILD HEALTH EPIDEMIOLOGY REFERENCE GROUP  
SB/NN/CHILD VERBAL/SOCIAL AUTOPSY QUESTIONNAIRE**

| S5b.7.                     | <p>1 Did &lt;NAME&gt; receive any vaccinations that are not included on this card, including vaccinations received in a national immunization day campaign?</p> <p><i>If "Yes," probe for vaccinations received but not recorded on the card.</i></p> <p><i>[Record 'Yes' only if BCG, Polio 0-3, Hepatitis B1-3, DPT 1-3, PENTA 1-3, Measles or Yellow Fever vaccine(s) mentioned.]</i></p> | <p>1. Yes (received BCG, Polio 0-3, DPT 1-3 or PENTA 1-3, Measles, Yellow Fever and/or Hep B1-3 vaccinations that are not recorded on the card)</p> <p>2. No</p> <p>9. Don't know</p>                                                                                                                                                                                                                                                                                                                                                                                                                                                                                                                                                                                                                                                                                                                                                                                                                                                                                                                                                                                                                                                                                                                                                                                                                                                                                                              | <p><input type="checkbox"/> 1 → Write '66' in the corresponding day column below for each vaccination received but not recorded on the card.</p> |      |       |      |  |           |  |  |  |     |                            |  |  |  |    |               |  |  |  |    |               |  |  |  |    |               |  |  |  |    |                    |  |  |  |      |                    |  |  |  |      |                    |  |  |  |      |             |  |  |  |      |             |  |  |  |      |             |  |  |  |      |              |  |  |  |      |              |  |  |  |      |              |  |  |  |      |               |  |  |  |     |                    |  |  |  |    |  |
|----------------------------|----------------------------------------------------------------------------------------------------------------------------------------------------------------------------------------------------------------------------------------------------------------------------------------------------------------------------------------------------------------------------------------------|----------------------------------------------------------------------------------------------------------------------------------------------------------------------------------------------------------------------------------------------------------------------------------------------------------------------------------------------------------------------------------------------------------------------------------------------------------------------------------------------------------------------------------------------------------------------------------------------------------------------------------------------------------------------------------------------------------------------------------------------------------------------------------------------------------------------------------------------------------------------------------------------------------------------------------------------------------------------------------------------------------------------------------------------------------------------------------------------------------------------------------------------------------------------------------------------------------------------------------------------------------------------------------------------------------------------------------------------------------------------------------------------------------------------------------------------------------------------------------------------------|--------------------------------------------------------------------------------------------------------------------------------------------------|------|-------|------|--|-----------|--|--|--|-----|----------------------------|--|--|--|----|---------------|--|--|--|----|---------------|--|--|--|----|---------------|--|--|--|----|--------------------|--|--|--|------|--------------------|--|--|--|------|--------------------|--|--|--|------|-------------|--|--|--|------|-------------|--|--|--|------|-------------|--|--|--|------|--------------|--|--|--|------|--------------|--|--|--|------|--------------|--|--|--|------|---------------|--|--|--|-----|--------------------|--|--|--|----|--|
|                            | <p><i>Copy vaccination date for each vaccine from the card. Record "99" or "9999" for partially unknown dates.</i></p> <p><i>Write '88' in 'day' column if card shows that a vaccination was given, but no date is recorded.</i></p> <p><i>Do not leave any rows blank. Record "00" in the 'day' column for each vaccination that was not given.</i></p>                                     | <table border="1" style="width: 100%; border-collapse: collapse;"> <thead> <tr> <th style="width: 60%;"></th> <th style="width: 10%;">Day</th> <th style="width: 10%;">Month</th> <th style="width: 20%;">Year</th> <th style="width: 10%;"></th> </tr> </thead> <tbody> <tr><td>BCG .....</td><td></td><td></td><td></td><td>BCG</td></tr> <tr><td>POLIO 0 (given at birth)..</td><td></td><td></td><td></td><td>P0</td></tr> <tr><td>POLIO 1 .....</td><td></td><td></td><td></td><td>P1</td></tr> <tr><td>POLIO 2 .....</td><td></td><td></td><td></td><td>P2</td></tr> <tr><td>POLIO 3 .....</td><td></td><td></td><td></td><td>P3</td></tr> <tr><td>Hepatitis B1 .....</td><td></td><td></td><td></td><td>HEP1</td></tr> <tr><td>Hepatitis B2 .....</td><td></td><td></td><td></td><td>HEP2</td></tr> <tr><td>Hepatitis B3 .....</td><td></td><td></td><td></td><td>HEP3</td></tr> <tr><td>DPT 1 .....</td><td></td><td></td><td></td><td>DPT1</td></tr> <tr><td>DPT 2 .....</td><td></td><td></td><td></td><td>DPT2</td></tr> <tr><td>DPT 3 .....</td><td></td><td></td><td></td><td>DPT3</td></tr> <tr><td>PENTA1 .....</td><td></td><td></td><td></td><td>PNT1</td></tr> <tr><td>PENTA2 .....</td><td></td><td></td><td></td><td>PNT2</td></tr> <tr><td>PENTA3 .....</td><td></td><td></td><td></td><td>PNT3</td></tr> <tr><td>MEASLES .....</td><td></td><td></td><td></td><td>MSL</td></tr> <tr><td>YELLOW FEVER .....</td><td></td><td></td><td></td><td>YF</td></tr> </tbody> </table> |                                                                                                                                                  | Day  | Month | Year |  | BCG ..... |  |  |  | BCG | POLIO 0 (given at birth).. |  |  |  | P0 | POLIO 1 ..... |  |  |  | P1 | POLIO 2 ..... |  |  |  | P2 | POLIO 3 ..... |  |  |  | P3 | Hepatitis B1 ..... |  |  |  | HEP1 | Hepatitis B2 ..... |  |  |  | HEP2 | Hepatitis B3 ..... |  |  |  | HEP3 | DPT 1 ..... |  |  |  | DPT1 | DPT 2 ..... |  |  |  | DPT2 | DPT 3 ..... |  |  |  | DPT3 | PENTA1 ..... |  |  |  | PNT1 | PENTA2 ..... |  |  |  | PNT2 | PENTA3 ..... |  |  |  | PNT3 | MEASLES ..... |  |  |  | MSL | YELLOW FEVER ..... |  |  |  | YF |  |
|                            | Day                                                                                                                                                                                                                                                                                                                                                                                          | Month                                                                                                                                                                                                                                                                                                                                                                                                                                                                                                                                                                                                                                                                                                                                                                                                                                                                                                                                                                                                                                                                                                                                                                                                                                                                                                                                                                                                                                                                                              | Year                                                                                                                                             |      |       |      |  |           |  |  |  |     |                            |  |  |  |    |               |  |  |  |    |               |  |  |  |    |               |  |  |  |    |                    |  |  |  |      |                    |  |  |  |      |                    |  |  |  |      |             |  |  |  |      |             |  |  |  |      |             |  |  |  |      |              |  |  |  |      |              |  |  |  |      |              |  |  |  |      |               |  |  |  |     |                    |  |  |  |    |  |
| BCG .....                  |                                                                                                                                                                                                                                                                                                                                                                                              |                                                                                                                                                                                                                                                                                                                                                                                                                                                                                                                                                                                                                                                                                                                                                                                                                                                                                                                                                                                                                                                                                                                                                                                                                                                                                                                                                                                                                                                                                                    |                                                                                                                                                  | BCG  |       |      |  |           |  |  |  |     |                            |  |  |  |    |               |  |  |  |    |               |  |  |  |    |               |  |  |  |    |                    |  |  |  |      |                    |  |  |  |      |                    |  |  |  |      |             |  |  |  |      |             |  |  |  |      |             |  |  |  |      |              |  |  |  |      |              |  |  |  |      |              |  |  |  |      |               |  |  |  |     |                    |  |  |  |    |  |
| POLIO 0 (given at birth).. |                                                                                                                                                                                                                                                                                                                                                                                              |                                                                                                                                                                                                                                                                                                                                                                                                                                                                                                                                                                                                                                                                                                                                                                                                                                                                                                                                                                                                                                                                                                                                                                                                                                                                                                                                                                                                                                                                                                    |                                                                                                                                                  | P0   |       |      |  |           |  |  |  |     |                            |  |  |  |    |               |  |  |  |    |               |  |  |  |    |               |  |  |  |    |                    |  |  |  |      |                    |  |  |  |      |                    |  |  |  |      |             |  |  |  |      |             |  |  |  |      |             |  |  |  |      |              |  |  |  |      |              |  |  |  |      |              |  |  |  |      |               |  |  |  |     |                    |  |  |  |    |  |
| POLIO 1 .....              |                                                                                                                                                                                                                                                                                                                                                                                              |                                                                                                                                                                                                                                                                                                                                                                                                                                                                                                                                                                                                                                                                                                                                                                                                                                                                                                                                                                                                                                                                                                                                                                                                                                                                                                                                                                                                                                                                                                    |                                                                                                                                                  | P1   |       |      |  |           |  |  |  |     |                            |  |  |  |    |               |  |  |  |    |               |  |  |  |    |               |  |  |  |    |                    |  |  |  |      |                    |  |  |  |      |                    |  |  |  |      |             |  |  |  |      |             |  |  |  |      |             |  |  |  |      |              |  |  |  |      |              |  |  |  |      |              |  |  |  |      |               |  |  |  |     |                    |  |  |  |    |  |
| POLIO 2 .....              |                                                                                                                                                                                                                                                                                                                                                                                              |                                                                                                                                                                                                                                                                                                                                                                                                                                                                                                                                                                                                                                                                                                                                                                                                                                                                                                                                                                                                                                                                                                                                                                                                                                                                                                                                                                                                                                                                                                    |                                                                                                                                                  | P2   |       |      |  |           |  |  |  |     |                            |  |  |  |    |               |  |  |  |    |               |  |  |  |    |               |  |  |  |    |                    |  |  |  |      |                    |  |  |  |      |                    |  |  |  |      |             |  |  |  |      |             |  |  |  |      |             |  |  |  |      |              |  |  |  |      |              |  |  |  |      |              |  |  |  |      |               |  |  |  |     |                    |  |  |  |    |  |
| POLIO 3 .....              |                                                                                                                                                                                                                                                                                                                                                                                              |                                                                                                                                                                                                                                                                                                                                                                                                                                                                                                                                                                                                                                                                                                                                                                                                                                                                                                                                                                                                                                                                                                                                                                                                                                                                                                                                                                                                                                                                                                    |                                                                                                                                                  | P3   |       |      |  |           |  |  |  |     |                            |  |  |  |    |               |  |  |  |    |               |  |  |  |    |               |  |  |  |    |                    |  |  |  |      |                    |  |  |  |      |                    |  |  |  |      |             |  |  |  |      |             |  |  |  |      |             |  |  |  |      |              |  |  |  |      |              |  |  |  |      |              |  |  |  |      |               |  |  |  |     |                    |  |  |  |    |  |
| Hepatitis B1 .....         |                                                                                                                                                                                                                                                                                                                                                                                              |                                                                                                                                                                                                                                                                                                                                                                                                                                                                                                                                                                                                                                                                                                                                                                                                                                                                                                                                                                                                                                                                                                                                                                                                                                                                                                                                                                                                                                                                                                    |                                                                                                                                                  | HEP1 |       |      |  |           |  |  |  |     |                            |  |  |  |    |               |  |  |  |    |               |  |  |  |    |               |  |  |  |    |                    |  |  |  |      |                    |  |  |  |      |                    |  |  |  |      |             |  |  |  |      |             |  |  |  |      |             |  |  |  |      |              |  |  |  |      |              |  |  |  |      |              |  |  |  |      |               |  |  |  |     |                    |  |  |  |    |  |
| Hepatitis B2 .....         |                                                                                                                                                                                                                                                                                                                                                                                              |                                                                                                                                                                                                                                                                                                                                                                                                                                                                                                                                                                                                                                                                                                                                                                                                                                                                                                                                                                                                                                                                                                                                                                                                                                                                                                                                                                                                                                                                                                    |                                                                                                                                                  | HEP2 |       |      |  |           |  |  |  |     |                            |  |  |  |    |               |  |  |  |    |               |  |  |  |    |               |  |  |  |    |                    |  |  |  |      |                    |  |  |  |      |                    |  |  |  |      |             |  |  |  |      |             |  |  |  |      |             |  |  |  |      |              |  |  |  |      |              |  |  |  |      |              |  |  |  |      |               |  |  |  |     |                    |  |  |  |    |  |
| Hepatitis B3 .....         |                                                                                                                                                                                                                                                                                                                                                                                              |                                                                                                                                                                                                                                                                                                                                                                                                                                                                                                                                                                                                                                                                                                                                                                                                                                                                                                                                                                                                                                                                                                                                                                                                                                                                                                                                                                                                                                                                                                    |                                                                                                                                                  | HEP3 |       |      |  |           |  |  |  |     |                            |  |  |  |    |               |  |  |  |    |               |  |  |  |    |               |  |  |  |    |                    |  |  |  |      |                    |  |  |  |      |                    |  |  |  |      |             |  |  |  |      |             |  |  |  |      |             |  |  |  |      |              |  |  |  |      |              |  |  |  |      |              |  |  |  |      |               |  |  |  |     |                    |  |  |  |    |  |
| DPT 1 .....                |                                                                                                                                                                                                                                                                                                                                                                                              |                                                                                                                                                                                                                                                                                                                                                                                                                                                                                                                                                                                                                                                                                                                                                                                                                                                                                                                                                                                                                                                                                                                                                                                                                                                                                                                                                                                                                                                                                                    |                                                                                                                                                  | DPT1 |       |      |  |           |  |  |  |     |                            |  |  |  |    |               |  |  |  |    |               |  |  |  |    |               |  |  |  |    |                    |  |  |  |      |                    |  |  |  |      |                    |  |  |  |      |             |  |  |  |      |             |  |  |  |      |             |  |  |  |      |              |  |  |  |      |              |  |  |  |      |              |  |  |  |      |               |  |  |  |     |                    |  |  |  |    |  |
| DPT 2 .....                |                                                                                                                                                                                                                                                                                                                                                                                              |                                                                                                                                                                                                                                                                                                                                                                                                                                                                                                                                                                                                                                                                                                                                                                                                                                                                                                                                                                                                                                                                                                                                                                                                                                                                                                                                                                                                                                                                                                    |                                                                                                                                                  | DPT2 |       |      |  |           |  |  |  |     |                            |  |  |  |    |               |  |  |  |    |               |  |  |  |    |               |  |  |  |    |                    |  |  |  |      |                    |  |  |  |      |                    |  |  |  |      |             |  |  |  |      |             |  |  |  |      |             |  |  |  |      |              |  |  |  |      |              |  |  |  |      |              |  |  |  |      |               |  |  |  |     |                    |  |  |  |    |  |
| DPT 3 .....                |                                                                                                                                                                                                                                                                                                                                                                                              |                                                                                                                                                                                                                                                                                                                                                                                                                                                                                                                                                                                                                                                                                                                                                                                                                                                                                                                                                                                                                                                                                                                                                                                                                                                                                                                                                                                                                                                                                                    |                                                                                                                                                  | DPT3 |       |      |  |           |  |  |  |     |                            |  |  |  |    |               |  |  |  |    |               |  |  |  |    |               |  |  |  |    |                    |  |  |  |      |                    |  |  |  |      |                    |  |  |  |      |             |  |  |  |      |             |  |  |  |      |             |  |  |  |      |              |  |  |  |      |              |  |  |  |      |              |  |  |  |      |               |  |  |  |     |                    |  |  |  |    |  |
| PENTA1 .....               |                                                                                                                                                                                                                                                                                                                                                                                              |                                                                                                                                                                                                                                                                                                                                                                                                                                                                                                                                                                                                                                                                                                                                                                                                                                                                                                                                                                                                                                                                                                                                                                                                                                                                                                                                                                                                                                                                                                    |                                                                                                                                                  | PNT1 |       |      |  |           |  |  |  |     |                            |  |  |  |    |               |  |  |  |    |               |  |  |  |    |               |  |  |  |    |                    |  |  |  |      |                    |  |  |  |      |                    |  |  |  |      |             |  |  |  |      |             |  |  |  |      |             |  |  |  |      |              |  |  |  |      |              |  |  |  |      |              |  |  |  |      |               |  |  |  |     |                    |  |  |  |    |  |
| PENTA2 .....               |                                                                                                                                                                                                                                                                                                                                                                                              |                                                                                                                                                                                                                                                                                                                                                                                                                                                                                                                                                                                                                                                                                                                                                                                                                                                                                                                                                                                                                                                                                                                                                                                                                                                                                                                                                                                                                                                                                                    |                                                                                                                                                  | PNT2 |       |      |  |           |  |  |  |     |                            |  |  |  |    |               |  |  |  |    |               |  |  |  |    |               |  |  |  |    |                    |  |  |  |      |                    |  |  |  |      |                    |  |  |  |      |             |  |  |  |      |             |  |  |  |      |             |  |  |  |      |              |  |  |  |      |              |  |  |  |      |              |  |  |  |      |               |  |  |  |     |                    |  |  |  |    |  |
| PENTA3 .....               |                                                                                                                                                                                                                                                                                                                                                                                              |                                                                                                                                                                                                                                                                                                                                                                                                                                                                                                                                                                                                                                                                                                                                                                                                                                                                                                                                                                                                                                                                                                                                                                                                                                                                                                                                                                                                                                                                                                    |                                                                                                                                                  | PNT3 |       |      |  |           |  |  |  |     |                            |  |  |  |    |               |  |  |  |    |               |  |  |  |    |               |  |  |  |    |                    |  |  |  |      |                    |  |  |  |      |                    |  |  |  |      |             |  |  |  |      |             |  |  |  |      |             |  |  |  |      |              |  |  |  |      |              |  |  |  |      |              |  |  |  |      |               |  |  |  |     |                    |  |  |  |    |  |
| MEASLES .....              |                                                                                                                                                                                                                                                                                                                                                                                              |                                                                                                                                                                                                                                                                                                                                                                                                                                                                                                                                                                                                                                                                                                                                                                                                                                                                                                                                                                                                                                                                                                                                                                                                                                                                                                                                                                                                                                                                                                    |                                                                                                                                                  | MSL  |       |      |  |           |  |  |  |     |                            |  |  |  |    |               |  |  |  |    |               |  |  |  |    |               |  |  |  |    |                    |  |  |  |      |                    |  |  |  |      |                    |  |  |  |      |             |  |  |  |      |             |  |  |  |      |             |  |  |  |      |              |  |  |  |      |              |  |  |  |      |              |  |  |  |      |               |  |  |  |     |                    |  |  |  |    |  |
| YELLOW FEVER .....         |                                                                                                                                                                                                                                                                                                                                                                                              |                                                                                                                                                                                                                                                                                                                                                                                                                                                                                                                                                                                                                                                                                                                                                                                                                                                                                                                                                                                                                                                                                                                                                                                                                                                                                                                                                                                                                                                                                                    |                                                                                                                                                  | YF   |       |      |  |           |  |  |  |     |                            |  |  |  |    |               |  |  |  |    |               |  |  |  |    |               |  |  |  |    |                    |  |  |  |      |                    |  |  |  |      |                    |  |  |  |      |             |  |  |  |      |             |  |  |  |      |             |  |  |  |      |              |  |  |  |      |              |  |  |  |      |              |  |  |  |      |               |  |  |  |     |                    |  |  |  |    |  |
| S5b.8                      | <p>Did &lt;NAME&gt; ever receive any vaccinations to prevent her/him from getting diseases, including vaccinations received in a national immunization day campaign?</p>                                                                                                                                                                                                                     | <p>1. Yes</p> <p>2. No</p> <p>9. Don't know</p>                                                                                                                                                                                                                                                                                                                                                                                                                                                                                                                                                                                                                                                                                                                                                                                                                                                                                                                                                                                                                                                                                                                                                                                                                                                                                                                                                                                                                                                    | <p><input type="checkbox"/> 2 or 9 → SQ5b.10</p>                                                                                                 |      |       |      |  |           |  |  |  |     |                            |  |  |  |    |               |  |  |  |    |               |  |  |  |    |               |  |  |  |    |                    |  |  |  |      |                    |  |  |  |      |                    |  |  |  |      |             |  |  |  |      |             |  |  |  |      |             |  |  |  |      |              |  |  |  |      |              |  |  |  |      |              |  |  |  |      |               |  |  |  |     |                    |  |  |  |    |  |
|                            | <p>Please tell me if &lt;NAME&gt; received any of the following vaccinations:</p>                                                                                                                                                                                                                                                                                                            |                                                                                                                                                                                                                                                                                                                                                                                                                                                                                                                                                                                                                                                                                                                                                                                                                                                                                                                                                                                                                                                                                                                                                                                                                                                                                                                                                                                                                                                                                                    |                                                                                                                                                  |      |       |      |  |           |  |  |  |     |                            |  |  |  |    |               |  |  |  |    |               |  |  |  |    |               |  |  |  |    |                    |  |  |  |      |                    |  |  |  |      |                    |  |  |  |      |             |  |  |  |      |             |  |  |  |      |             |  |  |  |      |              |  |  |  |      |              |  |  |  |      |              |  |  |  |      |               |  |  |  |     |                    |  |  |  |    |  |
| .1                         | <p>A BCG vaccination against tuberculosis, that is, an injection in the arm or shoulder that usually causes a scar?</p>                                                                                                                                                                                                                                                                      | <p>1. Yes</p> <p>2. No</p> <p>9. Don't know</p>                                                                                                                                                                                                                                                                                                                                                                                                                                                                                                                                                                                                                                                                                                                                                                                                                                                                                                                                                                                                                                                                                                                                                                                                                                                                                                                                                                                                                                                    | <p><input type="checkbox"/></p>                                                                                                                  |      |       |      |  |           |  |  |  |     |                            |  |  |  |    |               |  |  |  |    |               |  |  |  |    |               |  |  |  |    |                    |  |  |  |      |                    |  |  |  |      |                    |  |  |  |      |             |  |  |  |      |             |  |  |  |      |             |  |  |  |      |              |  |  |  |      |              |  |  |  |      |              |  |  |  |      |               |  |  |  |     |                    |  |  |  |    |  |
| .2                         | <p>Polio vaccine, that is, drops in the mouth?</p>                                                                                                                                                                                                                                                                                                                                           | <p>1. Yes</p> <p>2. No</p> <p>9. Don't know</p>                                                                                                                                                                                                                                                                                                                                                                                                                                                                                                                                                                                                                                                                                                                                                                                                                                                                                                                                                                                                                                                                                                                                                                                                                                                                                                                                                                                                                                                    | <p><input type="checkbox"/> 2 or 9 → SQ5b.8.5</p>                                                                                                |      |       |      |  |           |  |  |  |     |                            |  |  |  |    |               |  |  |  |    |               |  |  |  |    |               |  |  |  |    |                    |  |  |  |      |                    |  |  |  |      |                    |  |  |  |      |             |  |  |  |      |             |  |  |  |      |             |  |  |  |      |              |  |  |  |      |              |  |  |  |      |              |  |  |  |      |               |  |  |  |     |                    |  |  |  |    |  |
| .3                         | <p>When was the first polio vaccine received, just after birth or later?</p>                                                                                                                                                                                                                                                                                                                 | <p>1. Just after birth</p> <p>2. Later</p> <p>9. Don't know</p>                                                                                                                                                                                                                                                                                                                                                                                                                                                                                                                                                                                                                                                                                                                                                                                                                                                                                                                                                                                                                                                                                                                                                                                                                                                                                                                                                                                                                                    | <p><input type="checkbox"/></p>                                                                                                                  |      |       |      |  |           |  |  |  |     |                            |  |  |  |    |               |  |  |  |    |               |  |  |  |    |               |  |  |  |    |                    |  |  |  |      |                    |  |  |  |      |                    |  |  |  |      |             |  |  |  |      |             |  |  |  |      |             |  |  |  |      |              |  |  |  |      |              |  |  |  |      |              |  |  |  |      |               |  |  |  |     |                    |  |  |  |    |  |
| .4                         | <p>How many times was the polio vaccine received?</p>                                                                                                                                                                                                                                                                                                                                        |                                                                                                                                                                                                                                                                                                                                                                                                                                                                                                                                                                                                                                                                                                                                                                                                                                                                                                                                                                                                                                                                                                                                                                                                                                                                                                                                                                                                                                                                                                    | <p>_____ Times<br/>(DK = 99)</p>                                                                                                                 |      |       |      |  |           |  |  |  |     |                            |  |  |  |    |               |  |  |  |    |               |  |  |  |    |               |  |  |  |    |                    |  |  |  |      |                    |  |  |  |      |                    |  |  |  |      |             |  |  |  |      |             |  |  |  |      |             |  |  |  |      |              |  |  |  |      |              |  |  |  |      |              |  |  |  |      |               |  |  |  |     |                    |  |  |  |    |  |
| .5                         | <p>A Hep B vaccination, that is, an injection in the right thigh, sometimes given just after birth or at the same time as polio drops?</p>                                                                                                                                                                                                                                                   | <p>1. Yes</p> <p>2. No</p> <p>9. Don't know</p>                                                                                                                                                                                                                                                                                                                                                                                                                                                                                                                                                                                                                                                                                                                                                                                                                                                                                                                                                                                                                                                                                                                                                                                                                                                                                                                                                                                                                                                    | <p><input type="checkbox"/> 2 or 9 → SQ5b.8.7</p>                                                                                                |      |       |      |  |           |  |  |  |     |                            |  |  |  |    |               |  |  |  |    |               |  |  |  |    |               |  |  |  |    |                    |  |  |  |      |                    |  |  |  |      |                    |  |  |  |      |             |  |  |  |      |             |  |  |  |      |             |  |  |  |      |              |  |  |  |      |              |  |  |  |      |              |  |  |  |      |               |  |  |  |     |                    |  |  |  |    |  |

Study ID#

|                 |  |  |  |    |  |  |  |       |  |  |  |
|-----------------|--|--|--|----|--|--|--|-------|--|--|--|
|                 |  |  |  |    |  |  |  |       |  |  |  |
| Village/Cluster |  |  |  | HH |  |  |  | Child |  |  |  |

**CHILD HEALTH EPIDEMIOLOGY REFERENCE GROUP  
SB/NN/CHILD VERBAL/SOCIAL AUTOPSY QUESTIONNAIRE**

| .6                                                                                                                                                                      | How many times was a Hep B vaccination received?                                                                                                                                                                                                                     |                                                                                                                                                                                                                                                                                                                                                                                                                                                                                                                                                                                                                                                                                                                                                                                                                                                                                                                                                                                                                                                                                                                                                                                                                                                                                                                                                                                                                                                                                                                                                                                                                                                                                                                                                                                                                                                                                                                                                                                                                                                                                                                                                                                                                                                                                                                                                                                                                                                                                                                                                                                                                                                                                                                                                                                                                                                                                                                                                                                                                                                                                                                                                                                                                                                                                                                                                                                                                                                                                          |                             |                             |                             |                  |  |  |     |    |    |     |    |    |                             |                             |                             |                             |                             |                             |                                           |  |  |  |  |  |                                 |  |  |  |  |  |                             |                             |                             |                             |                             |                             |                       |  |  |  |  |  |                             |                             |                             |                             |                             |                             |                |  |  |  |  |  |                             |                             |                             |                             |                             |                             |                           |  |  |  |  |  |                             |                             |                             |                             |                             |                             |                 |  |  |  |  |  |                             |                             |                             |                             |                             |                             |                        |  |  |  |  |  |                             |                             |                             |                             |                             |                             |                       |  |  |  |  |  |                             |                             |                             |                             |                             |                             |                              |  |  |  |  |  |                             |                             |                             |                             |                             |                             |                |  |  |  |  |  |                                                                                                                                                                         |  |  |  |  |  |
|-------------------------------------------------------------------------------------------------------------------------------------------------------------------------|----------------------------------------------------------------------------------------------------------------------------------------------------------------------------------------------------------------------------------------------------------------------|------------------------------------------------------------------------------------------------------------------------------------------------------------------------------------------------------------------------------------------------------------------------------------------------------------------------------------------------------------------------------------------------------------------------------------------------------------------------------------------------------------------------------------------------------------------------------------------------------------------------------------------------------------------------------------------------------------------------------------------------------------------------------------------------------------------------------------------------------------------------------------------------------------------------------------------------------------------------------------------------------------------------------------------------------------------------------------------------------------------------------------------------------------------------------------------------------------------------------------------------------------------------------------------------------------------------------------------------------------------------------------------------------------------------------------------------------------------------------------------------------------------------------------------------------------------------------------------------------------------------------------------------------------------------------------------------------------------------------------------------------------------------------------------------------------------------------------------------------------------------------------------------------------------------------------------------------------------------------------------------------------------------------------------------------------------------------------------------------------------------------------------------------------------------------------------------------------------------------------------------------------------------------------------------------------------------------------------------------------------------------------------------------------------------------------------------------------------------------------------------------------------------------------------------------------------------------------------------------------------------------------------------------------------------------------------------------------------------------------------------------------------------------------------------------------------------------------------------------------------------------------------------------------------------------------------------------------------------------------------------------------------------------------------------------------------------------------------------------------------------------------------------------------------------------------------------------------------------------------------------------------------------------------------------------------------------------------------------------------------------------------------------------------------------------------------------------------------------------------------|-----------------------------|-----------------------------|-----------------------------|------------------|--|--|-----|----|----|-----|----|----|-----------------------------|-----------------------------|-----------------------------|-----------------------------|-----------------------------|-----------------------------|-------------------------------------------|--|--|--|--|--|---------------------------------|--|--|--|--|--|-----------------------------|-----------------------------|-----------------------------|-----------------------------|-----------------------------|-----------------------------|-----------------------|--|--|--|--|--|-----------------------------|-----------------------------|-----------------------------|-----------------------------|-----------------------------|-----------------------------|----------------|--|--|--|--|--|-----------------------------|-----------------------------|-----------------------------|-----------------------------|-----------------------------|-----------------------------|---------------------------|--|--|--|--|--|-----------------------------|-----------------------------|-----------------------------|-----------------------------|-----------------------------|-----------------------------|-----------------|--|--|--|--|--|-----------------------------|-----------------------------|-----------------------------|-----------------------------|-----------------------------|-----------------------------|------------------------|--|--|--|--|--|-----------------------------|-----------------------------|-----------------------------|-----------------------------|-----------------------------|-----------------------------|-----------------------|--|--|--|--|--|-----------------------------|-----------------------------|-----------------------------|-----------------------------|-----------------------------|-----------------------------|------------------------------|--|--|--|--|--|-----------------------------|-----------------------------|-----------------------------|-----------------------------|-----------------------------|-----------------------------|----------------|--|--|--|--|--|-------------------------------------------------------------------------------------------------------------------------------------------------------------------------|--|--|--|--|--|
|                                                                                                                                                                         |                                                                                                                                                                                                                                                                      | ____ Times<br>(DK = 99)                                                                                                                                                                                                                                                                                                                                                                                                                                                                                                                                                                                                                                                                                                                                                                                                                                                                                                                                                                                                                                                                                                                                                                                                                                                                                                                                                                                                                                                                                                                                                                                                                                                                                                                                                                                                                                                                                                                                                                                                                                                                                                                                                                                                                                                                                                                                                                                                                                                                                                                                                                                                                                                                                                                                                                                                                                                                                                                                                                                                                                                                                                                                                                                                                                                                                                                                                                                                                                                                  |                             |                             |                             |                  |  |  |     |    |    |     |    |    |                             |                             |                             |                             |                             |                             |                                           |  |  |  |  |  |                                 |  |  |  |  |  |                             |                             |                             |                             |                             |                             |                       |  |  |  |  |  |                             |                             |                             |                             |                             |                             |                |  |  |  |  |  |                             |                             |                             |                             |                             |                             |                           |  |  |  |  |  |                             |                             |                             |                             |                             |                             |                 |  |  |  |  |  |                             |                             |                             |                             |                             |                             |                        |  |  |  |  |  |                             |                             |                             |                             |                             |                             |                       |  |  |  |  |  |                             |                             |                             |                             |                             |                             |                              |  |  |  |  |  |                             |                             |                             |                             |                             |                             |                |  |  |  |  |  |                                                                                                                                                                         |  |  |  |  |  |
| .7                                                                                                                                                                      | A DPT vaccination, that is, an injection in the thighs or buttocks, sometimes given at the same time as polio drops or a Hep B vaccination?                                                                                                                          | 1. Yes<br>2. No<br>9. Don't know<br><br><input type="checkbox"/> <b>2 or 9 → SQ5b.8.9</b>                                                                                                                                                                                                                                                                                                                                                                                                                                                                                                                                                                                                                                                                                                                                                                                                                                                                                                                                                                                                                                                                                                                                                                                                                                                                                                                                                                                                                                                                                                                                                                                                                                                                                                                                                                                                                                                                                                                                                                                                                                                                                                                                                                                                                                                                                                                                                                                                                                                                                                                                                                                                                                                                                                                                                                                                                                                                                                                                                                                                                                                                                                                                                                                                                                                                                                                                                                                                |                             |                             |                             |                  |  |  |     |    |    |     |    |    |                             |                             |                             |                             |                             |                             |                                           |  |  |  |  |  |                                 |  |  |  |  |  |                             |                             |                             |                             |                             |                             |                       |  |  |  |  |  |                             |                             |                             |                             |                             |                             |                |  |  |  |  |  |                             |                             |                             |                             |                             |                             |                           |  |  |  |  |  |                             |                             |                             |                             |                             |                             |                 |  |  |  |  |  |                             |                             |                             |                             |                             |                             |                        |  |  |  |  |  |                             |                             |                             |                             |                             |                             |                       |  |  |  |  |  |                             |                             |                             |                             |                             |                             |                              |  |  |  |  |  |                             |                             |                             |                             |                             |                             |                |  |  |  |  |  |                                                                                                                                                                         |  |  |  |  |  |
| .8                                                                                                                                                                      | How many times was a DPT vaccination received?                                                                                                                                                                                                                       | ____ Times<br>(DK = 99)                                                                                                                                                                                                                                                                                                                                                                                                                                                                                                                                                                                                                                                                                                                                                                                                                                                                                                                                                                                                                                                                                                                                                                                                                                                                                                                                                                                                                                                                                                                                                                                                                                                                                                                                                                                                                                                                                                                                                                                                                                                                                                                                                                                                                                                                                                                                                                                                                                                                                                                                                                                                                                                                                                                                                                                                                                                                                                                                                                                                                                                                                                                                                                                                                                                                                                                                                                                                                                                                  |                             |                             |                             |                  |  |  |     |    |    |     |    |    |                             |                             |                             |                             |                             |                             |                                           |  |  |  |  |  |                                 |  |  |  |  |  |                             |                             |                             |                             |                             |                             |                       |  |  |  |  |  |                             |                             |                             |                             |                             |                             |                |  |  |  |  |  |                             |                             |                             |                             |                             |                             |                           |  |  |  |  |  |                             |                             |                             |                             |                             |                             |                 |  |  |  |  |  |                             |                             |                             |                             |                             |                             |                        |  |  |  |  |  |                             |                             |                             |                             |                             |                             |                       |  |  |  |  |  |                             |                             |                             |                             |                             |                             |                              |  |  |  |  |  |                             |                             |                             |                             |                             |                             |                |  |  |  |  |  |                                                                                                                                                                         |  |  |  |  |  |
| .9                                                                                                                                                                      | A PENTA vaccination, that is, an injection in the thighs or buttocks instead of a Hep B or DPT vaccination, sometimes given at the same time as polio drops?                                                                                                         | 1. Yes<br>2. No<br>9. Don't know<br><br><input type="checkbox"/> <b>2 or 9 → SQ5b.8.11</b>                                                                                                                                                                                                                                                                                                                                                                                                                                                                                                                                                                                                                                                                                                                                                                                                                                                                                                                                                                                                                                                                                                                                                                                                                                                                                                                                                                                                                                                                                                                                                                                                                                                                                                                                                                                                                                                                                                                                                                                                                                                                                                                                                                                                                                                                                                                                                                                                                                                                                                                                                                                                                                                                                                                                                                                                                                                                                                                                                                                                                                                                                                                                                                                                                                                                                                                                                                                               |                             |                             |                             |                  |  |  |     |    |    |     |    |    |                             |                             |                             |                             |                             |                             |                                           |  |  |  |  |  |                                 |  |  |  |  |  |                             |                             |                             |                             |                             |                             |                       |  |  |  |  |  |                             |                             |                             |                             |                             |                             |                |  |  |  |  |  |                             |                             |                             |                             |                             |                             |                           |  |  |  |  |  |                             |                             |                             |                             |                             |                             |                 |  |  |  |  |  |                             |                             |                             |                             |                             |                             |                        |  |  |  |  |  |                             |                             |                             |                             |                             |                             |                       |  |  |  |  |  |                             |                             |                             |                             |                             |                             |                              |  |  |  |  |  |                             |                             |                             |                             |                             |                             |                |  |  |  |  |  |                                                                                                                                                                         |  |  |  |  |  |
| .10                                                                                                                                                                     | How many times was a PENTA vaccination received?                                                                                                                                                                                                                     | ____ Times<br>(DK = 99)                                                                                                                                                                                                                                                                                                                                                                                                                                                                                                                                                                                                                                                                                                                                                                                                                                                                                                                                                                                                                                                                                                                                                                                                                                                                                                                                                                                                                                                                                                                                                                                                                                                                                                                                                                                                                                                                                                                                                                                                                                                                                                                                                                                                                                                                                                                                                                                                                                                                                                                                                                                                                                                                                                                                                                                                                                                                                                                                                                                                                                                                                                                                                                                                                                                                                                                                                                                                                                                                  |                             |                             |                             |                  |  |  |     |    |    |     |    |    |                             |                             |                             |                             |                             |                             |                                           |  |  |  |  |  |                                 |  |  |  |  |  |                             |                             |                             |                             |                             |                             |                       |  |  |  |  |  |                             |                             |                             |                             |                             |                             |                |  |  |  |  |  |                             |                             |                             |                             |                             |                             |                           |  |  |  |  |  |                             |                             |                             |                             |                             |                             |                 |  |  |  |  |  |                             |                             |                             |                             |                             |                             |                        |  |  |  |  |  |                             |                             |                             |                             |                             |                             |                       |  |  |  |  |  |                             |                             |                             |                             |                             |                             |                              |  |  |  |  |  |                             |                             |                             |                             |                             |                             |                |  |  |  |  |  |                                                                                                                                                                         |  |  |  |  |  |
| .11                                                                                                                                                                     | A measles or MMR injection, that is, a shot in the arm at the age of 9 months or older, to prevent measles?                                                                                                                                                          | <input type="checkbox"/>                                                                                                                                                                                                                                                                                                                                                                                                                                                                                                                                                                                                                                                                                                                                                                                                                                                                                                                                                                                                                                                                                                                                                                                                                                                                                                                                                                                                                                                                                                                                                                                                                                                                                                                                                                                                                                                                                                                                                                                                                                                                                                                                                                                                                                                                                                                                                                                                                                                                                                                                                                                                                                                                                                                                                                                                                                                                                                                                                                                                                                                                                                                                                                                                                                                                                                                                                                                                                                                                 |                             |                             |                             |                  |  |  |     |    |    |     |    |    |                             |                             |                             |                             |                             |                             |                                           |  |  |  |  |  |                                 |  |  |  |  |  |                             |                             |                             |                             |                             |                             |                       |  |  |  |  |  |                             |                             |                             |                             |                             |                             |                |  |  |  |  |  |                             |                             |                             |                             |                             |                             |                           |  |  |  |  |  |                             |                             |                             |                             |                             |                             |                 |  |  |  |  |  |                             |                             |                             |                             |                             |                             |                        |  |  |  |  |  |                             |                             |                             |                             |                             |                             |                       |  |  |  |  |  |                             |                             |                             |                             |                             |                             |                              |  |  |  |  |  |                             |                             |                             |                             |                             |                             |                |  |  |  |  |  |                                                                                                                                                                         |  |  |  |  |  |
| .12                                                                                                                                                                     | A yellow fever vaccination, that is, an injection given in the arm after the child is 9 months old?                                                                                                                                                                  | <input type="checkbox"/>                                                                                                                                                                                                                                                                                                                                                                                                                                                                                                                                                                                                                                                                                                                                                                                                                                                                                                                                                                                                                                                                                                                                                                                                                                                                                                                                                                                                                                                                                                                                                                                                                                                                                                                                                                                                                                                                                                                                                                                                                                                                                                                                                                                                                                                                                                                                                                                                                                                                                                                                                                                                                                                                                                                                                                                                                                                                                                                                                                                                                                                                                                                                                                                                                                                                                                                                                                                                                                                                 |                             |                             |                             |                  |  |  |     |    |    |     |    |    |                             |                             |                             |                             |                             |                             |                                           |  |  |  |  |  |                                 |  |  |  |  |  |                             |                             |                             |                             |                             |                             |                       |  |  |  |  |  |                             |                             |                             |                             |                             |                             |                |  |  |  |  |  |                             |                             |                             |                             |                             |                             |                           |  |  |  |  |  |                             |                             |                             |                             |                             |                             |                 |  |  |  |  |  |                             |                             |                             |                             |                             |                             |                        |  |  |  |  |  |                             |                             |                             |                             |                             |                             |                       |  |  |  |  |  |                             |                             |                             |                             |                             |                             |                              |  |  |  |  |  |                             |                             |                             |                             |                             |                             |                |  |  |  |  |  |                                                                                                                                                                         |  |  |  |  |  |
| S5b.9                                                                                                                                                                   | Were any of the vaccinations <NAME> received given as part of a national immunization day campaign?                                                                                                                                                                  | 1. Yes<br>2. No<br>9. Don't know<br><br><input type="checkbox"/> <b>2 or 9 → SQ5b.10</b>                                                                                                                                                                                                                                                                                                                                                                                                                                                                                                                                                                                                                                                                                                                                                                                                                                                                                                                                                                                                                                                                                                                                                                                                                                                                                                                                                                                                                                                                                                                                                                                                                                                                                                                                                                                                                                                                                                                                                                                                                                                                                                                                                                                                                                                                                                                                                                                                                                                                                                                                                                                                                                                                                                                                                                                                                                                                                                                                                                                                                                                                                                                                                                                                                                                                                                                                                                                                 |                             |                             |                             |                  |  |  |     |    |    |     |    |    |                             |                             |                             |                             |                             |                             |                                           |  |  |  |  |  |                                 |  |  |  |  |  |                             |                             |                             |                             |                             |                             |                       |  |  |  |  |  |                             |                             |                             |                             |                             |                             |                |  |  |  |  |  |                             |                             |                             |                             |                             |                             |                           |  |  |  |  |  |                             |                             |                             |                             |                             |                             |                 |  |  |  |  |  |                             |                             |                             |                             |                             |                             |                        |  |  |  |  |  |                             |                             |                             |                             |                             |                             |                       |  |  |  |  |  |                             |                             |                             |                             |                             |                             |                              |  |  |  |  |  |                             |                             |                             |                             |                             |                             |                |  |  |  |  |  |                                                                                                                                                                         |  |  |  |  |  |
| S5b.9.1                                                                                                                                                                 | At which national immunization day campaigns did <NAME> receive vaccinations?                                                                                                                                                                                        | 1. <input type="checkbox"/>                                                                                                                                                                                                                                                                                                                                                                                                                                                                                                                                                                                                                                                                                                                                                                                                                                                                                                                                                                                                                                                                                                                                                                                                                                                                                                                                                                                                                                                                                                                                                                                                                                                                                                                                                                                                                                                                                                                                                                                                                                                                                                                                                                                                                                                                                                                                                                                                                                                                                                                                                                                                                                                                                                                                                                                                                                                                                                                                                                                                                                                                                                                                                                                                                                                                                                                                                                                                                                                              |                             |                             |                             |                  |  |  |     |    |    |     |    |    |                             |                             |                             |                             |                             |                             |                                           |  |  |  |  |  |                                 |  |  |  |  |  |                             |                             |                             |                             |                             |                             |                       |  |  |  |  |  |                             |                             |                             |                             |                             |                             |                |  |  |  |  |  |                             |                             |                             |                             |                             |                             |                           |  |  |  |  |  |                             |                             |                             |                             |                             |                             |                 |  |  |  |  |  |                             |                             |                             |                             |                             |                             |                        |  |  |  |  |  |                             |                             |                             |                             |                             |                             |                       |  |  |  |  |  |                             |                             |                             |                             |                             |                             |                              |  |  |  |  |  |                             |                             |                             |                             |                             |                             |                |  |  |  |  |  |                                                                                                                                                                         |  |  |  |  |  |
| S5b.10                                                                                                                                                                  | (Before / In the six months before) the fatal illness, did <NAME> receive one or more vitamin A doses like this?<br><br><i>[Read "Before..." if the child lived less than 6 months.]</i><br><br><i>[Show ampoule/capsule/syrup]</i>                                  | <input type="checkbox"/>                                                                                                                                                                                                                                                                                                                                                                                                                                                                                                                                                                                                                                                                                                                                                                                                                                                                                                                                                                                                                                                                                                                                                                                                                                                                                                                                                                                                                                                                                                                                                                                                                                                                                                                                                                                                                                                                                                                                                                                                                                                                                                                                                                                                                                                                                                                                                                                                                                                                                                                                                                                                                                                                                                                                                                                                                                                                                                                                                                                                                                                                                                                                                                                                                                                                                                                                                                                                                                                                 |                             |                             |                             |                  |  |  |     |    |    |     |    |    |                             |                             |                             |                             |                             |                             |                                           |  |  |  |  |  |                                 |  |  |  |  |  |                             |                             |                             |                             |                             |                             |                       |  |  |  |  |  |                             |                             |                             |                             |                             |                             |                |  |  |  |  |  |                             |                             |                             |                             |                             |                             |                           |  |  |  |  |  |                             |                             |                             |                             |                             |                             |                 |  |  |  |  |  |                             |                             |                             |                             |                             |                             |                        |  |  |  |  |  |                             |                             |                             |                             |                             |                             |                       |  |  |  |  |  |                             |                             |                             |                             |                             |                             |                              |  |  |  |  |  |                             |                             |                             |                             |                             |                             |                |  |  |  |  |  |                                                                                                                                                                         |  |  |  |  |  |
| S5b.11                                                                                                                                                                  | Before the fatal illness began, did <NAME> suffer from any of the following known conditions:<br><br><i>[Read out all conditions and check "Yes," "No" or "Don't know" for each.]</i><br><br>If "Yes," then ask: Was s/he provided any treatment for this condition? | <table border="0" style="width: 100%; border-collapse: collapse;"> <thead> <tr> <th colspan="3" style="text-align: left;"><u>Suffered from</u></th> <th colspan="3" style="text-align: left;"><u>Treatment</u></th> </tr> <tr> <th style="text-align: left;">Yes</th> <th style="text-align: left;">No</th> <th style="text-align: left;">DK</th> <th style="text-align: left;">Yes</th> <th style="text-align: left;">No</th> <th style="text-align: left;">DK</th> </tr> </thead> <tbody> <tr> <td>1. <input type="checkbox"/></td> <td>2. <input type="checkbox"/></td> <td>9. <input type="checkbox"/></td> <td>1. <input type="checkbox"/></td> <td>2. <input type="checkbox"/></td> <td>9. <input type="checkbox"/></td> </tr> <tr> <td colspan="6">2. Malformation (from the time of birth):</td> </tr> <tr> <td colspan="6">a. Head, neck and/or back .....</td> </tr> <tr> <td>1. <input type="checkbox"/></td> <td>2. <input type="checkbox"/></td> <td>9. <input type="checkbox"/></td> <td>1. <input type="checkbox"/></td> <td>2. <input type="checkbox"/></td> <td>9. <input type="checkbox"/></td> </tr> <tr> <td colspan="6">b. Mouth/palate .....</td> </tr> <tr> <td>1. <input type="checkbox"/></td> <td>2. <input type="checkbox"/></td> <td>9. <input type="checkbox"/></td> <td>1. <input type="checkbox"/></td> <td>2. <input type="checkbox"/></td> <td>9. <input type="checkbox"/></td> </tr> <tr> <td colspan="6">c. Heart .....</td> </tr> <tr> <td>1. <input type="checkbox"/></td> <td>2. <input type="checkbox"/></td> <td>9. <input type="checkbox"/></td> <td>1. <input type="checkbox"/></td> <td>2. <input type="checkbox"/></td> <td>9. <input type="checkbox"/></td> </tr> <tr> <td colspan="6">d. Arms and/or legs .....</td> </tr> <tr> <td>1. <input type="checkbox"/></td> <td>2. <input type="checkbox"/></td> <td>9. <input type="checkbox"/></td> <td>1. <input type="checkbox"/></td> <td>2. <input type="checkbox"/></td> <td>9. <input type="checkbox"/></td> </tr> <tr> <td colspan="6">3. Asthma .....</td> </tr> <tr> <td>1. <input type="checkbox"/></td> <td>2. <input type="checkbox"/></td> <td>9. <input type="checkbox"/></td> <td>1. <input type="checkbox"/></td> <td>2. <input type="checkbox"/></td> <td>9. <input type="checkbox"/></td> </tr> <tr> <td colspan="6">4. Heart disease .....</td> </tr> <tr> <td>1. <input type="checkbox"/></td> <td>2. <input type="checkbox"/></td> <td>9. <input type="checkbox"/></td> <td>1. <input type="checkbox"/></td> <td>2. <input type="checkbox"/></td> <td>9. <input type="checkbox"/></td> </tr> <tr> <td colspan="6">5. Tuberculosis .....</td> </tr> <tr> <td>1. <input type="checkbox"/></td> <td>2. <input type="checkbox"/></td> <td>9. <input type="checkbox"/></td> <td>1. <input type="checkbox"/></td> <td>2. <input type="checkbox"/></td> <td>9. <input type="checkbox"/></td> </tr> <tr> <td colspan="6">6. Epilepsy/convulsion .....</td> </tr> <tr> <td>1. <input type="checkbox"/></td> <td>2. <input type="checkbox"/></td> <td>9. <input type="checkbox"/></td> <td>1. <input type="checkbox"/></td> <td>2. <input type="checkbox"/></td> <td>9. <input type="checkbox"/></td> </tr> <tr> <td colspan="6">7. Other .....</td> </tr> <tr> <td colspan="6">1. <input type="checkbox"/> 2. <input type="checkbox"/> 9. <input type="checkbox"/> 1. <input type="checkbox"/> 2. <input type="checkbox"/> 9. <input type="checkbox"/></td> </tr> </tbody> </table> | <u>Suffered from</u>        |                             |                             | <u>Treatment</u> |  |  | Yes | No | DK | Yes | No | DK | 1. <input type="checkbox"/> | 2. <input type="checkbox"/> | 9. <input type="checkbox"/> | 1. <input type="checkbox"/> | 2. <input type="checkbox"/> | 9. <input type="checkbox"/> | 2. Malformation (from the time of birth): |  |  |  |  |  | a. Head, neck and/or back ..... |  |  |  |  |  | 1. <input type="checkbox"/> | 2. <input type="checkbox"/> | 9. <input type="checkbox"/> | 1. <input type="checkbox"/> | 2. <input type="checkbox"/> | 9. <input type="checkbox"/> | b. Mouth/palate ..... |  |  |  |  |  | 1. <input type="checkbox"/> | 2. <input type="checkbox"/> | 9. <input type="checkbox"/> | 1. <input type="checkbox"/> | 2. <input type="checkbox"/> | 9. <input type="checkbox"/> | c. Heart ..... |  |  |  |  |  | 1. <input type="checkbox"/> | 2. <input type="checkbox"/> | 9. <input type="checkbox"/> | 1. <input type="checkbox"/> | 2. <input type="checkbox"/> | 9. <input type="checkbox"/> | d. Arms and/or legs ..... |  |  |  |  |  | 1. <input type="checkbox"/> | 2. <input type="checkbox"/> | 9. <input type="checkbox"/> | 1. <input type="checkbox"/> | 2. <input type="checkbox"/> | 9. <input type="checkbox"/> | 3. Asthma ..... |  |  |  |  |  | 1. <input type="checkbox"/> | 2. <input type="checkbox"/> | 9. <input type="checkbox"/> | 1. <input type="checkbox"/> | 2. <input type="checkbox"/> | 9. <input type="checkbox"/> | 4. Heart disease ..... |  |  |  |  |  | 1. <input type="checkbox"/> | 2. <input type="checkbox"/> | 9. <input type="checkbox"/> | 1. <input type="checkbox"/> | 2. <input type="checkbox"/> | 9. <input type="checkbox"/> | 5. Tuberculosis ..... |  |  |  |  |  | 1. <input type="checkbox"/> | 2. <input type="checkbox"/> | 9. <input type="checkbox"/> | 1. <input type="checkbox"/> | 2. <input type="checkbox"/> | 9. <input type="checkbox"/> | 6. Epilepsy/convulsion ..... |  |  |  |  |  | 1. <input type="checkbox"/> | 2. <input type="checkbox"/> | 9. <input type="checkbox"/> | 1. <input type="checkbox"/> | 2. <input type="checkbox"/> | 9. <input type="checkbox"/> | 7. Other ..... |  |  |  |  |  | 1. <input type="checkbox"/> 2. <input type="checkbox"/> 9. <input type="checkbox"/> 1. <input type="checkbox"/> 2. <input type="checkbox"/> 9. <input type="checkbox"/> |  |  |  |  |  |
| <u>Suffered from</u>                                                                                                                                                    |                                                                                                                                                                                                                                                                      |                                                                                                                                                                                                                                                                                                                                                                                                                                                                                                                                                                                                                                                                                                                                                                                                                                                                                                                                                                                                                                                                                                                                                                                                                                                                                                                                                                                                                                                                                                                                                                                                                                                                                                                                                                                                                                                                                                                                                                                                                                                                                                                                                                                                                                                                                                                                                                                                                                                                                                                                                                                                                                                                                                                                                                                                                                                                                                                                                                                                                                                                                                                                                                                                                                                                                                                                                                                                                                                                                          | <u>Treatment</u>            |                             |                             |                  |  |  |     |    |    |     |    |    |                             |                             |                             |                             |                             |                             |                                           |  |  |  |  |  |                                 |  |  |  |  |  |                             |                             |                             |                             |                             |                             |                       |  |  |  |  |  |                             |                             |                             |                             |                             |                             |                |  |  |  |  |  |                             |                             |                             |                             |                             |                             |                           |  |  |  |  |  |                             |                             |                             |                             |                             |                             |                 |  |  |  |  |  |                             |                             |                             |                             |                             |                             |                        |  |  |  |  |  |                             |                             |                             |                             |                             |                             |                       |  |  |  |  |  |                             |                             |                             |                             |                             |                             |                              |  |  |  |  |  |                             |                             |                             |                             |                             |                             |                |  |  |  |  |  |                                                                                                                                                                         |  |  |  |  |  |
| Yes                                                                                                                                                                     | No                                                                                                                                                                                                                                                                   | DK                                                                                                                                                                                                                                                                                                                                                                                                                                                                                                                                                                                                                                                                                                                                                                                                                                                                                                                                                                                                                                                                                                                                                                                                                                                                                                                                                                                                                                                                                                                                                                                                                                                                                                                                                                                                                                                                                                                                                                                                                                                                                                                                                                                                                                                                                                                                                                                                                                                                                                                                                                                                                                                                                                                                                                                                                                                                                                                                                                                                                                                                                                                                                                                                                                                                                                                                                                                                                                                                                       | Yes                         | No                          | DK                          |                  |  |  |     |    |    |     |    |    |                             |                             |                             |                             |                             |                             |                                           |  |  |  |  |  |                                 |  |  |  |  |  |                             |                             |                             |                             |                             |                             |                       |  |  |  |  |  |                             |                             |                             |                             |                             |                             |                |  |  |  |  |  |                             |                             |                             |                             |                             |                             |                           |  |  |  |  |  |                             |                             |                             |                             |                             |                             |                 |  |  |  |  |  |                             |                             |                             |                             |                             |                             |                        |  |  |  |  |  |                             |                             |                             |                             |                             |                             |                       |  |  |  |  |  |                             |                             |                             |                             |                             |                             |                              |  |  |  |  |  |                             |                             |                             |                             |                             |                             |                |  |  |  |  |  |                                                                                                                                                                         |  |  |  |  |  |
| 1. <input type="checkbox"/>                                                                                                                                             | 2. <input type="checkbox"/>                                                                                                                                                                                                                                          | 9. <input type="checkbox"/>                                                                                                                                                                                                                                                                                                                                                                                                                                                                                                                                                                                                                                                                                                                                                                                                                                                                                                                                                                                                                                                                                                                                                                                                                                                                                                                                                                                                                                                                                                                                                                                                                                                                                                                                                                                                                                                                                                                                                                                                                                                                                                                                                                                                                                                                                                                                                                                                                                                                                                                                                                                                                                                                                                                                                                                                                                                                                                                                                                                                                                                                                                                                                                                                                                                                                                                                                                                                                                                              | 1. <input type="checkbox"/> | 2. <input type="checkbox"/> | 9. <input type="checkbox"/> |                  |  |  |     |    |    |     |    |    |                             |                             |                             |                             |                             |                             |                                           |  |  |  |  |  |                                 |  |  |  |  |  |                             |                             |                             |                             |                             |                             |                       |  |  |  |  |  |                             |                             |                             |                             |                             |                             |                |  |  |  |  |  |                             |                             |                             |                             |                             |                             |                           |  |  |  |  |  |                             |                             |                             |                             |                             |                             |                 |  |  |  |  |  |                             |                             |                             |                             |                             |                             |                        |  |  |  |  |  |                             |                             |                             |                             |                             |                             |                       |  |  |  |  |  |                             |                             |                             |                             |                             |                             |                              |  |  |  |  |  |                             |                             |                             |                             |                             |                             |                |  |  |  |  |  |                                                                                                                                                                         |  |  |  |  |  |
| 2. Malformation (from the time of birth):                                                                                                                               |                                                                                                                                                                                                                                                                      |                                                                                                                                                                                                                                                                                                                                                                                                                                                                                                                                                                                                                                                                                                                                                                                                                                                                                                                                                                                                                                                                                                                                                                                                                                                                                                                                                                                                                                                                                                                                                                                                                                                                                                                                                                                                                                                                                                                                                                                                                                                                                                                                                                                                                                                                                                                                                                                                                                                                                                                                                                                                                                                                                                                                                                                                                                                                                                                                                                                                                                                                                                                                                                                                                                                                                                                                                                                                                                                                                          |                             |                             |                             |                  |  |  |     |    |    |     |    |    |                             |                             |                             |                             |                             |                             |                                           |  |  |  |  |  |                                 |  |  |  |  |  |                             |                             |                             |                             |                             |                             |                       |  |  |  |  |  |                             |                             |                             |                             |                             |                             |                |  |  |  |  |  |                             |                             |                             |                             |                             |                             |                           |  |  |  |  |  |                             |                             |                             |                             |                             |                             |                 |  |  |  |  |  |                             |                             |                             |                             |                             |                             |                        |  |  |  |  |  |                             |                             |                             |                             |                             |                             |                       |  |  |  |  |  |                             |                             |                             |                             |                             |                             |                              |  |  |  |  |  |                             |                             |                             |                             |                             |                             |                |  |  |  |  |  |                                                                                                                                                                         |  |  |  |  |  |
| a. Head, neck and/or back .....                                                                                                                                         |                                                                                                                                                                                                                                                                      |                                                                                                                                                                                                                                                                                                                                                                                                                                                                                                                                                                                                                                                                                                                                                                                                                                                                                                                                                                                                                                                                                                                                                                                                                                                                                                                                                                                                                                                                                                                                                                                                                                                                                                                                                                                                                                                                                                                                                                                                                                                                                                                                                                                                                                                                                                                                                                                                                                                                                                                                                                                                                                                                                                                                                                                                                                                                                                                                                                                                                                                                                                                                                                                                                                                                                                                                                                                                                                                                                          |                             |                             |                             |                  |  |  |     |    |    |     |    |    |                             |                             |                             |                             |                             |                             |                                           |  |  |  |  |  |                                 |  |  |  |  |  |                             |                             |                             |                             |                             |                             |                       |  |  |  |  |  |                             |                             |                             |                             |                             |                             |                |  |  |  |  |  |                             |                             |                             |                             |                             |                             |                           |  |  |  |  |  |                             |                             |                             |                             |                             |                             |                 |  |  |  |  |  |                             |                             |                             |                             |                             |                             |                        |  |  |  |  |  |                             |                             |                             |                             |                             |                             |                       |  |  |  |  |  |                             |                             |                             |                             |                             |                             |                              |  |  |  |  |  |                             |                             |                             |                             |                             |                             |                |  |  |  |  |  |                                                                                                                                                                         |  |  |  |  |  |
| 1. <input type="checkbox"/>                                                                                                                                             | 2. <input type="checkbox"/>                                                                                                                                                                                                                                          | 9. <input type="checkbox"/>                                                                                                                                                                                                                                                                                                                                                                                                                                                                                                                                                                                                                                                                                                                                                                                                                                                                                                                                                                                                                                                                                                                                                                                                                                                                                                                                                                                                                                                                                                                                                                                                                                                                                                                                                                                                                                                                                                                                                                                                                                                                                                                                                                                                                                                                                                                                                                                                                                                                                                                                                                                                                                                                                                                                                                                                                                                                                                                                                                                                                                                                                                                                                                                                                                                                                                                                                                                                                                                              | 1. <input type="checkbox"/> | 2. <input type="checkbox"/> | 9. <input type="checkbox"/> |                  |  |  |     |    |    |     |    |    |                             |                             |                             |                             |                             |                             |                                           |  |  |  |  |  |                                 |  |  |  |  |  |                             |                             |                             |                             |                             |                             |                       |  |  |  |  |  |                             |                             |                             |                             |                             |                             |                |  |  |  |  |  |                             |                             |                             |                             |                             |                             |                           |  |  |  |  |  |                             |                             |                             |                             |                             |                             |                 |  |  |  |  |  |                             |                             |                             |                             |                             |                             |                        |  |  |  |  |  |                             |                             |                             |                             |                             |                             |                       |  |  |  |  |  |                             |                             |                             |                             |                             |                             |                              |  |  |  |  |  |                             |                             |                             |                             |                             |                             |                |  |  |  |  |  |                                                                                                                                                                         |  |  |  |  |  |
| b. Mouth/palate .....                                                                                                                                                   |                                                                                                                                                                                                                                                                      |                                                                                                                                                                                                                                                                                                                                                                                                                                                                                                                                                                                                                                                                                                                                                                                                                                                                                                                                                                                                                                                                                                                                                                                                                                                                                                                                                                                                                                                                                                                                                                                                                                                                                                                                                                                                                                                                                                                                                                                                                                                                                                                                                                                                                                                                                                                                                                                                                                                                                                                                                                                                                                                                                                                                                                                                                                                                                                                                                                                                                                                                                                                                                                                                                                                                                                                                                                                                                                                                                          |                             |                             |                             |                  |  |  |     |    |    |     |    |    |                             |                             |                             |                             |                             |                             |                                           |  |  |  |  |  |                                 |  |  |  |  |  |                             |                             |                             |                             |                             |                             |                       |  |  |  |  |  |                             |                             |                             |                             |                             |                             |                |  |  |  |  |  |                             |                             |                             |                             |                             |                             |                           |  |  |  |  |  |                             |                             |                             |                             |                             |                             |                 |  |  |  |  |  |                             |                             |                             |                             |                             |                             |                        |  |  |  |  |  |                             |                             |                             |                             |                             |                             |                       |  |  |  |  |  |                             |                             |                             |                             |                             |                             |                              |  |  |  |  |  |                             |                             |                             |                             |                             |                             |                |  |  |  |  |  |                                                                                                                                                                         |  |  |  |  |  |
| 1. <input type="checkbox"/>                                                                                                                                             | 2. <input type="checkbox"/>                                                                                                                                                                                                                                          | 9. <input type="checkbox"/>                                                                                                                                                                                                                                                                                                                                                                                                                                                                                                                                                                                                                                                                                                                                                                                                                                                                                                                                                                                                                                                                                                                                                                                                                                                                                                                                                                                                                                                                                                                                                                                                                                                                                                                                                                                                                                                                                                                                                                                                                                                                                                                                                                                                                                                                                                                                                                                                                                                                                                                                                                                                                                                                                                                                                                                                                                                                                                                                                                                                                                                                                                                                                                                                                                                                                                                                                                                                                                                              | 1. <input type="checkbox"/> | 2. <input type="checkbox"/> | 9. <input type="checkbox"/> |                  |  |  |     |    |    |     |    |    |                             |                             |                             |                             |                             |                             |                                           |  |  |  |  |  |                                 |  |  |  |  |  |                             |                             |                             |                             |                             |                             |                       |  |  |  |  |  |                             |                             |                             |                             |                             |                             |                |  |  |  |  |  |                             |                             |                             |                             |                             |                             |                           |  |  |  |  |  |                             |                             |                             |                             |                             |                             |                 |  |  |  |  |  |                             |                             |                             |                             |                             |                             |                        |  |  |  |  |  |                             |                             |                             |                             |                             |                             |                       |  |  |  |  |  |                             |                             |                             |                             |                             |                             |                              |  |  |  |  |  |                             |                             |                             |                             |                             |                             |                |  |  |  |  |  |                                                                                                                                                                         |  |  |  |  |  |
| c. Heart .....                                                                                                                                                          |                                                                                                                                                                                                                                                                      |                                                                                                                                                                                                                                                                                                                                                                                                                                                                                                                                                                                                                                                                                                                                                                                                                                                                                                                                                                                                                                                                                                                                                                                                                                                                                                                                                                                                                                                                                                                                                                                                                                                                                                                                                                                                                                                                                                                                                                                                                                                                                                                                                                                                                                                                                                                                                                                                                                                                                                                                                                                                                                                                                                                                                                                                                                                                                                                                                                                                                                                                                                                                                                                                                                                                                                                                                                                                                                                                                          |                             |                             |                             |                  |  |  |     |    |    |     |    |    |                             |                             |                             |                             |                             |                             |                                           |  |  |  |  |  |                                 |  |  |  |  |  |                             |                             |                             |                             |                             |                             |                       |  |  |  |  |  |                             |                             |                             |                             |                             |                             |                |  |  |  |  |  |                             |                             |                             |                             |                             |                             |                           |  |  |  |  |  |                             |                             |                             |                             |                             |                             |                 |  |  |  |  |  |                             |                             |                             |                             |                             |                             |                        |  |  |  |  |  |                             |                             |                             |                             |                             |                             |                       |  |  |  |  |  |                             |                             |                             |                             |                             |                             |                              |  |  |  |  |  |                             |                             |                             |                             |                             |                             |                |  |  |  |  |  |                                                                                                                                                                         |  |  |  |  |  |
| 1. <input type="checkbox"/>                                                                                                                                             | 2. <input type="checkbox"/>                                                                                                                                                                                                                                          | 9. <input type="checkbox"/>                                                                                                                                                                                                                                                                                                                                                                                                                                                                                                                                                                                                                                                                                                                                                                                                                                                                                                                                                                                                                                                                                                                                                                                                                                                                                                                                                                                                                                                                                                                                                                                                                                                                                                                                                                                                                                                                                                                                                                                                                                                                                                                                                                                                                                                                                                                                                                                                                                                                                                                                                                                                                                                                                                                                                                                                                                                                                                                                                                                                                                                                                                                                                                                                                                                                                                                                                                                                                                                              | 1. <input type="checkbox"/> | 2. <input type="checkbox"/> | 9. <input type="checkbox"/> |                  |  |  |     |    |    |     |    |    |                             |                             |                             |                             |                             |                             |                                           |  |  |  |  |  |                                 |  |  |  |  |  |                             |                             |                             |                             |                             |                             |                       |  |  |  |  |  |                             |                             |                             |                             |                             |                             |                |  |  |  |  |  |                             |                             |                             |                             |                             |                             |                           |  |  |  |  |  |                             |                             |                             |                             |                             |                             |                 |  |  |  |  |  |                             |                             |                             |                             |                             |                             |                        |  |  |  |  |  |                             |                             |                             |                             |                             |                             |                       |  |  |  |  |  |                             |                             |                             |                             |                             |                             |                              |  |  |  |  |  |                             |                             |                             |                             |                             |                             |                |  |  |  |  |  |                                                                                                                                                                         |  |  |  |  |  |
| d. Arms and/or legs .....                                                                                                                                               |                                                                                                                                                                                                                                                                      |                                                                                                                                                                                                                                                                                                                                                                                                                                                                                                                                                                                                                                                                                                                                                                                                                                                                                                                                                                                                                                                                                                                                                                                                                                                                                                                                                                                                                                                                                                                                                                                                                                                                                                                                                                                                                                                                                                                                                                                                                                                                                                                                                                                                                                                                                                                                                                                                                                                                                                                                                                                                                                                                                                                                                                                                                                                                                                                                                                                                                                                                                                                                                                                                                                                                                                                                                                                                                                                                                          |                             |                             |                             |                  |  |  |     |    |    |     |    |    |                             |                             |                             |                             |                             |                             |                                           |  |  |  |  |  |                                 |  |  |  |  |  |                             |                             |                             |                             |                             |                             |                       |  |  |  |  |  |                             |                             |                             |                             |                             |                             |                |  |  |  |  |  |                             |                             |                             |                             |                             |                             |                           |  |  |  |  |  |                             |                             |                             |                             |                             |                             |                 |  |  |  |  |  |                             |                             |                             |                             |                             |                             |                        |  |  |  |  |  |                             |                             |                             |                             |                             |                             |                       |  |  |  |  |  |                             |                             |                             |                             |                             |                             |                              |  |  |  |  |  |                             |                             |                             |                             |                             |                             |                |  |  |  |  |  |                                                                                                                                                                         |  |  |  |  |  |
| 1. <input type="checkbox"/>                                                                                                                                             | 2. <input type="checkbox"/>                                                                                                                                                                                                                                          | 9. <input type="checkbox"/>                                                                                                                                                                                                                                                                                                                                                                                                                                                                                                                                                                                                                                                                                                                                                                                                                                                                                                                                                                                                                                                                                                                                                                                                                                                                                                                                                                                                                                                                                                                                                                                                                                                                                                                                                                                                                                                                                                                                                                                                                                                                                                                                                                                                                                                                                                                                                                                                                                                                                                                                                                                                                                                                                                                                                                                                                                                                                                                                                                                                                                                                                                                                                                                                                                                                                                                                                                                                                                                              | 1. <input type="checkbox"/> | 2. <input type="checkbox"/> | 9. <input type="checkbox"/> |                  |  |  |     |    |    |     |    |    |                             |                             |                             |                             |                             |                             |                                           |  |  |  |  |  |                                 |  |  |  |  |  |                             |                             |                             |                             |                             |                             |                       |  |  |  |  |  |                             |                             |                             |                             |                             |                             |                |  |  |  |  |  |                             |                             |                             |                             |                             |                             |                           |  |  |  |  |  |                             |                             |                             |                             |                             |                             |                 |  |  |  |  |  |                             |                             |                             |                             |                             |                             |                        |  |  |  |  |  |                             |                             |                             |                             |                             |                             |                       |  |  |  |  |  |                             |                             |                             |                             |                             |                             |                              |  |  |  |  |  |                             |                             |                             |                             |                             |                             |                |  |  |  |  |  |                                                                                                                                                                         |  |  |  |  |  |
| 3. Asthma .....                                                                                                                                                         |                                                                                                                                                                                                                                                                      |                                                                                                                                                                                                                                                                                                                                                                                                                                                                                                                                                                                                                                                                                                                                                                                                                                                                                                                                                                                                                                                                                                                                                                                                                                                                                                                                                                                                                                                                                                                                                                                                                                                                                                                                                                                                                                                                                                                                                                                                                                                                                                                                                                                                                                                                                                                                                                                                                                                                                                                                                                                                                                                                                                                                                                                                                                                                                                                                                                                                                                                                                                                                                                                                                                                                                                                                                                                                                                                                                          |                             |                             |                             |                  |  |  |     |    |    |     |    |    |                             |                             |                             |                             |                             |                             |                                           |  |  |  |  |  |                                 |  |  |  |  |  |                             |                             |                             |                             |                             |                             |                       |  |  |  |  |  |                             |                             |                             |                             |                             |                             |                |  |  |  |  |  |                             |                             |                             |                             |                             |                             |                           |  |  |  |  |  |                             |                             |                             |                             |                             |                             |                 |  |  |  |  |  |                             |                             |                             |                             |                             |                             |                        |  |  |  |  |  |                             |                             |                             |                             |                             |                             |                       |  |  |  |  |  |                             |                             |                             |                             |                             |                             |                              |  |  |  |  |  |                             |                             |                             |                             |                             |                             |                |  |  |  |  |  |                                                                                                                                                                         |  |  |  |  |  |
| 1. <input type="checkbox"/>                                                                                                                                             | 2. <input type="checkbox"/>                                                                                                                                                                                                                                          | 9. <input type="checkbox"/>                                                                                                                                                                                                                                                                                                                                                                                                                                                                                                                                                                                                                                                                                                                                                                                                                                                                                                                                                                                                                                                                                                                                                                                                                                                                                                                                                                                                                                                                                                                                                                                                                                                                                                                                                                                                                                                                                                                                                                                                                                                                                                                                                                                                                                                                                                                                                                                                                                                                                                                                                                                                                                                                                                                                                                                                                                                                                                                                                                                                                                                                                                                                                                                                                                                                                                                                                                                                                                                              | 1. <input type="checkbox"/> | 2. <input type="checkbox"/> | 9. <input type="checkbox"/> |                  |  |  |     |    |    |     |    |    |                             |                             |                             |                             |                             |                             |                                           |  |  |  |  |  |                                 |  |  |  |  |  |                             |                             |                             |                             |                             |                             |                       |  |  |  |  |  |                             |                             |                             |                             |                             |                             |                |  |  |  |  |  |                             |                             |                             |                             |                             |                             |                           |  |  |  |  |  |                             |                             |                             |                             |                             |                             |                 |  |  |  |  |  |                             |                             |                             |                             |                             |                             |                        |  |  |  |  |  |                             |                             |                             |                             |                             |                             |                       |  |  |  |  |  |                             |                             |                             |                             |                             |                             |                              |  |  |  |  |  |                             |                             |                             |                             |                             |                             |                |  |  |  |  |  |                                                                                                                                                                         |  |  |  |  |  |
| 4. Heart disease .....                                                                                                                                                  |                                                                                                                                                                                                                                                                      |                                                                                                                                                                                                                                                                                                                                                                                                                                                                                                                                                                                                                                                                                                                                                                                                                                                                                                                                                                                                                                                                                                                                                                                                                                                                                                                                                                                                                                                                                                                                                                                                                                                                                                                                                                                                                                                                                                                                                                                                                                                                                                                                                                                                                                                                                                                                                                                                                                                                                                                                                                                                                                                                                                                                                                                                                                                                                                                                                                                                                                                                                                                                                                                                                                                                                                                                                                                                                                                                                          |                             |                             |                             |                  |  |  |     |    |    |     |    |    |                             |                             |                             |                             |                             |                             |                                           |  |  |  |  |  |                                 |  |  |  |  |  |                             |                             |                             |                             |                             |                             |                       |  |  |  |  |  |                             |                             |                             |                             |                             |                             |                |  |  |  |  |  |                             |                             |                             |                             |                             |                             |                           |  |  |  |  |  |                             |                             |                             |                             |                             |                             |                 |  |  |  |  |  |                             |                             |                             |                             |                             |                             |                        |  |  |  |  |  |                             |                             |                             |                             |                             |                             |                       |  |  |  |  |  |                             |                             |                             |                             |                             |                             |                              |  |  |  |  |  |                             |                             |                             |                             |                             |                             |                |  |  |  |  |  |                                                                                                                                                                         |  |  |  |  |  |
| 1. <input type="checkbox"/>                                                                                                                                             | 2. <input type="checkbox"/>                                                                                                                                                                                                                                          | 9. <input type="checkbox"/>                                                                                                                                                                                                                                                                                                                                                                                                                                                                                                                                                                                                                                                                                                                                                                                                                                                                                                                                                                                                                                                                                                                                                                                                                                                                                                                                                                                                                                                                                                                                                                                                                                                                                                                                                                                                                                                                                                                                                                                                                                                                                                                                                                                                                                                                                                                                                                                                                                                                                                                                                                                                                                                                                                                                                                                                                                                                                                                                                                                                                                                                                                                                                                                                                                                                                                                                                                                                                                                              | 1. <input type="checkbox"/> | 2. <input type="checkbox"/> | 9. <input type="checkbox"/> |                  |  |  |     |    |    |     |    |    |                             |                             |                             |                             |                             |                             |                                           |  |  |  |  |  |                                 |  |  |  |  |  |                             |                             |                             |                             |                             |                             |                       |  |  |  |  |  |                             |                             |                             |                             |                             |                             |                |  |  |  |  |  |                             |                             |                             |                             |                             |                             |                           |  |  |  |  |  |                             |                             |                             |                             |                             |                             |                 |  |  |  |  |  |                             |                             |                             |                             |                             |                             |                        |  |  |  |  |  |                             |                             |                             |                             |                             |                             |                       |  |  |  |  |  |                             |                             |                             |                             |                             |                             |                              |  |  |  |  |  |                             |                             |                             |                             |                             |                             |                |  |  |  |  |  |                                                                                                                                                                         |  |  |  |  |  |
| 5. Tuberculosis .....                                                                                                                                                   |                                                                                                                                                                                                                                                                      |                                                                                                                                                                                                                                                                                                                                                                                                                                                                                                                                                                                                                                                                                                                                                                                                                                                                                                                                                                                                                                                                                                                                                                                                                                                                                                                                                                                                                                                                                                                                                                                                                                                                                                                                                                                                                                                                                                                                                                                                                                                                                                                                                                                                                                                                                                                                                                                                                                                                                                                                                                                                                                                                                                                                                                                                                                                                                                                                                                                                                                                                                                                                                                                                                                                                                                                                                                                                                                                                                          |                             |                             |                             |                  |  |  |     |    |    |     |    |    |                             |                             |                             |                             |                             |                             |                                           |  |  |  |  |  |                                 |  |  |  |  |  |                             |                             |                             |                             |                             |                             |                       |  |  |  |  |  |                             |                             |                             |                             |                             |                             |                |  |  |  |  |  |                             |                             |                             |                             |                             |                             |                           |  |  |  |  |  |                             |                             |                             |                             |                             |                             |                 |  |  |  |  |  |                             |                             |                             |                             |                             |                             |                        |  |  |  |  |  |                             |                             |                             |                             |                             |                             |                       |  |  |  |  |  |                             |                             |                             |                             |                             |                             |                              |  |  |  |  |  |                             |                             |                             |                             |                             |                             |                |  |  |  |  |  |                                                                                                                                                                         |  |  |  |  |  |
| 1. <input type="checkbox"/>                                                                                                                                             | 2. <input type="checkbox"/>                                                                                                                                                                                                                                          | 9. <input type="checkbox"/>                                                                                                                                                                                                                                                                                                                                                                                                                                                                                                                                                                                                                                                                                                                                                                                                                                                                                                                                                                                                                                                                                                                                                                                                                                                                                                                                                                                                                                                                                                                                                                                                                                                                                                                                                                                                                                                                                                                                                                                                                                                                                                                                                                                                                                                                                                                                                                                                                                                                                                                                                                                                                                                                                                                                                                                                                                                                                                                                                                                                                                                                                                                                                                                                                                                                                                                                                                                                                                                              | 1. <input type="checkbox"/> | 2. <input type="checkbox"/> | 9. <input type="checkbox"/> |                  |  |  |     |    |    |     |    |    |                             |                             |                             |                             |                             |                             |                                           |  |  |  |  |  |                                 |  |  |  |  |  |                             |                             |                             |                             |                             |                             |                       |  |  |  |  |  |                             |                             |                             |                             |                             |                             |                |  |  |  |  |  |                             |                             |                             |                             |                             |                             |                           |  |  |  |  |  |                             |                             |                             |                             |                             |                             |                 |  |  |  |  |  |                             |                             |                             |                             |                             |                             |                        |  |  |  |  |  |                             |                             |                             |                             |                             |                             |                       |  |  |  |  |  |                             |                             |                             |                             |                             |                             |                              |  |  |  |  |  |                             |                             |                             |                             |                             |                             |                |  |  |  |  |  |                                                                                                                                                                         |  |  |  |  |  |
| 6. Epilepsy/convulsion .....                                                                                                                                            |                                                                                                                                                                                                                                                                      |                                                                                                                                                                                                                                                                                                                                                                                                                                                                                                                                                                                                                                                                                                                                                                                                                                                                                                                                                                                                                                                                                                                                                                                                                                                                                                                                                                                                                                                                                                                                                                                                                                                                                                                                                                                                                                                                                                                                                                                                                                                                                                                                                                                                                                                                                                                                                                                                                                                                                                                                                                                                                                                                                                                                                                                                                                                                                                                                                                                                                                                                                                                                                                                                                                                                                                                                                                                                                                                                                          |                             |                             |                             |                  |  |  |     |    |    |     |    |    |                             |                             |                             |                             |                             |                             |                                           |  |  |  |  |  |                                 |  |  |  |  |  |                             |                             |                             |                             |                             |                             |                       |  |  |  |  |  |                             |                             |                             |                             |                             |                             |                |  |  |  |  |  |                             |                             |                             |                             |                             |                             |                           |  |  |  |  |  |                             |                             |                             |                             |                             |                             |                 |  |  |  |  |  |                             |                             |                             |                             |                             |                             |                        |  |  |  |  |  |                             |                             |                             |                             |                             |                             |                       |  |  |  |  |  |                             |                             |                             |                             |                             |                             |                              |  |  |  |  |  |                             |                             |                             |                             |                             |                             |                |  |  |  |  |  |                                                                                                                                                                         |  |  |  |  |  |
| 1. <input type="checkbox"/>                                                                                                                                             | 2. <input type="checkbox"/>                                                                                                                                                                                                                                          | 9. <input type="checkbox"/>                                                                                                                                                                                                                                                                                                                                                                                                                                                                                                                                                                                                                                                                                                                                                                                                                                                                                                                                                                                                                                                                                                                                                                                                                                                                                                                                                                                                                                                                                                                                                                                                                                                                                                                                                                                                                                                                                                                                                                                                                                                                                                                                                                                                                                                                                                                                                                                                                                                                                                                                                                                                                                                                                                                                                                                                                                                                                                                                                                                                                                                                                                                                                                                                                                                                                                                                                                                                                                                              | 1. <input type="checkbox"/> | 2. <input type="checkbox"/> | 9. <input type="checkbox"/> |                  |  |  |     |    |    |     |    |    |                             |                             |                             |                             |                             |                             |                                           |  |  |  |  |  |                                 |  |  |  |  |  |                             |                             |                             |                             |                             |                             |                       |  |  |  |  |  |                             |                             |                             |                             |                             |                             |                |  |  |  |  |  |                             |                             |                             |                             |                             |                             |                           |  |  |  |  |  |                             |                             |                             |                             |                             |                             |                 |  |  |  |  |  |                             |                             |                             |                             |                             |                             |                        |  |  |  |  |  |                             |                             |                             |                             |                             |                             |                       |  |  |  |  |  |                             |                             |                             |                             |                             |                             |                              |  |  |  |  |  |                             |                             |                             |                             |                             |                             |                |  |  |  |  |  |                                                                                                                                                                         |  |  |  |  |  |
| 7. Other .....                                                                                                                                                          |                                                                                                                                                                                                                                                                      |                                                                                                                                                                                                                                                                                                                                                                                                                                                                                                                                                                                                                                                                                                                                                                                                                                                                                                                                                                                                                                                                                                                                                                                                                                                                                                                                                                                                                                                                                                                                                                                                                                                                                                                                                                                                                                                                                                                                                                                                                                                                                                                                                                                                                                                                                                                                                                                                                                                                                                                                                                                                                                                                                                                                                                                                                                                                                                                                                                                                                                                                                                                                                                                                                                                                                                                                                                                                                                                                                          |                             |                             |                             |                  |  |  |     |    |    |     |    |    |                             |                             |                             |                             |                             |                             |                                           |  |  |  |  |  |                                 |  |  |  |  |  |                             |                             |                             |                             |                             |                             |                       |  |  |  |  |  |                             |                             |                             |                             |                             |                             |                |  |  |  |  |  |                             |                             |                             |                             |                             |                             |                           |  |  |  |  |  |                             |                             |                             |                             |                             |                             |                 |  |  |  |  |  |                             |                             |                             |                             |                             |                             |                        |  |  |  |  |  |                             |                             |                             |                             |                             |                             |                       |  |  |  |  |  |                             |                             |                             |                             |                             |                             |                              |  |  |  |  |  |                             |                             |                             |                             |                             |                             |                |  |  |  |  |  |                                                                                                                                                                         |  |  |  |  |  |
| 1. <input type="checkbox"/> 2. <input type="checkbox"/> 9. <input type="checkbox"/> 1. <input type="checkbox"/> 2. <input type="checkbox"/> 9. <input type="checkbox"/> |                                                                                                                                                                                                                                                                      |                                                                                                                                                                                                                                                                                                                                                                                                                                                                                                                                                                                                                                                                                                                                                                                                                                                                                                                                                                                                                                                                                                                                                                                                                                                                                                                                                                                                                                                                                                                                                                                                                                                                                                                                                                                                                                                                                                                                                                                                                                                                                                                                                                                                                                                                                                                                                                                                                                                                                                                                                                                                                                                                                                                                                                                                                                                                                                                                                                                                                                                                                                                                                                                                                                                                                                                                                                                                                                                                                          |                             |                             |                             |                  |  |  |     |    |    |     |    |    |                             |                             |                             |                             |                             |                             |                                           |  |  |  |  |  |                                 |  |  |  |  |  |                             |                             |                             |                             |                             |                             |                       |  |  |  |  |  |                             |                             |                             |                             |                             |                             |                |  |  |  |  |  |                             |                             |                             |                             |                             |                             |                           |  |  |  |  |  |                             |                             |                             |                             |                             |                             |                 |  |  |  |  |  |                             |                             |                             |                             |                             |                             |                        |  |  |  |  |  |                             |                             |                             |                             |                             |                             |                       |  |  |  |  |  |                             |                             |                             |                             |                             |                             |                              |  |  |  |  |  |                             |                             |                             |                             |                             |                             |                |  |  |  |  |  |                                                                                                                                                                         |  |  |  |  |  |
|                                                                                                                                                                         | (specify other).....                                                                                                                                                                                                                                                 | _____                                                                                                                                                                                                                                                                                                                                                                                                                                                                                                                                                                                                                                                                                                                                                                                                                                                                                                                                                                                                                                                                                                                                                                                                                                                                                                                                                                                                                                                                                                                                                                                                                                                                                                                                                                                                                                                                                                                                                                                                                                                                                                                                                                                                                                                                                                                                                                                                                                                                                                                                                                                                                                                                                                                                                                                                                                                                                                                                                                                                                                                                                                                                                                                                                                                                                                                                                                                                                                                                                    |                             |                             |                             |                  |  |  |     |    |    |     |    |    |                             |                             |                             |                             |                             |                             |                                           |  |  |  |  |  |                                 |  |  |  |  |  |                             |                             |                             |                             |                             |                             |                       |  |  |  |  |  |                             |                             |                             |                             |                             |                             |                |  |  |  |  |  |                             |                             |                             |                             |                             |                             |                           |  |  |  |  |  |                             |                             |                             |                             |                             |                             |                 |  |  |  |  |  |                             |                             |                             |                             |                             |                             |                        |  |  |  |  |  |                             |                             |                             |                             |                             |                             |                       |  |  |  |  |  |                             |                             |                             |                             |                             |                             |                              |  |  |  |  |  |                             |                             |                             |                             |                             |                             |                |  |  |  |  |  |                                                                                                                                                                         |  |  |  |  |  |

**VA Section 4: Infant and child deaths (FOR CHILD DEATHS 28 DAYS—59 MONTHS OLD)**

Read: Now I'd like to ask you about <NAME>'s illness.

|      |                                                                    |                                                                                        |
|------|--------------------------------------------------------------------|----------------------------------------------------------------------------------------|
| V4.1 | During the illness that led to death, did the <NAME> have a fever? | 1. Yes<br>2. No<br>9. Don't know<br><br><input type="checkbox"/> <b>2 or 9 → VQ4.6</b> |
|------|--------------------------------------------------------------------|----------------------------------------------------------------------------------------|

Study ID#

|                 |  |  |  |    |  |       |  |  |  |
|-----------------|--|--|--|----|--|-------|--|--|--|
|                 |  |  |  |    |  |       |  |  |  |
| Village/Cluster |  |  |  | HH |  | Child |  |  |  |

**CHILD HEALTH EPIDEMIOLOGY REFERENCE GROUP  
SB/NN/CHILD VERBAL/SOCIAL AUTOPSY QUESTIONNAIRE**

|       |                                                                                                               |                                                                     |                                          |
|-------|---------------------------------------------------------------------------------------------------------------|---------------------------------------------------------------------|------------------------------------------|
| V4.2  | How many days did the fever last?<br>[Less than 24 hours = "00" days]                                         |                                                                     | ___ ___ Days<br>(DK = 99)                |
| V4.3  | Did the fever continue until death?                                                                           | 1. Yes<br>2. No<br>9. Don't know                                    | <input type="checkbox"/> 2 or 9 → VQ4.6  |
| V4.4  | How severe was the fever?                                                                                     | 1. Mild<br>2. Moderate<br>3. Severe<br>9. Don't know                | <input type="checkbox"/>                 |
| V4.5  | What was the pattern of the fever?                                                                            | 1. Continuous<br>2. On and off<br>3. Only at night<br>9. Don't know | <input type="checkbox"/>                 |
| V4.6  | During the illness that led to death, did <NAME> have more frequent loose or liquid stools than usual?        | 1. Yes<br>2. No<br>9. Don't know                                    | <input type="checkbox"/> 2 or 9 → VQ4.12 |
| V4.7  | How many stools did <NAME> have on the day that loose liquid stools were most frequent?                       |                                                                     | ___ ___ Stools<br>(DK = 99)              |
| V4.8  | How many days before death did the frequent loose or liquid stools start?<br>[Less than 24 hours = "00" days] |                                                                     | ___ ___ Days<br>(DK = 99)                |
| V4.9  | Did the frequent loose or liquid stools continue until death?                                                 | 1. Yes<br>2. No<br>9. Don't know                                    | <input type="checkbox"/> 1 or 9 → VQ4.11 |
| V4.10 | How many days before death did the loose or liquid stools stop?<br>[Less than 24 hours = "00" days]           |                                                                     | ___ ___ Days<br>(DK = 99)                |
| V4.11 | Was there visible blood in the loose or liquid stools?                                                        | 1. Yes<br>2. No<br>9. Don't know                                    | <input type="checkbox"/>                 |
| V4.12 | During the illness that led to death, did the child have a cough?                                             | 1. Yes<br>2. No<br>9. Don't know                                    | <input type="checkbox"/> 2 or 9 → VQ4.16 |
| V4.13 | For how many days did the cough last?<br>[Less than 24 hours = "00" days]                                     |                                                                     | ___ ___ Days<br>(DK = 99)                |
| V4.14 | Was the cough very severe?                                                                                    | 1. Yes<br>2. No<br>9. Don't know                                    | <input type="checkbox"/>                 |
| V4.15 | Did the child vomit after s/he coughed?                                                                       | 1. Yes<br>2. No<br>9. Don't know                                    | <input type="checkbox"/>                 |
| V4.16 | During the illness that led to death, did <NAME> have difficult breathing?                                    | 1. Yes<br>2. No<br>9. Don't know                                    | <input type="checkbox"/> 2 or 9 → VQ4.18 |
| V4.17 | For how many days did the difficult breathing last?<br>[Less than 24 hours = "00" days]                       |                                                                     | ___ ___ Days<br>(DK = 99)                |
| V4.18 | During the illness that led to death, did <NAME> have fast breathing?                                         | 1. Yes<br>2. No<br>9. Don't know                                    | <input type="checkbox"/> 2 or 9 → VQ4.20 |

| <b>Inst_1: If both VQ4.16 and VQ4.18 = 2 or 9 → VQ4.25</b> |                                                                                                                                 |                                                                                                             |
|------------------------------------------------------------|---------------------------------------------------------------------------------------------------------------------------------|-------------------------------------------------------------------------------------------------------------|
| V4.19                                                      | For how many days did the fast breathing last?<br><i>[Less than 24 hours = "00" days]</i>                                       | ____ Days<br><i>(DK = 99)</i>                                                                               |
| V4.20                                                      | During the illness that led to death, did s/he have indrawing of the chest?                                                     | 1. Yes<br>2. No<br>9. Don't know<br><input type="checkbox"/>                                                |
| V4.21                                                      | During the illness that led to death, did her/his breathing sound like any of the following?<br><i>[Demonstrate each sound]</i> |                                                                                                             |
| V4.22                                                      | Stridor                                                                                                                         | 1. Yes<br>2. No<br>9. Don't know<br><input type="checkbox"/>                                                |
| V4.23                                                      | Grunting                                                                                                                        | 1. Yes<br>2. No<br>9. Don't know<br><input type="checkbox"/>                                                |
| V4.24                                                      | Wheezing                                                                                                                        | 1. Yes<br>2. No<br>9. Don't know<br><input type="checkbox"/>                                                |
| V4.25                                                      | Did <NAME> experience any generalized convulsions or fits during the illness that led to death?                                 | 1. Yes<br>2. No<br>9. Don't know<br><input type="checkbox"/>                                                |
| V4.26                                                      | Was <NAME> unconscious during the illness that led to death?                                                                    | 1. Yes<br>2. No<br>9. Don't know<br><input type="checkbox"/> <b>2 or 9 → VQ4.28</b>                         |
| V4.27                                                      | How long before death did unconsciousness start?                                                                                | 1. Less than 6 hours<br>2. 6-23 hours<br>3. 24 hours or more<br>9. Don't know<br><input type="checkbox"/>   |
| V4.28                                                      | Did <NAME> have a stiff neck during the illness that led to death?<br><i>[Demonstrate]</i>                                      | 1. Yes<br>2. No<br>9. Don't know<br><input type="checkbox"/>                                                |
| V4.29                                                      | Did <NAME> have a bulging fontanelle during the illness that led to death?<br><i>[Show photo]</i>                               | 1. Yes<br>2. No<br>9. Don't know<br><input type="checkbox"/>                                                |
| V4.30                                                      | During the month before s/he died, did <NAME> have a skin rash?                                                                 | 1. Yes<br>2. No<br>9. Don't know<br><input type="checkbox"/> <b>2 or 9 → VQ4.35</b>                         |
| V4.31                                                      | Where was the rash?                                                                                                             | 1. Face<br>2. Trunk/Abdomen<br>3. Extremities<br>4. Everywhere<br>9. Don't know<br><input type="checkbox"/> |
| V4.32                                                      | Where did the rash start?                                                                                                       | 1. Face<br>2. Trunk/Abdomen<br>3. Extremities<br>4. Everywhere<br>9. Don't know<br><input type="checkbox"/> |

Study ID#

|                 |  |  |  |    |  |       |  |  |  |
|-----------------|--|--|--|----|--|-------|--|--|--|
|                 |  |  |  |    |  |       |  |  |  |
| Village/Cluster |  |  |  | HH |  | Child |  |  |  |

**CHILD HEALTH EPIDEMIOLOGY REFERENCE GROUP  
SB/NN/CHILD VERBAL/SOCIAL AUTOPSY QUESTIONNAIRE**

| V4.33                                       | How many days did the rash last?                                                                                                                           | <div style="text-align: right;">             ____ ____ Days<br/>             (DK = 99)           </div>                                                                                                                                                                                                                                                                                                                                                                                                                                                                                                                                                                                                                                                                                                                                                                                                                                                                                                                                                                                                                                                                                                                                                                                                                                                                                                                                                                                                                                                                                                                                                                                                                                                                                                                                                                                                                                                                                                                                                                                                                                                                                                                                                                                                                                                                                                                                              |                             |     |    |    |                                       |                             |                             |                             |                  |                             |                             |                             |                    |                             |                             |                             |                     |                             |                             |                             |                         |  |  |  |                                             |                             |                             |                             |                  |                             |                             |                             |                                           |                             |                             |                             |  |                             |                             |                             |
|---------------------------------------------|------------------------------------------------------------------------------------------------------------------------------------------------------------|------------------------------------------------------------------------------------------------------------------------------------------------------------------------------------------------------------------------------------------------------------------------------------------------------------------------------------------------------------------------------------------------------------------------------------------------------------------------------------------------------------------------------------------------------------------------------------------------------------------------------------------------------------------------------------------------------------------------------------------------------------------------------------------------------------------------------------------------------------------------------------------------------------------------------------------------------------------------------------------------------------------------------------------------------------------------------------------------------------------------------------------------------------------------------------------------------------------------------------------------------------------------------------------------------------------------------------------------------------------------------------------------------------------------------------------------------------------------------------------------------------------------------------------------------------------------------------------------------------------------------------------------------------------------------------------------------------------------------------------------------------------------------------------------------------------------------------------------------------------------------------------------------------------------------------------------------------------------------------------------------------------------------------------------------------------------------------------------------------------------------------------------------------------------------------------------------------------------------------------------------------------------------------------------------------------------------------------------------------------------------------------------------------------------------------------------------|-----------------------------|-----|----|----|---------------------------------------|-----------------------------|-----------------------------|-----------------------------|------------------|-----------------------------|-----------------------------|-----------------------------|--------------------|-----------------------------|-----------------------------|-----------------------------|---------------------|-----------------------------|-----------------------------|-----------------------------|-------------------------|--|--|--|---------------------------------------------|-----------------------------|-----------------------------|-----------------------------|------------------|-----------------------------|-----------------------------|-----------------------------|-------------------------------------------|-----------------------------|-----------------------------|-----------------------------|--|-----------------------------|-----------------------------|-----------------------------|
| V4.34                                       | Did the rash have blisters containing clear fluid?                                                                                                         | 1. Yes<br>2. No<br>9. Don't know<br><div style="text-align: right; margin-top: 10px;"><input type="checkbox"/></div>                                                                                                                                                                                                                                                                                                                                                                                                                                                                                                                                                                                                                                                                                                                                                                                                                                                                                                                                                                                                                                                                                                                                                                                                                                                                                                                                                                                                                                                                                                                                                                                                                                                                                                                                                                                                                                                                                                                                                                                                                                                                                                                                                                                                                                                                                                                                 |                             |     |    |    |                                       |                             |                             |                             |                  |                             |                             |                             |                    |                             |                             |                             |                     |                             |                             |                             |                         |  |  |  |                                             |                             |                             |                             |                  |                             |                             |                             |                                           |                             |                             |                             |  |                             |                             |                             |
| V4.35                                       | During the illness that led to death, did <NAME>'s limbs (legs, arms) become very thin?<br><br><i>[Show photo]</i>                                         | 1. Yes<br>2. No<br>9. Don't know<br><div style="text-align: right; margin-top: 10px;"><input type="checkbox"/></div>                                                                                                                                                                                                                                                                                                                                                                                                                                                                                                                                                                                                                                                                                                                                                                                                                                                                                                                                                                                                                                                                                                                                                                                                                                                                                                                                                                                                                                                                                                                                                                                                                                                                                                                                                                                                                                                                                                                                                                                                                                                                                                                                                                                                                                                                                                                                 |                             |     |    |    |                                       |                             |                             |                             |                  |                             |                             |                             |                    |                             |                             |                             |                     |                             |                             |                             |                         |  |  |  |                                             |                             |                             |                             |                  |                             |                             |                             |                                           |                             |                             |                             |  |                             |                             |                             |
| V4.36                                       | During the illness that led to death, did <NAME> have swollen legs or feet?                                                                                | 1. Yes<br>2. No<br>9. Don't know<br><div style="text-align: right; margin-top: 10px;"><input type="checkbox"/> <b>2 or 9 → VQ4.38</b></div>                                                                                                                                                                                                                                                                                                                                                                                                                                                                                                                                                                                                                                                                                                                                                                                                                                                                                                                                                                                                                                                                                                                                                                                                                                                                                                                                                                                                                                                                                                                                                                                                                                                                                                                                                                                                                                                                                                                                                                                                                                                                                                                                                                                                                                                                                                          |                             |     |    |    |                                       |                             |                             |                             |                  |                             |                             |                             |                    |                             |                             |                             |                     |                             |                             |                             |                         |  |  |  |                                             |                             |                             |                             |                  |                             |                             |                             |                                           |                             |                             |                             |  |                             |                             |                             |
| V4.37                                       | How long did the swelling last?<br><br><i>[Record days or weeks.]</i>                                                                                      | <div style="text-align: right;">             ____ ____ Days<br/>             (DK = 99)           </div> <hr/> <div style="text-align: right;">             ____ ____ Weeks<br/>             (DK = 99)           </div>                                                                                                                                                                                                                                                                                                                                                                                                                                                                                                                                                                                                                                                                                                                                                                                                                                                                                                                                                                                                                                                                                                                                                                                                                                                                                                                                                                                                                                                                                                                                                                                                                                                                                                                                                                                                                                                                                                                                                                                                                                                                                                                                                                                                                               |                             |     |    |    |                                       |                             |                             |                             |                  |                             |                             |                             |                    |                             |                             |                             |                     |                             |                             |                             |                         |  |  |  |                                             |                             |                             |                             |                  |                             |                             |                             |                                           |                             |                             |                             |  |                             |                             |                             |
| V4.38                                       | During the illness that led to death, did <NAME>'s skin flake off in patches?                                                                              | 1. Yes<br>2. No<br>9. Don't know<br><div style="text-align: right; margin-top: 10px;"><input type="checkbox"/></div>                                                                                                                                                                                                                                                                                                                                                                                                                                                                                                                                                                                                                                                                                                                                                                                                                                                                                                                                                                                                                                                                                                                                                                                                                                                                                                                                                                                                                                                                                                                                                                                                                                                                                                                                                                                                                                                                                                                                                                                                                                                                                                                                                                                                                                                                                                                                 |                             |     |    |    |                                       |                             |                             |                             |                  |                             |                             |                             |                    |                             |                             |                             |                     |                             |                             |                             |                         |  |  |  |                                             |                             |                             |                             |                  |                             |                             |                             |                                           |                             |                             |                             |  |                             |                             |                             |
| V4.39                                       | Did <NAME>'s hair change in color to a reddish or yellowish color?                                                                                         | 1. Yes<br>2. No<br>9. Don't know<br><div style="text-align: right; margin-top: 10px;"><input type="checkbox"/></div>                                                                                                                                                                                                                                                                                                                                                                                                                                                                                                                                                                                                                                                                                                                                                                                                                                                                                                                                                                                                                                                                                                                                                                                                                                                                                                                                                                                                                                                                                                                                                                                                                                                                                                                                                                                                                                                                                                                                                                                                                                                                                                                                                                                                                                                                                                                                 |                             |     |    |    |                                       |                             |                             |                             |                  |                             |                             |                             |                    |                             |                             |                             |                     |                             |                             |                             |                         |  |  |  |                                             |                             |                             |                             |                  |                             |                             |                             |                                           |                             |                             |                             |  |                             |                             |                             |
| V4.40                                       | Did <NAME> have a protruding belly?                                                                                                                        | 1. Yes<br>2. No<br>9. Don't know<br><div style="text-align: right; margin-top: 10px;"><input type="checkbox"/></div>                                                                                                                                                                                                                                                                                                                                                                                                                                                                                                                                                                                                                                                                                                                                                                                                                                                                                                                                                                                                                                                                                                                                                                                                                                                                                                                                                                                                                                                                                                                                                                                                                                                                                                                                                                                                                                                                                                                                                                                                                                                                                                                                                                                                                                                                                                                                 |                             |     |    |    |                                       |                             |                             |                             |                  |                             |                             |                             |                    |                             |                             |                             |                     |                             |                             |                             |                         |  |  |  |                                             |                             |                             |                             |                  |                             |                             |                             |                                           |                             |                             |                             |  |                             |                             |                             |
| V4.41                                       | During the illness that led to death, did <NAME> suffer from "lack of blood" or "pallor"?                                                                  | 1. Yes<br>2. No<br>9. Don't know<br><div style="text-align: right; margin-top: 10px;"><input type="checkbox"/></div>                                                                                                                                                                                                                                                                                                                                                                                                                                                                                                                                                                                                                                                                                                                                                                                                                                                                                                                                                                                                                                                                                                                                                                                                                                                                                                                                                                                                                                                                                                                                                                                                                                                                                                                                                                                                                                                                                                                                                                                                                                                                                                                                                                                                                                                                                                                                 |                             |     |    |    |                                       |                             |                             |                             |                  |                             |                             |                             |                    |                             |                             |                             |                     |                             |                             |                             |                         |  |  |  |                                             |                             |                             |                             |                  |                             |                             |                             |                                           |                             |                             |                             |  |                             |                             |                             |
| V4.42                                       | During the illness that led to death, did <NAME> have swelling in the armpits?                                                                             | 1. Yes<br>2. No<br>9. Don't know<br><div style="text-align: right; margin-top: 10px;"><input type="checkbox"/></div>                                                                                                                                                                                                                                                                                                                                                                                                                                                                                                                                                                                                                                                                                                                                                                                                                                                                                                                                                                                                                                                                                                                                                                                                                                                                                                                                                                                                                                                                                                                                                                                                                                                                                                                                                                                                                                                                                                                                                                                                                                                                                                                                                                                                                                                                                                                                 |                             |     |    |    |                                       |                             |                             |                             |                  |                             |                             |                             |                    |                             |                             |                             |                     |                             |                             |                             |                         |  |  |  |                                             |                             |                             |                             |                  |                             |                             |                             |                                           |                             |                             |                             |  |                             |                             |                             |
| V4.43                                       | During the illness that led to death, did <NAME> have a whitish rash inside the mouth or on the tongue?                                                    | 1. Yes<br>2. No<br>9. Don't know<br><div style="text-align: right; margin-top: 10px;"><input type="checkbox"/></div>                                                                                                                                                                                                                                                                                                                                                                                                                                                                                                                                                                                                                                                                                                                                                                                                                                                                                                                                                                                                                                                                                                                                                                                                                                                                                                                                                                                                                                                                                                                                                                                                                                                                                                                                                                                                                                                                                                                                                                                                                                                                                                                                                                                                                                                                                                                                 |                             |     |    |    |                                       |                             |                             |                             |                  |                             |                             |                             |                    |                             |                             |                             |                     |                             |                             |                             |                         |  |  |  |                                             |                             |                             |                             |                  |                             |                             |                             |                                           |                             |                             |                             |  |                             |                             |                             |
| V4.44                                       | During the illness that led to death, did <NAME> bleed from anywhere?                                                                                      | 1. Yes<br>2. No<br>9. Don't know<br><div style="text-align: right; margin-top: 10px;"><input type="checkbox"/> <b>2 or 9 → VQ4.46</b></div>                                                                                                                                                                                                                                                                                                                                                                                                                                                                                                                                                                                                                                                                                                                                                                                                                                                                                                                                                                                                                                                                                                                                                                                                                                                                                                                                                                                                                                                                                                                                                                                                                                                                                                                                                                                                                                                                                                                                                                                                                                                                                                                                                                                                                                                                                                          |                             |     |    |    |                                       |                             |                             |                             |                  |                             |                             |                             |                    |                             |                             |                             |                     |                             |                             |                             |                         |  |  |  |                                             |                             |                             |                             |                  |                             |                             |                             |                                           |                             |                             |                             |  |                             |                             |                             |
| V4.45                                       | <i>Record from where s/he bled:</i>                                                                                                                        |                                                                                                                                                                                                                                                                                                                                                                                                                                                                                                                                                                                                                                                                                                                                                                                                                                                                                                                                                                                                                                                                                                                                                                                                                                                                                                                                                                                                                                                                                                                                                                                                                                                                                                                                                                                                                                                                                                                                                                                                                                                                                                                                                                                                                                                                                                                                                                                                                                                      |                             |     |    |    |                                       |                             |                             |                             |                  |                             |                             |                             |                    |                             |                             |                             |                     |                             |                             |                             |                         |  |  |  |                                             |                             |                             |                             |                  |                             |                             |                             |                                           |                             |                             |                             |  |                             |                             |                             |
| V4.46                                       | During the illness that led to death, did s/he have areas of the skin that turned black?                                                                   | 1. Yes<br>2. No<br>8. Don't know<br><div style="text-align: right; margin-top: 10px;"><input type="checkbox"/></div>                                                                                                                                                                                                                                                                                                                                                                                                                                                                                                                                                                                                                                                                                                                                                                                                                                                                                                                                                                                                                                                                                                                                                                                                                                                                                                                                                                                                                                                                                                                                                                                                                                                                                                                                                                                                                                                                                                                                                                                                                                                                                                                                                                                                                                                                                                                                 |                             |     |    |    |                                       |                             |                             |                             |                  |                             |                             |                             |                    |                             |                             |                             |                     |                             |                             |                             |                         |  |  |  |                                             |                             |                             |                             |                  |                             |                             |                             |                                           |                             |                             |                             |  |                             |                             |                             |
| V4.47                                       | Did <NAME> suffer from an injury or accident such as...?<br><br><i>[Ask the respondent each in sequence and mark each as "Yes," "No" or "Don't know."]</i> | <table style="width: 100%; border-collapse: collapse;"> <thead> <tr> <th style="width: 60%;"></th> <th style="width: 10%; text-align: center;">Yes</th> <th style="width: 10%; text-align: center;">No</th> <th style="width: 10%; text-align: center;">DK</th> </tr> </thead> <tbody> <tr> <td>1. a road traffic crash/injury? .....</td> <td style="text-align: center;">1. <input type="checkbox"/></td> <td style="text-align: center;">2. <input type="checkbox"/></td> <td style="text-align: center;">9. <input type="checkbox"/></td> </tr> <tr> <td>2. a fall? .....</td> <td style="text-align: center;">1. <input type="checkbox"/></td> <td style="text-align: center;">2. <input type="checkbox"/></td> <td style="text-align: center;">9. <input type="checkbox"/></td> </tr> <tr> <td>3. drowning? .....</td> <td style="text-align: center;">1. <input type="checkbox"/></td> <td style="text-align: center;">2. <input type="checkbox"/></td> <td style="text-align: center;">9. <input type="checkbox"/></td> </tr> <tr> <td>4. poisoning? .....</td> <td style="text-align: center;">1. <input type="checkbox"/></td> <td style="text-align: center;">2. <input type="checkbox"/></td> <td style="text-align: center;">9. <input type="checkbox"/></td> </tr> <tr> <td colspan="4"><u>Did s/he suffer:</u></td> </tr> <tr> <td>5. a bite or sting by a venomous animal? ..</td> <td style="text-align: center;">1. <input type="checkbox"/></td> <td style="text-align: center;">2. <input type="checkbox"/></td> <td style="text-align: center;">9. <input type="checkbox"/></td> </tr> <tr> <td>6. a burn? .....</td> <td style="text-align: center;">1. <input type="checkbox"/></td> <td style="text-align: center;">2. <input type="checkbox"/></td> <td style="text-align: center;">9. <input type="checkbox"/></td> </tr> <tr> <td>7. from violence (homicide, abuse)? .....</td> <td style="text-align: center;">1. <input type="checkbox"/></td> <td style="text-align: center;">2. <input type="checkbox"/></td> <td style="text-align: center;">9. <input type="checkbox"/></td> </tr> <tr> <td></td> <td style="text-align: center;">1. <input type="checkbox"/></td> <td style="text-align: center;">2. <input type="checkbox"/></td> <td style="text-align: center;">9. <input type="checkbox"/></td> </tr> </tbody> </table> <div style="text-align: right; margin-top: 10px;"> <b>All = 2 or 9 → SQ6.1</b> </div> |                             | Yes | No | DK | 1. a road traffic crash/injury? ..... | 1. <input type="checkbox"/> | 2. <input type="checkbox"/> | 9. <input type="checkbox"/> | 2. a fall? ..... | 1. <input type="checkbox"/> | 2. <input type="checkbox"/> | 9. <input type="checkbox"/> | 3. drowning? ..... | 1. <input type="checkbox"/> | 2. <input type="checkbox"/> | 9. <input type="checkbox"/> | 4. poisoning? ..... | 1. <input type="checkbox"/> | 2. <input type="checkbox"/> | 9. <input type="checkbox"/> | <u>Did s/he suffer:</u> |  |  |  | 5. a bite or sting by a venomous animal? .. | 1. <input type="checkbox"/> | 2. <input type="checkbox"/> | 9. <input type="checkbox"/> | 6. a burn? ..... | 1. <input type="checkbox"/> | 2. <input type="checkbox"/> | 9. <input type="checkbox"/> | 7. from violence (homicide, abuse)? ..... | 1. <input type="checkbox"/> | 2. <input type="checkbox"/> | 9. <input type="checkbox"/> |  | 1. <input type="checkbox"/> | 2. <input type="checkbox"/> | 9. <input type="checkbox"/> |
|                                             | Yes                                                                                                                                                        | No                                                                                                                                                                                                                                                                                                                                                                                                                                                                                                                                                                                                                                                                                                                                                                                                                                                                                                                                                                                                                                                                                                                                                                                                                                                                                                                                                                                                                                                                                                                                                                                                                                                                                                                                                                                                                                                                                                                                                                                                                                                                                                                                                                                                                                                                                                                                                                                                                                                   | DK                          |     |    |    |                                       |                             |                             |                             |                  |                             |                             |                             |                    |                             |                             |                             |                     |                             |                             |                             |                         |  |  |  |                                             |                             |                             |                             |                  |                             |                             |                             |                                           |                             |                             |                             |  |                             |                             |                             |
| 1. a road traffic crash/injury? .....       | 1. <input type="checkbox"/>                                                                                                                                | 2. <input type="checkbox"/>                                                                                                                                                                                                                                                                                                                                                                                                                                                                                                                                                                                                                                                                                                                                                                                                                                                                                                                                                                                                                                                                                                                                                                                                                                                                                                                                                                                                                                                                                                                                                                                                                                                                                                                                                                                                                                                                                                                                                                                                                                                                                                                                                                                                                                                                                                                                                                                                                          | 9. <input type="checkbox"/> |     |    |    |                                       |                             |                             |                             |                  |                             |                             |                             |                    |                             |                             |                             |                     |                             |                             |                             |                         |  |  |  |                                             |                             |                             |                             |                  |                             |                             |                             |                                           |                             |                             |                             |  |                             |                             |                             |
| 2. a fall? .....                            | 1. <input type="checkbox"/>                                                                                                                                | 2. <input type="checkbox"/>                                                                                                                                                                                                                                                                                                                                                                                                                                                                                                                                                                                                                                                                                                                                                                                                                                                                                                                                                                                                                                                                                                                                                                                                                                                                                                                                                                                                                                                                                                                                                                                                                                                                                                                                                                                                                                                                                                                                                                                                                                                                                                                                                                                                                                                                                                                                                                                                                          | 9. <input type="checkbox"/> |     |    |    |                                       |                             |                             |                             |                  |                             |                             |                             |                    |                             |                             |                             |                     |                             |                             |                             |                         |  |  |  |                                             |                             |                             |                             |                  |                             |                             |                             |                                           |                             |                             |                             |  |                             |                             |                             |
| 3. drowning? .....                          | 1. <input type="checkbox"/>                                                                                                                                | 2. <input type="checkbox"/>                                                                                                                                                                                                                                                                                                                                                                                                                                                                                                                                                                                                                                                                                                                                                                                                                                                                                                                                                                                                                                                                                                                                                                                                                                                                                                                                                                                                                                                                                                                                                                                                                                                                                                                                                                                                                                                                                                                                                                                                                                                                                                                                                                                                                                                                                                                                                                                                                          | 9. <input type="checkbox"/> |     |    |    |                                       |                             |                             |                             |                  |                             |                             |                             |                    |                             |                             |                             |                     |                             |                             |                             |                         |  |  |  |                                             |                             |                             |                             |                  |                             |                             |                             |                                           |                             |                             |                             |  |                             |                             |                             |
| 4. poisoning? .....                         | 1. <input type="checkbox"/>                                                                                                                                | 2. <input type="checkbox"/>                                                                                                                                                                                                                                                                                                                                                                                                                                                                                                                                                                                                                                                                                                                                                                                                                                                                                                                                                                                                                                                                                                                                                                                                                                                                                                                                                                                                                                                                                                                                                                                                                                                                                                                                                                                                                                                                                                                                                                                                                                                                                                                                                                                                                                                                                                                                                                                                                          | 9. <input type="checkbox"/> |     |    |    |                                       |                             |                             |                             |                  |                             |                             |                             |                    |                             |                             |                             |                     |                             |                             |                             |                         |  |  |  |                                             |                             |                             |                             |                  |                             |                             |                             |                                           |                             |                             |                             |  |                             |                             |                             |
| <u>Did s/he suffer:</u>                     |                                                                                                                                                            |                                                                                                                                                                                                                                                                                                                                                                                                                                                                                                                                                                                                                                                                                                                                                                                                                                                                                                                                                                                                                                                                                                                                                                                                                                                                                                                                                                                                                                                                                                                                                                                                                                                                                                                                                                                                                                                                                                                                                                                                                                                                                                                                                                                                                                                                                                                                                                                                                                                      |                             |     |    |    |                                       |                             |                             |                             |                  |                             |                             |                             |                    |                             |                             |                             |                     |                             |                             |                             |                         |  |  |  |                                             |                             |                             |                             |                  |                             |                             |                             |                                           |                             |                             |                             |  |                             |                             |                             |
| 5. a bite or sting by a venomous animal? .. | 1. <input type="checkbox"/>                                                                                                                                | 2. <input type="checkbox"/>                                                                                                                                                                                                                                                                                                                                                                                                                                                                                                                                                                                                                                                                                                                                                                                                                                                                                                                                                                                                                                                                                                                                                                                                                                                                                                                                                                                                                                                                                                                                                                                                                                                                                                                                                                                                                                                                                                                                                                                                                                                                                                                                                                                                                                                                                                                                                                                                                          | 9. <input type="checkbox"/> |     |    |    |                                       |                             |                             |                             |                  |                             |                             |                             |                    |                             |                             |                             |                     |                             |                             |                             |                         |  |  |  |                                             |                             |                             |                             |                  |                             |                             |                             |                                           |                             |                             |                             |  |                             |                             |                             |
| 6. a burn? .....                            | 1. <input type="checkbox"/>                                                                                                                                | 2. <input type="checkbox"/>                                                                                                                                                                                                                                                                                                                                                                                                                                                                                                                                                                                                                                                                                                                                                                                                                                                                                                                                                                                                                                                                                                                                                                                                                                                                                                                                                                                                                                                                                                                                                                                                                                                                                                                                                                                                                                                                                                                                                                                                                                                                                                                                                                                                                                                                                                                                                                                                                          | 9. <input type="checkbox"/> |     |    |    |                                       |                             |                             |                             |                  |                             |                             |                             |                    |                             |                             |                             |                     |                             |                             |                             |                         |  |  |  |                                             |                             |                             |                             |                  |                             |                             |                             |                                           |                             |                             |                             |  |                             |                             |                             |
| 7. from violence (homicide, abuse)? .....   | 1. <input type="checkbox"/>                                                                                                                                | 2. <input type="checkbox"/>                                                                                                                                                                                                                                                                                                                                                                                                                                                                                                                                                                                                                                                                                                                                                                                                                                                                                                                                                                                                                                                                                                                                                                                                                                                                                                                                                                                                                                                                                                                                                                                                                                                                                                                                                                                                                                                                                                                                                                                                                                                                                                                                                                                                                                                                                                                                                                                                                          | 9. <input type="checkbox"/> |     |    |    |                                       |                             |                             |                             |                  |                             |                             |                             |                    |                             |                             |                             |                     |                             |                             |                             |                         |  |  |  |                                             |                             |                             |                             |                  |                             |                             |                             |                                           |                             |                             |                             |  |                             |                             |                             |
|                                             | 1. <input type="checkbox"/>                                                                                                                                | 2. <input type="checkbox"/>                                                                                                                                                                                                                                                                                                                                                                                                                                                                                                                                                                                                                                                                                                                                                                                                                                                                                                                                                                                                                                                                                                                                                                                                                                                                                                                                                                                                                                                                                                                                                                                                                                                                                                                                                                                                                                                                                                                                                                                                                                                                                                                                                                                                                                                                                                                                                                                                                          | 9. <input type="checkbox"/> |     |    |    |                                       |                             |                             |                             |                  |                             |                             |                             |                    |                             |                             |                             |                     |                             |                             |                             |                         |  |  |  |                                             |                             |                             |                             |                  |                             |                             |                             |                                           |                             |                             |                             |  |                             |                             |                             |

Study ID# 

|  |  |  |  |
|--|--|--|--|
|  |  |  |  |
|--|--|--|--|

|  |  |  |  |
|--|--|--|--|
|  |  |  |  |
|--|--|--|--|

|  |  |
|--|--|
|  |  |
|--|--|

  
Village/Cluster
HH
Child

|                                                                                                            |
|------------------------------------------------------------------------------------------------------------|
| <b>CHILD HEALTH EPIDEMIOLOGY REFERENCE GROUP</b><br><b>SB/NN/CHILD VERBAL/SOCIAL AUTOPSY QUESTIONNAIRE</b> |
|------------------------------------------------------------------------------------------------------------|

|           |                                                                                                                                                                               |                                  |                                                                                                                                                                                                                                                                                                                                                                                                                                                                                                                                                                                 |  |  |       |           |  |  |  |  |      |           |  |  |
|-----------|-------------------------------------------------------------------------------------------------------------------------------------------------------------------------------|----------------------------------|---------------------------------------------------------------------------------------------------------------------------------------------------------------------------------------------------------------------------------------------------------------------------------------------------------------------------------------------------------------------------------------------------------------------------------------------------------------------------------------------------------------------------------------------------------------------------------|--|--|-------|-----------|--|--|--|--|------|-----------|--|--|
|           |                                                                                                                                                                               | 8. any other injury? .....       |                                                                                                                                                                                                                                                                                                                                                                                                                                                                                                                                                                                 |  |  |       |           |  |  |  |  |      |           |  |  |
|           |                                                                                                                                                                               | (If "Yes," then specify).....    |                                                                                                                                                                                                                                                                                                                                                                                                                                                                                                                                                                                 |  |  |       |           |  |  |  |  |      |           |  |  |
| V4.48     | Was the injury or accident intentionally inflicted by someone else?                                                                                                           | 1. Yes<br>2. No<br>8. Don't know | <input type="checkbox"/>                                                                                                                                                                                                                                                                                                                                                                                                                                                                                                                                                        |  |  |       |           |  |  |  |  |      |           |  |  |
| V4.49     | How long did <NAME> survive after the injury or accident?<br><br><i>[Record hours if less than 24 hours—Less than 1 hour = "00" hours;<br/>Record days if 1 day or more.]</i> |                                  | <table style="width: 100%; border-collapse: collapse;"> <tr> <td style="border-bottom: 1px solid black; width: 10%;"></td> <td style="border-bottom: 1px solid black; width: 10%;"></td> <td style="border-bottom: 1px solid black;">Hours</td> </tr> <tr> <td colspan="3" style="padding-left: 20px;">(DK = 99)</td> </tr> <tr> <td style="border-bottom: 1px solid black;"></td> <td style="border-bottom: 1px solid black;"></td> <td style="border-bottom: 1px solid black;">Days</td> </tr> <tr> <td colspan="3" style="padding-left: 20px;">(DK = 99)</td> </tr> </table> |  |  | Hours | (DK = 99) |  |  |  |  | Days | (DK = 99) |  |  |
|           |                                                                                                                                                                               | Hours                            |                                                                                                                                                                                                                                                                                                                                                                                                                                                                                                                                                                                 |  |  |       |           |  |  |  |  |      |           |  |  |
| (DK = 99) |                                                                                                                                                                               |                                  |                                                                                                                                                                                                                                                                                                                                                                                                                                                                                                                                                                                 |  |  |       |           |  |  |  |  |      |           |  |  |
|           |                                                                                                                                                                               | Days                             |                                                                                                                                                                                                                                                                                                                                                                                                                                                                                                                                                                                 |  |  |       |           |  |  |  |  |      |           |  |  |
| (DK = 99) |                                                                                                                                                                               |                                  |                                                                                                                                                                                                                                                                                                                                                                                                                                                                                                                                                                                 |  |  |       |           |  |  |  |  |      |           |  |  |



**SA Module 6: Care-seeking for the child's fatal illness (FOR NN & CHILD DEATHS 0—59 MONTHS OLD)**

**Read:** Now, I'd like to ask you about <NAME>'s fatal illness and the care and treatments that s/he received.

|      |                                        |                                                                                                                                                                                             |                          |
|------|----------------------------------------|---------------------------------------------------------------------------------------------------------------------------------------------------------------------------------------------|--------------------------|
| S6.1 | Who first noticed that <NAME> was ill? | 1. The respondent<br>2. Other relative, neighbor, friend<br>3. CHW or nurse at home or in community<br>4. Doctor or nurse at a health facility<br>5. Other ( <i>specify</i> ).....<br>_____ | <input type="checkbox"/> |
|------|----------------------------------------|---------------------------------------------------------------------------------------------------------------------------------------------------------------------------------------------|--------------------------|

|      |                                                                                                                                                                                                                                                                                                                                                                                                                                                                                             |                                        |                                        |
|------|---------------------------------------------------------------------------------------------------------------------------------------------------------------------------------------------------------------------------------------------------------------------------------------------------------------------------------------------------------------------------------------------------------------------------------------------------------------------------------------------|----------------------------------------|----------------------------------------|
| S6.2 | Earlier you said that <NAME> had <SYMPTOM(S)> during her/his illness.<br><i>[Read back all the child's symptoms from VA section 3 (for neonates) or VA section 4 (for children).]</i><br><br>How did <SQ6.1 PERSON> first know that <NAME> was ill? Which of these symptoms did s/he have at that time?<br><br>What symptoms did s/he have next? On what day of the illness did these symptoms start?<br><br><i>[Probe until all the symptoms are recorded in the order they appeared.]</i> | <b>Symptoms in order of appearance</b> | <b>Illness day the symptom started</b> |
|      |                                                                                                                                                                                                                                                                                                                                                                                                                                                                                             | 1.                                     |                                        |
|      |                                                                                                                                                                                                                                                                                                                                                                                                                                                                                             | 2.                                     |                                        |
|      |                                                                                                                                                                                                                                                                                                                                                                                                                                                                                             | 3.                                     |                                        |
|      |                                                                                                                                                                                                                                                                                                                                                                                                                                                                                             | 4.                                     |                                        |
|      |                                                                                                                                                                                                                                                                                                                                                                                                                                                                                             | 5.                                     |                                        |
|      |                                                                                                                                                                                                                                                                                                                                                                                                                                                                                             | 6.                                     |                                        |

|                                                                 |                                                                                                                         |                                                                                                                                                                                                                                                                                                                                                                                                                                                                                                                                                                                                                                                                                                                                                                                                                                                                                                                                                                                                                                                                                                                                                                                                                                                                                                                              |                             |                             |               |                 |           |                                                |                             |                             |                             |                             |                                       |                             |                             |                             |                             |                                                                 |                             |                             |                             |                             |  |
|-----------------------------------------------------------------|-------------------------------------------------------------------------------------------------------------------------|------------------------------------------------------------------------------------------------------------------------------------------------------------------------------------------------------------------------------------------------------------------------------------------------------------------------------------------------------------------------------------------------------------------------------------------------------------------------------------------------------------------------------------------------------------------------------------------------------------------------------------------------------------------------------------------------------------------------------------------------------------------------------------------------------------------------------------------------------------------------------------------------------------------------------------------------------------------------------------------------------------------------------------------------------------------------------------------------------------------------------------------------------------------------------------------------------------------------------------------------------------------------------------------------------------------------------|-----------------------------|-----------------------------|---------------|-----------------|-----------|------------------------------------------------|-----------------------------|-----------------------------|-----------------------------|-----------------------------|---------------------------------------|-----------------------------|-----------------------------|-----------------------------|-----------------------------|-----------------------------------------------------------------|-----------------------------|-----------------------------|-----------------------------|-----------------------------|--|
| S6.3                                                            | When <SQ6.1 PERSON> first noticed that <NAME> was ill, was s/he...<br><br><i>[Read the choices for each condition.]</i> | <table style="width: 100%; border-collapse: collapse;"> <tr> <td></td> <td style="text-align: center;"><u>Normal</u></td> <td style="text-align: center;"><u>Medium</u></td> <td style="text-align: center;"><u>Abnormal</u></td> <td style="text-align: center;"><u>DK</u></td> </tr> <tr> <td>1. Feeding normally, poorly, or not at all....</td> <td style="text-align: center;">1. <input type="checkbox"/></td> <td style="text-align: center;">2. <input type="checkbox"/></td> <td style="text-align: center;">3. <input type="checkbox"/></td> <td style="text-align: center;">9. <input type="checkbox"/></td> </tr> <tr> <td>2. Alert, drowsy, or unconscious.....</td> <td style="text-align: center;">1. <input type="checkbox"/></td> <td style="text-align: center;">2. <input type="checkbox"/></td> <td style="text-align: center;">3. <input type="checkbox"/></td> <td style="text-align: center;">9. <input type="checkbox"/></td> </tr> <tr> <td>3. Normally active, less active than normal, or not moving.....</td> <td style="text-align: center;">1. <input type="checkbox"/></td> <td style="text-align: center;">2. <input type="checkbox"/></td> <td style="text-align: center;">3. <input type="checkbox"/></td> <td style="text-align: center;">9. <input type="checkbox"/></td> </tr> </table> |                             | <u>Normal</u>               | <u>Medium</u> | <u>Abnormal</u> | <u>DK</u> | 1. Feeding normally, poorly, or not at all.... | 1. <input type="checkbox"/> | 2. <input type="checkbox"/> | 3. <input type="checkbox"/> | 9. <input type="checkbox"/> | 2. Alert, drowsy, or unconscious..... | 1. <input type="checkbox"/> | 2. <input type="checkbox"/> | 3. <input type="checkbox"/> | 9. <input type="checkbox"/> | 3. Normally active, less active than normal, or not moving..... | 1. <input type="checkbox"/> | 2. <input type="checkbox"/> | 3. <input type="checkbox"/> | 9. <input type="checkbox"/> |  |
|                                                                 | <u>Normal</u>                                                                                                           | <u>Medium</u>                                                                                                                                                                                                                                                                                                                                                                                                                                                                                                                                                                                                                                                                                                                                                                                                                                                                                                                                                                                                                                                                                                                                                                                                                                                                                                                | <u>Abnormal</u>             | <u>DK</u>                   |               |                 |           |                                                |                             |                             |                             |                             |                                       |                             |                             |                             |                             |                                                                 |                             |                             |                             |                             |  |
| 1. Feeding normally, poorly, or not at all....                  | 1. <input type="checkbox"/>                                                                                             | 2. <input type="checkbox"/>                                                                                                                                                                                                                                                                                                                                                                                                                                                                                                                                                                                                                                                                                                                                                                                                                                                                                                                                                                                                                                                                                                                                                                                                                                                                                                  | 3. <input type="checkbox"/> | 9. <input type="checkbox"/> |               |                 |           |                                                |                             |                             |                             |                             |                                       |                             |                             |                             |                             |                                                                 |                             |                             |                             |                             |  |
| 2. Alert, drowsy, or unconscious.....                           | 1. <input type="checkbox"/>                                                                                             | 2. <input type="checkbox"/>                                                                                                                                                                                                                                                                                                                                                                                                                                                                                                                                                                                                                                                                                                                                                                                                                                                                                                                                                                                                                                                                                                                                                                                                                                                                                                  | 3. <input type="checkbox"/> | 9. <input type="checkbox"/> |               |                 |           |                                                |                             |                             |                             |                             |                                       |                             |                             |                             |                             |                                                                 |                             |                             |                             |                             |  |
| 3. Normally active, less active than normal, or not moving..... | 1. <input type="checkbox"/>                                                                                             | 2. <input type="checkbox"/>                                                                                                                                                                                                                                                                                                                                                                                                                                                                                                                                                                                                                                                                                                                                                                                                                                                                                                                                                                                                                                                                                                                                                                                                                                                                                                  | 3. <input type="checkbox"/> | 9. <input type="checkbox"/> |               |                 |           |                                                |                             |                             |                             |                             |                                       |                             |                             |                             |                             |                                                                 |                             |                             |                             |                             |  |

|      |                                                                                                                 |                                                                                             |                                                                     |
|------|-----------------------------------------------------------------------------------------------------------------|---------------------------------------------------------------------------------------------|---------------------------------------------------------------------|
| S6.4 | Did <NAME> receive, or did you <u>seek</u> or <u>try to seek</u> , any care or treatment for the fatal illness? | 1. Yes<br>2. No—care not needed, given or sought<br>3. No—died immediately<br>9. Don't know | <input type="checkbox"/> 2 → <b>SQ6.6</b><br><b>3 or 9 → VQ5.10</b> |
|------|-----------------------------------------------------------------------------------------------------------------|---------------------------------------------------------------------------------------------|---------------------------------------------------------------------|

S6.5 Please tell me everything you did for <NAME>'s fatal illness inside the home and all the places outside the home you took or tried to take (her / him) for health care. Start with the first care or treatment <NAME> received and then, in order, tell me all the other care and treatments s/he received. Also tell me when and for what symptoms you took each action.  
  
*[Include any provider <NAME> did not reach because s/he died before leaving home or on route.]*  
  
*(1) Check one other care or health provider box for each action row. (2) For neonatal deaths only: If the illness began at the health provider where the child was delivered, then mark that as Action 1 and check the "illness began at provider" box. (3) Record the illness day each action was taken. (4) Ensure no action was taken for a symptom before it started (in SQ6.2).*

| Action # | (1) Other care                              |                                    |                           | (1) Health Providers                 |                                 |                          |                          | (2) Illness began at provider where child was delivered | (3) Illness day the action was taken | (4) For what symptom(s) was the action taken? |
|----------|---------------------------------------------|------------------------------------|---------------------------|--------------------------------------|---------------------------------|--------------------------|--------------------------|---------------------------------------------------------|--------------------------------------|-----------------------------------------------|
|          | Home care (own, relative, neighbor, friend) | Traditional or non-formal provider | Pharmacist or drug seller | Trained CH Worker, nurse, or midwife | Private doctor (formal/ unsure) | NGO or govt. clinic      | Hospital                 |                                                         |                                      |                                               |
| 1.       | <input type="checkbox"/>                    | <input type="checkbox"/>           | <input type="checkbox"/>  | <input type="checkbox"/>             | <input type="checkbox"/>        | <input type="checkbox"/> | <input type="checkbox"/> | <input type="checkbox"/>                                | ____/____<br>(DK = 99)               |                                               |
| 2.       | <input type="checkbox"/>                    | <input type="checkbox"/>           | <input type="checkbox"/>  | <input type="checkbox"/>             | <input type="checkbox"/>        | <input type="checkbox"/> | <input type="checkbox"/> | <input type="checkbox"/>                                | ____/____<br>(DK = 99)               |                                               |
| 3.       | <input type="checkbox"/>                    | <input type="checkbox"/>           | <input type="checkbox"/>  | <input type="checkbox"/>             | <input type="checkbox"/>        | <input type="checkbox"/> | <input type="checkbox"/> | <input type="checkbox"/>                                | ____/____<br>(DK = 99)               |                                               |

|    |                          |                          |                          |                          |                          |                          |                          |  |           |
|----|--------------------------|--------------------------|--------------------------|--------------------------|--------------------------|--------------------------|--------------------------|--|-----------|
| 4. | <input type="checkbox"/> | <input type="checkbox"/> | <input type="checkbox"/> | <input type="checkbox"/> | <input type="checkbox"/> | <input type="checkbox"/> | <input type="checkbox"/> |  | (DK = 99) |
| 5. | <input type="checkbox"/> | <input type="checkbox"/> | <input type="checkbox"/> | <input type="checkbox"/> | <input type="checkbox"/> | <input type="checkbox"/> | <input type="checkbox"/> |  | (DK = 99) |
| 6. | <input type="checkbox"/> | <input type="checkbox"/> | <input type="checkbox"/> | <input type="checkbox"/> | <input type="checkbox"/> | <input type="checkbox"/> | <input type="checkbox"/> |  | (DK = 99) |
| 7. | <input type="checkbox"/> | <input type="checkbox"/> | <input type="checkbox"/> | <input type="checkbox"/> | <input type="checkbox"/> | <input type="checkbox"/> | <input type="checkbox"/> |  | (DK = 99) |

**Inst\_1: (For neonatal deaths only) If illness began at health provider where child was delivered:  
 And did not fill L&D matrix (module 4) → SQ6.10; And filled L&D matrix (module 4) → SQ6.16**

|        |                                                                                                                                                                                                                                                                                                                                            |                                                                                                                                                                                                                                                                                                                                                                                                                                                                                                                                                                                                                                                                                                                                             |                                                                                                                                                                                                                                                                                                                                                                                                                                                                                                                |
|--------|--------------------------------------------------------------------------------------------------------------------------------------------------------------------------------------------------------------------------------------------------------------------------------------------------------------------------------------------|---------------------------------------------------------------------------------------------------------------------------------------------------------------------------------------------------------------------------------------------------------------------------------------------------------------------------------------------------------------------------------------------------------------------------------------------------------------------------------------------------------------------------------------------------------------------------------------------------------------------------------------------------------------------------------------------------------------------------------------------|----------------------------------------------------------------------------------------------------------------------------------------------------------------------------------------------------------------------------------------------------------------------------------------------------------------------------------------------------------------------------------------------------------------------------------------------------------------------------------------------------------------|
| S6.6   | <p><i>If no care given or sought, ask: Who decided that &lt;NAME&gt; did not need any care or treatment for the illness?</i></p> <p><i>If any care given or sought, ask: Who decided that &lt;ACTION 1&gt; was the first thing to do for &lt;NAME&gt;'s illness?</i></p> <p><i>[Record the one main decision maker.]</i></p>               | <p>1. Child's mother.....</p> <p>2. Child's father.....</p> <p>3. Child's aunt.....</p> <p>4. Child's uncle .....</p> <p>5. Child's grandmother .....</p> <p>6. Child's paternal grandfather.....</p> <p>7. Child's maternal grandfather.....</p> <p>8. Other (<i>specify</i>).....</p> <p>9. Don't know .....</p>                                                                                                                                                                                                                                                                                                                                                                                                                          | <p>1. <input type="checkbox"/></p> <p>2. <input type="checkbox"/></p> <p>3. <input type="checkbox"/></p> <p>4. <input type="checkbox"/></p> <p>5. <input type="checkbox"/></p> <p>6. <input type="checkbox"/></p> <p>7. <input type="checkbox"/></p> <p>8. <input type="checkbox"/></p> <p>9. <input type="checkbox"/></p>                                                                                                                                                                                     |
| S6.7   | <p><i>If never taken to a health provider, ask: Did you have any concerns or problems that kept you from taking &lt;NAME&gt; to a health provider during his/her illness?</i></p> <p><i>If taken to a health provider, ask: Did you have to overcome any concerns or problems to take &lt;NAME&gt; to the (first) health provider?</i></p> | <p>1. Yes</p> <p>2. No</p> <p>9. Don't know</p>                                                                                                                                                                                                                                                                                                                                                                                                                                                                                                                                                                                                                                                                                             | <p><input type="checkbox"/> <b>2 or 9 → Inst_2</b></p>                                                                                                                                                                                                                                                                                                                                                                                                                                                         |
| S6.7.1 | <p>What concerns or problems did you have?</p> <p><i>Prompt: Was there anything else?</i></p> <p><i>[Multiple answers allowed.]</i></p>                                                                                                                                                                                                    | <p>1. Did not think child was sick enough to need health care.....</p> <p>2. No one available to go with caregiver.....</p> <p>3. Too much time from her regular duties...</p> <p>4. Someone else (<i>specify</i>) had to decide....</p> <p>5. Too far to travel .....</p> <p>6. No transportation available.....</p> <p>7. Cost (transport, health care, other).....</p> <p>8. Not satisfied with available health care...</p> <p>9. Problem required traditional care.....</p> <p>10. Thought child was too sick to travel.....</p> <p>11. Thought child will die no matter what....</p> <p>12. Was late at night (transportation or provider not available) .....</p> <p>13. Other (<i>specify</i>).....</p> <p>99. Don't know .....</p> | <p>1. <input type="checkbox"/></p> <p>2. <input type="checkbox"/></p> <p>3. <input type="checkbox"/></p> <p>4. <input type="checkbox"/></p> <p>5. <input type="checkbox"/></p> <p>6. <input type="checkbox"/></p> <p>7. <input type="checkbox"/></p> <p>8. <input type="checkbox"/></p> <p>9. <input type="checkbox"/></p> <p>10. <input type="checkbox"/></p> <p>11. <input type="checkbox"/></p> <p>12. <input type="checkbox"/></p> <p>13. <input type="checkbox"/></p> <p>99. <input type="checkbox"/></p> |

**Inst\_2: If SQ6.4 = 2 (No care given) or  
 If SQ6.5 ≠ "Health Provider" (Never took and never tried to take to a health provider) → SQ6.39**

|      |                                                                                                                                                                                                                                                                                                                                                                                                                                                                                                                                                                         |                                                                                                              |
|------|-------------------------------------------------------------------------------------------------------------------------------------------------------------------------------------------------------------------------------------------------------------------------------------------------------------------------------------------------------------------------------------------------------------------------------------------------------------------------------------------------------------------------------------------------------------------------|--------------------------------------------------------------------------------------------------------------|
| S6.8 | <p><i>Refer to SQ6.5 for the first health provider and related symptoms:</i></p> <p>You mentioned that you took &lt;NAME&gt; to the (first) health provider, I mean the &lt;FIRST HEALTH PROVIDER&gt; for &lt;SYMPTOM(S)&gt;. How long had &lt;NAME&gt; had (this / these) symptom(s) when it was decided to take him/her to the &lt;FIRST HEALTH PROVIDER&gt;?</p> <p><i>[Read "...to the first..." if took or tried to take to more than one health provider.]</i></p> <p><i>[Mark days, hours &amp;/or minutes as needed: e.g. 00 day, 02 hours, 10 minutes]</i></p> | <p>____ Days<br/>(DK = 99)</p> <hr/> <p>____ Hours<br/>(DK = 99)</p> <hr/> <p>____ Minutes<br/>(DK = 99)</p> |
|------|-------------------------------------------------------------------------------------------------------------------------------------------------------------------------------------------------------------------------------------------------------------------------------------------------------------------------------------------------------------------------------------------------------------------------------------------------------------------------------------------------------------------------------------------------------------------------|--------------------------------------------------------------------------------------------------------------|

**Child illness matrix instructions:** Ask the following questions for the first and last health providers where care was sought or tried to be sought for the fatal illness. Ask all the questions for the first provider before going on to the last.

Before asking about the first health provider, read:  
 Now I would like to ask you about your visit to the (first) health provider. [Read "first" if went or tried to go to more than one provider.]

Before asking about the last health provider, read:  
 Now I would like to ask you about your visit to the last health provider, I mean the <LAST HEALTH PROVIDER>.

| - CHILD ILLNESS MATRIX QUESTIONS -                                                                                                                                                                                                                                                                                                                                                                                                                                                                                            |                                                                                                                                                                                                                                                                                                                                                  | FIRST HEALTH PROVIDER                                                                                                                                                                                                                                                                                                                                                              | LAST HEALTH PROVIDER                                                                                                                                                                                                                                                                                                                                                                |
|-------------------------------------------------------------------------------------------------------------------------------------------------------------------------------------------------------------------------------------------------------------------------------------------------------------------------------------------------------------------------------------------------------------------------------------------------------------------------------------------------------------------------------|--------------------------------------------------------------------------------------------------------------------------------------------------------------------------------------------------------------------------------------------------------------------------------------------------------------------------------------------------|------------------------------------------------------------------------------------------------------------------------------------------------------------------------------------------------------------------------------------------------------------------------------------------------------------------------------------------------------------------------------------|-------------------------------------------------------------------------------------------------------------------------------------------------------------------------------------------------------------------------------------------------------------------------------------------------------------------------------------------------------------------------------------|
| At the time when it was decided to take <NAME> to the <FIRST/LAST HEALTH PROVIDER>, was s/he...<br><br>[Read the choices for each condition.]                                                                                                                                                                                                                                                                                                                                                                                 | 1. Feeding normally, poorly, or not at all.....<br>2. Alert, drowsy, or unconscious .....<br>3. Normally active, less active than normal, or not moving.....                                                                                                                                                                                     | S6.9<br>Nrml Med Abnrm DK<br>1. <input type="checkbox"/> 2. <input type="checkbox"/> 3. <input type="checkbox"/> 9. <input type="checkbox"/><br>1. <input type="checkbox"/> 2. <input type="checkbox"/> 3. <input type="checkbox"/> 9. <input type="checkbox"/><br>1. <input type="checkbox"/> 2. <input type="checkbox"/> 3. <input type="checkbox"/> 9. <input type="checkbox"/> | S6.24<br>Nrml Med Abnrm DK<br>1. <input type="checkbox"/> 2. <input type="checkbox"/> 3. <input type="checkbox"/> 9. <input type="checkbox"/><br>1. <input type="checkbox"/> 2. <input type="checkbox"/> 3. <input type="checkbox"/> 9. <input type="checkbox"/><br>1. <input type="checkbox"/> 2. <input type="checkbox"/> 3. <input type="checkbox"/> 9. <input type="checkbox"/> |
| What was the name of the <FIRST/LAST HEALTH PROVIDER> where you took <NAME>?<br><br>Probe to identify the type of provider.                                                                                                                                                                                                                                                                                                                                                                                                   | 1. Hospital (Government)<br>2. Hospital (NGO)<br>3. Hospital (Private)<br>4. Health center (Government)<br>5. Health center (NGO)<br>6. Health post (Government)<br>7. Health post (NGO)<br>8. Private doctor/clinic (Formal)<br>9. Private doctor/clinic (?Formal?)<br>10. Trained community health worker, nurse, or midwife<br>99. Don't know | S6.10<br><br><input type="checkbox"/> <input type="checkbox"/><br><br>_____<br>(Name of Provider or Facility)                                                                                                                                                                                                                                                                      | S6.25<br><br><input type="checkbox"/> <input type="checkbox"/><br><br>_____<br>(Name of Provider or Facility)                                                                                                                                                                                                                                                                       |
| After (deciding to seek care / being referred), how much time passed before going to the <FIRST/LAST HEALTH PROVIDER>?<br><br>[Discuss that this might include the time needed to arrange for transportation and money to go to the provider/facility, or to provide home care or go to a traditional provider before going to the health provider.]<br><br>[If the child died at home, record the time from decision/referral to death.]<br><br>[Mark days, hours &/or minutes as needed: e.g. 01 day, 05 hours, 30 minutes] |                                                                                                                                                                                                                                                                                                                                                  | S6.11<br><br>____ Days<br>(DK = 99)<br><br>____ Hours<br>(DK = 99)<br><br>____ Minutes<br>(DK = 99)                                                                                                                                                                                                                                                                                | S6.26<br><br>____ Days<br>(DK = 99)<br><br>____ Hours<br>(DK = 99)<br><br>____ Minutes<br>(DK = 99)                                                                                                                                                                                                                                                                                 |
| Was there any cost to travel to the <FIRST/LAST HEALTH PROVIDER> or pay for the child's care there?                                                                                                                                                                                                                                                                                                                                                                                                                           | 1. Yes<br>2. No<br>9. Don't know                                                                                                                                                                                                                                                                                                                 | S6.12<br><br><input type="checkbox"/> 2 or 9 → SQ6.13                                                                                                                                                                                                                                                                                                                              | S6.27<br><br><input type="checkbox"/> 2 or 9 → SQ6.28                                                                                                                                                                                                                                                                                                                               |
| How did you arrange for the money for these expenses?<br><br>[Multiple answers allowed.]                                                                                                                                                                                                                                                                                                                                                                                                                                      | 1. Had available .....<br>2. Borrowed.....<br>3. Sold assets.....<br>4. Help from kin/relatives.....<br>5. Community fund.....<br>6. Govt. scheme .....<br>7. Other .....<br>9. Don't know .....                                                                                                                                                 | S6.12.1<br>1. <input type="checkbox"/><br>2. <input type="checkbox"/><br>3. <input type="checkbox"/><br>4. <input type="checkbox"/><br>5. <input type="checkbox"/><br>6. <input type="checkbox"/><br>7. <input type="checkbox"/><br>9. <input type="checkbox"/>                                                                                                                    | S6.27.1<br>1. <input type="checkbox"/><br>2. <input type="checkbox"/><br>3. <input type="checkbox"/><br>4. <input type="checkbox"/><br>5. <input type="checkbox"/><br>6. <input type="checkbox"/><br>7. <input type="checkbox"/><br>9. <input type="checkbox"/>                                                                                                                     |
| What transportation method was used to go there?<br><br>[Multiple answers allowed.]                                                                                                                                                                                                                                                                                                                                                                                                                                           | 1. Walk .....<br>2. Bicycle/animal/cart/ boat .....<br>3. Bus.....<br>4. Taxi/auto/trecker/motorcycle .....<br>5. Ambulance .....<br>6. Other .....<br>7. Could not arrange transport .....<br>9. Don't know .....                                                                                                                               | S6.13<br>1. <input type="checkbox"/> <b>If only walk</b><br>2. <input type="checkbox"/> → SQ6.14.1<br>3. <input type="checkbox"/><br>4. <input type="checkbox"/><br>5. <input type="checkbox"/><br>6. <input type="checkbox"/><br>7. <input type="checkbox"/> → SQ6.14.1<br>9. <input type="checkbox"/>                                                                            | S6.28<br>1. <input type="checkbox"/> <b>If only walk</b><br>2. <input type="checkbox"/> → SQ6.29.1<br>3. <input type="checkbox"/><br>4. <input type="checkbox"/><br>5. <input type="checkbox"/><br>6. <input type="checkbox"/><br>7. <input type="checkbox"/> → SQ6.29.1<br>9. <input type="checkbox"/>                                                                             |
| How much did the transportation cost?                                                                                                                                                                                                                                                                                                                                                                                                                                                                                         |                                                                                                                                                                                                                                                                                                                                                  | S6.14<br><br>_____ unit<br>(DK=9999)                                                                                                                                                                                                                                                                                                                                               | S6.29<br><br>_____ unit<br>(DK = 9999)                                                                                                                                                                                                                                                                                                                                              |

|                                                                                                                                                                                                 |                                                                                                                                                                                                                                                                                                                                                                                                                                                                                                                                                                                                                                                                                                                                                                                                                                                                                                                                                                                                                                                                                                                                                                                                         |                                                                                                                                                                                                                                                                                                                                                                                                                                                                                                                                                                                                                                                                                                                                       |                                                                                                                                                                                                                                                                                                                                                                                                                                                                                                                                                                                                                                                                                                                                       |
|-------------------------------------------------------------------------------------------------------------------------------------------------------------------------------------------------|---------------------------------------------------------------------------------------------------------------------------------------------------------------------------------------------------------------------------------------------------------------------------------------------------------------------------------------------------------------------------------------------------------------------------------------------------------------------------------------------------------------------------------------------------------------------------------------------------------------------------------------------------------------------------------------------------------------------------------------------------------------------------------------------------------------------------------------------------------------------------------------------------------------------------------------------------------------------------------------------------------------------------------------------------------------------------------------------------------------------------------------------------------------------------------------------------------|---------------------------------------------------------------------------------------------------------------------------------------------------------------------------------------------------------------------------------------------------------------------------------------------------------------------------------------------------------------------------------------------------------------------------------------------------------------------------------------------------------------------------------------------------------------------------------------------------------------------------------------------------------------------------------------------------------------------------------------|---------------------------------------------------------------------------------------------------------------------------------------------------------------------------------------------------------------------------------------------------------------------------------------------------------------------------------------------------------------------------------------------------------------------------------------------------------------------------------------------------------------------------------------------------------------------------------------------------------------------------------------------------------------------------------------------------------------------------------------|
| <p>Did the child reach the &lt;FIRST/LAST HEALTH PROVIDER&gt; before s/he died?<br/>         [If "No," discuss with respondent to determine correct response: 2, 3 or 4.]</p>                   | <p>1. Yes, reached before child died<br/>         2. No, died before setting out<br/>         3. No, died on route to this provider<br/>         4. No, could not reach this provider – did not set out/returned home/took other action<br/>         9. Don't know</p>                                                                                                                                                                                                                                                                                                                                                                                                                                                                                                                                                                                                                                                                                                                                                                                                                                                                                                                                  | <p>S6.14.1<br/> <input type="checkbox"/> 2, 3 → SQ6.39<br/> <input type="checkbox"/> 4, 9 → Inst_4</p>                                                                                                                                                                                                                                                                                                                                                                                                                                                                                                                                                                                                                                | <p>S6.29.1<br/> <input type="checkbox"/> 2-9 → SQ6.39</p>                                                                                                                                                                                                                                                                                                                                                                                                                                                                                                                                                                                                                                                                             |
| <p>How long did it take to travel to the &lt;FIRST/LAST HEALTH PROVIDER&gt;?<br/>         [Mark hours &amp;/or minutes as needed: e.g. 02 hours, 10 minutes]</p>                                | <p>S6.15<br/>         _____ Hours<br/>         (DK = 99)<br/>         _____ Minutes<br/>         (DK = 99)</p>                                                                                                                                                                                                                                                                                                                                                                                                                                                                                                                                                                                                                                                                                                                                                                                                                                                                                                                                                                                                                                                                                          | <p>S6.30<br/>         _____ Hours<br/>         (DK = 99)<br/>         _____ Minutes<br/>         (DK = 99)</p>                                                                                                                                                                                                                                                                                                                                                                                                                                                                                                                                                                                                                        |                                                                                                                                                                                                                                                                                                                                                                                                                                                                                                                                                                                                                                                                                                                                       |
| <p>What did the &lt;FIRST/LAST HEALTH PROVIDER&gt; do for &lt;NAME&gt;'s problem?<br/>         Prompt: Was there anything else?<br/>         [Multiple answers allowed.]</p>                    | <p>1. Gave oxygen ..... 1. <input type="checkbox"/><br/>         2. Helped breathe with bag or mask.. 2. <input type="checkbox"/><br/>         3. Gave fluids by mouth ..... 3. <input type="checkbox"/><br/>         4. Gave antibiotics by mouth ..... 4. <input type="checkbox"/><br/>         5. Gave antimalarial by mouth..... 5. <input type="checkbox"/><br/>         6. Gave ORS ..... 6. <input type="checkbox"/><br/>         7. Gave Vitamin A ..... 7. <input type="checkbox"/><br/>         8. Gave other medicine by mouth .... 8. <input type="checkbox"/><br/>         9. Gave IM medicine ..... 9. <input type="checkbox"/><br/>         10. Gave IV fluids or medicine ..... 10. <input type="checkbox"/><br/>         11. Advised to buy outside medicine... 11. <input type="checkbox"/><br/>         12. Did an operation (specify) ..... 12. <input type="checkbox"/><br/>         13. Admitted to hospital..... 13. <input type="checkbox"/> stayed ___ days<br/>         14. Other (specify)..... 14. <input type="checkbox"/><br/>         15. Nothing..... 15. <input type="checkbox"/> → SQ6.18<br/>         99. Don't know ..... 99. <input type="checkbox"/> → SQ6.18</p> | <p>S6.16<br/>         1. <input type="checkbox"/><br/>         2. <input type="checkbox"/><br/>         3. <input type="checkbox"/><br/>         4. <input type="checkbox"/><br/>         5. <input type="checkbox"/><br/>         6. <input type="checkbox"/><br/>         7. <input type="checkbox"/><br/>         8. <input type="checkbox"/><br/>         9. <input type="checkbox"/><br/>         10. <input type="checkbox"/><br/>         11. <input type="checkbox"/><br/>         12. <input type="checkbox"/><br/>         13. <input type="checkbox"/> stayed ___ days<br/>         14. <input type="checkbox"/><br/>         15. <input type="checkbox"/> → SQ6.18<br/>         99. <input type="checkbox"/> → SQ6.18</p> | <p>S6.31<br/>         1. <input type="checkbox"/><br/>         2. <input type="checkbox"/><br/>         3. <input type="checkbox"/><br/>         4. <input type="checkbox"/><br/>         5. <input type="checkbox"/><br/>         6. <input type="checkbox"/><br/>         7. <input type="checkbox"/><br/>         8. <input type="checkbox"/><br/>         9. <input type="checkbox"/><br/>         10. <input type="checkbox"/><br/>         11. <input type="checkbox"/><br/>         12. <input type="checkbox"/><br/>         13. <input type="checkbox"/> stayed ___ days<br/>         14. <input type="checkbox"/><br/>         15. <input type="checkbox"/> → SQ6.33<br/>         99. <input type="checkbox"/> → SQ6.33</p> |
| <p>How much did you pay for these treatments and other costs related to the health care, including the admission fee, consultation, lab tests, equipment, and room and food for companions?</p> | <p>S6.17<br/>         _____ unit<br/>         (DK = 99999)</p>                                                                                                                                                                                                                                                                                                                                                                                                                                                                                                                                                                                                                                                                                                                                                                                                                                                                                                                                                                                                                                                                                                                                          | <p>S6.32<br/>         _____ unit<br/>         (DK = 99999)</p>                                                                                                                                                                                                                                                                                                                                                                                                                                                                                                                                                                                                                                                                        |                                                                                                                                                                                                                                                                                                                                                                                                                                                                                                                                                                                                                                                                                                                                       |
| <p>Did the &lt;FIRST/LAST HEALTH PROVIDER&gt; refer &lt;NAME&gt; to another health provider or facility?</p>                                                                                    | <p>1. Yes<br/>         2. No<br/>         9. Don't know</p>                                                                                                                                                                                                                                                                                                                                                                                                                                                                                                                                                                                                                                                                                                                                                                                                                                                                                                                                                                                                                                                                                                                                             | <p>S6.18<br/> <input type="checkbox"/> 2 or 9 → SQ6.19</p>                                                                                                                                                                                                                                                                                                                                                                                                                                                                                                                                                                                                                                                                            | <p>S6.33<br/> <input type="checkbox"/> 2 or 9 → SQ6.34</p>                                                                                                                                                                                                                                                                                                                                                                                                                                                                                                                                                                                                                                                                            |
| <p>Why was &lt;NAME&gt; referred?<br/>         [Multiple answers allowed.]</p>                                                                                                                  | <p>1. The provider was not capable of managing the problem..... 1. <input type="checkbox"/><br/>         2. Required supplies (e.g., drugs, IV, oxygen) not available..... 2. <input type="checkbox"/><br/>         3. Required equipment (e.g., xray machine) not available..... 3. <input type="checkbox"/><br/>         9. Don't know ..... 9. <input type="checkbox"/></p>                                                                                                                                                                                                                                                                                                                                                                                                                                                                                                                                                                                                                                                                                                                                                                                                                          | <p>S6.18.1<br/>         1. <input type="checkbox"/><br/>         2. <input type="checkbox"/><br/>         3. <input type="checkbox"/><br/>         9. <input type="checkbox"/></p>                                                                                                                                                                                                                                                                                                                                                                                                                                                                                                                                                    | <p>S6.33.1<br/>         1. <input type="checkbox"/><br/>         2. <input type="checkbox"/><br/>         3. <input type="checkbox"/><br/>         9. <input type="checkbox"/></p>                                                                                                                                                                                                                                                                                                                                                                                                                                                                                                                                                    |
| <p>Did &lt;NAME&gt; leave the &lt;FIRST/LAST HEALTH PROVIDER&gt; alive?</p>                                                                                                                     | <p>1. Yes, left alive<br/>         2. No, died at this provider</p>                                                                                                                                                                                                                                                                                                                                                                                                                                                                                                                                                                                                                                                                                                                                                                                                                                                                                                                                                                                                                                                                                                                                     | <p>S6.19<br/> <input type="checkbox"/> 2 → VQ5.4</p>                                                                                                                                                                                                                                                                                                                                                                                                                                                                                                                                                                                                                                                                                  | <p>S6.34<br/> <input type="checkbox"/> 2 → VQ5.4</p>                                                                                                                                                                                                                                                                                                                                                                                                                                                                                                                                                                                                                                                                                  |
| <p>Did the &lt;FIRST/LAST HEALTH PROVIDER&gt; suggest that you do anything for &lt;NAME&gt;'s illness after leaving?</p>                                                                        | <p>1. Yes<br/>         2. No<br/>         9. Don't know</p>                                                                                                                                                                                                                                                                                                                                                                                                                                                                                                                                                                                                                                                                                                                                                                                                                                                                                                                                                                                                                                                                                                                                             | <p>S6.20<br/> <input type="checkbox"/> 2 or 9 → SQ6.22</p>                                                                                                                                                                                                                                                                                                                                                                                                                                                                                                                                                                                                                                                                            | <p>S6.35<br/> <input type="checkbox"/> 2 or 9 → SQ6.37</p>                                                                                                                                                                                                                                                                                                                                                                                                                                                                                                                                                                                                                                                                            |

| What did the <FIRST/LAST HEALTH PROVIDER> suggest that you do?<br><br><i>Prompt: Was there anything else?</i><br><br><i>[Multiple answers allowed.]</i>                                                                                                                                                                          | 1. Increase breastfeeding.....<br>2. Give extra fluids .....<br>3. Continue feeding .....<br>4. Give ORS .....<br>5. Give antibiotic by mouth .....<br>6. Give antimalarial by mouth.....<br>7. Give vitamin A by mouth .....<br>8. Return for follow-up visit.....<br>9. Return or referred if worse .....<br>10. Complete the present referral.....<br>11. Other ( <i>specify</i> ).....<br>99. Don't know .....                                                                | S6.20.1<br>1. <input type="checkbox"/><br>2. <input type="checkbox"/><br>3. <input type="checkbox"/><br>4. <input type="checkbox"/><br>5. <input type="checkbox"/><br>6. <input type="checkbox"/><br>7. <input type="checkbox"/><br>8. <input type="checkbox"/><br>9. <input type="checkbox"/><br>10. <input type="checkbox"/><br>11. <input type="checkbox"/><br>99. <input type="checkbox"/> → <b>SQ6.22</b>                                                                                                                                                                                                                                                                                                                                                                    | S6.35.1<br>1. <input type="checkbox"/><br>2. <input type="checkbox"/><br>3. <input type="checkbox"/><br>4. <input type="checkbox"/><br>5. <input type="checkbox"/><br>6. <input type="checkbox"/><br>7. <input type="checkbox"/><br>8. <input type="checkbox"/><br>9. <input type="checkbox"/><br>10. <input type="checkbox"/><br>11. <input type="checkbox"/><br>99. <input type="checkbox"/> → <b>SQ6.37</b> |     |       |    |                             |                             |                             |                             |                             |                             |                             |                             |                             |                             |                             |                             |                                                                                                                                                                                                                                                                                                                                                                                                                                                                                                                                                                                                                                                                                                                                                                                   |      |     |       |    |                             |                             |                             |                             |                             |                             |                             |                             |                             |                             |                             |                             |
|----------------------------------------------------------------------------------------------------------------------------------------------------------------------------------------------------------------------------------------------------------------------------------------------------------------------------------|-----------------------------------------------------------------------------------------------------------------------------------------------------------------------------------------------------------------------------------------------------------------------------------------------------------------------------------------------------------------------------------------------------------------------------------------------------------------------------------|-----------------------------------------------------------------------------------------------------------------------------------------------------------------------------------------------------------------------------------------------------------------------------------------------------------------------------------------------------------------------------------------------------------------------------------------------------------------------------------------------------------------------------------------------------------------------------------------------------------------------------------------------------------------------------------------------------------------------------------------------------------------------------------|----------------------------------------------------------------------------------------------------------------------------------------------------------------------------------------------------------------------------------------------------------------------------------------------------------------------------------------------------------------------------------------------------------------|-----|-------|----|-----------------------------|-----------------------------|-----------------------------|-----------------------------|-----------------------------|-----------------------------|-----------------------------|-----------------------------|-----------------------------|-----------------------------|-----------------------------|-----------------------------|-----------------------------------------------------------------------------------------------------------------------------------------------------------------------------------------------------------------------------------------------------------------------------------------------------------------------------------------------------------------------------------------------------------------------------------------------------------------------------------------------------------------------------------------------------------------------------------------------------------------------------------------------------------------------------------------------------------------------------------------------------------------------------------|------|-----|-------|----|-----------------------------|-----------------------------|-----------------------------|-----------------------------|-----------------------------|-----------------------------|-----------------------------|-----------------------------|-----------------------------|-----------------------------|-----------------------------|-----------------------------|
| Were you able to follow <u>all</u> the advice?                                                                                                                                                                                                                                                                                   | 1. Yes<br>2. No<br>9. Don't know                                                                                                                                                                                                                                                                                                                                                                                                                                                  | S6.21<br><input type="checkbox"/> <b>9</b> → <b>SQ6.22</b>                                                                                                                                                                                                                                                                                                                                                                                                                                                                                                                                                                                                                                                                                                                        | S6.36<br><input type="checkbox"/> <b>9</b> → <b>SQ6.37</b>                                                                                                                                                                                                                                                                                                                                                     |     |       |    |                             |                             |                             |                             |                             |                             |                             |                             |                             |                             |                             |                             |                                                                                                                                                                                                                                                                                                                                                                                                                                                                                                                                                                                                                                                                                                                                                                                   |      |     |       |    |                             |                             |                             |                             |                             |                             |                             |                             |                             |                             |                             |                             |
| <i>If <u>not</u> able to follow <u>all</u> the advice, ask:</i><br>Did you have any concerns or problems that kept you from following the advice?<br><br><i>If <u>able</u> to follow <u>all</u> the advice, ask:</i><br>Did you have to overcome any concerns or problems to follow the advice?                                  | 1. Yes<br>2. No<br>9. Don't know                                                                                                                                                                                                                                                                                                                                                                                                                                                  | S6.21.1<br><input type="checkbox"/> <b>2 or 9</b> → <b>SQ6.22</b>                                                                                                                                                                                                                                                                                                                                                                                                                                                                                                                                                                                                                                                                                                                 | S6.36.1<br><input type="checkbox"/> <b>2 or 9</b> → <b>SQ6.37</b>                                                                                                                                                                                                                                                                                                                                              |     |       |    |                             |                             |                             |                             |                             |                             |                             |                             |                             |                             |                             |                             |                                                                                                                                                                                                                                                                                                                                                                                                                                                                                                                                                                                                                                                                                                                                                                                   |      |     |       |    |                             |                             |                             |                             |                             |                             |                             |                             |                             |                             |                             |                             |
| What concerns or problems did you have?<br><br><i>Prompt: Was there anything else?</i><br><br><i>[Multiple answers allowed.]</i>                                                                                                                                                                                                 | 1. Did not understand instructions.....<br>2. Too much time from regular duties.<br>3. Someone else ( <i>specify</i> ) decided ....<br>4. Cost too much .....<br>5. Problem required traditional care ...<br>6. Thought advised care not needed.<br>7. Thought care might harm the child.<br>8. Thought child will die despite care..<br>9. No time before go to next provider.<br>10. The child died too soon.....<br>11. Other ( <i>specify</i> ) .....<br>99. Don't know ..... | S6.21.2<br>1. <input type="checkbox"/><br>2. <input type="checkbox"/><br>3. <input type="checkbox"/><br>4. <input type="checkbox"/><br>5. <input type="checkbox"/><br>6. <input type="checkbox"/><br>7. <input type="checkbox"/><br>8. <input type="checkbox"/><br>9. <input type="checkbox"/><br>10. <input type="checkbox"/><br>11. <input type="checkbox"/><br>99. <input type="checkbox"/>                                                                                                                                                                                                                                                                                                                                                                                    | S6.36.2<br>1. <input type="checkbox"/><br>2. <input type="checkbox"/><br>3. <input type="checkbox"/><br>4. <input type="checkbox"/><br>5. <input type="checkbox"/><br>6. <input type="checkbox"/><br>7. <input type="checkbox"/><br>8. <input type="checkbox"/><br>9. <input type="checkbox"/><br>10. <input type="checkbox"/><br>11. <input type="checkbox"/><br>99. <input type="checkbox"/>                 |     |       |    |                             |                             |                             |                             |                             |                             |                             |                             |                             |                             |                             |                             |                                                                                                                                                                                                                                                                                                                                                                                                                                                                                                                                                                                                                                                                                                                                                                                   |      |     |       |    |                             |                             |                             |                             |                             |                             |                             |                             |                             |                             |                             |                             |
| At the time of leaving the (<FIRST HEALTH PROVIDER> / <LAST HEALTH PROVIDER>), was <NAME>...<br><br><i>[Read the choices for each condition.]</i>                                                                                                                                                                                | 1. Feeding normally, poorly, or not at all.....<br>2. Alert, drowsy, or unconscious .....<br>3. Normally active, less active than normal, or not moving.....                                                                                                                                                                                                                                                                                                                      | S6.22<br><table style="width: 100%; border-collapse: collapse;"> <thead> <tr> <th style="text-align: left;">Nrml</th> <th style="text-align: left;">Med</th> <th style="text-align: left;">Abnrm</th> <th style="text-align: left;">DK</th> </tr> </thead> <tbody> <tr> <td>1. <input type="checkbox"/></td> <td>2. <input type="checkbox"/></td> <td>3. <input type="checkbox"/></td> <td>9. <input type="checkbox"/></td> </tr> <tr> <td>1. <input type="checkbox"/></td> <td>2. <input type="checkbox"/></td> <td>3. <input type="checkbox"/></td> <td>9. <input type="checkbox"/></td> </tr> <tr> <td>1. <input type="checkbox"/></td> <td>2. <input type="checkbox"/></td> <td>3. <input type="checkbox"/></td> <td>9. <input type="checkbox"/></td> </tr> </tbody> </table> | Nrml                                                                                                                                                                                                                                                                                                                                                                                                           | Med | Abnrm | DK | 1. <input type="checkbox"/> | 2. <input type="checkbox"/> | 3. <input type="checkbox"/> | 9. <input type="checkbox"/> | 1. <input type="checkbox"/> | 2. <input type="checkbox"/> | 3. <input type="checkbox"/> | 9. <input type="checkbox"/> | 1. <input type="checkbox"/> | 2. <input type="checkbox"/> | 3. <input type="checkbox"/> | 9. <input type="checkbox"/> | S6.37<br><table style="width: 100%; border-collapse: collapse;"> <thead> <tr> <th style="text-align: left;">Nrml</th> <th style="text-align: left;">Med</th> <th style="text-align: left;">Abnrm</th> <th style="text-align: left;">DK</th> </tr> </thead> <tbody> <tr> <td>1. <input type="checkbox"/></td> <td>2. <input type="checkbox"/></td> <td>3. <input type="checkbox"/></td> <td>9. <input type="checkbox"/></td> </tr> <tr> <td>1. <input type="checkbox"/></td> <td>2. <input type="checkbox"/></td> <td>3. <input type="checkbox"/></td> <td>9. <input type="checkbox"/></td> </tr> <tr> <td>1. <input type="checkbox"/></td> <td>2. <input type="checkbox"/></td> <td>3. <input type="checkbox"/></td> <td>9. <input type="checkbox"/></td> </tr> </tbody> </table> | Nrml | Med | Abnrm | DK | 1. <input type="checkbox"/> | 2. <input type="checkbox"/> | 3. <input type="checkbox"/> | 9. <input type="checkbox"/> | 1. <input type="checkbox"/> | 2. <input type="checkbox"/> | 3. <input type="checkbox"/> | 9. <input type="checkbox"/> | 1. <input type="checkbox"/> | 2. <input type="checkbox"/> | 3. <input type="checkbox"/> | 9. <input type="checkbox"/> |
| Nrml                                                                                                                                                                                                                                                                                                                             | Med                                                                                                                                                                                                                                                                                                                                                                                                                                                                               | Abnrm                                                                                                                                                                                                                                                                                                                                                                                                                                                                                                                                                                                                                                                                                                                                                                             | DK                                                                                                                                                                                                                                                                                                                                                                                                             |     |       |    |                             |                             |                             |                             |                             |                             |                             |                             |                             |                             |                             |                             |                                                                                                                                                                                                                                                                                                                                                                                                                                                                                                                                                                                                                                                                                                                                                                                   |      |     |       |    |                             |                             |                             |                             |                             |                             |                             |                             |                             |                             |                             |                             |
| 1. <input type="checkbox"/>                                                                                                                                                                                                                                                                                                      | 2. <input type="checkbox"/>                                                                                                                                                                                                                                                                                                                                                                                                                                                       | 3. <input type="checkbox"/>                                                                                                                                                                                                                                                                                                                                                                                                                                                                                                                                                                                                                                                                                                                                                       | 9. <input type="checkbox"/>                                                                                                                                                                                                                                                                                                                                                                                    |     |       |    |                             |                             |                             |                             |                             |                             |                             |                             |                             |                             |                             |                             |                                                                                                                                                                                                                                                                                                                                                                                                                                                                                                                                                                                                                                                                                                                                                                                   |      |     |       |    |                             |                             |                             |                             |                             |                             |                             |                             |                             |                             |                             |                             |
| 1. <input type="checkbox"/>                                                                                                                                                                                                                                                                                                      | 2. <input type="checkbox"/>                                                                                                                                                                                                                                                                                                                                                                                                                                                       | 3. <input type="checkbox"/>                                                                                                                                                                                                                                                                                                                                                                                                                                                                                                                                                                                                                                                                                                                                                       | 9. <input type="checkbox"/>                                                                                                                                                                                                                                                                                                                                                                                    |     |       |    |                             |                             |                             |                             |                             |                             |                             |                             |                             |                             |                             |                             |                                                                                                                                                                                                                                                                                                                                                                                                                                                                                                                                                                                                                                                                                                                                                                                   |      |     |       |    |                             |                             |                             |                             |                             |                             |                             |                             |                             |                             |                             |                             |
| 1. <input type="checkbox"/>                                                                                                                                                                                                                                                                                                      | 2. <input type="checkbox"/>                                                                                                                                                                                                                                                                                                                                                                                                                                                       | 3. <input type="checkbox"/>                                                                                                                                                                                                                                                                                                                                                                                                                                                                                                                                                                                                                                                                                                                                                       | 9. <input type="checkbox"/>                                                                                                                                                                                                                                                                                                                                                                                    |     |       |    |                             |                             |                             |                             |                             |                             |                             |                             |                             |                             |                             |                             |                                                                                                                                                                                                                                                                                                                                                                                                                                                                                                                                                                                                                                                                                                                                                                                   |      |     |       |    |                             |                             |                             |                             |                             |                             |                             |                             |                             |                             |                             |                             |
| Nrml                                                                                                                                                                                                                                                                                                                             | Med                                                                                                                                                                                                                                                                                                                                                                                                                                                                               | Abnrm                                                                                                                                                                                                                                                                                                                                                                                                                                                                                                                                                                                                                                                                                                                                                                             | DK                                                                                                                                                                                                                                                                                                                                                                                                             |     |       |    |                             |                             |                             |                             |                             |                             |                             |                             |                             |                             |                             |                             |                                                                                                                                                                                                                                                                                                                                                                                                                                                                                                                                                                                                                                                                                                                                                                                   |      |     |       |    |                             |                             |                             |                             |                             |                             |                             |                             |                             |                             |                             |                             |
| 1. <input type="checkbox"/>                                                                                                                                                                                                                                                                                                      | 2. <input type="checkbox"/>                                                                                                                                                                                                                                                                                                                                                                                                                                                       | 3. <input type="checkbox"/>                                                                                                                                                                                                                                                                                                                                                                                                                                                                                                                                                                                                                                                                                                                                                       | 9. <input type="checkbox"/>                                                                                                                                                                                                                                                                                                                                                                                    |     |       |    |                             |                             |                             |                             |                             |                             |                             |                             |                             |                             |                             |                             |                                                                                                                                                                                                                                                                                                                                                                                                                                                                                                                                                                                                                                                                                                                                                                                   |      |     |       |    |                             |                             |                             |                             |                             |                             |                             |                             |                             |                             |                             |                             |
| 1. <input type="checkbox"/>                                                                                                                                                                                                                                                                                                      | 2. <input type="checkbox"/>                                                                                                                                                                                                                                                                                                                                                                                                                                                       | 3. <input type="checkbox"/>                                                                                                                                                                                                                                                                                                                                                                                                                                                                                                                                                                                                                                                                                                                                                       | 9. <input type="checkbox"/>                                                                                                                                                                                                                                                                                                                                                                                    |     |       |    |                             |                             |                             |                             |                             |                             |                             |                             |                             |                             |                             |                             |                                                                                                                                                                                                                                                                                                                                                                                                                                                                                                                                                                                                                                                                                                                                                                                   |      |     |       |    |                             |                             |                             |                             |                             |                             |                             |                             |                             |                             |                             |                             |
| 1. <input type="checkbox"/>                                                                                                                                                                                                                                                                                                      | 2. <input type="checkbox"/>                                                                                                                                                                                                                                                                                                                                                                                                                                                       | 3. <input type="checkbox"/>                                                                                                                                                                                                                                                                                                                                                                                                                                                                                                                                                                                                                                                                                                                                                       | 9. <input type="checkbox"/>                                                                                                                                                                                                                                                                                                                                                                                    |     |       |    |                             |                             |                             |                             |                             |                             |                             |                             |                             |                             |                             |                             |                                                                                                                                                                                                                                                                                                                                                                                                                                                                                                                                                                                                                                                                                                                                                                                   |      |     |       |    |                             |                             |                             |                             |                             |                             |                             |                             |                             |                             |                             |                             |
| <i>If <u>not taken</u> to another health provider, ask:</i><br>Did you have any concerns or problems that kept you from taking <NAME> to another health provider?<br><br><i>If <u>taken</u> to another health provider, ask:</i><br>Did you have to overcome any concerns or problems to take <NAME> to another health provider? | 1. Yes<br>2. No<br>9. Don't know                                                                                                                                                                                                                                                                                                                                                                                                                                                  | S6.23<br><input type="checkbox"/> <b>2 or 9</b> → <b>Inst_4</b>                                                                                                                                                                                                                                                                                                                                                                                                                                                                                                                                                                                                                                                                                                                   | S6.38<br><input type="checkbox"/> <b>2 or 9</b> → <b>SQ6.39</b>                                                                                                                                                                                                                                                                                                                                                |     |       |    |                             |                             |                             |                             |                             |                             |                             |                             |                             |                             |                             |                             |                                                                                                                                                                                                                                                                                                                                                                                                                                                                                                                                                                                                                                                                                                                                                                                   |      |     |       |    |                             |                             |                             |                             |                             |                             |                             |                             |                             |                             |                             |                             |

Study ID# 

|  |  |  |  |
|--|--|--|--|
|  |  |  |  |
|--|--|--|--|

|  |  |  |
|--|--|--|
|  |  |  |
|--|--|--|

|  |  |
|--|--|
|  |  |
|--|--|

  
Village/Cluster HH Child

**CHILD HEALTH EPIDEMIOLOGY REFERENCE GROUP  
SB/NN/CHILD VERBAL/SOCIAL AUTOPSY QUESTIONNAIRE**

|                                                                                                                                   |                                                                                                                                                                                                                                                                                                                                                                                                                                                                                                                                                                                                                                                                                                                                                        |                                                                                                                                                                                                                                                                                                                                                                                                                                                                                                                                                                                                                                                          |                                                                                                                                                                                                                                                                                                                                                                                                                                                                                                                                                                                                                                          |
|-----------------------------------------------------------------------------------------------------------------------------------|--------------------------------------------------------------------------------------------------------------------------------------------------------------------------------------------------------------------------------------------------------------------------------------------------------------------------------------------------------------------------------------------------------------------------------------------------------------------------------------------------------------------------------------------------------------------------------------------------------------------------------------------------------------------------------------------------------------------------------------------------------|----------------------------------------------------------------------------------------------------------------------------------------------------------------------------------------------------------------------------------------------------------------------------------------------------------------------------------------------------------------------------------------------------------------------------------------------------------------------------------------------------------------------------------------------------------------------------------------------------------------------------------------------------------|------------------------------------------------------------------------------------------------------------------------------------------------------------------------------------------------------------------------------------------------------------------------------------------------------------------------------------------------------------------------------------------------------------------------------------------------------------------------------------------------------------------------------------------------------------------------------------------------------------------------------------------|
| <p>What concerns or problems did you have?<br/><i>Prompt: Was there anything else?</i><br/><i>[Multiple answers allowed.]</i></p> | <ol style="list-style-type: none"> <li>1. Thought no more care needed .....</li> <li>2. No one available to go with her .....</li> <li>3. Too much time from regular duties.</li> <li>4. Someone else (<i>specify</i>) decided ....</li> <li>5. Too far to travel .....</li> <li>6. No transportation available.....</li> <li>7. Cost (transport, health care, other).</li> <li>8. Not satisfied with available care .....</li> <li>9. Problem required traditional care ...</li> <li>10. Thought child too sick to travel ....</li> <li>11. Thought child will die despite care</li> <li>12. Was late at night .....</li> <li>13. The child died before going.....</li> <li>14. Other (<i>specify</i>) .....</li> <li>99. Don't know .....</li> </ol> | <p>S6.23.1</p> <ol style="list-style-type: none"> <li>1. <input type="checkbox"/></li> <li>2. <input type="checkbox"/></li> <li>3. <input type="checkbox"/></li> <li>4. <input type="checkbox"/></li> <li>5. <input type="checkbox"/></li> <li>6. <input type="checkbox"/></li> <li>7. <input type="checkbox"/></li> <li>8. <input type="checkbox"/></li> <li>9. <input type="checkbox"/></li> <li>10. <input type="checkbox"/></li> <li>11. <input type="checkbox"/></li> <li>12. <input type="checkbox"/></li> <li>13. <input type="checkbox"/> → <b>SQ6.39</b></li> <li>14. <input type="checkbox"/></li> <li>99. <input type="checkbox"/></li> </ol> | <p>S6.38.1</p> <ol style="list-style-type: none"> <li>1. <input type="checkbox"/></li> <li>2. <input type="checkbox"/></li> <li>3. <input type="checkbox"/></li> <li>4. <input type="checkbox"/></li> <li>5. <input type="checkbox"/></li> <li>6. <input type="checkbox"/></li> <li>7. <input type="checkbox"/></li> <li>8. <input type="checkbox"/></li> <li>9. <input type="checkbox"/></li> <li>10. <input type="checkbox"/></li> <li>11. <input type="checkbox"/></li> <li>12. <input type="checkbox"/></li> <li>13. <input type="checkbox"/></li> <li>14. <input type="checkbox"/></li> <li>99. <input type="checkbox"/></li> </ol> |
|-----------------------------------------------------------------------------------------------------------------------------------|--------------------------------------------------------------------------------------------------------------------------------------------------------------------------------------------------------------------------------------------------------------------------------------------------------------------------------------------------------------------------------------------------------------------------------------------------------------------------------------------------------------------------------------------------------------------------------------------------------------------------------------------------------------------------------------------------------------------------------------------------------|----------------------------------------------------------------------------------------------------------------------------------------------------------------------------------------------------------------------------------------------------------------------------------------------------------------------------------------------------------------------------------------------------------------------------------------------------------------------------------------------------------------------------------------------------------------------------------------------------------------------------------------------------------|------------------------------------------------------------------------------------------------------------------------------------------------------------------------------------------------------------------------------------------------------------------------------------------------------------------------------------------------------------------------------------------------------------------------------------------------------------------------------------------------------------------------------------------------------------------------------------------------------------------------------------------|

**Inst\_4: Check SQ6.5 → If taken to another health provider... → go to SQ6.24 (LAST PROVIDER)**

|       |                                                                                                                                                                                                                                             |                                             |
|-------|---------------------------------------------------------------------------------------------------------------------------------------------------------------------------------------------------------------------------------------------|---------------------------------------------|
| S6.39 | <p>How many days after (first noticing the illness / &lt;LAST ACTION SQ6.5&gt; / leaving the first/last health provider) did &lt;NAME&gt; die?<br/><i>[If SQ6.4 = 2 (No care given), then read: "...first noticing the illness..."]</i></p> | <p>_____ Days<br/>(&lt;1 = 00; DK = 99)</p> |
|-------|---------------------------------------------------------------------------------------------------------------------------------------------------------------------------------------------------------------------------------------------|---------------------------------------------|

**Inst\_5: If SQ6.4 = 2 (No care given) or if SQ6.5 ≠ "Health Provider" (Never took and never tried to take to a health provider) → VQ5.10**

**VA Section 5: Health records (FOR STILLBIRTHS, NEONATAL & CHILD DEATHS 0—59 MONTHS OLD)**

|                   |                                                               |                                                                                                                                                                                                                                                                                                                                                                                                                                                                                                                                                                                                                                                                                                                                                                                                                                                                                                                                                                                                                                                                                                                                                                                                                                                                                                                                                                                                                                                                                                                                                                                                                                                                                                                                                                                                                                                                                                                                                                                          |                                          |   |       |             |   |  |       |             |  |   |   |   |   |   |   |   |   |                   |  |  |  |  |  |  |  |  |  |  |  |  |  |  |  |   |   |   |   |   |   |   |   |                   |  |  |  |  |  |  |  |
|-------------------|---------------------------------------------------------------|------------------------------------------------------------------------------------------------------------------------------------------------------------------------------------------------------------------------------------------------------------------------------------------------------------------------------------------------------------------------------------------------------------------------------------------------------------------------------------------------------------------------------------------------------------------------------------------------------------------------------------------------------------------------------------------------------------------------------------------------------------------------------------------------------------------------------------------------------------------------------------------------------------------------------------------------------------------------------------------------------------------------------------------------------------------------------------------------------------------------------------------------------------------------------------------------------------------------------------------------------------------------------------------------------------------------------------------------------------------------------------------------------------------------------------------------------------------------------------------------------------------------------------------------------------------------------------------------------------------------------------------------------------------------------------------------------------------------------------------------------------------------------------------------------------------------------------------------------------------------------------------------------------------------------------------------------------------------------------------|------------------------------------------|---|-------|-------------|---|--|-------|-------------|--|---|---|---|---|---|---|---|---|-------------------|--|--|--|--|--|--|--|--|--|--|--|--|--|--|--|---|---|---|---|---|---|---|---|-------------------|--|--|--|--|--|--|--|
| V5.4              | Do you have any health records that belonged to the deceased? | <ol style="list-style-type: none"> <li>1. Yes</li> <li>2. No</li> <li>9. Don't know</li> </ol>                                                                                                                                                                                                                                                                                                                                                                                                                                                                                                                                                                                                                                                                                                                                                                                                                                                                                                                                                                                                                                                                                                                                                                                                                                                                                                                                                                                                                                                                                                                                                                                                                                                                                                                                                                                                                                                                                           | <input type="checkbox"/> 2 or 9 → VQ5.10 |   |       |             |   |  |       |             |  |   |   |   |   |   |   |   |   |                   |  |  |  |  |  |  |  |  |  |  |  |  |  |  |  |   |   |   |   |   |   |   |   |                   |  |  |  |  |  |  |  |
| V5.5              | Can I see the health records?                                 | <ol style="list-style-type: none"> <li>1. Yes</li> <li>2. No</li> </ol>                                                                                                                                                                                                                                                                                                                                                                                                                                                                                                                                                                                                                                                                                                                                                                                                                                                                                                                                                                                                                                                                                                                                                                                                                                                                                                                                                                                                                                                                                                                                                                                                                                                                                                                                                                                                                                                                                                                  | <input type="checkbox"/> 2 → VQ5.10      |   |       |             |   |  |       |             |  |   |   |   |   |   |   |   |   |                   |  |  |  |  |  |  |  |  |  |  |  |  |  |  |  |   |   |   |   |   |   |   |   |                   |  |  |  |  |  |  |  |
| V5.6              | Record the dates of the two most recent visits                | <table style="margin: auto;"> <tr> <td style="border-bottom: 1px solid black; width: 20px;"></td> </tr> <tr> <td style="text-align: center;">D</td> <td style="text-align: center;">D</td> <td style="text-align: center;">M</td> <td style="text-align: center;">M</td> <td style="text-align: center;">Y</td> <td style="text-align: center;">Y</td> <td style="text-align: center;">Y</td> <td style="text-align: center;">Y</td> </tr> <tr> <td colspan="8" style="text-align: center;">(DK = 99/99/9999)</td> </tr> </table><br><table style="margin: auto;"> <tr> <td style="border-bottom: 1px solid black; width: 20px;"></td> </tr> <tr> <td style="text-align: center;">D</td> <td style="text-align: center;">D</td> <td style="text-align: center;">M</td> <td style="text-align: center;">M</td> <td style="text-align: center;">Y</td> <td style="text-align: center;">Y</td> <td style="text-align: center;">Y</td> <td style="text-align: center;">Y</td> </tr> <tr> <td colspan="8" style="text-align: center;">(DK = 99/99/9999)</td> </tr> </table> |                                          |   |       |             |   |  |       |             |  | D | D | M | M | Y | Y | Y | Y | (DK = 99/99/9999) |  |  |  |  |  |  |  |  |  |  |  |  |  |  |  | D | D | M | M | Y | Y | Y | Y | (DK = 99/99/9999) |  |  |  |  |  |  |  |
|                   |                                                               |                                                                                                                                                                                                                                                                                                                                                                                                                                                                                                                                                                                                                                                                                                                                                                                                                                                                                                                                                                                                                                                                                                                                                                                                                                                                                                                                                                                                                                                                                                                                                                                                                                                                                                                                                                                                                                                                                                                                                                                          |                                          |   |       |             |   |  |       |             |  |   |   |   |   |   |   |   |   |                   |  |  |  |  |  |  |  |  |  |  |  |  |  |  |  |   |   |   |   |   |   |   |   |                   |  |  |  |  |  |  |  |
| D                 | D                                                             | M                                                                                                                                                                                                                                                                                                                                                                                                                                                                                                                                                                                                                                                                                                                                                                                                                                                                                                                                                                                                                                                                                                                                                                                                                                                                                                                                                                                                                                                                                                                                                                                                                                                                                                                                                                                                                                                                                                                                                                                        | M                                        | Y | Y     | Y           | Y |  |       |             |  |   |   |   |   |   |   |   |   |                   |  |  |  |  |  |  |  |  |  |  |  |  |  |  |  |   |   |   |   |   |   |   |   |                   |  |  |  |  |  |  |  |
| (DK = 99/99/9999) |                                                               |                                                                                                                                                                                                                                                                                                                                                                                                                                                                                                                                                                                                                                                                                                                                                                                                                                                                                                                                                                                                                                                                                                                                                                                                                                                                                                                                                                                                                                                                                                                                                                                                                                                                                                                                                                                                                                                                                                                                                                                          |                                          |   |       |             |   |  |       |             |  |   |   |   |   |   |   |   |   |                   |  |  |  |  |  |  |  |  |  |  |  |  |  |  |  |   |   |   |   |   |   |   |   |                   |  |  |  |  |  |  |  |
|                   |                                                               |                                                                                                                                                                                                                                                                                                                                                                                                                                                                                                                                                                                                                                                                                                                                                                                                                                                                                                                                                                                                                                                                                                                                                                                                                                                                                                                                                                                                                                                                                                                                                                                                                                                                                                                                                                                                                                                                                                                                                                                          |                                          |   |       |             |   |  |       |             |  |   |   |   |   |   |   |   |   |                   |  |  |  |  |  |  |  |  |  |  |  |  |  |  |  |   |   |   |   |   |   |   |   |                   |  |  |  |  |  |  |  |
| D                 | D                                                             | M                                                                                                                                                                                                                                                                                                                                                                                                                                                                                                                                                                                                                                                                                                                                                                                                                                                                                                                                                                                                                                                                                                                                                                                                                                                                                                                                                                                                                                                                                                                                                                                                                                                                                                                                                                                                                                                                                                                                                                                        | M                                        | Y | Y     | Y           | Y |  |       |             |  |   |   |   |   |   |   |   |   |                   |  |  |  |  |  |  |  |  |  |  |  |  |  |  |  |   |   |   |   |   |   |   |   |                   |  |  |  |  |  |  |  |
| (DK = 99/99/9999) |                                                               |                                                                                                                                                                                                                                                                                                                                                                                                                                                                                                                                                                                                                                                                                                                                                                                                                                                                                                                                                                                                                                                                                                                                                                                                                                                                                                                                                                                                                                                                                                                                                                                                                                                                                                                                                                                                                                                                                                                                                                                          |                                          |   |       |             |   |  |       |             |  |   |   |   |   |   |   |   |   |                   |  |  |  |  |  |  |  |  |  |  |  |  |  |  |  |   |   |   |   |   |   |   |   |                   |  |  |  |  |  |  |  |
| V5.7              | Record the two most recent weights on those dates             | <table style="margin: auto;"> <tr> <td style="border-bottom: 1px solid black; width: 40px;"></td> <td style="text-align: right;">Grams</td> </tr> <tr> <td colspan="2" style="text-align: center;">(DK = 9999)</td> </tr> <tr> <td style="border-bottom: 1px solid black; width: 40px;"></td> <td style="text-align: right;">Grams</td> </tr> <tr> <td colspan="2" style="text-align: center;">(DK = 9999)</td> </tr> </table>                                                                                                                                                                                                                                                                                                                                                                                                                                                                                                                                                                                                                                                                                                                                                                                                                                                                                                                                                                                                                                                                                                                                                                                                                                                                                                                                                                                                                                                                                                                                                           |                                          |   | Grams | (DK = 9999) |   |  | Grams | (DK = 9999) |  |   |   |   |   |   |   |   |   |                   |  |  |  |  |  |  |  |  |  |  |  |  |  |  |  |   |   |   |   |   |   |   |   |                   |  |  |  |  |  |  |  |
|                   | Grams                                                         |                                                                                                                                                                                                                                                                                                                                                                                                                                                                                                                                                                                                                                                                                                                                                                                                                                                                                                                                                                                                                                                                                                                                                                                                                                                                                                                                                                                                                                                                                                                                                                                                                                                                                                                                                                                                                                                                                                                                                                                          |                                          |   |       |             |   |  |       |             |  |   |   |   |   |   |   |   |   |                   |  |  |  |  |  |  |  |  |  |  |  |  |  |  |  |   |   |   |   |   |   |   |   |                   |  |  |  |  |  |  |  |
| (DK = 9999)       |                                                               |                                                                                                                                                                                                                                                                                                                                                                                                                                                                                                                                                                                                                                                                                                                                                                                                                                                                                                                                                                                                                                                                                                                                                                                                                                                                                                                                                                                                                                                                                                                                                                                                                                                                                                                                                                                                                                                                                                                                                                                          |                                          |   |       |             |   |  |       |             |  |   |   |   |   |   |   |   |   |                   |  |  |  |  |  |  |  |  |  |  |  |  |  |  |  |   |   |   |   |   |   |   |   |                   |  |  |  |  |  |  |  |
|                   | Grams                                                         |                                                                                                                                                                                                                                                                                                                                                                                                                                                                                                                                                                                                                                                                                                                                                                                                                                                                                                                                                                                                                                                                                                                                                                                                                                                                                                                                                                                                                                                                                                                                                                                                                                                                                                                                                                                                                                                                                                                                                                                          |                                          |   |       |             |   |  |       |             |  |   |   |   |   |   |   |   |   |                   |  |  |  |  |  |  |  |  |  |  |  |  |  |  |  |   |   |   |   |   |   |   |   |                   |  |  |  |  |  |  |  |
| (DK = 9999)       |                                                               |                                                                                                                                                                                                                                                                                                                                                                                                                                                                                                                                                                                                                                                                                                                                                                                                                                                                                                                                                                                                                                                                                                                                                                                                                                                                                                                                                                                                                                                                                                                                                                                                                                                                                                                                                                                                                                                                                                                                                                                          |                                          |   |       |             |   |  |       |             |  |   |   |   |   |   |   |   |   |                   |  |  |  |  |  |  |  |  |  |  |  |  |  |  |  |   |   |   |   |   |   |   |   |                   |  |  |  |  |  |  |  |
| V5.8              | Record the date of the last note                              | <table style="margin: auto;"> <tr> <td style="border-bottom: 1px solid black; width: 20px;"></td> </tr> <tr> <td style="text-align: center;">D</td> <td style="text-align: center;">D</td> <td style="text-align: center;">M</td> <td style="text-align: center;">M</td> <td style="text-align: center;">Y</td> <td style="text-align: center;">Y</td> <td style="text-align: center;">Y</td> <td style="text-align: center;">Y</td> </tr> <tr> <td colspan="8" style="text-align: center;">(DK = 99/99/9999)</td> </tr> </table>                                                                                                                                                                                                                                                                                                                                                                                                                                                                                                                                                                                                                                                                                                                                                                                                                                                                                                                                                                                               |                                          |   |       |             |   |  |       |             |  | D | D | M | M | Y | Y | Y | Y | (DK = 99/99/9999) |  |  |  |  |  |  |  |  |  |  |  |  |  |  |  |   |   |   |   |   |   |   |   |                   |  |  |  |  |  |  |  |
|                   |                                                               |                                                                                                                                                                                                                                                                                                                                                                                                                                                                                                                                                                                                                                                                                                                                                                                                                                                                                                                                                                                                                                                                                                                                                                                                                                                                                                                                                                                                                                                                                                                                                                                                                                                                                                                                                                                                                                                                                                                                                                                          |                                          |   |       |             |   |  |       |             |  |   |   |   |   |   |   |   |   |                   |  |  |  |  |  |  |  |  |  |  |  |  |  |  |  |   |   |   |   |   |   |   |   |                   |  |  |  |  |  |  |  |
| D                 | D                                                             | M                                                                                                                                                                                                                                                                                                                                                                                                                                                                                                                                                                                                                                                                                                                                                                                                                                                                                                                                                                                                                                                                                                                                                                                                                                                                                                                                                                                                                                                                                                                                                                                                                                                                                                                                                                                                                                                                                                                                                                                        | M                                        | Y | Y     | Y           | Y |  |       |             |  |   |   |   |   |   |   |   |   |                   |  |  |  |  |  |  |  |  |  |  |  |  |  |  |  |   |   |   |   |   |   |   |   |                   |  |  |  |  |  |  |  |
| (DK = 99/99/9999) |                                                               |                                                                                                                                                                                                                                                                                                                                                                                                                                                                                                                                                                                                                                                                                                                                                                                                                                                                                                                                                                                                                                                                                                                                                                                                                                                                                                                                                                                                                                                                                                                                                                                                                                                                                                                                                                                                                                                                                                                                                                                          |                                          |   |       |             |   |  |       |             |  |   |   |   |   |   |   |   |   |                   |  |  |  |  |  |  |  |  |  |  |  |  |  |  |  |   |   |   |   |   |   |   |   |                   |  |  |  |  |  |  |  |

|       |                                                                               |                                  |                                         |
|-------|-------------------------------------------------------------------------------|----------------------------------|-----------------------------------------|
| V5.9  | <i>Transcribe the note</i>                                                    |                                  |                                         |
|       | <hr/>                   |                                  |                                         |
| V5.10 | Was a death certificate issued?                                               | 1. Yes<br>2. No<br>9. Don't know | <input type="checkbox"/> 2 or 9 → SQ1.1 |
| V5.11 | Can I see the death certificate?                                              | 1. Yes<br>2. No                  | <input type="checkbox"/> 2 → SQ1.1      |
| V5.12 | <i>Record the immediate cause of death from the death certificate</i>         |                                  |                                         |
| V5.13 | <i>Record the first underlying cause of death from the death certificate</i>  |                                  |                                         |
| V5.14 | <i>Record the second underlying cause of death from the death certificate</i> |                                  |                                         |
| V5.15 | <i>Record the third underlying cause of death from the death certificate</i>  |                                  |                                         |
| V5.16 | <i>Record the contributing cause of death from the death certificate</i>      |                                  |                                         |

**SA Module 1: The mother and her household (FOR STILLBIRTHS, NN & CHILD DEATHS 0—59 MONTHS OLD)**

*Read:* Now I would like to ask you some other questions about (yourself / the child's mother).

*[Read "...the child's mother." if the respondent is not the mother.]*

**Inst\_1: If GQ4.3 = 1 (Respondent is the mother) → SQ1.4**

|        |                                                                                                                                                                                                                                                         |                                          |
|--------|---------------------------------------------------------------------------------------------------------------------------------------------------------------------------------------------------------------------------------------------------------|------------------------------------------|
| S1.2   | How old (is the child's mother / was the child's mother when she died)?<br><i>[Read "...was the child's mother..." if she died.]</i>                                                                                                                    | ____ ____ Years<br>(DK = 99)             |
| S1.3   | How many years of school did the mother complete?                                                                                                                                                                                                       | ____ ____ Years<br>(<1 = 00; DK = 99)    |
| S1.4   | (Are you / Is/Was the child's mother)...<br><i>[Read "...Is/Was the child's mother..." if the respondent is not the mother.]</i><br><i>[Read the choices to the respondent.]</i>                                                                        | <input type="checkbox"/> 5 or 9 → Inst_2 |
| S1.4.1 | How old (were you when you / was she when she) first married (or lived with a man)?<br><i>[Read "...was she when she..." if the respondent is not the mother.]</i><br><i>[Read "...married or lived with a man?" if SQ1.4 = "2. Living with a man"]</i> | ____ ____ Years<br>(DK = 99)             |

Study ID#

|                 |  |  |  |    |  |  |       |  |  |
|-----------------|--|--|--|----|--|--|-------|--|--|
|                 |  |  |  |    |  |  |       |  |  |
| Village/Cluster |  |  |  | HH |  |  | Child |  |  |

**CHILD HEALTH EPIDEMIOLOGY REFERENCE GROUP  
SB/NN/CHILD VERBAL/SOCIAL AUTOPSY QUESTIONNAIRE**

|                                                                                                                                                                                                                                                                                                                                                                                                                                               |                                                                                                                                                                                                                                                                                                                                             |                                                                                                                                                                                                                                                                                                                                                                                                                                                                                |                                                                                                                                                                                              |
|-----------------------------------------------------------------------------------------------------------------------------------------------------------------------------------------------------------------------------------------------------------------------------------------------------------------------------------------------------------------------------------------------------------------------------------------------|---------------------------------------------------------------------------------------------------------------------------------------------------------------------------------------------------------------------------------------------------------------------------------------------------------------------------------------------|--------------------------------------------------------------------------------------------------------------------------------------------------------------------------------------------------------------------------------------------------------------------------------------------------------------------------------------------------------------------------------------------------------------------------------------------------------------------------------|----------------------------------------------------------------------------------------------------------------------------------------------------------------------------------------------|
| S1.4.2                                                                                                                                                                                                                                                                                                                                                                                                                                        | <p>How many years of school did (your / her) (husband / partner) complete?</p> <p><i>[Read "...her..." if the respondent is not the mother.]</i><br/> <i>[Read "...partner..." if she is living with a man.]</i></p>                                                                                                                        | <p style="text-align: center;">____ Years<br/>(&lt;1 = 00; DK = 99)</p>                                                                                                                                                                                                                                                                                                                                                                                                        |                                                                                                                                                                                              |
| <p><b>Inst 2:</b> Read: Now I would like to ask you some questions about (your / the mother's) household. Please remember that all information will be kept confidential.</p> <p><i>[SBs &amp; NN deaths: If the respondent is not the mother, read "...the mother's..." and ask SQ1.5–1.11 about the mother's household.</i></p> <p><i>[Older deaths: Always read "...your..." and ask SQ1.5–1.11 about the respondent's household.]</i></p> |                                                                                                                                                                                                                                                                                                                                             |                                                                                                                                                                                                                                                                                                                                                                                                                                                                                |                                                                                                                                                                                              |
| S1.5                                                                                                                                                                                                                                                                                                                                                                                                                                          | <p>Who was the main breadwinner of (your / the mother's) family during the (last days of the pregnancy / child's fatal illness)</p> <p><i>[SBs/NN deaths: Read "...last days..."; Older deaths: Read "...child's..."]</i></p>                                                                                                               | <ol style="list-style-type: none"> <li>1. Child's father</li> <li>2. Child's mother</li> <li>3. Other</li> <li>9. Don't know</li> </ol>                                                                                                                                                                                                                                                                                                                                        | <p style="text-align: center;"><input type="checkbox"/> 9 → SQ1.7</p>                                                                                                                        |
| S1.6                                                                                                                                                                                                                                                                                                                                                                                                                                          | <p>At that time, what kind of work did the main breadwinner mostly do?</p>                                                                                                                                                                                                                                                                  | <ol style="list-style-type: none"> <li>1. Farmer/agricultural worker</li> <li>2. Poultry or cattle raising</li> <li>3. Domestic servant</li> <li>4. Home-based manufacturing</li> <li>5. Unskilled laborer</li> <li>6. Semi-skilled laborer/service provider</li> <li>7. Factory worker, blue collar service</li> <li>8. Business owner</li> <li>9. Professional/technician</li> <li>10. Other (specify) .....</li> <li>11. Overseas worker</li> <li>99. Don't know</li> </ol> | <p style="text-align: center;"><input type="checkbox"/> <input type="checkbox"/></p>                                                                                                         |
| S1.7                                                                                                                                                                                                                                                                                                                                                                                                                                          | <p>Is this the house (where we are now) where (you / the mother) stayed during the (last days of the pregnancy / child's fatal illness)?</p> <p><i>[SBs/NN deaths: Read "...last days..." Older deaths: Read "...child's..."]</i></p> <p><i>[Read "...where we are now..." if needed to clarify which house you are talking about.]</i></p> | <ol style="list-style-type: none"> <li>1. Yes</li> <li>2. No</li> <li>9. Don't know</li> </ol>                                                                                                                                                                                                                                                                                                                                                                                 | <p style="text-align: center;"><input type="checkbox"/> 1 → SQ1.10<br/>9 → VQ5.17</p>                                                                                                        |
| S1.8                                                                                                                                                                                                                                                                                                                                                                                                                                          | <p>Where did (you / the mother) stay at that time?</p> <p><i>Probe: Where did (you / the mother) stay during the illness events?</i></p> <p><i>[Mark "1" only if her usual residence was not her in-laws or other relatives.]</i></p>                                                                                                       | <ol style="list-style-type: none"> <li>1. Her own home at that time (other than with her in-laws) (<i>Interviewer: Use this code just if she moved after the death.</i>)</li> <li>2. Her in-law's home</li> <li>3. Her parent's home</li> <li>4. Her brother's home</li> <li>5. Other (specify) .....</li> <li>9. Don't know</li> </ol>                                                                                                                                        | <p style="text-align: center;"><input type="checkbox"/> 9 → VQ5.17</p>                                                                                                                       |
| S1.9                                                                                                                                                                                                                                                                                                                                                                                                                                          | <p>What is the address of the place where (you / she) stayed?</p>                                                                                                                                                                                                                                                                           | <p>State _____</p> <p>LGA _____</p>                                                                                                                                                                                                                                                                                                                                                                                                                                            | <p style="text-align: center;"><input type="checkbox"/> <input type="checkbox"/> <input type="checkbox"/><br/><input type="checkbox"/> <input type="checkbox"/> <input type="checkbox"/></p> |
| S1.10                                                                                                                                                                                                                                                                                                                                                                                                                                         | <p>At the time of the illness events, how long had (you / the mother / your &lt;RELATIVES&gt; / the mother's &lt;RELATIVES&gt;) been living continuously in (this / that) community?</p> <p><i>[Read "...&lt;RELATIVES..." if SQ1.8 = 2-5 (s/he stayed with her/his relatives)].</i></p>                                                    |                                                                                                                                                                                                                                                                                                                                                                                                                                                                                | <p style="text-align: center;">____ Years<br/>(&lt;1 = 00; DK = 99)</p>                                                                                                                      |
| S1.11                                                                                                                                                                                                                                                                                                                                                                                                                                         | <p>How long does it take to reach the health provider or facility where (you / the mother) normally (go(es) / went) from (this / that) place?</p>                                                                                                                                                                                           |                                                                                                                                                                                                                                                                                                                                                                                                                                                                                | <p style="text-align: center;">____ Hours<br/>(DK = 99)</p>                                                                                                                                  |



Study ID#

|                 |  |  |  |    |  |  |  |       |  |  |  |
|-----------------|--|--|--|----|--|--|--|-------|--|--|--|
|                 |  |  |  |    |  |  |  |       |  |  |  |
| Village/Cluster |  |  |  | HH |  |  |  | Child |  |  |  |

**CHILD HEALTH EPIDEMIOLOGY REFERENCE GROUP  
SB/NN/CHILD VERBAL/SOCIAL AUTOPSY QUESTIONNAIRE**

[Mark hours &/or minutes as needed: e.g. 01 hour, 30 minutes]

\_\_\_\_\_ Minutes  
(DK = 99)

**Inst\_3 → SQ2.1.1 (if including optional Module 2) or VQ5.17**

**SA Module 2: Social capital (OPTIONAL MODULE—FOR SBs, NN & CHILD DEATHS 0–59 MONTHS OLD)**

Read: Now, I have some questions about (your / the mother's / your <RELATIVES'> / the mother's <RELATIVES'>) community.

[SBs and NN deaths: If the respondent is not the mother, read "...the mother's..." or "...the mothers' <RELATIVES'>..." and ask SQ2.1.1–SQ2.3.1 about the mother and her community or her relatives' community.

Older deaths: Always read "...your..." or "...your <RELATIVES'>..." and ask SQ2.1.1–SQ2.3.1 about the respondent and her/his community or her/his relatives' community.

All deaths: Ask about the relatives' community if s/he stayed with her/his relatives during the illness events.]

| S2.1.1                                                          | <p>In the last 3 years, did the people in the (village / neighborhood) work together on any of the following issues that affect the entire community or part of the community?</p> <p><i>Read all the issues and mark ("X") Yes, No or DK for each one; then enter the code.]</i></p>                                                              | <table style="width: 100%; border-collapse: collapse;"> <thead> <tr> <th style="width: 5%;"></th> <th style="width: 15%; text-align: center;">Yes</th> <th style="width: 15%; text-align: center;">No</th> <th style="width: 15%; text-align: center;">DK</th> </tr> </thead> <tbody> <tr><td>1. Education/schools .....</td><td>1. <input type="checkbox"/></td><td>2. <input type="checkbox"/></td><td>9. <input type="checkbox"/></td></tr> <tr><td>2. Health services/clinics .....</td><td>1. <input type="checkbox"/></td><td>2. <input type="checkbox"/></td><td>9. <input type="checkbox"/></td></tr> <tr><td>3. Paid job opportunities .....</td><td>1. <input type="checkbox"/></td><td>2. <input type="checkbox"/></td><td>9. <input type="checkbox"/></td></tr> <tr><td>4. Credit/finance .....</td><td>1. <input type="checkbox"/></td><td>2. <input type="checkbox"/></td><td>9. <input type="checkbox"/></td></tr> <tr><td>5. Roads .....</td><td>1. <input type="checkbox"/></td><td>2. <input type="checkbox"/></td><td>9. <input type="checkbox"/></td></tr> <tr><td>6. Public transportation .....</td><td>1. <input type="checkbox"/></td><td>2. <input type="checkbox"/></td><td>9. <input type="checkbox"/></td></tr> <tr><td>7. Water distribution .....</td><td>1. <input type="checkbox"/></td><td>2. <input type="checkbox"/></td><td>9. <input type="checkbox"/></td></tr> <tr><td>8. Sanitation services .....</td><td>1. <input type="checkbox"/></td><td>2. <input type="checkbox"/></td><td>9. <input type="checkbox"/></td></tr> <tr><td>9. Agriculture .....</td><td>1. <input type="checkbox"/></td><td>2. <input type="checkbox"/></td><td>9. <input type="checkbox"/></td></tr> <tr><td>10. Justice/conflict resolution .....</td><td>1. <input type="checkbox"/></td><td>2. <input type="checkbox"/></td><td>9. <input type="checkbox"/></td></tr> <tr><td>11. Security/police services .....</td><td>1. <input type="checkbox"/></td><td>2. <input type="checkbox"/></td><td>9. <input type="checkbox"/></td></tr> <tr><td>12. Mosque/church/temple .....</td><td>1. <input type="checkbox"/></td><td>2. <input type="checkbox"/></td><td>9. <input type="checkbox"/></td></tr> <tr><td>13. Other .....</td><td>1. <input type="checkbox"/></td><td>2. <input type="checkbox"/></td><td>9. <input type="checkbox"/></td></tr> <tr><td colspan="4" style="text-align: center;">(specify) .....</td></tr> </tbody> </table> <p>Code:<br/>1. One or more issues identified<br/>2. No issue identified</p> |                             | Yes | No | DK | 1. Education/schools ..... | 1. <input type="checkbox"/> | 2. <input type="checkbox"/> | 9. <input type="checkbox"/> | 2. Health services/clinics ..... | 1. <input type="checkbox"/> | 2. <input type="checkbox"/> | 9. <input type="checkbox"/> | 3. Paid job opportunities ..... | 1. <input type="checkbox"/> | 2. <input type="checkbox"/> | 9. <input type="checkbox"/> | 4. Credit/finance .....            | 1. <input type="checkbox"/> | 2. <input type="checkbox"/> | 9. <input type="checkbox"/> | 5. Roads .....            | 1. <input type="checkbox"/> | 2. <input type="checkbox"/> | 9. <input type="checkbox"/> | 6. Public transportation ..... | 1. <input type="checkbox"/> | 2. <input type="checkbox"/> | 9. <input type="checkbox"/> | 7. Water distribution .....         | 1. <input type="checkbox"/> | 2. <input type="checkbox"/> | 9. <input type="checkbox"/> | 8. Sanitation services ..... | 1. <input type="checkbox"/> | 2. <input type="checkbox"/> | 9. <input type="checkbox"/> | 9. Agriculture .....                        | 1. <input type="checkbox"/> | 2. <input type="checkbox"/> | 9. <input type="checkbox"/> | 10. Justice/conflict resolution .....                           | 1. <input type="checkbox"/> | 2. <input type="checkbox"/> | 9. <input type="checkbox"/> | 11. Security/police services ..... | 1. <input type="checkbox"/> | 2. <input type="checkbox"/> | 9. <input type="checkbox"/> | 12. Mosque/church/temple ..... | 1. <input type="checkbox"/> | 2. <input type="checkbox"/> | 9. <input type="checkbox"/> | 13. Other ..... | 1. <input type="checkbox"/> | 2. <input type="checkbox"/> | 9. <input type="checkbox"/> | (specify) ..... |  |  |  |
|-----------------------------------------------------------------|----------------------------------------------------------------------------------------------------------------------------------------------------------------------------------------------------------------------------------------------------------------------------------------------------------------------------------------------------|----------------------------------------------------------------------------------------------------------------------------------------------------------------------------------------------------------------------------------------------------------------------------------------------------------------------------------------------------------------------------------------------------------------------------------------------------------------------------------------------------------------------------------------------------------------------------------------------------------------------------------------------------------------------------------------------------------------------------------------------------------------------------------------------------------------------------------------------------------------------------------------------------------------------------------------------------------------------------------------------------------------------------------------------------------------------------------------------------------------------------------------------------------------------------------------------------------------------------------------------------------------------------------------------------------------------------------------------------------------------------------------------------------------------------------------------------------------------------------------------------------------------------------------------------------------------------------------------------------------------------------------------------------------------------------------------------------------------------------------------------------------------------------------------------------------------------------------------------------------------------------------------------------------------------------------------------------------------------------------------------------------------------------------------------------------------------------------------------------------------------------------------------------------------------------------------------------------------------------------------------------------------------------------------------------------------------------------------------------------------------------------------------------------------------------------------------------------------------------------------------------------------------------------------|-----------------------------|-----|----|----|----------------------------|-----------------------------|-----------------------------|-----------------------------|----------------------------------|-----------------------------|-----------------------------|-----------------------------|---------------------------------|-----------------------------|-----------------------------|-----------------------------|------------------------------------|-----------------------------|-----------------------------|-----------------------------|---------------------------|-----------------------------|-----------------------------|-----------------------------|--------------------------------|-----------------------------|-----------------------------|-----------------------------|-------------------------------------|-----------------------------|-----------------------------|-----------------------------|------------------------------|-----------------------------|-----------------------------|-----------------------------|---------------------------------------------|-----------------------------|-----------------------------|-----------------------------|-----------------------------------------------------------------|-----------------------------|-----------------------------|-----------------------------|------------------------------------|-----------------------------|-----------------------------|-----------------------------|--------------------------------|-----------------------------|-----------------------------|-----------------------------|-----------------|-----------------------------|-----------------------------|-----------------------------|-----------------|--|--|--|
|                                                                 | Yes                                                                                                                                                                                                                                                                                                                                                | No                                                                                                                                                                                                                                                                                                                                                                                                                                                                                                                                                                                                                                                                                                                                                                                                                                                                                                                                                                                                                                                                                                                                                                                                                                                                                                                                                                                                                                                                                                                                                                                                                                                                                                                                                                                                                                                                                                                                                                                                                                                                                                                                                                                                                                                                                                                                                                                                                                                                                                                                           | DK                          |     |    |    |                            |                             |                             |                             |                                  |                             |                             |                             |                                 |                             |                             |                             |                                    |                             |                             |                             |                           |                             |                             |                             |                                |                             |                             |                             |                                     |                             |                             |                             |                              |                             |                             |                             |                                             |                             |                             |                             |                                                                 |                             |                             |                             |                                    |                             |                             |                             |                                |                             |                             |                             |                 |                             |                             |                             |                 |  |  |  |
| 1. Education/schools .....                                      | 1. <input type="checkbox"/>                                                                                                                                                                                                                                                                                                                        | 2. <input type="checkbox"/>                                                                                                                                                                                                                                                                                                                                                                                                                                                                                                                                                                                                                                                                                                                                                                                                                                                                                                                                                                                                                                                                                                                                                                                                                                                                                                                                                                                                                                                                                                                                                                                                                                                                                                                                                                                                                                                                                                                                                                                                                                                                                                                                                                                                                                                                                                                                                                                                                                                                                                                  | 9. <input type="checkbox"/> |     |    |    |                            |                             |                             |                             |                                  |                             |                             |                             |                                 |                             |                             |                             |                                    |                             |                             |                             |                           |                             |                             |                             |                                |                             |                             |                             |                                     |                             |                             |                             |                              |                             |                             |                             |                                             |                             |                             |                             |                                                                 |                             |                             |                             |                                    |                             |                             |                             |                                |                             |                             |                             |                 |                             |                             |                             |                 |  |  |  |
| 2. Health services/clinics .....                                | 1. <input type="checkbox"/>                                                                                                                                                                                                                                                                                                                        | 2. <input type="checkbox"/>                                                                                                                                                                                                                                                                                                                                                                                                                                                                                                                                                                                                                                                                                                                                                                                                                                                                                                                                                                                                                                                                                                                                                                                                                                                                                                                                                                                                                                                                                                                                                                                                                                                                                                                                                                                                                                                                                                                                                                                                                                                                                                                                                                                                                                                                                                                                                                                                                                                                                                                  | 9. <input type="checkbox"/> |     |    |    |                            |                             |                             |                             |                                  |                             |                             |                             |                                 |                             |                             |                             |                                    |                             |                             |                             |                           |                             |                             |                             |                                |                             |                             |                             |                                     |                             |                             |                             |                              |                             |                             |                             |                                             |                             |                             |                             |                                                                 |                             |                             |                             |                                    |                             |                             |                             |                                |                             |                             |                             |                 |                             |                             |                             |                 |  |  |  |
| 3. Paid job opportunities .....                                 | 1. <input type="checkbox"/>                                                                                                                                                                                                                                                                                                                        | 2. <input type="checkbox"/>                                                                                                                                                                                                                                                                                                                                                                                                                                                                                                                                                                                                                                                                                                                                                                                                                                                                                                                                                                                                                                                                                                                                                                                                                                                                                                                                                                                                                                                                                                                                                                                                                                                                                                                                                                                                                                                                                                                                                                                                                                                                                                                                                                                                                                                                                                                                                                                                                                                                                                                  | 9. <input type="checkbox"/> |     |    |    |                            |                             |                             |                             |                                  |                             |                             |                             |                                 |                             |                             |                             |                                    |                             |                             |                             |                           |                             |                             |                             |                                |                             |                             |                             |                                     |                             |                             |                             |                              |                             |                             |                             |                                             |                             |                             |                             |                                                                 |                             |                             |                             |                                    |                             |                             |                             |                                |                             |                             |                             |                 |                             |                             |                             |                 |  |  |  |
| 4. Credit/finance .....                                         | 1. <input type="checkbox"/>                                                                                                                                                                                                                                                                                                                        | 2. <input type="checkbox"/>                                                                                                                                                                                                                                                                                                                                                                                                                                                                                                                                                                                                                                                                                                                                                                                                                                                                                                                                                                                                                                                                                                                                                                                                                                                                                                                                                                                                                                                                                                                                                                                                                                                                                                                                                                                                                                                                                                                                                                                                                                                                                                                                                                                                                                                                                                                                                                                                                                                                                                                  | 9. <input type="checkbox"/> |     |    |    |                            |                             |                             |                             |                                  |                             |                             |                             |                                 |                             |                             |                             |                                    |                             |                             |                             |                           |                             |                             |                             |                                |                             |                             |                             |                                     |                             |                             |                             |                              |                             |                             |                             |                                             |                             |                             |                             |                                                                 |                             |                             |                             |                                    |                             |                             |                             |                                |                             |                             |                             |                 |                             |                             |                             |                 |  |  |  |
| 5. Roads .....                                                  | 1. <input type="checkbox"/>                                                                                                                                                                                                                                                                                                                        | 2. <input type="checkbox"/>                                                                                                                                                                                                                                                                                                                                                                                                                                                                                                                                                                                                                                                                                                                                                                                                                                                                                                                                                                                                                                                                                                                                                                                                                                                                                                                                                                                                                                                                                                                                                                                                                                                                                                                                                                                                                                                                                                                                                                                                                                                                                                                                                                                                                                                                                                                                                                                                                                                                                                                  | 9. <input type="checkbox"/> |     |    |    |                            |                             |                             |                             |                                  |                             |                             |                             |                                 |                             |                             |                             |                                    |                             |                             |                             |                           |                             |                             |                             |                                |                             |                             |                             |                                     |                             |                             |                             |                              |                             |                             |                             |                                             |                             |                             |                             |                                                                 |                             |                             |                             |                                    |                             |                             |                             |                                |                             |                             |                             |                 |                             |                             |                             |                 |  |  |  |
| 6. Public transportation .....                                  | 1. <input type="checkbox"/>                                                                                                                                                                                                                                                                                                                        | 2. <input type="checkbox"/>                                                                                                                                                                                                                                                                                                                                                                                                                                                                                                                                                                                                                                                                                                                                                                                                                                                                                                                                                                                                                                                                                                                                                                                                                                                                                                                                                                                                                                                                                                                                                                                                                                                                                                                                                                                                                                                                                                                                                                                                                                                                                                                                                                                                                                                                                                                                                                                                                                                                                                                  | 9. <input type="checkbox"/> |     |    |    |                            |                             |                             |                             |                                  |                             |                             |                             |                                 |                             |                             |                             |                                    |                             |                             |                             |                           |                             |                             |                             |                                |                             |                             |                             |                                     |                             |                             |                             |                              |                             |                             |                             |                                             |                             |                             |                             |                                                                 |                             |                             |                             |                                    |                             |                             |                             |                                |                             |                             |                             |                 |                             |                             |                             |                 |  |  |  |
| 7. Water distribution .....                                     | 1. <input type="checkbox"/>                                                                                                                                                                                                                                                                                                                        | 2. <input type="checkbox"/>                                                                                                                                                                                                                                                                                                                                                                                                                                                                                                                                                                                                                                                                                                                                                                                                                                                                                                                                                                                                                                                                                                                                                                                                                                                                                                                                                                                                                                                                                                                                                                                                                                                                                                                                                                                                                                                                                                                                                                                                                                                                                                                                                                                                                                                                                                                                                                                                                                                                                                                  | 9. <input type="checkbox"/> |     |    |    |                            |                             |                             |                             |                                  |                             |                             |                             |                                 |                             |                             |                             |                                    |                             |                             |                             |                           |                             |                             |                             |                                |                             |                             |                             |                                     |                             |                             |                             |                              |                             |                             |                             |                                             |                             |                             |                             |                                                                 |                             |                             |                             |                                    |                             |                             |                             |                                |                             |                             |                             |                 |                             |                             |                             |                 |  |  |  |
| 8. Sanitation services .....                                    | 1. <input type="checkbox"/>                                                                                                                                                                                                                                                                                                                        | 2. <input type="checkbox"/>                                                                                                                                                                                                                                                                                                                                                                                                                                                                                                                                                                                                                                                                                                                                                                                                                                                                                                                                                                                                                                                                                                                                                                                                                                                                                                                                                                                                                                                                                                                                                                                                                                                                                                                                                                                                                                                                                                                                                                                                                                                                                                                                                                                                                                                                                                                                                                                                                                                                                                                  | 9. <input type="checkbox"/> |     |    |    |                            |                             |                             |                             |                                  |                             |                             |                             |                                 |                             |                             |                             |                                    |                             |                             |                             |                           |                             |                             |                             |                                |                             |                             |                             |                                     |                             |                             |                             |                              |                             |                             |                             |                                             |                             |                             |                             |                                                                 |                             |                             |                             |                                    |                             |                             |                             |                                |                             |                             |                             |                 |                             |                             |                             |                 |  |  |  |
| 9. Agriculture .....                                            | 1. <input type="checkbox"/>                                                                                                                                                                                                                                                                                                                        | 2. <input type="checkbox"/>                                                                                                                                                                                                                                                                                                                                                                                                                                                                                                                                                                                                                                                                                                                                                                                                                                                                                                                                                                                                                                                                                                                                                                                                                                                                                                                                                                                                                                                                                                                                                                                                                                                                                                                                                                                                                                                                                                                                                                                                                                                                                                                                                                                                                                                                                                                                                                                                                                                                                                                  | 9. <input type="checkbox"/> |     |    |    |                            |                             |                             |                             |                                  |                             |                             |                             |                                 |                             |                             |                             |                                    |                             |                             |                             |                           |                             |                             |                             |                                |                             |                             |                             |                                     |                             |                             |                             |                              |                             |                             |                             |                                             |                             |                             |                             |                                                                 |                             |                             |                             |                                    |                             |                             |                             |                                |                             |                             |                             |                 |                             |                             |                             |                 |  |  |  |
| 10. Justice/conflict resolution .....                           | 1. <input type="checkbox"/>                                                                                                                                                                                                                                                                                                                        | 2. <input type="checkbox"/>                                                                                                                                                                                                                                                                                                                                                                                                                                                                                                                                                                                                                                                                                                                                                                                                                                                                                                                                                                                                                                                                                                                                                                                                                                                                                                                                                                                                                                                                                                                                                                                                                                                                                                                                                                                                                                                                                                                                                                                                                                                                                                                                                                                                                                                                                                                                                                                                                                                                                                                  | 9. <input type="checkbox"/> |     |    |    |                            |                             |                             |                             |                                  |                             |                             |                             |                                 |                             |                             |                             |                                    |                             |                             |                             |                           |                             |                             |                             |                                |                             |                             |                             |                                     |                             |                             |                             |                              |                             |                             |                             |                                             |                             |                             |                             |                                                                 |                             |                             |                             |                                    |                             |                             |                             |                                |                             |                             |                             |                 |                             |                             |                             |                 |  |  |  |
| 11. Security/police services .....                              | 1. <input type="checkbox"/>                                                                                                                                                                                                                                                                                                                        | 2. <input type="checkbox"/>                                                                                                                                                                                                                                                                                                                                                                                                                                                                                                                                                                                                                                                                                                                                                                                                                                                                                                                                                                                                                                                                                                                                                                                                                                                                                                                                                                                                                                                                                                                                                                                                                                                                                                                                                                                                                                                                                                                                                                                                                                                                                                                                                                                                                                                                                                                                                                                                                                                                                                                  | 9. <input type="checkbox"/> |     |    |    |                            |                             |                             |                             |                                  |                             |                             |                             |                                 |                             |                             |                             |                                    |                             |                             |                             |                           |                             |                             |                             |                                |                             |                             |                             |                                     |                             |                             |                             |                              |                             |                             |                             |                                             |                             |                             |                             |                                                                 |                             |                             |                             |                                    |                             |                             |                             |                                |                             |                             |                             |                 |                             |                             |                             |                 |  |  |  |
| 12. Mosque/church/temple .....                                  | 1. <input type="checkbox"/>                                                                                                                                                                                                                                                                                                                        | 2. <input type="checkbox"/>                                                                                                                                                                                                                                                                                                                                                                                                                                                                                                                                                                                                                                                                                                                                                                                                                                                                                                                                                                                                                                                                                                                                                                                                                                                                                                                                                                                                                                                                                                                                                                                                                                                                                                                                                                                                                                                                                                                                                                                                                                                                                                                                                                                                                                                                                                                                                                                                                                                                                                                  | 9. <input type="checkbox"/> |     |    |    |                            |                             |                             |                             |                                  |                             |                             |                             |                                 |                             |                             |                             |                                    |                             |                             |                             |                           |                             |                             |                             |                                |                             |                             |                             |                                     |                             |                             |                             |                              |                             |                             |                             |                                             |                             |                             |                             |                                                                 |                             |                             |                             |                                    |                             |                             |                             |                                |                             |                             |                             |                 |                             |                             |                             |                 |  |  |  |
| 13. Other .....                                                 | 1. <input type="checkbox"/>                                                                                                                                                                                                                                                                                                                        | 2. <input type="checkbox"/>                                                                                                                                                                                                                                                                                                                                                                                                                                                                                                                                                                                                                                                                                                                                                                                                                                                                                                                                                                                                                                                                                                                                                                                                                                                                                                                                                                                                                                                                                                                                                                                                                                                                                                                                                                                                                                                                                                                                                                                                                                                                                                                                                                                                                                                                                                                                                                                                                                                                                                                  | 9. <input type="checkbox"/> |     |    |    |                            |                             |                             |                             |                                  |                             |                             |                             |                                 |                             |                             |                             |                                    |                             |                             |                             |                           |                             |                             |                             |                                |                             |                             |                             |                                     |                             |                             |                             |                              |                             |                             |                             |                                             |                             |                             |                             |                                                                 |                             |                             |                             |                                    |                             |                             |                             |                                |                             |                             |                             |                 |                             |                             |                             |                 |  |  |  |
| (specify) .....                                                 |                                                                                                                                                                                                                                                                                                                                                    |                                                                                                                                                                                                                                                                                                                                                                                                                                                                                                                                                                                                                                                                                                                                                                                                                                                                                                                                                                                                                                                                                                                                                                                                                                                                                                                                                                                                                                                                                                                                                                                                                                                                                                                                                                                                                                                                                                                                                                                                                                                                                                                                                                                                                                                                                                                                                                                                                                                                                                                                              |                             |     |    |    |                            |                             |                             |                             |                                  |                             |                             |                             |                                 |                             |                             |                             |                                    |                             |                             |                             |                           |                             |                             |                             |                                |                             |                             |                             |                                     |                             |                             |                             |                              |                             |                             |                             |                                             |                             |                             |                             |                                                                 |                             |                             |                             |                                    |                             |                             |                             |                                |                             |                             |                             |                 |                             |                             |                             |                 |  |  |  |
| S2.2                                                            | <p>(Were you / Was the mother) able to turn to any persons, groups or organizations in the community for help during (the pregnancy / (or) the child's fatal illness)?</p> <p><i>[Read "...the pregnancy?" for SBs; or "...the pregnancy or the child's fatal illness?" for NN deaths; or "...the child's fatal illness for older deaths.]</i></p> | <p>1. Yes<br/>2. No<br/>9. Don't know</p> <p style="text-align: right;"><input type="checkbox"/> 2 or 9 → SQ2.3.1</p>                                                                                                                                                                                                                                                                                                                                                                                                                                                                                                                                                                                                                                                                                                                                                                                                                                                                                                                                                                                                                                                                                                                                                                                                                                                                                                                                                                                                                                                                                                                                                                                                                                                                                                                                                                                                                                                                                                                                                                                                                                                                                                                                                                                                                                                                                                                                                                                                                        |                             |     |    |    |                            |                             |                             |                             |                                  |                             |                             |                             |                                 |                             |                             |                             |                                    |                             |                             |                             |                           |                             |                             |                             |                                |                             |                             |                             |                                     |                             |                             |                             |                              |                             |                             |                             |                                             |                             |                             |                             |                                                                 |                             |                             |                             |                                    |                             |                             |                             |                                |                             |                             |                             |                 |                             |                             |                             |                 |  |  |  |
| S2.2.1                                                          | <p>Did (you / she) turn to any of the following for help?</p> <p><i>[Read all the options and mark ("X") Yes, No or DK for each; then enter the code.]</i></p>                                                                                                                                                                                     | <table style="width: 100%; border-collapse: collapse;"> <thead> <tr> <th style="width: 5%;"></th> <th style="width: 15%; text-align: center;">Yes</th> <th style="width: 15%; text-align: center;">No</th> <th style="width: 15%; text-align: center;">DK</th> </tr> </thead> <tbody> <tr><td>1. Family .....</td><td>1. <input type="checkbox"/></td><td>2. <input type="checkbox"/></td><td>9. <input type="checkbox"/></td></tr> <tr><td>2. Neighbors .....</td><td>1. <input type="checkbox"/></td><td>2. <input type="checkbox"/></td><td>9. <input type="checkbox"/></td></tr> <tr><td>3. Friends .....</td><td>1. <input type="checkbox"/></td><td>2. <input type="checkbox"/></td><td>9. <input type="checkbox"/></td></tr> <tr><td>4. Religious leader or group .....</td><td>1. <input type="checkbox"/></td><td>2. <input type="checkbox"/></td><td>9. <input type="checkbox"/></td></tr> <tr><td>5. Community leader .....</td><td>1. <input type="checkbox"/></td><td>2. <input type="checkbox"/></td><td>9. <input type="checkbox"/></td></tr> <tr><td>6. Police .....</td><td>1. <input type="checkbox"/></td><td>2. <input type="checkbox"/></td><td>9. <input type="checkbox"/></td></tr> <tr><td>7. Patron/employer/benefactor .....</td><td>1. <input type="checkbox"/></td><td>2. <input type="checkbox"/></td><td>9. <input type="checkbox"/></td></tr> <tr><td>8. Political leader .....</td><td>1. <input type="checkbox"/></td><td>2. <input type="checkbox"/></td><td>9. <input type="checkbox"/></td></tr> <tr><td>9. Mutual support group s/he belongs to ...</td><td>1. <input type="checkbox"/></td><td>2. <input type="checkbox"/></td><td>9. <input type="checkbox"/></td></tr> <tr><td>10. Assistance organization to which s/he does not belong .....</td><td>1. <input type="checkbox"/></td><td>2. <input type="checkbox"/></td><td>9. <input type="checkbox"/></td></tr> <tr><td>11. Other .....</td><td>1. <input type="checkbox"/></td><td>2. <input type="checkbox"/></td><td>9. <input type="checkbox"/></td></tr> <tr><td colspan="4" style="text-align: center;">(specify) .....</td></tr> </tbody> </table>                                                                                                                                                                                                                                                                                                                                                                                       |                             | Yes | No | DK | 1. Family .....            | 1. <input type="checkbox"/> | 2. <input type="checkbox"/> | 9. <input type="checkbox"/> | 2. Neighbors .....               | 1. <input type="checkbox"/> | 2. <input type="checkbox"/> | 9. <input type="checkbox"/> | 3. Friends .....                | 1. <input type="checkbox"/> | 2. <input type="checkbox"/> | 9. <input type="checkbox"/> | 4. Religious leader or group ..... | 1. <input type="checkbox"/> | 2. <input type="checkbox"/> | 9. <input type="checkbox"/> | 5. Community leader ..... | 1. <input type="checkbox"/> | 2. <input type="checkbox"/> | 9. <input type="checkbox"/> | 6. Police .....                | 1. <input type="checkbox"/> | 2. <input type="checkbox"/> | 9. <input type="checkbox"/> | 7. Patron/employer/benefactor ..... | 1. <input type="checkbox"/> | 2. <input type="checkbox"/> | 9. <input type="checkbox"/> | 8. Political leader .....    | 1. <input type="checkbox"/> | 2. <input type="checkbox"/> | 9. <input type="checkbox"/> | 9. Mutual support group s/he belongs to ... | 1. <input type="checkbox"/> | 2. <input type="checkbox"/> | 9. <input type="checkbox"/> | 10. Assistance organization to which s/he does not belong ..... | 1. <input type="checkbox"/> | 2. <input type="checkbox"/> | 9. <input type="checkbox"/> | 11. Other .....                    | 1. <input type="checkbox"/> | 2. <input type="checkbox"/> | 9. <input type="checkbox"/> | (specify) .....                |                             |                             |                             |                 |                             |                             |                             |                 |  |  |  |
|                                                                 | Yes                                                                                                                                                                                                                                                                                                                                                | No                                                                                                                                                                                                                                                                                                                                                                                                                                                                                                                                                                                                                                                                                                                                                                                                                                                                                                                                                                                                                                                                                                                                                                                                                                                                                                                                                                                                                                                                                                                                                                                                                                                                                                                                                                                                                                                                                                                                                                                                                                                                                                                                                                                                                                                                                                                                                                                                                                                                                                                                           | DK                          |     |    |    |                            |                             |                             |                             |                                  |                             |                             |                             |                                 |                             |                             |                             |                                    |                             |                             |                             |                           |                             |                             |                             |                                |                             |                             |                             |                                     |                             |                             |                             |                              |                             |                             |                             |                                             |                             |                             |                             |                                                                 |                             |                             |                             |                                    |                             |                             |                             |                                |                             |                             |                             |                 |                             |                             |                             |                 |  |  |  |
| 1. Family .....                                                 | 1. <input type="checkbox"/>                                                                                                                                                                                                                                                                                                                        | 2. <input type="checkbox"/>                                                                                                                                                                                                                                                                                                                                                                                                                                                                                                                                                                                                                                                                                                                                                                                                                                                                                                                                                                                                                                                                                                                                                                                                                                                                                                                                                                                                                                                                                                                                                                                                                                                                                                                                                                                                                                                                                                                                                                                                                                                                                                                                                                                                                                                                                                                                                                                                                                                                                                                  | 9. <input type="checkbox"/> |     |    |    |                            |                             |                             |                             |                                  |                             |                             |                             |                                 |                             |                             |                             |                                    |                             |                             |                             |                           |                             |                             |                             |                                |                             |                             |                             |                                     |                             |                             |                             |                              |                             |                             |                             |                                             |                             |                             |                             |                                                                 |                             |                             |                             |                                    |                             |                             |                             |                                |                             |                             |                             |                 |                             |                             |                             |                 |  |  |  |
| 2. Neighbors .....                                              | 1. <input type="checkbox"/>                                                                                                                                                                                                                                                                                                                        | 2. <input type="checkbox"/>                                                                                                                                                                                                                                                                                                                                                                                                                                                                                                                                                                                                                                                                                                                                                                                                                                                                                                                                                                                                                                                                                                                                                                                                                                                                                                                                                                                                                                                                                                                                                                                                                                                                                                                                                                                                                                                                                                                                                                                                                                                                                                                                                                                                                                                                                                                                                                                                                                                                                                                  | 9. <input type="checkbox"/> |     |    |    |                            |                             |                             |                             |                                  |                             |                             |                             |                                 |                             |                             |                             |                                    |                             |                             |                             |                           |                             |                             |                             |                                |                             |                             |                             |                                     |                             |                             |                             |                              |                             |                             |                             |                                             |                             |                             |                             |                                                                 |                             |                             |                             |                                    |                             |                             |                             |                                |                             |                             |                             |                 |                             |                             |                             |                 |  |  |  |
| 3. Friends .....                                                | 1. <input type="checkbox"/>                                                                                                                                                                                                                                                                                                                        | 2. <input type="checkbox"/>                                                                                                                                                                                                                                                                                                                                                                                                                                                                                                                                                                                                                                                                                                                                                                                                                                                                                                                                                                                                                                                                                                                                                                                                                                                                                                                                                                                                                                                                                                                                                                                                                                                                                                                                                                                                                                                                                                                                                                                                                                                                                                                                                                                                                                                                                                                                                                                                                                                                                                                  | 9. <input type="checkbox"/> |     |    |    |                            |                             |                             |                             |                                  |                             |                             |                             |                                 |                             |                             |                             |                                    |                             |                             |                             |                           |                             |                             |                             |                                |                             |                             |                             |                                     |                             |                             |                             |                              |                             |                             |                             |                                             |                             |                             |                             |                                                                 |                             |                             |                             |                                    |                             |                             |                             |                                |                             |                             |                             |                 |                             |                             |                             |                 |  |  |  |
| 4. Religious leader or group .....                              | 1. <input type="checkbox"/>                                                                                                                                                                                                                                                                                                                        | 2. <input type="checkbox"/>                                                                                                                                                                                                                                                                                                                                                                                                                                                                                                                                                                                                                                                                                                                                                                                                                                                                                                                                                                                                                                                                                                                                                                                                                                                                                                                                                                                                                                                                                                                                                                                                                                                                                                                                                                                                                                                                                                                                                                                                                                                                                                                                                                                                                                                                                                                                                                                                                                                                                                                  | 9. <input type="checkbox"/> |     |    |    |                            |                             |                             |                             |                                  |                             |                             |                             |                                 |                             |                             |                             |                                    |                             |                             |                             |                           |                             |                             |                             |                                |                             |                             |                             |                                     |                             |                             |                             |                              |                             |                             |                             |                                             |                             |                             |                             |                                                                 |                             |                             |                             |                                    |                             |                             |                             |                                |                             |                             |                             |                 |                             |                             |                             |                 |  |  |  |
| 5. Community leader .....                                       | 1. <input type="checkbox"/>                                                                                                                                                                                                                                                                                                                        | 2. <input type="checkbox"/>                                                                                                                                                                                                                                                                                                                                                                                                                                                                                                                                                                                                                                                                                                                                                                                                                                                                                                                                                                                                                                                                                                                                                                                                                                                                                                                                                                                                                                                                                                                                                                                                                                                                                                                                                                                                                                                                                                                                                                                                                                                                                                                                                                                                                                                                                                                                                                                                                                                                                                                  | 9. <input type="checkbox"/> |     |    |    |                            |                             |                             |                             |                                  |                             |                             |                             |                                 |                             |                             |                             |                                    |                             |                             |                             |                           |                             |                             |                             |                                |                             |                             |                             |                                     |                             |                             |                             |                              |                             |                             |                             |                                             |                             |                             |                             |                                                                 |                             |                             |                             |                                    |                             |                             |                             |                                |                             |                             |                             |                 |                             |                             |                             |                 |  |  |  |
| 6. Police .....                                                 | 1. <input type="checkbox"/>                                                                                                                                                                                                                                                                                                                        | 2. <input type="checkbox"/>                                                                                                                                                                                                                                                                                                                                                                                                                                                                                                                                                                                                                                                                                                                                                                                                                                                                                                                                                                                                                                                                                                                                                                                                                                                                                                                                                                                                                                                                                                                                                                                                                                                                                                                                                                                                                                                                                                                                                                                                                                                                                                                                                                                                                                                                                                                                                                                                                                                                                                                  | 9. <input type="checkbox"/> |     |    |    |                            |                             |                             |                             |                                  |                             |                             |                             |                                 |                             |                             |                             |                                    |                             |                             |                             |                           |                             |                             |                             |                                |                             |                             |                             |                                     |                             |                             |                             |                              |                             |                             |                             |                                             |                             |                             |                             |                                                                 |                             |                             |                             |                                    |                             |                             |                             |                                |                             |                             |                             |                 |                             |                             |                             |                 |  |  |  |
| 7. Patron/employer/benefactor .....                             | 1. <input type="checkbox"/>                                                                                                                                                                                                                                                                                                                        | 2. <input type="checkbox"/>                                                                                                                                                                                                                                                                                                                                                                                                                                                                                                                                                                                                                                                                                                                                                                                                                                                                                                                                                                                                                                                                                                                                                                                                                                                                                                                                                                                                                                                                                                                                                                                                                                                                                                                                                                                                                                                                                                                                                                                                                                                                                                                                                                                                                                                                                                                                                                                                                                                                                                                  | 9. <input type="checkbox"/> |     |    |    |                            |                             |                             |                             |                                  |                             |                             |                             |                                 |                             |                             |                             |                                    |                             |                             |                             |                           |                             |                             |                             |                                |                             |                             |                             |                                     |                             |                             |                             |                              |                             |                             |                             |                                             |                             |                             |                             |                                                                 |                             |                             |                             |                                    |                             |                             |                             |                                |                             |                             |                             |                 |                             |                             |                             |                 |  |  |  |
| 8. Political leader .....                                       | 1. <input type="checkbox"/>                                                                                                                                                                                                                                                                                                                        | 2. <input type="checkbox"/>                                                                                                                                                                                                                                                                                                                                                                                                                                                                                                                                                                                                                                                                                                                                                                                                                                                                                                                                                                                                                                                                                                                                                                                                                                                                                                                                                                                                                                                                                                                                                                                                                                                                                                                                                                                                                                                                                                                                                                                                                                                                                                                                                                                                                                                                                                                                                                                                                                                                                                                  | 9. <input type="checkbox"/> |     |    |    |                            |                             |                             |                             |                                  |                             |                             |                             |                                 |                             |                             |                             |                                    |                             |                             |                             |                           |                             |                             |                             |                                |                             |                             |                             |                                     |                             |                             |                             |                              |                             |                             |                             |                                             |                             |                             |                             |                                                                 |                             |                             |                             |                                    |                             |                             |                             |                                |                             |                             |                             |                 |                             |                             |                             |                 |  |  |  |
| 9. Mutual support group s/he belongs to ...                     | 1. <input type="checkbox"/>                                                                                                                                                                                                                                                                                                                        | 2. <input type="checkbox"/>                                                                                                                                                                                                                                                                                                                                                                                                                                                                                                                                                                                                                                                                                                                                                                                                                                                                                                                                                                                                                                                                                                                                                                                                                                                                                                                                                                                                                                                                                                                                                                                                                                                                                                                                                                                                                                                                                                                                                                                                                                                                                                                                                                                                                                                                                                                                                                                                                                                                                                                  | 9. <input type="checkbox"/> |     |    |    |                            |                             |                             |                             |                                  |                             |                             |                             |                                 |                             |                             |                             |                                    |                             |                             |                             |                           |                             |                             |                             |                                |                             |                             |                             |                                     |                             |                             |                             |                              |                             |                             |                             |                                             |                             |                             |                             |                                                                 |                             |                             |                             |                                    |                             |                             |                             |                                |                             |                             |                             |                 |                             |                             |                             |                 |  |  |  |
| 10. Assistance organization to which s/he does not belong ..... | 1. <input type="checkbox"/>                                                                                                                                                                                                                                                                                                                        | 2. <input type="checkbox"/>                                                                                                                                                                                                                                                                                                                                                                                                                                                                                                                                                                                                                                                                                                                                                                                                                                                                                                                                                                                                                                                                                                                                                                                                                                                                                                                                                                                                                                                                                                                                                                                                                                                                                                                                                                                                                                                                                                                                                                                                                                                                                                                                                                                                                                                                                                                                                                                                                                                                                                                  | 9. <input type="checkbox"/> |     |    |    |                            |                             |                             |                             |                                  |                             |                             |                             |                                 |                             |                             |                             |                                    |                             |                             |                             |                           |                             |                             |                             |                                |                             |                             |                             |                                     |                             |                             |                             |                              |                             |                             |                             |                                             |                             |                             |                             |                                                                 |                             |                             |                             |                                    |                             |                             |                             |                                |                             |                             |                             |                 |                             |                             |                             |                 |  |  |  |
| 11. Other .....                                                 | 1. <input type="checkbox"/>                                                                                                                                                                                                                                                                                                                        | 2. <input type="checkbox"/>                                                                                                                                                                                                                                                                                                                                                                                                                                                                                                                                                                                                                                                                                                                                                                                                                                                                                                                                                                                                                                                                                                                                                                                                                                                                                                                                                                                                                                                                                                                                                                                                                                                                                                                                                                                                                                                                                                                                                                                                                                                                                                                                                                                                                                                                                                                                                                                                                                                                                                                  | 9. <input type="checkbox"/> |     |    |    |                            |                             |                             |                             |                                  |                             |                             |                             |                                 |                             |                             |                             |                                    |                             |                             |                             |                           |                             |                             |                             |                                |                             |                             |                             |                                     |                             |                             |                             |                              |                             |                             |                             |                                             |                             |                             |                             |                                                                 |                             |                             |                             |                                    |                             |                             |                             |                                |                             |                             |                             |                 |                             |                             |                             |                 |  |  |  |
| (specify) .....                                                 |                                                                                                                                                                                                                                                                                                                                                    |                                                                                                                                                                                                                                                                                                                                                                                                                                                                                                                                                                                                                                                                                                                                                                                                                                                                                                                                                                                                                                                                                                                                                                                                                                                                                                                                                                                                                                                                                                                                                                                                                                                                                                                                                                                                                                                                                                                                                                                                                                                                                                                                                                                                                                                                                                                                                                                                                                                                                                                                              |                             |     |    |    |                            |                             |                             |                             |                                  |                             |                             |                             |                                 |                             |                             |                             |                                    |                             |                             |                             |                           |                             |                             |                             |                                |                             |                             |                             |                                     |                             |                             |                             |                              |                             |                             |                             |                                             |                             |                             |                             |                                                                 |                             |                             |                             |                                    |                             |                             |                             |                                |                             |                             |                             |                 |                             |                             |                             |                 |  |  |  |

Study ID#

|                 |  |  |  |    |  |  |  |       |  |  |  |
|-----------------|--|--|--|----|--|--|--|-------|--|--|--|
|                 |  |  |  |    |  |  |  |       |  |  |  |
| Village/Cluster |  |  |  | HH |  |  |  | Child |  |  |  |

**CHILD HEALTH EPIDEMIOLOGY REFERENCE GROUP  
SB/NN/CHILD VERBAL/SOCIAL AUTOPSY QUESTIONNAIRE**

|        |                                                                                                                                                                                                                    |                                                                                                                                                                                                                                                                                                                                                                                                                                       |                                                                                                                                                                                                                                                                                                                                                                                                                                                                                                                                                                                                                                                                                                                                                                                                                                                                                                                                                                                                                                                                                                                                                                                                                                                                                                                                                                                                                                                                                                                                                                                                                                                                                                                                                                                                                                                                                                                                                                                                                                                                                                                                                                                                                                                                                                                                                                                                                                                                                                                                                                                             |  |            |           |           |    |                          |                          |                          |    |                          |                          |                          |    |                          |                          |                          |    |                          |                          |                          |    |                          |                          |                          |    |                          |                          |                          |    |                          |                          |                          |    |                          |                          |                          |    |                          |                          |                          |     |                          |                          |                          |     |                          |                          |                          |
|--------|--------------------------------------------------------------------------------------------------------------------------------------------------------------------------------------------------------------------|---------------------------------------------------------------------------------------------------------------------------------------------------------------------------------------------------------------------------------------------------------------------------------------------------------------------------------------------------------------------------------------------------------------------------------------|---------------------------------------------------------------------------------------------------------------------------------------------------------------------------------------------------------------------------------------------------------------------------------------------------------------------------------------------------------------------------------------------------------------------------------------------------------------------------------------------------------------------------------------------------------------------------------------------------------------------------------------------------------------------------------------------------------------------------------------------------------------------------------------------------------------------------------------------------------------------------------------------------------------------------------------------------------------------------------------------------------------------------------------------------------------------------------------------------------------------------------------------------------------------------------------------------------------------------------------------------------------------------------------------------------------------------------------------------------------------------------------------------------------------------------------------------------------------------------------------------------------------------------------------------------------------------------------------------------------------------------------------------------------------------------------------------------------------------------------------------------------------------------------------------------------------------------------------------------------------------------------------------------------------------------------------------------------------------------------------------------------------------------------------------------------------------------------------------------------------------------------------------------------------------------------------------------------------------------------------------------------------------------------------------------------------------------------------------------------------------------------------------------------------------------------------------------------------------------------------------------------------------------------------------------------------------------------------|--|------------|-----------|-----------|----|--------------------------|--------------------------|--------------------------|----|--------------------------|--------------------------|--------------------------|----|--------------------------|--------------------------|--------------------------|----|--------------------------|--------------------------|--------------------------|----|--------------------------|--------------------------|--------------------------|----|--------------------------|--------------------------|--------------------------|----|--------------------------|--------------------------|--------------------------|----|--------------------------|--------------------------|--------------------------|----|--------------------------|--------------------------|--------------------------|-----|--------------------------|--------------------------|--------------------------|-----|--------------------------|--------------------------|--------------------------|
|        |                                                                                                                                                                                                                    | <p><i>Code:</i></p> <p>1. One person/group identified</p> <p>2. Two or more persons/groups identified</p> <p>3. No person/group identified</p>                                                                                                                                                                                                                                                                                        | <input type="checkbox"/> 3 → <b>SQ2.3.1</b>                                                                                                                                                                                                                                                                                                                                                                                                                                                                                                                                                                                                                                                                                                                                                                                                                                                                                                                                                                                                                                                                                                                                                                                                                                                                                                                                                                                                                                                                                                                                                                                                                                                                                                                                                                                                                                                                                                                                                                                                                                                                                                                                                                                                                                                                                                                                                                                                                                                                                                                                                 |  |            |           |           |    |                          |                          |                          |    |                          |                          |                          |    |                          |                          |                          |    |                          |                          |                          |    |                          |                          |                          |    |                          |                          |                          |    |                          |                          |                          |    |                          |                          |                          |    |                          |                          |                          |     |                          |                          |                          |     |                          |                          |                          |
| S2.2.2 | (Is this / Are these) the same person(s) or group(s) (you / she) would usually turn to for help with a serious problem?                                                                                            | <p>1. Yes</p> <p>2. No</p> <p>9. Don't know</p>                                                                                                                                                                                                                                                                                                                                                                                       | <input type="checkbox"/>                                                                                                                                                                                                                                                                                                                                                                                                                                                                                                                                                                                                                                                                                                                                                                                                                                                                                                                                                                                                                                                                                                                                                                                                                                                                                                                                                                                                                                                                                                                                                                                                                                                                                                                                                                                                                                                                                                                                                                                                                                                                                                                                                                                                                                                                                                                                                                                                                                                                                                                                                                    |  |            |           |           |    |                          |                          |                          |    |                          |                          |                          |    |                          |                          |                          |    |                          |                          |                          |    |                          |                          |                          |    |                          |                          |                          |    |                          |                          |                          |    |                          |                          |                          |    |                          |                          |                          |     |                          |                          |                          |     |                          |                          |                          |
| S2.3.1 | <p>(Have you or your / Has the mother or her) family ever been denied any of the following community services?</p> <p><i>Read all the options and mark ("X") Yes, No or DK for each; then enter the code.]</i></p> | <p>1. Education/schools .....</p> <p>2. Health services/clinics .....</p> <p>3. Paid job opportunities .....</p> <p>4. Credit/finance .....</p> <p>5. Transportation .....</p> <p>6. Water distribution .....</p> <p>7. Sanitation services .....</p> <p>8. Agricultural extension .....</p> <p>9. Justice/conflict resolution.....</p> <p>10. Security/police services .....</p> <p>11. Other .....</p> <p><i>(specify).....</i></p> | <table border="0"> <tr> <td></td> <td style="text-align: center;"><u>Yes</u></td> <td style="text-align: center;"><u>No</u></td> <td style="text-align: center;"><u>DK</u></td> </tr> <tr> <td>1.</td> <td style="text-align: center;"><input type="checkbox"/></td> <td style="text-align: center;"><input type="checkbox"/></td> <td style="text-align: center;"><input type="checkbox"/></td> </tr> <tr> <td>2.</td> <td style="text-align: center;"><input type="checkbox"/></td> <td style="text-align: center;"><input type="checkbox"/></td> <td style="text-align: center;"><input type="checkbox"/></td> </tr> <tr> <td>3.</td> <td style="text-align: center;"><input type="checkbox"/></td> <td style="text-align: center;"><input type="checkbox"/></td> <td style="text-align: center;"><input type="checkbox"/></td> </tr> <tr> <td>4.</td> <td style="text-align: center;"><input type="checkbox"/></td> <td style="text-align: center;"><input type="checkbox"/></td> <td style="text-align: center;"><input type="checkbox"/></td> </tr> <tr> <td>5.</td> <td style="text-align: center;"><input type="checkbox"/></td> <td style="text-align: center;"><input type="checkbox"/></td> <td style="text-align: center;"><input type="checkbox"/></td> </tr> <tr> <td>6.</td> <td style="text-align: center;"><input type="checkbox"/></td> <td style="text-align: center;"><input type="checkbox"/></td> <td style="text-align: center;"><input type="checkbox"/></td> </tr> <tr> <td>7.</td> <td style="text-align: center;"><input type="checkbox"/></td> <td style="text-align: center;"><input type="checkbox"/></td> <td style="text-align: center;"><input type="checkbox"/></td> </tr> <tr> <td>8.</td> <td style="text-align: center;"><input type="checkbox"/></td> <td style="text-align: center;"><input type="checkbox"/></td> <td style="text-align: center;"><input type="checkbox"/></td> </tr> <tr> <td>9.</td> <td style="text-align: center;"><input type="checkbox"/></td> <td style="text-align: center;"><input type="checkbox"/></td> <td style="text-align: center;"><input type="checkbox"/></td> </tr> <tr> <td>10.</td> <td style="text-align: center;"><input type="checkbox"/></td> <td style="text-align: center;"><input type="checkbox"/></td> <td style="text-align: center;"><input type="checkbox"/></td> </tr> <tr> <td>11.</td> <td style="text-align: center;"><input type="checkbox"/></td> <td style="text-align: center;"><input type="checkbox"/></td> <td style="text-align: center;"><input type="checkbox"/></td> </tr> </table> |  | <u>Yes</u> | <u>No</u> | <u>DK</u> | 1. | <input type="checkbox"/> | <input type="checkbox"/> | <input type="checkbox"/> | 2. | <input type="checkbox"/> | <input type="checkbox"/> | <input type="checkbox"/> | 3. | <input type="checkbox"/> | <input type="checkbox"/> | <input type="checkbox"/> | 4. | <input type="checkbox"/> | <input type="checkbox"/> | <input type="checkbox"/> | 5. | <input type="checkbox"/> | <input type="checkbox"/> | <input type="checkbox"/> | 6. | <input type="checkbox"/> | <input type="checkbox"/> | <input type="checkbox"/> | 7. | <input type="checkbox"/> | <input type="checkbox"/> | <input type="checkbox"/> | 8. | <input type="checkbox"/> | <input type="checkbox"/> | <input type="checkbox"/> | 9. | <input type="checkbox"/> | <input type="checkbox"/> | <input type="checkbox"/> | 10. | <input type="checkbox"/> | <input type="checkbox"/> | <input type="checkbox"/> | 11. | <input type="checkbox"/> | <input type="checkbox"/> | <input type="checkbox"/> |
|        | <u>Yes</u>                                                                                                                                                                                                         | <u>No</u>                                                                                                                                                                                                                                                                                                                                                                                                                             | <u>DK</u>                                                                                                                                                                                                                                                                                                                                                                                                                                                                                                                                                                                                                                                                                                                                                                                                                                                                                                                                                                                                                                                                                                                                                                                                                                                                                                                                                                                                                                                                                                                                                                                                                                                                                                                                                                                                                                                                                                                                                                                                                                                                                                                                                                                                                                                                                                                                                                                                                                                                                                                                                                                   |  |            |           |           |    |                          |                          |                          |    |                          |                          |                          |    |                          |                          |                          |    |                          |                          |                          |    |                          |                          |                          |    |                          |                          |                          |    |                          |                          |                          |    |                          |                          |                          |    |                          |                          |                          |     |                          |                          |                          |     |                          |                          |                          |
| 1.     | <input type="checkbox"/>                                                                                                                                                                                           | <input type="checkbox"/>                                                                                                                                                                                                                                                                                                                                                                                                              | <input type="checkbox"/>                                                                                                                                                                                                                                                                                                                                                                                                                                                                                                                                                                                                                                                                                                                                                                                                                                                                                                                                                                                                                                                                                                                                                                                                                                                                                                                                                                                                                                                                                                                                                                                                                                                                                                                                                                                                                                                                                                                                                                                                                                                                                                                                                                                                                                                                                                                                                                                                                                                                                                                                                                    |  |            |           |           |    |                          |                          |                          |    |                          |                          |                          |    |                          |                          |                          |    |                          |                          |                          |    |                          |                          |                          |    |                          |                          |                          |    |                          |                          |                          |    |                          |                          |                          |    |                          |                          |                          |     |                          |                          |                          |     |                          |                          |                          |
| 2.     | <input type="checkbox"/>                                                                                                                                                                                           | <input type="checkbox"/>                                                                                                                                                                                                                                                                                                                                                                                                              | <input type="checkbox"/>                                                                                                                                                                                                                                                                                                                                                                                                                                                                                                                                                                                                                                                                                                                                                                                                                                                                                                                                                                                                                                                                                                                                                                                                                                                                                                                                                                                                                                                                                                                                                                                                                                                                                                                                                                                                                                                                                                                                                                                                                                                                                                                                                                                                                                                                                                                                                                                                                                                                                                                                                                    |  |            |           |           |    |                          |                          |                          |    |                          |                          |                          |    |                          |                          |                          |    |                          |                          |                          |    |                          |                          |                          |    |                          |                          |                          |    |                          |                          |                          |    |                          |                          |                          |    |                          |                          |                          |     |                          |                          |                          |     |                          |                          |                          |
| 3.     | <input type="checkbox"/>                                                                                                                                                                                           | <input type="checkbox"/>                                                                                                                                                                                                                                                                                                                                                                                                              | <input type="checkbox"/>                                                                                                                                                                                                                                                                                                                                                                                                                                                                                                                                                                                                                                                                                                                                                                                                                                                                                                                                                                                                                                                                                                                                                                                                                                                                                                                                                                                                                                                                                                                                                                                                                                                                                                                                                                                                                                                                                                                                                                                                                                                                                                                                                                                                                                                                                                                                                                                                                                                                                                                                                                    |  |            |           |           |    |                          |                          |                          |    |                          |                          |                          |    |                          |                          |                          |    |                          |                          |                          |    |                          |                          |                          |    |                          |                          |                          |    |                          |                          |                          |    |                          |                          |                          |    |                          |                          |                          |     |                          |                          |                          |     |                          |                          |                          |
| 4.     | <input type="checkbox"/>                                                                                                                                                                                           | <input type="checkbox"/>                                                                                                                                                                                                                                                                                                                                                                                                              | <input type="checkbox"/>                                                                                                                                                                                                                                                                                                                                                                                                                                                                                                                                                                                                                                                                                                                                                                                                                                                                                                                                                                                                                                                                                                                                                                                                                                                                                                                                                                                                                                                                                                                                                                                                                                                                                                                                                                                                                                                                                                                                                                                                                                                                                                                                                                                                                                                                                                                                                                                                                                                                                                                                                                    |  |            |           |           |    |                          |                          |                          |    |                          |                          |                          |    |                          |                          |                          |    |                          |                          |                          |    |                          |                          |                          |    |                          |                          |                          |    |                          |                          |                          |    |                          |                          |                          |    |                          |                          |                          |     |                          |                          |                          |     |                          |                          |                          |
| 5.     | <input type="checkbox"/>                                                                                                                                                                                           | <input type="checkbox"/>                                                                                                                                                                                                                                                                                                                                                                                                              | <input type="checkbox"/>                                                                                                                                                                                                                                                                                                                                                                                                                                                                                                                                                                                                                                                                                                                                                                                                                                                                                                                                                                                                                                                                                                                                                                                                                                                                                                                                                                                                                                                                                                                                                                                                                                                                                                                                                                                                                                                                                                                                                                                                                                                                                                                                                                                                                                                                                                                                                                                                                                                                                                                                                                    |  |            |           |           |    |                          |                          |                          |    |                          |                          |                          |    |                          |                          |                          |    |                          |                          |                          |    |                          |                          |                          |    |                          |                          |                          |    |                          |                          |                          |    |                          |                          |                          |    |                          |                          |                          |     |                          |                          |                          |     |                          |                          |                          |
| 6.     | <input type="checkbox"/>                                                                                                                                                                                           | <input type="checkbox"/>                                                                                                                                                                                                                                                                                                                                                                                                              | <input type="checkbox"/>                                                                                                                                                                                                                                                                                                                                                                                                                                                                                                                                                                                                                                                                                                                                                                                                                                                                                                                                                                                                                                                                                                                                                                                                                                                                                                                                                                                                                                                                                                                                                                                                                                                                                                                                                                                                                                                                                                                                                                                                                                                                                                                                                                                                                                                                                                                                                                                                                                                                                                                                                                    |  |            |           |           |    |                          |                          |                          |    |                          |                          |                          |    |                          |                          |                          |    |                          |                          |                          |    |                          |                          |                          |    |                          |                          |                          |    |                          |                          |                          |    |                          |                          |                          |    |                          |                          |                          |     |                          |                          |                          |     |                          |                          |                          |
| 7.     | <input type="checkbox"/>                                                                                                                                                                                           | <input type="checkbox"/>                                                                                                                                                                                                                                                                                                                                                                                                              | <input type="checkbox"/>                                                                                                                                                                                                                                                                                                                                                                                                                                                                                                                                                                                                                                                                                                                                                                                                                                                                                                                                                                                                                                                                                                                                                                                                                                                                                                                                                                                                                                                                                                                                                                                                                                                                                                                                                                                                                                                                                                                                                                                                                                                                                                                                                                                                                                                                                                                                                                                                                                                                                                                                                                    |  |            |           |           |    |                          |                          |                          |    |                          |                          |                          |    |                          |                          |                          |    |                          |                          |                          |    |                          |                          |                          |    |                          |                          |                          |    |                          |                          |                          |    |                          |                          |                          |    |                          |                          |                          |     |                          |                          |                          |     |                          |                          |                          |
| 8.     | <input type="checkbox"/>                                                                                                                                                                                           | <input type="checkbox"/>                                                                                                                                                                                                                                                                                                                                                                                                              | <input type="checkbox"/>                                                                                                                                                                                                                                                                                                                                                                                                                                                                                                                                                                                                                                                                                                                                                                                                                                                                                                                                                                                                                                                                                                                                                                                                                                                                                                                                                                                                                                                                                                                                                                                                                                                                                                                                                                                                                                                                                                                                                                                                                                                                                                                                                                                                                                                                                                                                                                                                                                                                                                                                                                    |  |            |           |           |    |                          |                          |                          |    |                          |                          |                          |    |                          |                          |                          |    |                          |                          |                          |    |                          |                          |                          |    |                          |                          |                          |    |                          |                          |                          |    |                          |                          |                          |    |                          |                          |                          |     |                          |                          |                          |     |                          |                          |                          |
| 9.     | <input type="checkbox"/>                                                                                                                                                                                           | <input type="checkbox"/>                                                                                                                                                                                                                                                                                                                                                                                                              | <input type="checkbox"/>                                                                                                                                                                                                                                                                                                                                                                                                                                                                                                                                                                                                                                                                                                                                                                                                                                                                                                                                                                                                                                                                                                                                                                                                                                                                                                                                                                                                                                                                                                                                                                                                                                                                                                                                                                                                                                                                                                                                                                                                                                                                                                                                                                                                                                                                                                                                                                                                                                                                                                                                                                    |  |            |           |           |    |                          |                          |                          |    |                          |                          |                          |    |                          |                          |                          |    |                          |                          |                          |    |                          |                          |                          |    |                          |                          |                          |    |                          |                          |                          |    |                          |                          |                          |    |                          |                          |                          |     |                          |                          |                          |     |                          |                          |                          |
| 10.    | <input type="checkbox"/>                                                                                                                                                                                           | <input type="checkbox"/>                                                                                                                                                                                                                                                                                                                                                                                                              | <input type="checkbox"/>                                                                                                                                                                                                                                                                                                                                                                                                                                                                                                                                                                                                                                                                                                                                                                                                                                                                                                                                                                                                                                                                                                                                                                                                                                                                                                                                                                                                                                                                                                                                                                                                                                                                                                                                                                                                                                                                                                                                                                                                                                                                                                                                                                                                                                                                                                                                                                                                                                                                                                                                                                    |  |            |           |           |    |                          |                          |                          |    |                          |                          |                          |    |                          |                          |                          |    |                          |                          |                          |    |                          |                          |                          |    |                          |                          |                          |    |                          |                          |                          |    |                          |                          |                          |    |                          |                          |                          |     |                          |                          |                          |     |                          |                          |                          |
| 11.    | <input type="checkbox"/>                                                                                                                                                                                           | <input type="checkbox"/>                                                                                                                                                                                                                                                                                                                                                                                                              | <input type="checkbox"/>                                                                                                                                                                                                                                                                                                                                                                                                                                                                                                                                                                                                                                                                                                                                                                                                                                                                                                                                                                                                                                                                                                                                                                                                                                                                                                                                                                                                                                                                                                                                                                                                                                                                                                                                                                                                                                                                                                                                                                                                                                                                                                                                                                                                                                                                                                                                                                                                                                                                                                                                                                    |  |            |           |           |    |                          |                          |                          |    |                          |                          |                          |    |                          |                          |                          |    |                          |                          |                          |    |                          |                          |                          |    |                          |                          |                          |    |                          |                          |                          |    |                          |                          |                          |    |                          |                          |                          |     |                          |                          |                          |     |                          |                          |                          |
|        |                                                                                                                                                                                                                    | <p><i>Code:</i></p> <p>1. One service denied</p> <p>2. Two or more services denied</p> <p>3. No denied service identified</p>                                                                                                                                                                                                                                                                                                         | <input type="checkbox"/>                                                                                                                                                                                                                                                                                                                                                                                                                                                                                                                                                                                                                                                                                                                                                                                                                                                                                                                                                                                                                                                                                                                                                                                                                                                                                                                                                                                                                                                                                                                                                                                                                                                                                                                                                                                                                                                                                                                                                                                                                                                                                                                                                                                                                                                                                                                                                                                                                                                                                                                                                                    |  |            |           |           |    |                          |                          |                          |    |                          |                          |                          |    |                          |                          |                          |    |                          |                          |                          |    |                          |                          |                          |    |                          |                          |                          |    |                          |                          |                          |    |                          |                          |                          |    |                          |                          |                          |     |                          |                          |                          |     |                          |                          |                          |
| V5.165 | <p><i>Read:</i> Now I have four last questions about the child and the child's mother.</p> <p>Before the fatal illness began, did the child suffer from HIV/AIDS?</p>                                              | <p>1. Yes</p> <p>2. No</p> <p>8. Refused to answer</p> <p>9. Don't know</p>                                                                                                                                                                                                                                                                                                                                                           | <input type="checkbox"/>                                                                                                                                                                                                                                                                                                                                                                                                                                                                                                                                                                                                                                                                                                                                                                                                                                                                                                                                                                                                                                                                                                                                                                                                                                                                                                                                                                                                                                                                                                                                                                                                                                                                                                                                                                                                                                                                                                                                                                                                                                                                                                                                                                                                                                                                                                                                                                                                                                                                                                                                                                    |  |            |           |           |    |                          |                          |                          |    |                          |                          |                          |    |                          |                          |                          |    |                          |                          |                          |    |                          |                          |                          |    |                          |                          |                          |    |                          |                          |                          |    |                          |                          |                          |    |                          |                          |                          |     |                          |                          |                          |     |                          |                          |                          |
| V5.17  | (Have you / Has the deceased's biological mother) ever been tested for "HIV"?                                                                                                                                      | <p>1. Yes</p> <p>2. No</p> <p>8. Refused to answer</p> <p>9. Don't know</p>                                                                                                                                                                                                                                                                                                                                                           | <input type="checkbox"/> 2-9 → <b>VQ5.19</b>                                                                                                                                                                                                                                                                                                                                                                                                                                                                                                                                                                                                                                                                                                                                                                                                                                                                                                                                                                                                                                                                                                                                                                                                                                                                                                                                                                                                                                                                                                                                                                                                                                                                                                                                                                                                                                                                                                                                                                                                                                                                                                                                                                                                                                                                                                                                                                                                                                                                                                                                                |  |            |           |           |    |                          |                          |                          |    |                          |                          |                          |    |                          |                          |                          |    |                          |                          |                          |    |                          |                          |                          |    |                          |                          |                          |    |                          |                          |                          |    |                          |                          |                          |    |                          |                          |                          |     |                          |                          |                          |     |                          |                          |                          |
| V5.18  | Was the "HIV" test ever positive?                                                                                                                                                                                  | <p>1. Yes</p> <p>2. No</p> <p>8. Refused to answer</p> <p>9. Don't know</p>                                                                                                                                                                                                                                                                                                                                                           | <input type="checkbox"/>                                                                                                                                                                                                                                                                                                                                                                                                                                                                                                                                                                                                                                                                                                                                                                                                                                                                                                                                                                                                                                                                                                                                                                                                                                                                                                                                                                                                                                                                                                                                                                                                                                                                                                                                                                                                                                                                                                                                                                                                                                                                                                                                                                                                                                                                                                                                                                                                                                                                                                                                                                    |  |            |           |           |    |                          |                          |                          |    |                          |                          |                          |    |                          |                          |                          |    |                          |                          |                          |    |                          |                          |                          |    |                          |                          |                          |    |                          |                          |                          |    |                          |                          |                          |    |                          |                          |                          |     |                          |                          |                          |     |                          |                          |                          |
| V5.19  | (Have you / Has the deceased's biological mother) ever been told she had "AIDS" by a health worker?                                                                                                                | <p>1. Yes</p> <p>2. No</p> <p>8. Refused to answer</p> <p>9. Don't know</p>                                                                                                                                                                                                                                                                                                                                                           | <input type="checkbox"/>                                                                                                                                                                                                                                                                                                                                                                                                                                                                                                                                                                                                                                                                                                                                                                                                                                                                                                                                                                                                                                                                                                                                                                                                                                                                                                                                                                                                                                                                                                                                                                                                                                                                                                                                                                                                                                                                                                                                                                                                                                                                                                                                                                                                                                                                                                                                                                                                                                                                                                                                                                    |  |            |           |           |    |                          |                          |                          |    |                          |                          |                          |    |                          |                          |                          |    |                          |                          |                          |    |                          |                          |                          |    |                          |                          |                          |    |                          |                          |                          |    |                          |                          |                          |    |                          |                          |                          |     |                          |                          |                          |     |                          |                          |                          |

Study ID#

|                 |  |  |  |    |  |  |       |  |  |
|-----------------|--|--|--|----|--|--|-------|--|--|
|                 |  |  |  |    |  |  |       |  |  |
| Village/Cluster |  |  |  | HH |  |  | Child |  |  |

**CHILD HEALTH EPIDEMIOLOGY REFERENCE GROUP  
SB/NN/CHILD VERBAL/SOCIAL AUTOPSY QUESTIONNAIRE**

**VA Section 6 & SA Module 7: Open ended response & interviewer comments/observations (FOR ALL DEATHS)**

*Read:* Thank you for answering the many questions that I've asked. Would you like to tell me about <NAME>'s illness in your own words? Also, is there anything else about her/his illness that I did not ask and you would like to tell me about?

*After the respondent(s) finishes, ask:* Is there anything else?

*Write the respondent's exact words. After s/he has finished, read this back and ask her to correct any errors in what you wrote.*

---

---

---

---

---

---

---

---

---

---

---

---

---

---

---

---

---

---

---

---

---

---

---

---

---

**END OF INTERVIEW  
THANK RESPONDENT FOR HER/HIS PARTICIPATION**

*Interviewer: Use this space to write down your comments and observations about the interview.*

---

---

---

---

---

---

---

---

---

---

---

---

---

---

---

---

---

---

---

---

---

---

---

---

---
